# Supplementary material
Source: PubMed Central journal article supplement (PMC5409222)

## **Chemical Synthesis of (+)-Ryanodine and (+)-20-Deoxyspiganthine**

Chen Xu, Arthur Han, Scott C. Virgil, Sarah E. Reisman\*

*The Warren and Katharine Schlinger Laboratory for Chemistry and Chemical Engineering*

*Division of Chemistry and Chemical Engineering, California Institute of Technology*

*Pasadena, California 91125*

*reisman@caltech.edu*

**Supporting Information:**

## Table of Contents

|                                                                                                                |     |
|----------------------------------------------------------------------------------------------------------------|-----|
| 1. General Procedures.....                                                                                     | S3  |
| 2. Positional Numbering System.....                                                                            | S3  |
| 3. Synthetic Scheme of Inoue's Synthesis of Ryanodine and Conversion of Ryanodol to Ryanodine.....             | S4  |
| 3. Synthetic Procedures.....                                                                                   | S5  |
| 4. <sup>1</sup> H and <sup>13</sup> C NMR Comparison Tables for (+)-Ryanodine and (+)-20-Deoxyspiganthine..... | S23 |
| 5. Single Crystal X-ray Diffraction Data.....                                                                  | S27 |
| 6. References.....                                                                                             | S32 |
| 7. <sup>1</sup> H and <sup>13</sup> C NMR Spectral Data.....                                                   | S34 |

## 1. General Procedures

Unless otherwise stated, reactions were performed under an inert atmosphere (dry N<sub>2</sub> or Ar) with freshly dried solvents utilizing standard Schlenk techniques. Glassware was oven-dried at 120 °C for a minimum of four hours, or flame-dried utilizing a Bunsen burner under high vacuum. Tetrahydrofuran (THF), methylene chloride (CH<sub>2</sub>Cl<sub>2</sub>), *N,N*-dimethylformamide (DMF), benzene (PhH), and toluene (PhMe) were dried by passing through activated alumina columns. 2-Methyltetrahydrofuran (anhydrous, >99%, inhibitor-free) was purchased from Sigma-Aldrich and stored under argon. Methanol (HPLC grade) was purchased from Fisher Scientific. Pyridine (Pyr) was distilled from calcium hydride immediately prior to use. All reactions were monitored by thin-layer chromatography using EMD/Merck silica gel 60 F254 pre-coated plates (0.25 mm) and were visualized by UV (254 nm), *p*-anisaldehyde, CAM, and/or KMnO<sub>4</sub> staining. Flash column chromatography was performed using silica gel (SiliaFlash® P60, particle size 40-63 microns [230 to 400 mesh]) purchased from Silicycle. <sup>1</sup>H and <sup>13</sup>C NMR spectra were recorded on a Bruker Avance III HD with Prodigy Cryoprobe (at 400 MHz and 101 MHz, respectively), Varian Inova 500 (at 500 MHz and 126 MHz, respectively), or Varian Inova 600 (at 600 MHz and 150 MHz, respectively), and are reported relative to internal CHCl<sub>3</sub> (<sup>1</sup>H, δ = 7.26), C<sub>6</sub>H<sub>6</sub> (<sup>1</sup>H, δ = 7.16), or CD<sub>2</sub>HOD (<sup>1</sup>H, δ = 3.31), and CDCl<sub>3</sub> (<sup>13</sup>C, δ = 77.0), C<sub>6</sub>D<sub>6</sub> (<sup>13</sup>C, δ = 128.0), or CD<sub>3</sub>OD (<sup>13</sup>C, δ = 49.0). Data for <sup>1</sup>H NMR spectra are reported as follows: chemical shift (δ ppm) (multiplicity, coupling constant (Hz), integration). Multiplicity and qualifier abbreviations are as follows: s = singlet, d = doublet, t = triplet, q = quartet, m = multiplet, br = broad, app = apparent. IR spectra were recorded on a Perkin Elmer Paragon 1000 spectrometer and are reported in frequency of absorption (cm<sup>-1</sup>). HRMS were acquired using an Agilent 6200 Series TOF with an Agilent G1978A Multimode source in electrospray ionization (ESI), atmospheric pressure chemical ionization (APCI), or mixed (MM) ionization mode. Optical rotations were measured on a Jasco P-2000 polarimeter using a 100 mm path-length cell at 589 nm.

Reagents were purchased from commercial vendors as follows: *trans*-Dichlorobis(triphenylphosphine) palladium was purchased from Strem Chemicals and stored in a nitrogen-filled glovebox. Sodium hydride (dry, 95%), 2-(trichloroacetyl)pyrrole, solid potassium bis(trimethylsilyl)amide (KHMDs, 95%), and tris(dimethylamino)sulfonium difluorotrimethylsilicate (TAS-F) were purchased from Sigma-Aldrich and stored in a nitrogen-filled glovebox. Platinum oxide (Adam's catalyst) and vanadyl acetylacetonate were purchased from Strem Chemicals. *Tert*-butyl hydroperoxide (TBHP, 5.5 M in decane over 4 Å MS), solid LiBH<sub>4</sub> (>95%), lithium (wire stored in mineral oil, 99.9% trace metal basis), and 4,4'-di-*tert*-butylbiphenyl were purchased from Sigma-Aldrich.

## 2. Positional numbering system

The carbon numbering system and ring assignment as outlined by Deslongchamps<sup>1-5</sup> and used by Inoue<sup>6-9</sup> are utilized throughout this Supplementary Materials file for <sup>1</sup>H and <sup>13</sup>C NMR assignments of all intermediates. Assignments were made with the aid of 2D <sup>1</sup>H-<sup>1</sup>H (NOESY and COSY) and <sup>1</sup>H-<sup>13</sup>C coupling experiments (HSQC and HMBC).

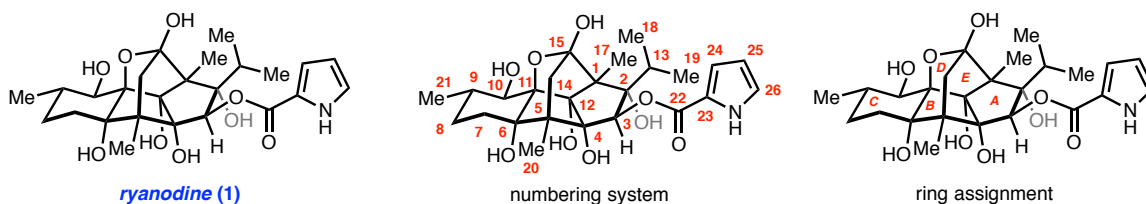

### 3. Synthetic Scheme of Inoue's Synthesis of Ryanodine and Conversion of Ryanodol to Ryanodine

#### Scheme S1. Inoue's Total Synthesis of Ryanodine and Conversion of Ryanodol to Ryanodine

a. 10-step conversion of (+)-ryanodol to (+)-ryanodine

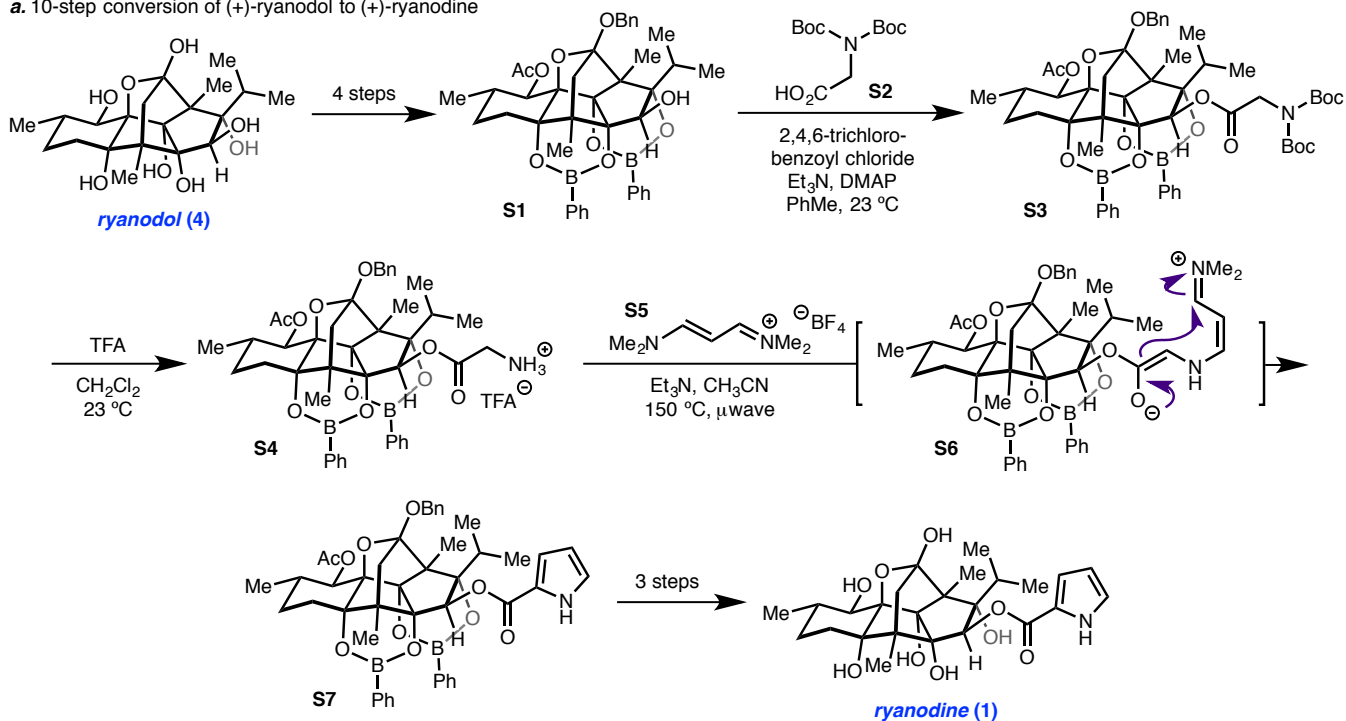

b. Total chemical synthesis of (+)-ryanodol and (+)-ryanodine

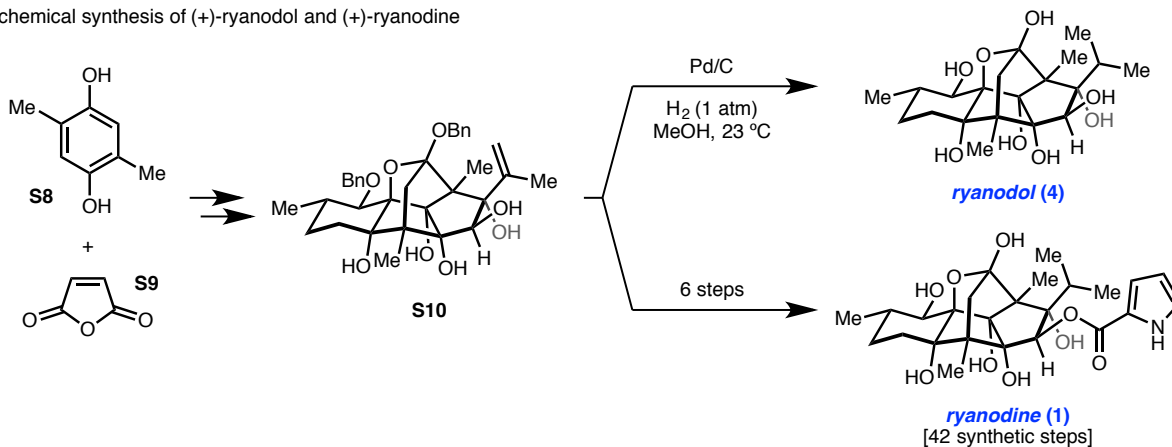

## 4. Synthetic Procedures

### Preparation of boronate ester **13**:

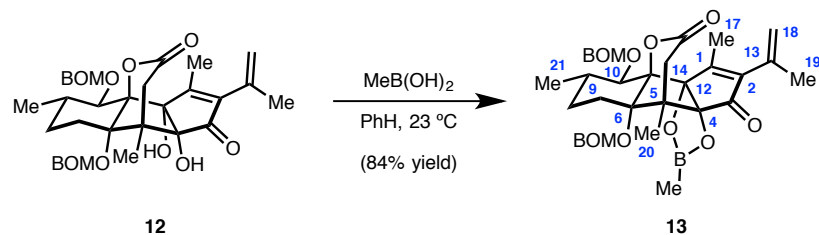

In slight modification of a procedure<sup>9</sup> detailed by Inoue and coworkers, PhH (66 mL) was added to a mixture of **12** (1.06 g, 1.71 mmol, 1.0 equiv) and  $\text{MeB(OH)}_2$  (1.02 g, 17.1 mmol, 10 equiv) in an oven-dried, 200 mL round-bottomed flask. The resultant mixture was concentrated *in vacuo*. This azeotropic procedure of adding PhH (66 mL) and concentrating was repeated 10 times to complete the conversion of **12** to boronate ester **13**. Purification of the crude mixture by  $\text{SiO}_2$  flash chromatography (25% EtOAc/hexanes) afforded the desired product **13** as a white foam (920 mg, 1.43 mmol, 84% yield).

**TLC (25% EtOAc/hexanes):**  $R_f$  0.40 (UV,  $\text{KMnO}_4$ ).

**$^1\text{H NMR}$  (400 MHz,  $\text{CDCl}_3$ ):**  $\delta$  7.43 – 7.30 (m, 10H,  $\text{PhCH}_2\text{OCH}_2\text{O}$ ), 5.30 (p,  $J = 1.6$  Hz, 1H, C<sub>18</sub>), 5.25 (d,  $J = 6.5$  Hz, 1H,  $\text{PhCH}_2\text{OCH}_2\text{O}$ ), 5.09 (d,  $J = 7.0$  Hz, 1H,  $\text{PhCH}_2\text{OCH}_2\text{O}$ ), 5.05 (d,  $J = 6.6$  Hz, 1H,  $\text{PhCH}_2\text{OCH}_2\text{O}$ ), 4.90 (d,  $J = 12.0$  Hz, 1H,  $\text{PhCH}_2\text{OCH}_2\text{O}$ ), 4.86 (dt,  $J = 1.9, 1.0$  Hz, 1H, C<sub>18</sub>), 4.82 (d,  $J = 7.0$  Hz, 1H,  $\text{PhCH}_2\text{OCH}_2\text{O}$ ), 4.68 (d,  $J = 12.0$  Hz, 1H,  $\text{PhCH}_2\text{OCH}_2\text{O}$ ), 4.78 (d,  $J = 11.3$  Hz, 1H,  $\text{PhCH}_2\text{OCH}_2\text{O}$ ), 4.46 (d,  $J = 11.3$  Hz, 1H,  $\text{PhCH}_2\text{OCH}_2\text{O}$ ), 4.16 (d,  $J = 10.6$  Hz, 1H, C<sub>10</sub>), 2.53 (d,  $J = 19.8$  Hz, 1H, C<sub>14</sub>), 2.41 (d,  $J = 19.9$  Hz, 1H, C<sub>14</sub>), 2.32 (s, 3H, C<sub>17</sub>), 2.21 – 2.09 (m, 1H, C<sub>9</sub>), 1.99 (ddd,  $J = 14.6, 4.4, 1.9$  Hz, 1H, C<sub>7</sub>), 1.90 (q,  $J = 11.3$  Hz, 1.5 Hz, 3H, C<sub>19</sub>), 1.94 – 1.79 (m, 1H, C<sub>8</sub>), 1.66 (dtd,  $J = 13.5, 4.6, 1.7$  Hz, 1H, C<sub>8</sub>), 1.61–1.52 (m, 1H, C<sub>7</sub>), 1.31 (s, 3H, C<sub>20</sub>), 1.18 (d,  $J = 6.5$  Hz, 3H, C<sub>21</sub>), 0.37 (s, 3H,  $\text{BCH}_3$ ).

**$^{13}\text{C NMR}$  (101 MHz,  $\text{CDCl}_3$ ):**  $\delta$  199.5 (C<sub>3</sub>=O), 168.3 (C<sub>1</sub>), 166.6 (C<sub>15</sub>=O), 145.8 (C<sub>2</sub>), 137.8 (C<sub>Ph</sub>), 136.8 (C<sub>Ph</sub>), 135.3 (C<sub>13</sub>), 128.6 (C<sub>Ph</sub>), 128.5 (C<sub>Ph</sub>), 128.1 (C<sub>Ph</sub>), 127.9 (C<sub>Ph</sub>), 127.8 (C<sub>Ph</sub>), 118.7 (C<sub>18</sub>), 97.1 (C<sub>11</sub>), 97.1 (C<sub>12</sub>), 94.3 (C<sub>4</sub>), 93.5 ( $\text{PhCH}_2\text{OCH}_2\text{O}$ ), 91.0 (C<sub>6</sub>), 90.6 ( $\text{PhCH}_2\text{OCH}_2\text{O}$ ), 79.6 (C<sub>10</sub>), 71.0 ( $\text{PhCH}_2\text{OCH}_2\text{O}$ ), 70.8 ( $\text{PhCH}_2\text{OCH}_2\text{O}$ ), 46.7 (C<sub>5</sub>), 40.6 (C<sub>14</sub>), 32.5 (C<sub>9</sub>), 27.7 (C<sub>8</sub>), 21.5 (C<sub>19</sub>), 21.3 (C<sub>7</sub>), 18.9 (C<sub>21</sub>), 15.3 (C<sub>15</sub>), 15.1 (C<sub>17</sub>), –5.1 ( $\text{BCH}_3$ ).

**FTIR (NaCl, thin film):** 2956, 2872, 1755, 1716, 1361, 1268, 1022, 1020  $\text{cm}^{-1}$ .

**HRMS (MM:ESI–APCI):** calc'd for  $[\text{M}+\text{H}]^+$  643.3078, found 643.3072.

$[\alpha]_D^{25}$ : +175° ( $c = 0.505$ ,  $\text{CHCl}_3$ ).

### Preparation of alcohol **14**:

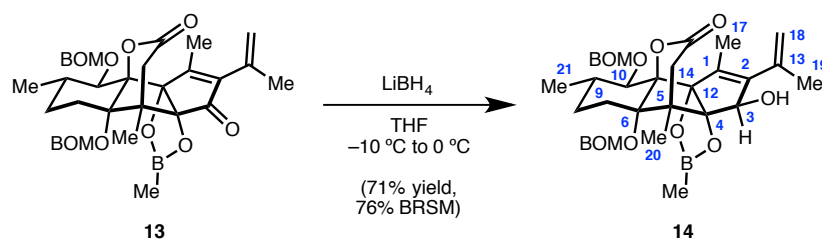

To an oven-dried, 200 mL round-bottomed flask was added enone **13** (920 mg, 1.43 mmol, 1.0 equiv) and anhydrous THF (57 mL). The solution was cooled to –10 °C in an ice/acetone bath and solid  $\text{LiBH}_4$  (156 mg, 7.16 mmol, 5.0 equiv) was added. After 1 h, a second portion of solid  $\text{LiBH}_4$  (156 mg, 7.16 mmol, 5.0 equiv) was

added before warming the reaction mixture to 0 °C with an ice/water bath. Stirring was continued at 0 °C for another 1 h before a third portion of solid LiBH<sub>4</sub> (156 mg, 7.16 mmol, 5.0 equiv) was added. The reaction was allowed to stir at 0 °C an additional 1 h before sat. aq. NH<sub>4</sub>Cl (40 mL) was slowly added to the reaction at 0 °C [Caution! Vigorous evolution of H<sub>2</sub> gas occurs, particularly in the initial stages of addition. Careful, controlled dropwise addition is advised in order to avoid a violent reaction]. The mixture was diluted with EtOAc (40 mL), the two layers separated, and the organic layer washed with sat. aq. NH<sub>4</sub>Cl (40 mL). The combined aqueous layers were extracted with EtOAc (2 x 20 mL), and the combined organic layers were washed with brine (20 mL), dried over Na<sub>2</sub>SO<sub>4</sub>, filtered, and concentrated *in vacuo*. The crude residue was purified by SiO<sub>2</sub> flash chromatography (30 to 40 to 50% EtOAc/hexanes) to afford recovered starting material enone **13** (61 mg, 0.095 mmol, 7% yield) and the desired alcohol **14** as a white foam (650 mg, 1.01 mmol, 71% yield, 76% BRSM).

**TLC (40% EtOAc/hexanes):** R<sub>f</sub> 0.30 (UV, *p*-anisaldehyde).

**<sup>1</sup>H NMR (400 MHz, CDCl<sub>3</sub>):** δ 7.41 – 7.30 (m, 10H, PhCH<sub>2</sub>OCH<sub>2</sub>O), 5.25 (d, *J* = 6.8 Hz, 1H, PhCH<sub>2</sub>OCH<sub>2</sub>O), 5.23 (t, *J* = 1.7 Hz, 1H, C<sub>18</sub>), 5.09 (d, *J* = 6.9 Hz, 1H, PhCH<sub>2</sub>OCH<sub>2</sub>O), 4.98 (d, *J* = 6.8 Hz, 1H, PhCH<sub>2</sub>OCH<sub>2</sub>O), 4.93 – 4.90 (m, 1H, C<sub>3</sub>), 4.90 – 4.87 (m, 1H, C<sub>18</sub>), 4.89 (d, *J* = 8.0 Hz, 1H, PhCH<sub>2</sub>OCH<sub>2</sub>O), 4.80 (d, *J* = 7.0 Hz, 1H, PhCH<sub>2</sub>OCH<sub>2</sub>O), 4.77 (d, *J* = 11.6 Hz, 1H, PhCH<sub>2</sub>OCH<sub>2</sub>O), 4.62 (d, *J* = 12.0 Hz, 1H, PhCH<sub>2</sub>OCH<sub>2</sub>O), 4.42 (d, *J* = 11.4 Hz, 1H, PhCH<sub>2</sub>OCH<sub>2</sub>O), 4.10 (d, *J* = 10.4 Hz, 1H, C<sub>10</sub>), 3.79 (d, *J* = 19.9 Hz, 1H, C<sub>14</sub>), 2.33 (d, *J* = 19.8 Hz, 1H, C<sub>14</sub>), 2.21 – 2.10 (m, 1H, C<sub>9</sub>), 2.08 (d, *J* = 4.4 Hz, 1H, OH), 1.92 (d, *J* = 2.4 Hz, 3H, C<sub>17</sub>), 1.88 – 1.83 (m, 3H, C<sub>19</sub>), 1.98-1.89 (m, 1H, C<sub>7</sub>), 1.93-1.82 (m, 1H, C<sub>8</sub>), 1.69-1.61 (m, 1H, C<sub>8</sub>), 1.64-1.53 (m, 1H, C<sub>7</sub>), 1.31 (s, 3H, C<sub>20</sub>), 1.18 (d, *J* = 6.5 Hz, 3H, C<sub>21</sub>), 0.33 (s, 3H, BCH<sub>3</sub>).

**<sup>13</sup>C NMR (101 MHz, CDCl<sub>3</sub>):** δ 168.6 (C<sub>15</sub>=O), 145.8 (C<sub>2</sub>), 138.2 (C<sub>13</sub>), 138.0 (C<sub>Ph</sub>), 137.1 (C<sub>Ph</sub>), 135.0 (C<sub>1</sub>), 128.5 (C<sub>Ph</sub>), 128.4 (C<sub>Ph</sub>), 128.0 (C<sub>Ph</sub>), 127.8 (C<sub>Ph</sub>), 127.8 (C<sub>Ph</sub>), 127.6 (C<sub>Ph</sub>), 117.7 (C<sub>18</sub>), 102.3 (C<sub>12</sub>), 98.7 (C<sub>4</sub>), 97.2 (PhCH<sub>2</sub>OCH<sub>2</sub>O), 92.1 (C<sub>6</sub>), 91.0 (C<sub>11</sub>), 90.5 (PhCH<sub>2</sub>OCH<sub>2</sub>O), 84.6 (C<sub>3</sub>), 80.3 (C<sub>10</sub>), 70.8 (PhCH<sub>2</sub>OCH<sub>2</sub>O), 70.6 (PhCH<sub>2</sub>OCH<sub>2</sub>O), 49.3 (C<sub>5</sub>), 39.0 (C<sub>14</sub>), 32.6 (C<sub>9</sub>), 27.9 (C<sub>8</sub>), 21.5 (C<sub>19</sub>), 21.0 (C<sub>7</sub>), 19.1 (C<sub>21</sub>), 16.5 (C<sub>20</sub>), 13.3 (C<sub>17</sub>), -5.1 (BCH<sub>3</sub>).

**FTIR (NaCl, thin film):** 3453, 2924, 1747, 1362, 1037 cm<sup>-1</sup>.

**HRMS (MM:ESI-APCI):** calc'd for [M+NH<sub>4</sub>]<sup>+</sup> 662.3500, found 662.3509.

[α]<sub>D</sub><sup>25</sup>: +67° (*c* = 0.385, CHCl<sub>3</sub>).

### Preparation of pyrrole ester **16**:

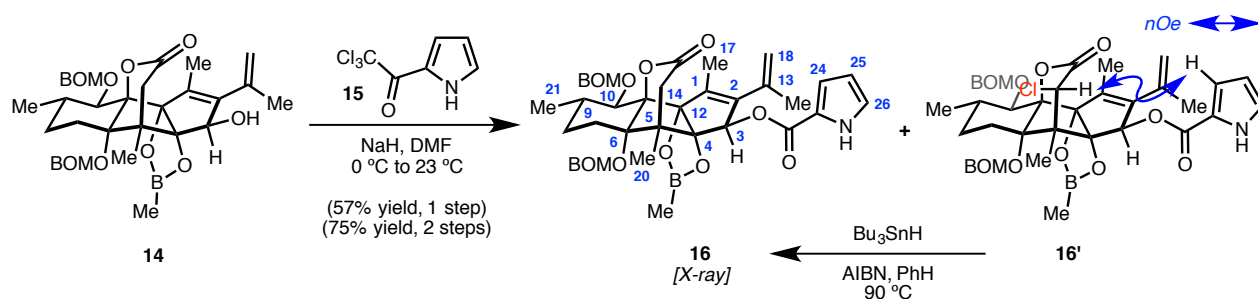

An oven-dried, 50 mL round-bottomed flask was charged with NaH (95%, 51 mg, 2.0 mmol, 4.0 equiv) in a nitrogen-filled glovebox. The flask was capped with a rubber septum, removed from the glovebox and cooled to 0 °C. Alcohol **14** (322 mg, 0.5 mmol, 1.0 equiv) in anhydrous DMF (5.0 mL) was next *rapidly* added and another portion of DMF (5.0 mL) was then used to render the transfer quantitative. The resulting reaction mixture was stirred for 30 min at 0 °C before 2-(trichloroacetyl)pyrrole (425 mg, 2.0 mmol, 4.0 equiv) in anhydrous DMF (5.0 mL) was added dropwise via syringe. After continued stirring for 30 min at 0 °C, the resulting dark-brown mixture was warmed to ambient temperature and stirring was continued for 48 h. The reaction was diluted with Et<sub>2</sub>O (15 mL) and then carefully quenched with the addition of sat. aq. NH<sub>4</sub>Cl (15 mL). The layers were separated

and the organic layer was washed with H<sub>2</sub>O (2 x 20 mL). The combined aqueous layers were extracted with Et<sub>2</sub>O (3 x 20 mL) and the combined organic layers were then washed with brine (20 mL), dried over Na<sub>2</sub>SO<sub>4</sub>, filtered, and concentrated *in vacuo*. The crude residue was purified by SiO<sub>2</sub> flash chromatography (15 to 20 to 25 to 30% EtOAc/hexanes) to afford pyrrole ester **16** (212 mg, 0.287 mmol, 57% yield) and chloride **16'** (69.7 mg, 0.089 mmol, 18% yield). The stereochemistry of the chloride substituted C<sub>14</sub>-H was determined by nOe analysis.

An oven-dried, 50 mL Schlenk tube was charged with chloride **16'** (69.7 mg, 0.089 mmol, 1.0 equiv) and benzene (8.9 mL) under N<sub>2</sub>. The Schlenk tube was then placed in a preheated oil bath (90 °C) before a solution of AIBN (14.6 mg, 0.089 mmol, 1.0 equiv) and Bu<sub>3</sub>SnH (0.178 mL, 0.178 mmol, 2.0 equiv) in benzene (8.9 mL) was added dropwise via syringe at 90 °C. Upon complete addition, the reaction mixture was stirred for 1 h at 90 °C at which point TLC analysis indicated the complete consumption of starting material. The reaction mixture was cooled to ambient temperature, transferred to a 50 mL round-bottomed flask and concentrated *in vacuo*. The crude residue was purified by SiO<sub>2</sub> flash chromatography (25% EtOAc/hexanes) to afford pyrrole ester **16**, which was combined with the pure material obtained in the previous step to give a combined 277 mg of pyrrole ester **16** (0.376 mmol, 75% combined yield).

### Pyrrole ester **16**:

**TLC (25% EtOAc/hexanes):** R<sub>f</sub> 0.30 (UV, *p*-anisaldehyde).

**<sup>1</sup>H NMR (400 MHz, CDCl<sub>3</sub>):** δ 9.32 (s, 1H, NH), 7.44 – 7.29 (m, 10H, PhCH<sub>2</sub>OCH<sub>2</sub>O), 7.05 (td, *J* = 2.7, 1.4 Hz, 1H, C<sub>26</sub>), 6.94 (ddd, *J* = 3.8, 2.4, 1.4 Hz, 1H, C<sub>24</sub>), 6.32 (dt, *J* = 3.9, 2.5 Hz, 1H, C<sub>25</sub>), 6.25 (q, *J* = 2.3 Hz, 1H, C<sub>3</sub>), 5.26 (d, *J* = 6.8 Hz, 1H, PhCH<sub>2</sub>OCH<sub>2</sub>O), 5.14 (p, *J* = 1.6 Hz, 1H, C<sub>18</sub>), 5.04 (d, *J* = 6.9 Hz, 1H, PhCH<sub>2</sub>OCH<sub>2</sub>O), 5.01 (d, *J* = 6.8 Hz, 1H, PhCH<sub>2</sub>OCH<sub>2</sub>O), 4.91 (d, *J* = 11.8 Hz, 1H, PhCH<sub>2</sub>OCH<sub>2</sub>O), 4.91-4.88 (m, 1H, C<sub>18</sub>), 4.77 (d, *J* = 12.0 Hz, 1H, PhCH<sub>2</sub>OCH<sub>2</sub>O), 4.77 (d, *J* = 6.9 Hz, 1H, PhCH<sub>2</sub>OCH<sub>2</sub>O), 4.64 (d, *J* = 6.9 Hz, 1H, PhCH<sub>2</sub>OCH<sub>2</sub>O), 4.40 (d, *J* = 11.3 Hz, 1H, PhCH<sub>2</sub>OCH<sub>2</sub>O), 4.12 (d, *J* = 10.5 Hz, 1H, C<sub>10</sub>), 3.57 (d, *J* = 19.8 Hz, 1H, C<sub>14</sub>), 2.46 (d, *J* = 19.7 Hz, 1H, C<sub>14</sub>), 2.16 (dddd, *J* = 11.6, 8.9, 6.6, 5.1 Hz, 1H, C<sub>9</sub>), 1.98 (d, *J* = 2.5 Hz, 3H, C<sub>17</sub>), 1.97-1.90 (m, 1H, C<sub>7</sub>), 1.93-1.85 (m, 1H, C<sub>8</sub>), 1.69-1.60 (m, 1H, C<sub>8</sub>), 1.64-1.56 (m, 1H, C<sub>7</sub>), 1.75 (d, *J* = 1.2 Hz, 3H, C<sub>19</sub>), 1.19 (d, *J* = 6.5 Hz, 3H, C<sub>21</sub>), 1.11 (s, 3H, C<sub>20</sub>), 0.38 (s, 3H, BCH<sub>3</sub>).

**<sup>13</sup>C NMR (101 MHz, CDCl<sub>3</sub>):** δ 168.1 (C<sub>15</sub>=O), 159.8 (C<sub>22</sub>=O), 143.3 (C<sub>2</sub>), 138.0 (C<sub>13</sub>), 137.3 (C<sub>Ph</sub>), 137.0 (C<sub>Ph</sub>), 137.0 (C<sub>1</sub>), 128.5 (C<sub>Ph</sub>), 128.4 (C<sub>Ph</sub>), 128.0 (C<sub>Ph</sub>), 127.8 (C<sub>Ph</sub>), 127.6 (C<sub>Ph</sub>), 124.2 (C<sub>26</sub>), 121.6 (C<sub>23</sub>), 117.9 (C<sub>18</sub>), 116.1 (C<sub>24</sub>), 110.9 (C<sub>25</sub>), 102.5 (C<sub>12</sub>), 98.7 (C<sub>4</sub>), 97.2 (PhCH<sub>2</sub>OCH<sub>2</sub>O), 92.1 (C<sub>6</sub>), 91.1 (C<sub>11</sub>), 90.5 (PhCH<sub>2</sub>OCH<sub>2</sub>O), 83.4 (C<sub>3</sub>), 80.2 (C<sub>10</sub>), 70.9 (PhCH<sub>2</sub>OCH<sub>2</sub>O), 70.6 (PhCH<sub>2</sub>OCH<sub>2</sub>O), 49.3 (C<sub>5</sub>), 39.3 (C<sub>14</sub>), 32.6 (C<sub>9</sub>), 27.9 (C<sub>8</sub>), 21.1 (C<sub>19</sub>), 21.1 (C<sub>7</sub>), 19.0 (C<sub>21</sub>), 16.2 (C<sub>20</sub>), 13.4 (C<sub>17</sub>), -4.9 (BCH<sub>3</sub>).

**FTIR (NaCl, thin film):** 3307, 2928, 1750, 1707, 1042, 1016 cm<sup>-1</sup>.

**HRMS (MM:ESI-APCI):** calc'd for [M+H]<sup>+</sup> 738.3450, found 738.3456.

[α]<sub>D</sub><sup>25</sup>: +2° (*c* = 0.630, CHCl<sub>3</sub>).

### Chloride **16'**:

**TLC (25% EtOAc/hexanes):** R<sub>f</sub> 0.45 (UV, *p*-anisaldehyde).

**<sup>1</sup>H NMR (400 MHz, CDCl<sub>3</sub>):** δ 9.28 (s, 1H, NH), 7.43 – 7.29 (m, 10H, PhCH<sub>2</sub>OCH<sub>2</sub>O), 7.07 (td, *J* = 2.7, 1.4 Hz, 1H, C<sub>26</sub>), 7.00 (ddd, *J* = 3.9, 2.5, 1.4 Hz, 1H, C<sub>24</sub>), 6.34 (dt, *J* = 3.8, 2.5 Hz, 1H, C<sub>25</sub>), 6.30 (q, *J* = 2.4 Hz, 1H, C<sub>3</sub>), 5.64 (s, 1H, C<sub>14</sub>), 5.24 (d, *J* = 6.7 Hz, 1H, PhCH<sub>2</sub>OCH<sub>2</sub>O), 5.19 – 5.10 (m, 1H, C<sub>18</sub>), 5.05 (d, *J* = 6.9 Hz, 1H, PhCH<sub>2</sub>OCH<sub>2</sub>O), 5.01 (d, *J* = 6.7 Hz, 1H, PhCH<sub>2</sub>OCH<sub>2</sub>O), 4.90 (d, *J* = 12.0 Hz, 1H, PhCH<sub>2</sub>OCH<sub>2</sub>O), 4.88 – 4.84 (m, 1H, C<sub>18</sub>), 4.76 (d, *J* = 6.9 Hz, 1H, PhCH<sub>2</sub>OCH<sub>2</sub>O), 4.74 (d, 11.3 Hz, 1H, PhCH<sub>2</sub>OCH<sub>2</sub>O), 4.65 (d, *J* = 12.0 Hz, 1H, PhCH<sub>2</sub>OCH<sub>2</sub>O), 4.40 (d, *J* = 11.3 Hz, 1H, PhCH<sub>2</sub>OCH<sub>2</sub>O), 4.10 (d, *J* = 10.5 Hz, 1H, C<sub>10</sub>), 2.22 – 2.10 (m, 1H, C<sub>9</sub>), 2.09 – 2.00 (m, 2H, C<sub>7</sub>), 1.98 (d, *J* = 2.5 Hz, 3H, C<sub>17</sub>), 1.92 – 1.79 (m, 1H, C<sub>8</sub>), 1.75 (d, *J* = 1.2 Hz, 3H, C<sub>19</sub>), 1.68 (d, *J* = 1.4 Hz, 1H, C<sub>8</sub>), 1.35 (s, 3H, C<sub>20</sub>), 1.19 (d, *J* = 6.4 Hz, 3H, C<sub>21</sub>), 0.39 (s, 3H, BCH<sub>3</sub>).

**<sup>13</sup>C NMR (101 MHz, CDCl<sub>3</sub>):** δ 165.8 (C<sub>15</sub>=O), 159.3 (C<sub>22</sub>=O), 143.5 (C<sub>2</sub>), 137.9 (C<sub>13</sub>), 136.9 (C<sub>Ph</sub>), 136.8 (C<sub>Ph</sub>), 136.8 (C<sub>1</sub>), 128.6 (C<sub>Ph</sub>), 128.4 (C<sub>Ph</sub>), 128.0 (C<sub>Ph</sub>), 127.8 (C<sub>Ph</sub>), 127.7 (C<sub>Ph</sub>), 127.7 (C<sub>Ph</sub>), 124.5 (C<sub>26</sub>), 121.1 (C<sub>23</sub>),

118.4 (C<sub>18</sub>), 116.5 (C<sub>24</sub>), 111.2 (C<sub>25</sub>), 101.9 (C<sub>12</sub>), 98.9 (C<sub>4</sub>), 97.2 (PhCH<sub>2</sub>OCH<sub>2</sub>O), 92.1 (C<sub>6</sub>), 91.2 (C<sub>11</sub>), 90.6 (PhCH<sub>2</sub>OCH<sub>2</sub>O), 82.9 (C<sub>3</sub>), 80.2 (C<sub>10</sub>), 70.9 (PhCH<sub>2</sub>OCH<sub>2</sub>O), 70.7 (PhCH<sub>2</sub>OCH<sub>2</sub>O), 57.2 (C<sub>14</sub>), 54.7 (C<sub>5</sub>), 32.8 (C<sub>9</sub>), 27.9 (C<sub>8</sub>), 23.3 (C<sub>7</sub>), 21.1 (C<sub>19</sub>), 19.0 (C<sub>21</sub>), 15.2 (C<sub>20</sub>), 13.5 (C<sub>17</sub>), -5.0 (BCH<sub>3</sub>).

**FTIR (NaCl, thin film):** 3326, 2947, 1758, 1710, 1361, 1154, 1044, 1015, 747 cm<sup>-1</sup>.

**HRMS (MM:ESI-APCI):** calc'd for [M+H]<sup>+</sup> 772.3060, found 772.3066.

**[α]<sub>D</sub><sup>25</sup>:** -52° (c = 0.595, CHCl<sub>3</sub>).

**Table S1. Representative examples of unsuccessful pyrrole coupling attempts**

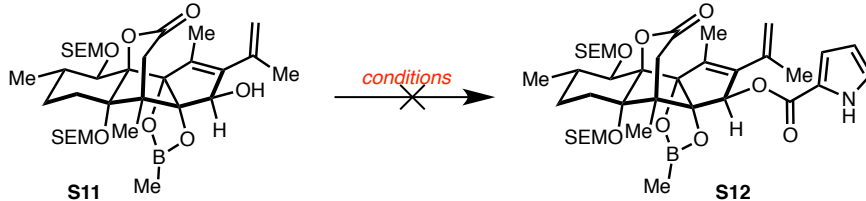

| entry | coupling partner | conditions                                                                                          | results            |
|-------|------------------|-----------------------------------------------------------------------------------------------------|--------------------|
| 1     | <b>P1</b>        | DMAP, DCC, THF/DCM, 24 h                                                                            | no reaction        |
| 2     | <b>P2</b>        | NaH, DMF, rt, 24 h                                                                                  | no reaction        |
| 3     | <b>P3</b>        | 2,4,6-trichlorobenzoyl chloride, Et <sub>3</sub> N, DMAP, PhMe, 24 h                                | no reaction        |
| 4     | <b>P3</b>        | 2-methyl-6-nitrobenzoic anhydride, Et <sub>3</sub> N, DMAP, CH <sub>2</sub> Cl <sub>2</sub> , 80 °C | no reaction        |
| 5     | <b>P4</b>        | NaH, DMAP, DMF, rt, 24h                                                                             | no reaction        |
| 6     | <b>P4</b>        | Et <sub>3</sub> N, DMAP, CH <sub>2</sub> Cl <sub>2</sub> , rt, 24h                                  | no reaction        |
| 7     | <b>P4</b>        | NaH, DMAP, DMF, 50 °C, 8 h                                                                          | translactonization |

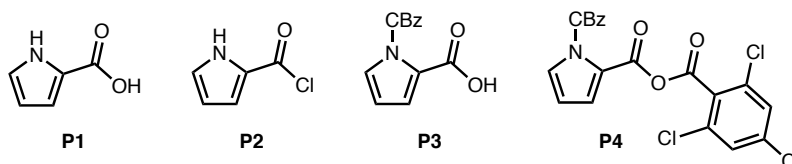

### Preparation of diol 17:

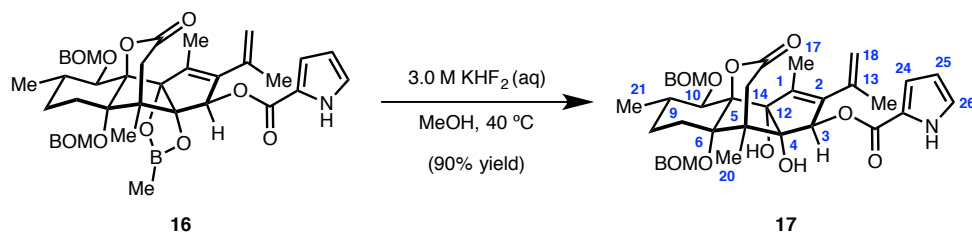

In slight modification of a procedure<sup>9</sup> detailed by Inoue and coworkers, pyrrole ester **16** (332 mg, 0.450 mmol, 1.0 equiv) was dissolved in MeOH (45 mL) and KHF<sub>2</sub> (3.0 M in H<sub>2</sub>O, 3 mL, 20 equiv) was then added. The resulting solution was warmed to 40 °C and stirring continued for 4 h at which point LCMS showed full consumption of the starting material. The reaction mixture was then cooled to ambient temperature and filtered through a plug of Na<sub>2</sub>SO<sub>4</sub> (18 g) and silica gel (18 g) to remove H<sub>2</sub>O and HF generated from KHF<sub>2</sub> (Note: If the reaction mixture was directly concentrated without filtration, the acidity of the reaction mixture resulted in the removal of the C<sub>10</sub> BOM group), washing with EtOAc to ensure complete elution of the desired product. The filtrate was concentrated *in vacuo* and the crude residue was purified by SiO<sub>2</sub> flash chromatography (40% EtOAc/hexanes) to afford free diol **17** as a white foam (288 mg, 0.403 mmol, 90% yield).

**TLC (40% EtOAc/hexanes):** R<sub>f</sub> 0.40 (UV, *p*-anisaldehyde).



**<sup>1</sup>H NMR (400 MHz, CDCl<sub>3</sub>):** δ 9.31 (s, 1H, **NH**), 7.45 – 7.29 (m, 10H, **PhCH<sub>2</sub>OCH<sub>2</sub>O**), 7.04 (td, *J* = 2.7, 1.4 Hz, 1H, C<sub>26</sub>), 6.90 (ddd, *J* = 3.8, 2.4, 1.5 Hz, 1H, C<sub>24</sub>), 6.30 (dt, *J* = 3.9, 2.5 Hz, 1H, C<sub>25</sub>), 6.26 (q, *J* = 2.3 Hz, 1H, C<sub>3</sub>), 5.19 (d, *J* = 6.3 Hz, 1H, **PhCH<sub>2</sub>OCH<sub>2</sub>O**), 5.10 (p, *J* = 1.6 Hz, 1H, C<sub>18</sub>), 4.94 (s, 2H, **PhCH<sub>2</sub>OCH<sub>2</sub>O**), 4.91 (d, *J* = 6.3 Hz, 1H, **PhCH<sub>2</sub>OCH<sub>2</sub>O**), 4.91 – 4.87 (m, 1H, C<sub>18</sub>), 4.83 (d, *J* = 12.2 Hz, 1H, **PhCH<sub>2</sub>OCH<sub>2</sub>O**), 4.71 (d, *J* = 8.0 Hz, 1H, **PhCH<sub>2</sub>OCH<sub>2</sub>O**), 4.69 (d, *J* = 8.0 Hz, 1H, **PhCH<sub>2</sub>OCH<sub>2</sub>O**), 4.65 (d, *J* = 12.2 Hz, 1H, **PhCH<sub>2</sub>OCH<sub>2</sub>O**), 4.43 (s, 1H, **OH**, C<sub>4OH</sub>), 4.05 (s, 1H, C<sub>12OH</sub>), 3.94 (d, *J* = 10.3 Hz, 1H, C<sub>10</sub>), 3.42 (d, *J* = 19.8 Hz, 1H, C<sub>14</sub>), 2.42 (d, *J* = 19.7 Hz, 1H, C<sub>14</sub>), 2.17 – 2.03 (m, 1H, C<sub>9</sub>), 1.94 (d, *J* = 2.4 Hz, 3H, C<sub>17</sub>), 1.83 (ddd, *J* = 14.4, 4.1, 1.9 Hz, 1H, C<sub>8</sub>), 1.75 (d, *J* = 1.2 Hz, 3H, C<sub>19</sub>), 1.67 (ddt, *J* = 10.3, 4.1, 1.5 Hz, 1H, C<sub>7</sub>), 1.62 – 1.52 (m, 1H, C<sub>8</sub>), 1.46 (td, *J* = 12.7, 4.1 Hz, 1H, C<sub>7</sub>), 1.13 (s, 3H, C<sub>20</sub>), 1.12 (d, *J* = 5.8 Hz, 3H, C<sub>21</sub>).

**<sup>13</sup>C NMR (101 MHz, CDCl<sub>3</sub>):** δ 168.2 (C<sub>15</sub>=O), 160.4 (C<sub>22</sub>=O), 140.9 (C<sub>2</sub>), 138.9 (C<sub>13</sub>), 137.7 (C<sub>Ph</sub>), 137.4 (C<sub>Ph</sub>), 136.6 (C<sub>1</sub>), 128.7 (C<sub>Ph</sub>), 128.4 (C<sub>Ph</sub>), 128.4 (C<sub>Ph</sub>), 128.2 (C<sub>Ph</sub>), 127.7 (C<sub>Ph</sub>), 127.7 (C<sub>Ph</sub>), 123.9 (C<sub>26</sub>), 121.9 (C<sub>23</sub>), 117.4 (C<sub>18</sub>), 115.8 (C<sub>24</sub>), 110.7 (C<sub>25</sub>), 97.3 (PhCH<sub>2</sub>OCH<sub>2</sub>O), 91.9 (C<sub>12</sub>), 91.4 (C<sub>4</sub>), 90.7 (C<sub>6</sub>), 90.3 (PhCH<sub>2</sub>OCH<sub>2</sub>O), 88.6 (C<sub>11</sub>), 82.9 (C<sub>3</sub>), 80.6 (C<sub>10</sub>), 71.9 (PhCH<sub>2</sub>OCH<sub>2</sub>O), 70.5 (PhCH<sub>2</sub>OCH<sub>2</sub>O), 49.3 (C<sub>5</sub>), 39.8 (C<sub>14</sub>), 33.2 (C<sub>9</sub>), 28.1 (C<sub>7</sub>), 21.1 (C<sub>19</sub>), 21.0 (C<sub>8</sub>), 18.9 (C<sub>21</sub>), 15.9 (C<sub>20</sub>), 13.2 (C<sub>17</sub>).

**FTIR (NaCl, thin film):** 3448, 2929, 1744, 1703, 1159, 1115, 1010 cm<sup>-1</sup>.

**HRMS (MM:ESI-APCI):** calc'd for [M+Na]<sup>+</sup> 736.3098, found 772.3099.

**[α]<sub>D</sub><sup>25</sup>:** -70° (*c* = 0.460, CHCl<sub>3</sub>).

### Preparation of anhydroryanodine (18):

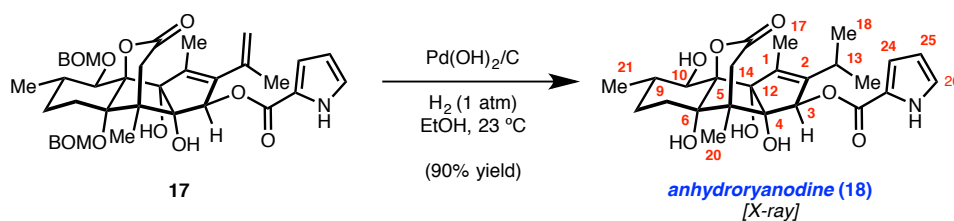

An oven-dried, 2 dram vial was charged with **17** (15 mg, 0.021 mmol, 1.0 equiv), Pd(OH)<sub>2</sub>/C (20 wt %, 23 mg), followed by absolute EtOH (2.1 mL). The suspension was sparged with N<sub>2</sub> for 3 min, then H<sub>2</sub> for 3 min via a three-walled balloon. The suspension was subsequently stirred for 1 h at ambient temperature under H<sub>2</sub>, then sparged with N<sub>2</sub> to remove excess H<sub>2</sub>, diluted with EtOAc (5 mL), filtered through a short pad of Celite, and concentrated *in vacuo*. Purification of the crude residue by SiO<sub>2</sub> flash chromatography (5% MeOH/CHCl<sub>3</sub>) afforded (+)-anhydroryanodine (**18**) as a white powder (9 mg, 0.019 mmol, 90% yield).

**TLC (5% MeOH/CHCl<sub>3</sub>):** R<sub>f</sub> 0.35 (UV, *p*-anisaldehyde).

**<sup>1</sup>H NMR (400 MHz, CD<sub>3</sub>OD):** δ 7.09 (dd, *J* = 2.6, 1.5 Hz, 1H, C<sub>26</sub>), 6.90 (dd, *J* = 3.8, 1.5 Hz, 1H, C<sub>24</sub>), 6.28 (dd, *J* = 3.8, 2.5 Hz, 1H, C<sub>25</sub>), 6.20 (q, *J* = 2.3 Hz, 1H, C<sub>3</sub>), 4.03 (d, *J* = 10.3 Hz, 1H, C<sub>10</sub>), 3.45 (d, *J* = 19.8 Hz, 1H, C<sub>14</sub>), 2.80 (p, *J* = 7.1 Hz, 1H, C<sub>13</sub>), 2.56 (d, *J* = 19.7 Hz, C<sub>14</sub>, 1H), 1.89 (d, *J* = 2.3 Hz, 3H, C<sub>17</sub>), 1.83 (td, *J* = 10.5, 5.8 Hz, 1H, C<sub>9</sub>), 1.66-1.58 (m, 2H, C<sub>7</sub>), 1.57-1.49 (m, 2H, C<sub>8</sub>), 1.12 (d, *J* = 7.0 Hz, 3H, C<sub>19</sub>), 1.11 (d, *J* = 7.0 Hz, 3H, C<sub>18</sub>), 1.01 (d, *J* = 7.0 Hz, 3H, C<sub>21</sub>), 0.99 (s, 3H, C<sub>20</sub>).

**<sup>13</sup>C NMR (101 MHz, CDCl<sub>3</sub>):** δ 172.3 (C<sub>15</sub>=O), 161.8 (C<sub>22</sub>=O), 144.6 (C<sub>2</sub>), 138.3 (C<sub>1</sub>), 125.8 (C<sub>26</sub>), 123.2 (C<sub>23</sub>), 117.0 (C<sub>24</sub>), 111.1 (C<sub>25</sub>), 94.0 (C<sub>12</sub>), 92.7 (C<sub>4</sub>), 90.2 (C<sub>6</sub>), 84.7 (C<sub>3</sub>), 84.2 (C<sub>11</sub>), 72.6 (C<sub>10</sub>), 40.5 (C<sub>14</sub>), 35.2 (C<sub>9</sub>), 28.7 (C<sub>7</sub>), 28.2 (C<sub>13</sub>), 26.3 (C<sub>8</sub>), 21.5 (C<sub>18</sub>/C<sub>19</sub>), 19.5 (C<sub>21</sub>), 18.8 (C<sub>18</sub>/C<sub>19</sub>), 14.3 (C<sub>20</sub>), 12.4 (C<sub>17</sub>).

**FTIR (NaCl, thin film):** 3408, 2963, 1740, 1690, 1409, 1315, 1165 cm<sup>-1</sup>.

**HRMS (MM:ESI-APCI):** calc'd for [M-H]<sup>-</sup> 474.2128, found 474.2112.

**[α]<sub>D</sub><sup>25</sup>:** +18° (*c* = 0.345, MeOH).

## Preparation of 19:

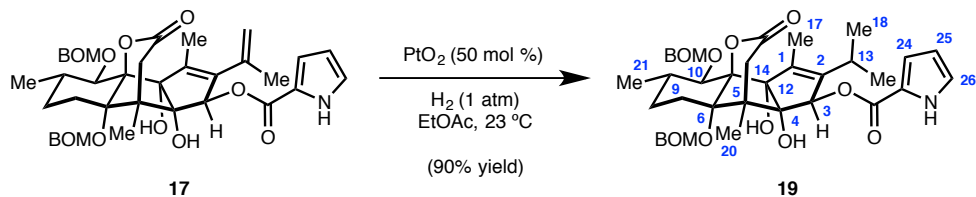

A 20 mL scintillation vial was charged with diene **17** (94 mg, 0.132 mmol, 1.0 equiv), PtO<sub>2</sub> (15 mg, 0.066 mmol, 0.5 equiv), followed by EtOAc (6 mL). The suspension was sparged with N<sub>2</sub> for 3 min, then H<sub>2</sub> for 3 min via a three-walled balloon. The suspension was subsequently stirred for 25 min at ambient temperature under H<sub>2</sub>, then sparged with N<sub>2</sub> to remove excess H<sub>2</sub>, diluted with EtOAc (5 mL), filtered through a short pad of Celite, and concentrated *in vacuo*. Purification of the crude residue by SiO<sub>2</sub> flash chromatography (40% EtOAc/hexane) afforded **19** (85 mg, 0.119 mmol, 90% yield) as a white foam.

**TLC (40% EtOAc/hexanes):** R<sub>f</sub> 0.40 (UV, *p*-anisaldehyde).

**<sup>1</sup>H NMR (400 MHz, CDCl<sub>3</sub>):** δ 9.29 (s, 1H, NH), 7.43 – 7.29 (m, 10H, PhCH<sub>2</sub>OCH<sub>2</sub>O), 7.07 (td, *J* = 2.7, 1.4 Hz, 1H, C<sub>26</sub>), 6.92 (ddd, *J* = 3.8, 2.4, 1.4 Hz, 1H, C<sub>24</sub>), 6.33 (dt, *J* = 3.8, 2.6 Hz, 1H, C<sub>25</sub>), 6.23 (q, *J* = 2.3 Hz, 1H, C<sub>3</sub>), 5.18 (d, *J* = 6.4 Hz, 1H, PhCH<sub>2</sub>OCH<sub>2</sub>O), 4.92 (d, *J* = 6.4 Hz, 1H, PhCH<sub>2</sub>OCH<sub>2</sub>O), 4.92 (s, 2H, PhCH<sub>2</sub>OCH<sub>2</sub>O), 4.83 (d, *J* = 12.2 Hz, 1H, PhCH<sub>2</sub>OCH<sub>2</sub>O), 4.71 (d, *J* = 12.0 Hz, 1H, PhCH<sub>2</sub>OCH<sub>2</sub>O), 4.67 (d, *J* = 12.0 Hz, 1H, PhCH<sub>2</sub>OCH<sub>2</sub>O), 4.65 (d, *J* = 12.2 Hz, 1H, PhCH<sub>2</sub>OCH<sub>2</sub>O), 4.39 (s, 1H, OH), 3.95 (s, 1H, OH), 3.92 (d, *J* = 10.4 Hz, 1H, C<sub>10</sub>), 3.41 (d, *J* = 19.7 Hz, 1H, C<sub>14</sub>), 2.80 (p, *J* = 7.0 Hz, 1H, C<sub>13</sub>), 2.39 (d, *J* = 19.7 Hz, 1H, C<sub>14</sub>), 2.18 – 2.03 (m, 1H, C<sub>9</sub>), 1.91 (d, *J* = 2.4 Hz, 3H, C<sub>17</sub>), 1.82 (dt, *J* = 13.2, 3.2 Hz, 1H, C<sub>8</sub>), 1.70-1.63 (m, 1H, C<sub>7</sub>), 1.60 – 1.51 (m, 1H, C<sub>7</sub>), 1.46 (td, *J* = 12.3, 3.6 Hz, 1H, C<sub>8</sub>), 1.13 (d, *J* = 7.0 Hz, 3H, C<sub>19</sub>), 1.12 (d, 1.08 *J* = 7.0 Hz, 3H, C<sub>21</sub>), 1.08 (s, 3H, C<sub>20</sub>), 1.00 (d, *J* = 7.0 Hz, 3H, C<sub>18</sub>).

**<sup>13</sup>C NMR (101 MHz, CDCl<sub>3</sub>):** δ 168.1 (C<sub>15</sub>=O), 160.4 (C<sub>22</sub>=O), 143.0 (C<sub>2</sub>), 137.7 (C<sub>Ph</sub>), 137.1 (C<sub>Ph</sub>), 136.6 (C<sub>1</sub>), 128.7 (C<sub>Ph</sub>), 128.4 (C<sub>Ph</sub>), 128.3 (C<sub>Ph</sub>), 128.2 (C<sub>Ph</sub>), 127.7 (C<sub>Ph</sub>), 127.7 (C<sub>Ph</sub>), 124.0 (C<sub>26</sub>), 122.1 (C<sub>23</sub>), 115.7 (C<sub>24</sub>), 110.9 (C<sub>25</sub>), 97.4 (PhCH<sub>2</sub>OCH<sub>2</sub>O), 92.0 (C<sub>12</sub>), 91.0 (C<sub>4</sub>), 90.8 (PhCH<sub>2</sub>OCH<sub>2</sub>O), 90.2 (C<sub>6</sub>), 88.5 (C<sub>11</sub>), 84.0 (C<sub>3</sub>), 80.7 (C<sub>10</sub>), 71.8 (PhCH<sub>2</sub>OCH<sub>2</sub>O), 70.5 (PhCH<sub>2</sub>OCH<sub>2</sub>O), 49.3 (C<sub>5</sub>), 39.9 (C<sub>14</sub>), 33.2 (C<sub>9</sub>), 28.0 (C<sub>7</sub>), 26.8 (C<sub>13</sub>), 21.2 (C<sub>18</sub>), 21.0 (C<sub>8</sub>), 19.0 (C<sub>19</sub>), 18.9 (C<sub>21</sub>), 15.9 (C<sub>20</sub>), 11.8 (C<sub>17</sub>).

**FTIR (NaCl, thin film):** 3455, 2927, 1744, 1708, 1159, 1026 cm<sup>-1</sup>.

**HRMS (MM:ESI-APCI):** calc'd for [M+Na]<sup>+</sup> 738.3254, found 738.3262.

[α]<sub>D</sub><sup>25</sup>: +36° (*c* = 0.380, CHCl<sub>3</sub>).

## Preparation of epoxide 20:

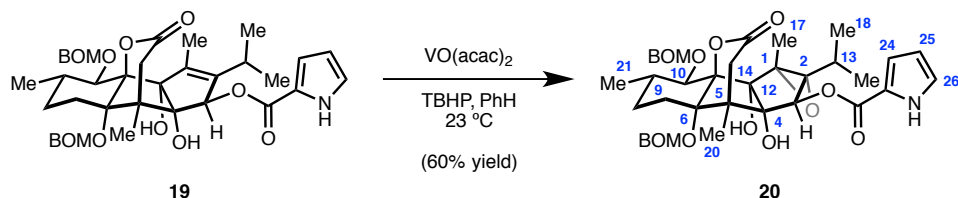

A 50 mL, oven-dried, round-bottomed flask was charged with **19** (144 mg, 0.201 mmol, 1.0 equiv), VO(acac)<sub>2</sub> (80 mg, 0.302 mmol, 1.5 equiv) and PhH (10.1 mL). The resulting green solution was stirred at ambient temperature for 5 min prior to the dropwise addition of TBHP (5.0-5.5 M in decane, 0.2 mL, 1.01 mmol, 5.0 equiv). The resulting dark-brown solution was stirred for 2 h at ambient temperature before additional TBHP (5.0-5.5 M in decane, 0.2 mL, 1.005 mmol, 5.0 equiv) was added to the reaction mixture. Stirring was continued

for 1 h until TLC analysis indicated complete consumption of starting material. The mixture was diluted with EtOAc (12 mL) and sat. aq. Na<sub>2</sub>S<sub>2</sub>O<sub>3</sub> (12 mL) was next slowly added. The two layers were separated, and the organic layer washed with sat. aq. Na<sub>2</sub>S<sub>2</sub>O<sub>3</sub> (2 x 12 mL) and sat. aq. NaHCO<sub>3</sub> (2 x 12 mL). The combined aqueous layers were extracted with EtOAc (2 x 6 mL), and the combined organic layers were washed with brine (6 mL), dried over Na<sub>2</sub>SO<sub>4</sub>, filtered, and concentrated *in vacuo*. The crude residue was purified by SiO<sub>2</sub> flash chromatography (30 to 40% EtOAc/hexanes) to afford epoxide **20** (88 mg, 0.120 mmol, 60% yield).

**TLC (40% EtOAc/hexanes):** R<sub>f</sub> 0.40 (UV, *p*-anisaldehyde).

**<sup>1</sup>H NMR (500 MHz, CDCl<sub>3</sub>):** δ 9.40 (s, 1H, **NH**), 7.42 – 7.29 (m, 10H, **PhCH<sub>2</sub>OCH<sub>2</sub>O**), 7.09 (td, *J* = 2.8, 1.4 Hz, 1H, C<sub>26</sub>), 6.93 (ddd, *J* = 3.8, 2.5, 1.4 Hz, 1H, C<sub>24</sub>), 6.35 (dt, *J* = 3.7, 2.6 Hz, 1H, C<sub>25</sub>), 5.76 (s, 1H, C<sub>3</sub>), 5.19 (d, *J* = 6.6 Hz, 1H, **PhCH<sub>2</sub>OCH<sub>2</sub>O**), 5.03 (d, *J* = 6.6 Hz, 1H, **PhCH<sub>2</sub>OCH<sub>2</sub>O**), 4.90 (d, *J* = 6.2 Hz, 1H, **PhCH<sub>2</sub>OCH<sub>2</sub>O**), 4.86 (d, *J* = 12.0 Hz, 1H, **PhCH<sub>2</sub>OCH<sub>2</sub>O**), 4.82 (d, *J* = 6.1 Hz, 1H, **PhCH<sub>2</sub>OCH<sub>2</sub>O**), 4.69 (d, *J* = 11.8 Hz, 1H, **PhCH<sub>2</sub>OCH<sub>2</sub>O**), 4.65 (d, *J* = 11.8 Hz, 1H, **PhCH<sub>2</sub>OCH<sub>2</sub>O**), 4.65 (d, *J* = 12.0 Hz, 1H, **PhCH<sub>2</sub>OCH<sub>2</sub>O**), 4.00 (d, *J* = 10.5 Hz, 1H, C<sub>10</sub>), 3.98 (d, *J* = 0.7 Hz, 1H, **OH**), 3.87 (d, *J* = 20.4 Hz, 1H, C<sub>14</sub>), 3.19 (s, 1H, **OH**), 2.56 (d, *J* = 20.3 Hz, 1H, C<sub>14</sub>), 2.18 – 2.07 (m, 1H, C<sub>9</sub>), 1.86 – 1.80 (m, 1H, C<sub>8</sub>), 1.77 (dd, *J* = 13.8, 6.6 Hz, 1H, C<sub>13</sub>), 1.71 (s, 3H, C<sub>17</sub>), 1.71-1.64 (m, 1H, C<sub>7</sub>), 1.62-1.53 (m, 1H, C<sub>8</sub>), 1.57 – 1.47 (m, 1H, C<sub>7</sub>), 1.22 (d, *J* = 7.4 Hz, 3H, C<sub>19</sub>), 1.16 (d, *J* = 6.5 Hz, 3H, C<sub>21</sub>), 1.02 (d, *J* = 7.0 Hz, 3H, C<sub>18</sub>), 1.00 (s, 3H, C<sub>20</sub>).

**<sup>13</sup>C NMR (126 MHz, CDCl<sub>3</sub>):** δ 168.1 (C<sub>15</sub>=O), 159.3 (C<sub>22</sub>=O), 137.9 (C<sub>Ph</sub>), 136.3 (C<sub>Ph</sub>), 128.6 (C<sub>Ph</sub>), 128.4 (C<sub>Ph</sub>), 128.3 (C<sub>Ph</sub>), 128.2 (C<sub>Ph</sub>), 127.7 (C<sub>Ph</sub>), 127.6 (C<sub>Ph</sub>), 124.6 (C<sub>26</sub>), 121.5 (C<sub>23</sub>), 115.8 (C<sub>24</sub>), 111.0 (C<sub>25</sub>), 97.6 (PhCH<sub>2</sub>OCH<sub>2</sub>O), 93.2 (C<sub>4</sub>), 91.2 (C<sub>6</sub>), 91.1 (C<sub>11</sub>), 90.6 (C<sub>12</sub>), 89.6 (PhCH<sub>2</sub>OCH<sub>2</sub>O), 81.3 (C<sub>10</sub>), 81.0 (C<sub>3</sub>), 76.2 (C<sub>1</sub>), 74.8 (C<sub>2</sub>), 71.3 (PhCH<sub>2</sub>OCH<sub>2</sub>O), 70.6 (PhCH<sub>2</sub>OCH<sub>2</sub>O), 50.3 (C<sub>5</sub>), 38.6 (C<sub>14</sub>), 32.6 (C<sub>9</sub>), 29.4 (C<sub>13</sub>), 27.9 (C<sub>7</sub>), 20.6 (C<sub>8</sub>), 18.9 (C<sub>21</sub>), 17.6 (C<sub>18</sub>), 17.2 (C<sub>19</sub>), 16.3 (C<sub>20</sub>), 14.5 (C<sub>17</sub>).

**FTIR (NaCl, thin film):** 3282, 2933, 1748, 1715, 1020 cm<sup>-1</sup>.

**HRMS (MM:ESI-APCI) :** calc'd for [M+Na]<sup>+</sup> 754.3203, found 738.3215.

**[α]<sub>D</sub><sup>25</sup> :** +40° (*c* = 0.450, CHCl<sub>3</sub>).

### Preparation of anhydroryanodine epoxide (**21**):

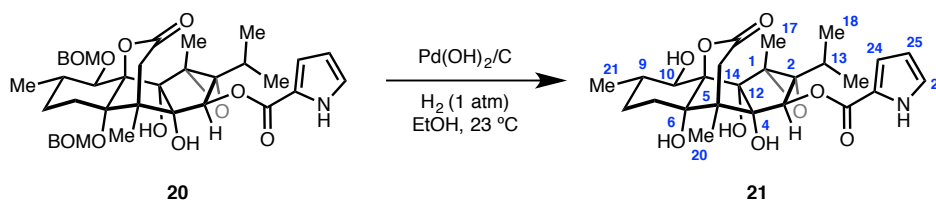

A 25 mL round-bottomed flask was charged with epoxide **20** (50 mg, 0.068 mmol, 1.0 equiv), Pd(OH)<sub>2</sub>/C (20 wt %, 75 mg), followed by absolute EtOH (6.8 mL). The suspension was sparged with N<sub>2</sub> for 3 min, then H<sub>2</sub> for 3 min via a three-walled balloon. The suspension was subsequently stirred for 3 h at ambient temperature under H<sub>2</sub>, then sparged with N<sub>2</sub> to remove excess H<sub>2</sub>, diluted with EtOAc (5 mL), filtered through a short pad of Celite, and concentrated *in vacuo*. The resulting white powder was used in the next step without further purification.

A sample of anhydroryanodine epoxide (**21**) was purified by preparative thin-layer chromatography (5% MeOH/CHCl<sub>3</sub>) for characterization purposes.

**TLC (10% MeOH/CHCl<sub>3</sub>):** R<sub>f</sub> 0.50 (UV, *p*-anisaldehyde).

**<sup>1</sup>H NMR (400 MHz, CD<sub>3</sub>OD):** δ 7.12 (dd, *J* = 2.5, 1.4 Hz, 1H, C<sub>26</sub>), 6.93 (dd, *J* = 3.8, 1.5 Hz, 1H, C<sub>24</sub>), 6.31 (dd, *J* = 3.8, 2.5 Hz, 1H, C<sub>25</sub>), 5.66 (s, 1H, C<sub>3</sub>), 4.09 (d, *J* = 10.5 Hz, 1H, C<sub>10</sub>), 3.90 (d, *J* = 20.4 Hz, 1H, C<sub>14</sub>), 2.75 (d, *J*

= 20.4 Hz, 1H, C<sub>14</sub>), 1.91 – 1.81 (m, 1H, C<sub>9</sub>), 1.77 (p, *J* = 7.2 Hz, 1H, C<sub>13</sub>), 1.68 (s, 3H, C<sub>17</sub>), 1.64 – 1.50 (m, 2H, C<sub>8</sub>), 1.62–1.49 (m, 2H, C<sub>7</sub>), 1.20 (d, *J* = 7.3 Hz, 3H, C<sub>19</sub>), 1.11 (d, *J* = 6.4 Hz, 3H, C<sub>21</sub>), 1.00 (d, *J* = 7.0 Hz, 3H, C<sub>18</sub>), 0.93 (s, 3H, C<sub>20</sub>).

**<sup>13</sup>C NMR (101 MHz, CD<sub>3</sub>OD):** δ 171.5 (C<sub>15</sub>=O), 160.8 (C<sub>22</sub>=O), 126.3 (C<sub>26</sub>), 122.6 (C<sub>23</sub>), 117.1 (C<sub>24</sub>), 111.3 (C<sub>25</sub>), 95.0 (C<sub>12</sub>), 92.6 (C<sub>4</sub>), 91.9 (C<sub>11</sub>), 85.2 (C<sub>6</sub>), 82.1 (C<sub>3</sub>), 77.3 (C<sub>1</sub>), 75.3 (C<sub>2</sub>), 72.9 (C<sub>10</sub>), 50.2 (C<sub>5</sub>), 39.4 (C<sub>14</sub>), 34.7 (C<sub>9</sub>), 30.6 (C<sub>13</sub>), 28.6 (C<sub>8</sub>), 25.9 (C<sub>7</sub>), 18.7 (C<sub>21</sub>), 18.2 (C<sub>19</sub>), 17.6 (C<sub>18</sub>), 15.5 (C<sub>17</sub>), 14.7 (C<sub>20</sub>).

**FTIR (NaCl, thin film):** 3419, 2967, 1749, 1707, 1402, 1324, 1128, 1085 cm<sup>-1</sup>.

**HRMS (MM:ESI-APCI):** calc'd for [M-H]<sup>-</sup> 490.2083, found 490.2103.

**[α]<sub>D</sub><sup>25</sup>:** +18° (*c* = 0.705, MeOH).

### Preparation of ryanodine (1):

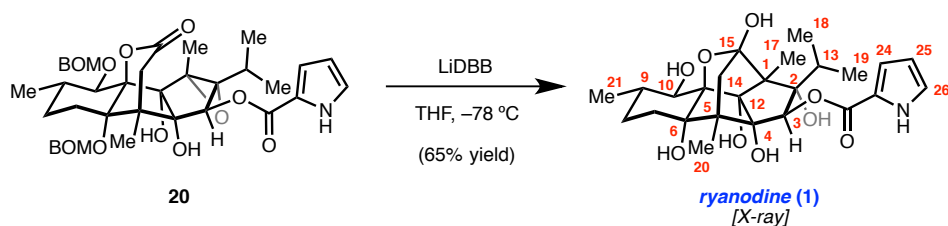

Fresh LiDBB<sup>10</sup> was prepared according to the following procedure: An oven-dried, 25 mL Schlenk tube containing a borosilicate glass-coated magnetic stirbar was charged with 4,4'-di-*tert*-butylbiphenyl (550 mg, 2.0 mmol) and freshly cut lithium wire (14.0 mg, 2.0 mmol) (Note: Immediately prior to use, lithium wire was washed with hexanes, hammered out into a foil, and cut into several small strips). The Schlenk tube was evacuated and refilled with Ar three times before anhydrous THF (12.5 mL) was added and the resulting reaction mixture was then cooled to 0 °C via an ice/water bath. After vigorously stirring (900–1000 rpm) at 0 °C for 10 min, the solution became a deep-green, characteristic of the DBB radical-anion. After the reaction mixture was stirred at 0 °C for approximately 4 h, the LiDBB solution (~0.16 M) was immediately used.

An oven-dried, 50 mL round-bottomed flask containing a borosilicate glass-coated magnetic stirbar was charged with epoxide **20** (64 mg, 0.087 mmol, 1.0 equiv) and anhydrous THF (4.3 mL) under Ar. The resulting solution was cooled to -78 °C via a dry ice/acetone bath. Freshly prepared LiDBB (0.16 M, 5.4 mL, 0.87 mmol, 10 equiv) was added dropwise via syringe along the side of the flask until the dark green color persisted. The deep green mixture was stirred for 0.5 h at -78 °C and then sat. aq. NH<sub>4</sub>Cl (10 mL) was added before the reaction mixture was warmed to ambient temperature. The organic layer was separated and the aqueous layer was extracted with CHCl<sub>3</sub> (3 x 10 mL). The combined organic layers were dried over Na<sub>2</sub>SO<sub>4</sub>, filtered, and concentrated *in vacuo*. The crude residue was purified by SiO<sub>2</sub> flash chromatography (0 to 5 to 10% MeOH/CHCl<sub>3</sub>) to afford ryanodine (**1**) as a white solid (28 mg, 0.057 mmol, 65% yield) (Note: The purification was made easier by first flushing with CHCl<sub>3</sub> (100 mL) until all of the excess 4,4'-di-*tert*-butylbiphenyl was removed).

**TLC (10% MeOH/CHCl<sub>3</sub>):** R<sub>f</sub> 0.33 (UV, *p*-anisaldehyde).

**<sup>1</sup>H NMR (600 MHz, CD<sub>3</sub>OD):** δ 7.04 (dd, *J* = 2.5, 1.5 Hz, 1H, C<sub>26</sub>), 6.88 (dd, *J* = 3.7, 1.5 Hz, 1H, C<sub>24</sub>), 6.24 (dd, *J* = 3.8, 2.5 Hz, 1H, C<sub>25</sub>), 5.64 (s, 1H, C<sub>3</sub>), 3.80 (d, *J* = 10.2 Hz, 1H, C<sub>10</sub>), 2.57 (d, *J* = 13.6 Hz, 1H, C<sub>14</sub>), 2.27 (h, *J* = 6.8 Hz, C<sub>13</sub>), 2.10 (td, *J* = 12.9, 5.2 Hz, 1H, C<sub>7</sub>), 1.94 (d, *J* = 13.6 Hz, 1H, C<sub>14</sub>), 1.85 (tdd, *J* = 10.2, 8.5, 5.6 Hz, 1H, C<sub>9</sub>), 1.54 (dtd, *J* = 12.4, 5.2, 1.8 Hz, 1H, C<sub>8</sub>), 1.48 (td, *J* = 13.0, 4.7 Hz, 1H, C<sub>8</sub>), 1.40 (s, 3H, C<sub>17</sub>), 1.26 (ddd, *J* = 12.7, 4.6, 2.0 Hz, 1H, C<sub>7</sub>), 1.12 (d, *J* = 6.7 Hz, 3H, C<sub>19</sub>), 1.02 (d, *J* = 6.5 Hz, 3H, C<sub>21</sub>), 0.90 (s, 3H, C<sub>20</sub>), 0.76 (d, *J* = 6.5 Hz, 3H, C<sub>18</sub>).

<sup>13</sup>C NMR (101 MHz, CD<sub>3</sub>OD): δ 161.8 (C<sub>22</sub>=O), 125.6 (C<sub>26</sub>), 123.3 (C<sub>23</sub>), 117.0 (C<sub>24</sub>), 110.9 (C<sub>25</sub>), 102.9 (C<sub>15</sub>), 96.7 (C<sub>12</sub>), 92.3 (C<sub>4</sub>), 90.8 (C<sub>3</sub>), 87.4 (C<sub>11</sub>), 86.5 (C<sub>6</sub>), 84.3 (C<sub>2</sub>), 72.8 (C<sub>10</sub>), 65.9 (C<sub>1</sub>), 49.6 (C<sub>5</sub>), 41.8 (C<sub>14</sub>), 35.4 (C<sub>9</sub>), 30.9 (C<sub>13</sub>), 29.3 (C<sub>8</sub>), 26.8 (C<sub>7</sub>), 19.5 (C<sub>19</sub>), 19.0 (C<sub>21</sub>), 18.9 (C<sub>18</sub>), 12.6 (C<sub>20</sub>), 10.2 (C<sub>17</sub>).

FTIR (NaCl, thin film): 3335, 2969, 1691, 1410, 1324, 1164, 988, 750 cm<sup>-1</sup>.

HRMS (MM:ESI-APCI): calc'd for [M-H]<sup>-</sup> 492.2239, found 492.2250.

[α]<sub>D</sub><sup>25</sup>: +15° (c = 0.705, MeOH).

Table 1, entry 2:

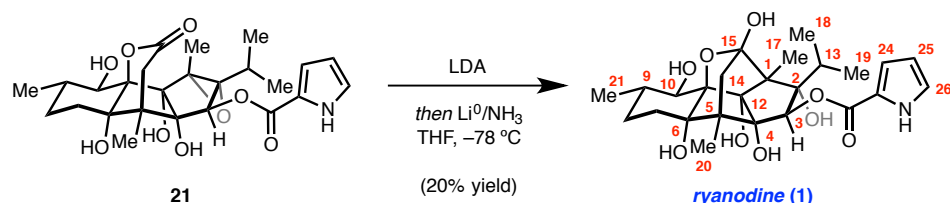

An oven-dried, 1 dram vial was charged with anhydroryanodine epoxide **21** (5 mg, 0.010 mmol, 1.0 equiv) and THF (1 mL). The solution was cooled to  $-78\text{ }^{\circ}\text{C}$  via a dry ice/acetone bath before a freshly prepared solution of LDA (1.0 M in THF, 60  $\mu\text{L}$ , 0.060 mmol, 5.9 equiv) was added. After 1 h of stirring at  $-78\text{ }^{\circ}\text{C}$ , the pale-yellow solution was transferred to a pre-cooled dark-blue solution of lithium (1.7 mg) in freshly distilled ammonia (3 mL) via syringe at  $-78\text{ }^{\circ}\text{C}$  and the resulting reaction mixture was stirred for 15 min. After the addition of solid ammonium chloride (50 mg), stirring was halted and the colorless reaction mixture was removed from the dry ice/acetone bath and warmed to ambient temperature over 45 min, resulting in the slow evaporation of ammonia. The residue was dissolved in water (1 mL) and extracted with CHCl<sub>3</sub> (3 x 2 mL). The combined organic layers were dried over Na<sub>2</sub>SO<sub>4</sub>, filtered, and concentrated *in vacuo*. The crude mixture was purified by preparative thin-layer chromatography (10% MeOH/CHCl<sub>3</sub>) to afford ryanodine (**1**) (1 mg, 0.002 mmol, 20% yield).

#### Preparation of enone **22**:

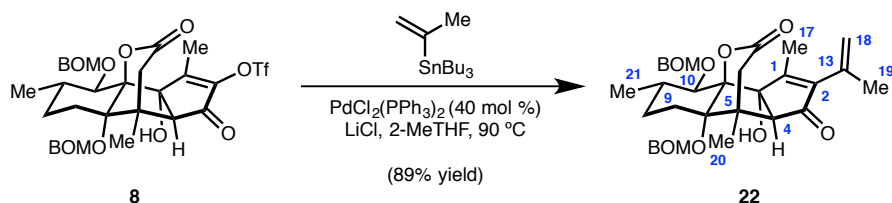

In a nitrogen-filled glovebox, an oven-dried, 20 mL scintillation vial was charged with vinyl triflate **8** (302 mg, 0.425 mmol, 1.0 equiv), PdCl<sub>2</sub>(PPh)<sub>3</sub> (119 mg, 0.170 mmol, 40 mol %), anhydrous LiCl (108 mg, 2.55 mmol, 6.0 equiv), tributyl(2-propenyl)stannane (422 mg, 1.27 mmol, 3.0 equiv), and anhydrous 2-methyltetrahydrofuran (6.4 mL). The vial was sealed with a Teflon-lined cap, and placed in a preheated heating block at 90 °C. After 14 h, the vial was removed from the heating block and allowed to cool to ambient temperature, then sat. aq. KF (10 mL) was added. The biphasic mixture was vigorously stirred for 45 min, then diluted with EtOAc (30 mL). The two layers were separated and the organic layer washed with additional sat. aq. KF (10 mL). The combined aqueous layers were extracted with EtOAc (2 x 30 mL), and the combined organic layers next washed with brine (20 mL), dried over Na<sub>2</sub>SO<sub>4</sub>, filtered over Celite, and concentrated *in vacuo* to afford an orange oil. Purification by SiO<sub>2</sub> flash chromatography (30 to 40 to 50% EtOAc/hexanes) afforded the desired product **22** as a pale yellow foam (228 mg, 0.378 mmol, 89% yield).

**TLC (40% EtOAc/hexanes):**  $R_f$  0.45 (UV, CAM).

**$^1\text{H}$  NMR (400 MHz,  $\text{CDCl}_3$ ):**  $\delta$  7.40 – 7.27 (m, 10H,  $\text{PhCH}_2\text{OCH}_2\text{O}$ ), 5.22 (p,  $J = 1.7$  Hz, 1H,  $\text{C}_{18}$ ), 5.07 (d,  $J = 5.4$  Hz, 1H,  $\text{PhCH}_2\text{OCH}_2\text{O}$ ), 5.02 (d,  $J = 6.7$  Hz, 1H,  $\text{PhCH}_2\text{OCH}_2\text{O}$ ), 4.97 (d,  $J = 6.7$  Hz, 1H,  $\text{PhCH}_2\text{OCH}_2\text{O}$ ), 4.84 (d,  $J = 5.4$  Hz, 1H,  $\text{PhCH}_2\text{OCH}_2\text{O}$ ), 4.79 (dd,  $J = 1.9, 1.0$  Hz, 1H,  $\text{C}_{18}$ ), 4.77 (d,  $J = 12.1$  Hz, 1H,  $\text{PhCH}_2\text{OCH}_2\text{O}$ ), 4.71 (d,  $J = 12.1$  Hz, 1H,  $\text{PhCH}_2\text{OCH}_2\text{O}$ ), 4.71 (d,  $J = 12.3$  Hz, 1H,  $\text{PhCH}_2\text{OCH}_2\text{O}$ ), 4.65 (d,  $J = 12.3$  Hz, 1H,  $\text{PhCH}_2\text{OCH}_2\text{O}$ ), 4.55 (s, 1H, OH), 4.00 (d,  $J = 10.5$  Hz, 1H,  $\text{C}_{10}$ ), 2.90 (d,  $J = 1.4$  Hz, 1H,  $\text{C}_4$ ), 2.36 (d,  $J = 19.6$  Hz, 1H,  $\text{C}_{14}$ ), 2.27 (dd,  $J = 19.6, 1.6$  Hz, 1H,  $\text{C}_{14}$ ), 2.20 (s, 3H,  $\text{C}_{17}$ ), 2.12 – 2.04 (m, 1H,  $\text{C}_9$ ), 1.96 – 1.89 (m, 1H,  $\text{C}_7$ ), 1.87 (t,  $J = 1.3$  Hz, 3H,  $\text{C}_{19}$ ), 1.62 (td,  $J = 7.7, 7.1, 3.1$  Hz, 2H,  $\text{C}_8$ ), 1.58 – 1.49 (m, 1H,  $\text{C}_7$ ), 1.28 (s, 3H,  $\text{C}_{20}$ ), 1.05 (d,  $J = 6.6$  Hz, 3H,  $\text{C}_{21}$ ).

**$^{13}\text{C}$  NMR (101 MHz,  $\text{CDCl}_3$ ):**  $\delta$  204.9 ( $\text{C}_3=\text{O}$ ), 169.6 ( $\text{C}_1$ ), 167.1 ( $\text{C}_{15}=\text{O}$ ), 145.9 ( $\text{C}_2$ ), 137.0 ( $\text{C}_{\text{Ph}}$ ), 136.8 ( $\text{C}_{\text{Ph}}$ ), 136.3 ( $\text{C}_{13}$ ), 128.7 ( $\text{C}_{\text{Ph}}$ ), 128.6 ( $\text{C}_{\text{Ph}}$ ), 128.6 ( $\text{C}_{\text{Ph}}$ ), 128.1 ( $\text{C}_{\text{Ph}}$ ), 128.1 ( $\text{C}_{\text{Ph}}$ ), 128.0 ( $\text{C}_{\text{Ph}}$ ), 127.7 ( $\text{C}_{\text{Ph}}$ ), 117.6 ( $\text{C}_{18}$ ), 97.0 ( $\text{PhCH}_2\text{OCH}_2\text{O}$ ), 91.5 ( $\text{C}_6$ ), 91.1 ( $\text{C}_{11}$ ), 89.7 ( $\text{PhCH}_2\text{OCH}_2\text{O}$ ), 89.3 ( $\text{C}_{12}$ ), 79.9 ( $\text{C}_{10}$ ), 71.0 ( $\text{PhCH}_2\text{OCH}_2\text{O}$ ), 70.3 ( $\text{PhCH}_2\text{OCH}_2\text{O}$ ), 66.0 ( $\text{C}_4$ ), 45.4 ( $\text{C}_5$ ), 39.2 ( $\text{C}_{14}$ ), 33.2 ( $\text{C}_9$ ), 27.9 ( $\text{C}_8$ ), 21.7 ( $\text{C}_{19}$ ), 21.1 ( $\text{C}_7$ ), 19.9 ( $\text{C}_{20}$ ), 18.5 ( $\text{C}_{21}$ ), 14.6 ( $\text{C}_{17}$ ).

**FTIR (NaCl, thin film):** 3387, 2928, 1748, 1698, 1027  $\text{cm}^{-1}$ .

**HRMS (MM:ESI-APCI):** calc'd for  $[\text{M}+\text{H}]^+$  603.2952, found 603.2959.

**$[\alpha]_D^{25}$ :** +100° ( $c = 0.200$ ,  $\text{CHCl}_3$ ).

### Preparation of TMS ether **S13**:

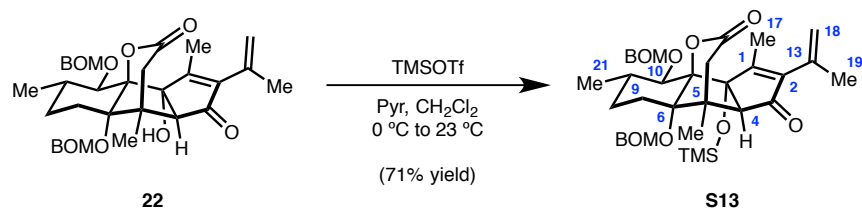

To an oven-dried, 100 mL round-bottomed flask was added enone **22** (944 mg, 1.57 mmol, 1.0 equiv), anhydrous  $\text{CH}_2\text{Cl}_2$  (31 mL), and freshly distilled pyridine (1.27 mL, 15.7 mmol, 10 equiv). The solution was cooled to 0 °C in an ice/water bath and TMSOTf (0.85 mL, 4.70 mmol, 3.0 equiv) was added via syringe. The ice/water bath was then removed and stirring was continued at ambient temperature. Additional portions of TMSOTf (0.85 mL, 4.70 mmol, 3.0 equiv) and pyridine (1.27 mL, 15.7 mmol, 10.0 equiv) were added every 12 h until TLC analysis indicated complete consumption of the starting material (*ca.* 36 h). The reaction mixture was next diluted with  $\text{CH}_2\text{Cl}_2$  (15 mL) and carefully quenched with the addition of sat. aq.  $\text{NaHCO}_3$  (30 mL). The two layers were separated and the aqueous layer was extracted with  $\text{CH}_2\text{Cl}_2$  (3 x 30 mL). The combined organic layers were washed with brine (15 mL), dried over  $\text{Na}_2\text{SO}_4$ , filtered and concentrated *in vacuo*. The crude residue was purified by  $\text{SiO}_2$  flash chromatography (20 to 30 to 35% EtOAc/hexanes) to afford TMS ether **S13** (750 mg, 1.11 mmol, 71% yield) as a colorless foam.

**TLC (30% EtOAc/hexanes):**  $R_f$  0.34 (UV, CAM).

**$^1\text{H}$  NMR (400 MHz,  $\text{CDCl}_3$ ):**  $\delta$  7.39 – 7.28 (m, 10H,  $\text{PhCH}_2\text{OCH}_2\text{O}$ ), 5.24 (p,  $J = 1.6$  Hz, 1H,  $\text{C}_{18}$ ), 5.08 (d,  $J = 7.0$  Hz, 1H,  $\text{PhCH}_2\text{OCH}_2\text{O}$ ), 5.01 (s, 2H,  $\text{PhCH}_2\text{OCH}_2\text{O}$ ), 4.92 (d,  $J = 7.0$  Hz,  $\text{PhCH}_2\text{OCH}_2\text{O}$ ), 4.84 (d,  $J = 11.9$  Hz, 1H,  $\text{PhCH}_2\text{OCH}_2\text{O}$ ), 4.81 (d,  $J = 10.9$  Hz,  $\text{PhCH}_2\text{OCH}_2\text{O}$ ), 4.79 (s, 1H,  $\text{C}_{18}$ ), 4.60 (d,  $J = 11.9$  Hz, 1H,  $\text{PhCH}_2\text{OCH}_2\text{O}$ ), 4.57 (d,  $J = 10.9$  Hz, 1H,  $\text{PhCH}_2\text{OCH}_2\text{O}$ ), 4.02 (d,  $J = 10.5$  Hz, 1H,  $\text{C}_{10}$ ), 3.00 (s, 1H,  $\text{C}_4$ ), 2.33 (d,  $J = 19.5$  Hz, 1H,  $\text{C}_{14}$ ), 2.27 (d,  $J = 19.5$  Hz, 1H,  $\text{C}_{14}$ ), 2.20 (s, 3H,  $\text{C}_{17}$ ), 2.14 – 2.00 (m, 1H,  $\text{C}_9$ ), 1.99 – 1.90 (m, 1H,  $\text{C}_7$ ), 1.88 (t,  $J = 1.2$  Hz, 3H,  $\text{C}_{19}$ ), 1.78 (qd,  $J = 13.0, 4.2$  Hz, 1H,  $\text{C}_8$ ), 1.71– 1.58 (m, 1H,  $\text{C}_8$ ), 1.56 – 1.44 (m, 1H,  $\text{C}_7$ ), 1.22 (s, 3H,  $\text{C}_{20}$ ), 1.15 (d,  $J = 6.5$  Hz, 3H,  $\text{C}_{21}$ ), 0.11 (s, 9H, TMS).

<sup>13</sup>C NMR (101 MHz, CDCl<sub>3</sub>): δ 205.0 (C<sub>3</sub>=O), 170.8 (C<sub>1</sub>), 167.3 (C<sub>15</sub>=O), 145.6 (C<sub>2</sub>), 137.9 (C<sub>Ph</sub>), 137.0 (C<sub>Ph</sub>), 136.1 (C<sub>13</sub>), 128.6 (C<sub>Ph</sub>), 128.4 (C<sub>Ph</sub>), 128.0 (C<sub>Ph</sub>), 127.7 (C<sub>Ph</sub>), 127.7 (C<sub>Ph</sub>), 127.6 (C<sub>Ph</sub>), 117.5 (C<sub>18</sub>), 98.1 (PhCH<sub>2</sub>OCH<sub>2</sub>O), 92.9 (C<sub>11</sub>), 91.7 (C<sub>12</sub>), 91.0 (C<sub>6</sub>), 89.9 (PhCH<sub>2</sub>OCH<sub>2</sub>O), 81.7 (C<sub>10</sub>), 70.5 (PhCH<sub>2</sub>OCH<sub>2</sub>O), 65.1 (C<sub>4</sub>), 46.6 (C<sub>5</sub>), 39.2 (C<sub>14</sub>), 32.9 (C<sub>9</sub>), 27.9 (C<sub>8</sub>), 21.5 (C<sub>19</sub>), 21.1 (C<sub>7</sub>), 20.4 (C<sub>20</sub>), 19.0 (C<sub>21</sub>), 14.7 (C<sub>17</sub>), 1.9 (Si(Me)<sub>3</sub>).

FTIR (NaCl, thin film): 2954, 1751, 1699, 1025 cm<sup>-1</sup>.

HRMS (MM:ESI-APCI): calc'd for [M+H]<sup>+</sup> 675.3348, found 675.3349.

[α]<sub>D</sub><sup>25</sup>: +124° (c = 0.245, CHCl<sub>3</sub>).

### Preparation of alcohol **23**:

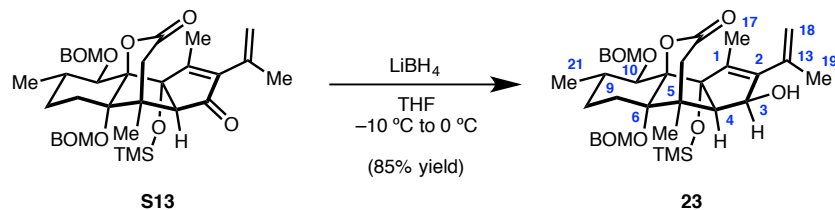

To an oven-dried, 100 mL round-bottomed flask was added enone **S13** (749 mg, 1.11 mmol, 1.0 equiv) and anhydrous THF (22 mL). The solution was cooled to -10 °C in an ice/acetone bath and solid LiBH<sub>4</sub> (121 mg, 5.55 mmol, 5.0 equiv) was added. After 1 h, a second portion of solid LiBH<sub>4</sub> (121 mg, 5.55 mmol, 5.0 equiv) was added before warming the reaction mixture to 0 °C with an ice/water bath. Stirring was continued at 0 °C for 1 h after which a third portion of solid LiBH<sub>4</sub> (121 mg, 5.55 mmol, 5.0 equiv) was added at 0 °C. The reaction was allowed to stir at 0 °C an additional 1 h before sat. aq. NH<sub>4</sub>Cl (35 mL) was *slowly* added to the reaction. The mixture was diluted with EtOAc (15 mL), the two layers separated, and the organic layer washed with an additional portion of sat. aq. NH<sub>4</sub>Cl (35 mL). The combined aqueous layers were extracted with EtOAc (3 x 40 mL), and the combined organic layers next dried over Na<sub>2</sub>SO<sub>4</sub>, filtered, and concentrated *in vacuo*. The crude residue was purified by SiO<sub>2</sub> flash chromatography (30 to 40 to 50% EtOAc/hexanes) to afford the desired product **23** as a colorless foam (635 mg, 0.94 mmol, 85% yield).

TLC (40% EtOAc/hexanes): R<sub>f</sub> 0.37 (UV, *p*-anisaldehyde).

<sup>1</sup>H NMR (400 MHz, CDCl<sub>3</sub>): δ 7.37 – 7.27 (m, 10H, PhCH<sub>2</sub>OCH<sub>2</sub>O), 5.21 (p, *J* = 1.7 Hz, 1H, C<sub>18</sub>), 5.22 – 5.19 (m, 1H, C<sub>3</sub>), 5.02 (d, *J* = 6.6 Hz, 1H, PhCH<sub>2</sub>OCH<sub>2</sub>O), 4.97 (d, *J* = 7.9 Hz, 1H, PhCH<sub>2</sub>OCH<sub>2</sub>O), 4.95 (d, *J* = 7.9 Hz, 1H, PhCH<sub>2</sub>OCH<sub>2</sub>O), 4.92 (d, *J* = 6.6 Hz, 1H, PhCH<sub>2</sub>OCH<sub>2</sub>O), 4.90 (dd, *J* = 2.0, 1.0 Hz, 1H, C<sub>18</sub>), 4.84 (d, *J* = 11.9 Hz, 1H, PhCH<sub>2</sub>OCH<sub>2</sub>O), 4.78 (d, *J* = 11.6 Hz, 1H, PhCH<sub>2</sub>OCH<sub>2</sub>O), 4.61 (d, *J* = 11.6 Hz, 1H, PhCH<sub>2</sub>OCH<sub>2</sub>O), 4.55 (d, *J* = 11.9 Hz, 1H, PhCH<sub>2</sub>OCH<sub>2</sub>O), 3.95 (d, *J* = 10.4 Hz, 1H, C<sub>10</sub>), 3.33 (d, *J* = 19.6 Hz, 1H, C<sub>14</sub>), 3.06 (dd, *J* = 8.0, 1.4 Hz, 1H, C<sub>4</sub>), 2.17 (dd, *J* = 19.6, 1.4 Hz, 1H, C<sub>14</sub>), 2.11 – 1.98 (m, 1H, C<sub>9</sub>), 1.88 (t, *J* = 1.2 Hz, 3H, C<sub>19</sub>), 1.89 – 1.86 (m, 1H, C<sub>7</sub>), 1.81 (d, *J* = 2.2 Hz, 3H, C<sub>17</sub>), 1.73 (d, *J* = 3.2 Hz, 1H, OH), 1.70 – 1.59 (m, 2H, C<sub>8</sub>), 1.56 – 1.45 (m, 1H, C<sub>7</sub>), 1.20 (s, 3H, C<sub>20</sub>), 1.14 (d, *J* = 6.5 Hz, 3H, C<sub>21</sub>), 0.10 (s, 9H, TMS).

<sup>13</sup>C NMR (101 MHz, CDCl<sub>3</sub>): δ 169.4 (C<sub>15</sub>=O), 146.3 (C<sub>1</sub>), 139.0 (C<sub>2</sub>), 138.2 (C<sub>Ph</sub>), 138.0 (C<sub>13</sub>), 137.3 (C<sub>Ph</sub>), 128.5 (C<sub>Ph</sub>), 128.3 (C<sub>Ph</sub>), 127.9 (C<sub>Ph</sub>), 127.8 (C<sub>Ph</sub>), 127.7 (C<sub>Ph</sub>), 127.4 (C<sub>Ph</sub>), 116.7 (C<sub>18</sub>), 98.2 (PhCH<sub>2</sub>OCH<sub>2</sub>O), 97.2 (C<sub>12</sub>), 93.0 (C<sub>11</sub>), 89.5 (C<sub>6</sub>), 89.3 (PhCH<sub>2</sub>OCH<sub>2</sub>O), 82.3 (C<sub>10</sub>), 74.5 (C<sub>3</sub>), 70.3 (PhCH<sub>2</sub>OCH<sub>2</sub>O), 70.1 (PhCH<sub>2</sub>OCH<sub>2</sub>O), 58.0 (C<sub>4</sub>), 47.1 (C<sub>5</sub>), 39.2 (C<sub>14</sub>), 33.3 (C<sub>9</sub>), 28.0 (C<sub>8</sub>), 21.4 (C<sub>19</sub>), 21.2 (C<sub>20</sub>), 20.3 (C<sub>7</sub>), 19.1 (C<sub>21</sub>), 12.7 (C<sub>17</sub>), 1.8 (Si(Me)<sub>3</sub>).

FTIR (NaCl, thin film): 3459, 2954, 1716, 1026 cm<sup>-1</sup>.

HRMS (MM:ESI-APCI): calc'd for [M+Na]<sup>+</sup> 699.3324, found 699.3325.

[α]<sub>D</sub><sup>25</sup>: -17° (c = 0.275, CHCl<sub>3</sub>).

## Preparation of TBS-protected pyrrole 24:

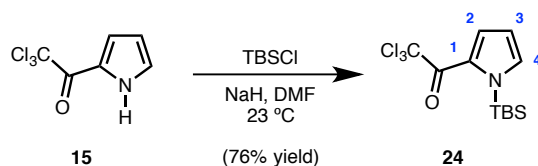

To a 100 mL, oven-dried flask was added NaH (dry, 339 mg, 14.1 mmol, 1.0 equiv) in a nitrogen-filled glovebox. The flask was capped with a rubber septum, removed from the glovebox, and anhydrous DMF (12 mL) was then added. The resulting slurry was cooled to 0 °C in an ice/water bath and after 15 min, 2-(trichloroacetyl)pyrrole (3.0 g, 14.1 mmol, 1.0 equiv) in anhydrous DMF (12 mL) was added dropwise by cannula transfer over 10 min. [Caution! Rapid generation of H<sub>2</sub> gas. A vent needle was routinely used to prevent over-pressurization.] Upon complete addition, the reaction mixture was warmed to ambient temperature and stirring was continued for another 30 min before TBSCl (2.55 g, 16.9 mmol, 1.2 equiv) in anhydrous DMF (12 mL) was added dropwise by cannula transfer over 10 min, during which time the yellow-brown solution fades to a pale pink slurry. The reaction was continued for 30 min then diluted with Et<sub>2</sub>O (50 mL) and carefully quenched with the addition of sat. aq. NH<sub>4</sub>Cl (50 mL). The layers were separated and the aqueous layer next extracted with Et<sub>2</sub>O (2 x 50 mL). The combined organic layers were washed with H<sub>2</sub>O (30 mL), brine (30 mL), then dried over anhydrous MgSO<sub>4</sub>, filtered, and concentrated *in vacuo* to afford an orange oil. Purification by SiO<sub>2</sub> flash chromatography (1 to 2 to 3% Et<sub>2</sub>O/hexanes) afforded TBS-protected pyrrole **24** as a thick, slightly yellow oil (3.52 g, 10.8 mmol, 76% yield) that solidifies to a colorless solid upon cooling to -20 °C.

**TLC (2% Et<sub>2</sub>O/hexanes):** R<sub>f</sub> 0.44 (UV, *p*-anisaldehyde).

**<sup>1</sup>H NMR (400 MHz, CDCl<sub>3</sub>):** δ 7.68 (dd, *J* = 4.0, 1.3 Hz, 1H, C<sub>2</sub>), 7.27 (dd, *J* = 2.5, 1.3 Hz, 1H, C<sub>4</sub>), 6.40 (dd, *J* = 3.9, 2.5 Hz, 1H, C<sub>3</sub>), 0.95 (s, 9H, Si(*t*-Bu)Me<sub>2</sub>), 0.54 (s, 6H, Si(*t*-Bu)Me<sub>2</sub>).

**<sup>13</sup>C NMR (125 MHz, CDCl<sub>3</sub>):** δ 172.8 (C=O), 136.7 (C<sub>4</sub>), 127.9 (C<sub>1</sub>), 126.8 (C<sub>2</sub>), 112.1 (C<sub>3</sub>), 96.1 (CCl<sub>3</sub>), 27.3 (Si-C(CH<sub>3</sub>)<sub>3</sub>), 19.6 (Si-C(CH<sub>3</sub>)<sub>3</sub>), -1.4 (Si(CH<sub>3</sub>)<sub>2</sub>).

**FTIR (NaCl, thin film):** 2954, 2932, 2896, 2860, 1677 cm<sup>-1</sup>.

**HRMS:** calc'd for [M-H]<sup>-</sup> 324.0150, found 324.0153.

## Preparation of chloride 25:

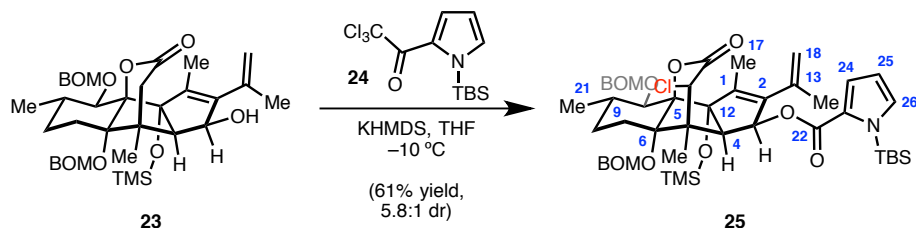

In a nitrogen-filled glovebox, an oven-dried, 50 mL round-bottomed flask was charged with solid KHMDS (95%, 388 mg, 1.85 mmol, 2.0 equiv). The flask was capped with a rubber septum, removed from the glovebox, and anhydrous THF (3.7 mL) was added. The resulting mixture was stirred at ambient temperature for 10-15 min to ensure complete dissolution of the solid, then cooled to -10 °C in an ice/acetone bath and stirring continued for 15 min before adding alcohol **23** (625 mg, 0.92 mmol, 1.0 equiv) in anhydrous THF (7.0 mL) (Note: alcohol **23** was azeotroped with PhH three times immediately prior to use) dropwise via syringe before another portion of THF (1.2 mL) was used to render the transfer quantitative. The pale-yellow reaction mixture was stirred an additional 10 min at -10 °C before TBS-protected pyrrole **24** (754 mg, 2.31 mmol, 2.5 equiv) in



anhydrous THF (4.1 mL) was added dropwise via syringe (Note: pyrrole **24** was azeotroped with PhH three times immediately prior to use). The resulting dark pink-orange reaction mixture was allowed 20 min at  $-10\text{ }^{\circ}\text{C}$  then quenched with the addition of sat. aq.  $\text{NH}_4\text{Cl}$  (5 mL), warmed to ambient temperature, and diluted with EtOAc (5 mL). The two layers were separated and the aqueous layer was extracted with EtOAc (3 x 10 mL). The combined organic layers were washed with brine (5 mL), dried over  $\text{Na}_2\text{SO}_4$ , filtered, and concentrated *in vacuo*. Purification of the crude residue by  $\text{SiO}_2$  flash chromatography (5 to 10 to 15% EtOAc/hexanes) afforded a 5.8:1 inseparable diastereomeric mixture of chloride **25** as a yellow-orange foam (515 mg, 0.56 mmol, 61% yield).

An analytical sample of the major diastereomer of chloride **25** was obtained by a second round of purification via  $\text{SiO}_2$  flash chromatography (1.5% EtOAc/ $\text{CH}_2\text{Cl}_2$ ). The stereochemistry of the major diastereomer of the chloride substituted  $\text{C}_{14}\text{-H}$  was determined by nOe analysis.

**TLC (10% EtOAc/hexanes):**  $R_f$  0.32 (UV, *p*-anisaldehyde).

**$^1\text{H}$  NMR (400 MHz,  $\text{CDCl}_3$ ):**  $\delta$  7.38 – 7.33 (m, 10H,  $\text{PhCH}_2\text{OCH}_2\text{O}$ ), 7.11 (s, 1H,  $\text{C}_{26}$ ), 7.10 (s, 1H,  $\text{C}_{24}$ ), 6.38 (dd,  $J = 7.8, 2.4$  Hz, 1H,  $\text{C}_3$ ), 6.30 (t,  $J = 3.1$  Hz, 1H,  $\text{C}_{25}$ ), 5.26 (s, 1H,  $\text{C}_{14}$ ), 5.10 (s, 1H,  $\text{C}_{18}$ ), 5.00 (d,  $J = 6.5$  Hz, 1H,  $\text{PhCH}_2\text{OCH}_2\text{O}$ ), 4.99 (d,  $J = 6.3$  Hz, 1H,  $\text{PhCH}_2\text{OCH}_2\text{O}$ ), 4.96 (d,  $J = 6.4$  Hz, 1H,  $\text{PhCH}_2\text{OCH}_2\text{O}$ ), 4.89 (d,  $J = 6.6$  Hz, 1H,  $\text{PhCH}_2\text{OCH}_2\text{O}$ ), 4.87 (dd,  $J = 1.9, 1.0$  Hz, 1H,  $\text{C}_{18}$ ), 4.84 (d,  $J = 11.9$  Hz, 1H,  $\text{PhCH}_2\text{OCH}_2\text{O}$ ), 4.76 (d,  $J = 11.5$  Hz, 1H,  $\text{PhCH}_2\text{OCH}_2\text{O}$ ), 4.62 (d,  $J = 11.5$  Hz, 1H,  $\text{PhCH}_2\text{OCH}_2\text{O}$ ), 4.58 (d,  $J = 11.9$  Hz, 1H,  $\text{PhCH}_2\text{OCH}_2\text{O}$ ), 3.96 (d,  $J = 10.4$  Hz, 1H,  $\text{C}_{10}$ ), 3.43 (d,  $J = 7.9$  Hz, 1H,  $\text{C}_4$ ), 2.04 (m, 1H,  $\text{C}_9$ ), 2.00 – 1.96 (m, 2H,  $\text{C}_7$ ), 1.86 (d,  $J = 2.3$  Hz, 3H,  $\text{C}_{17}$ ), 1.73 (s, 3H,  $\text{C}_{19}$ ), 1.66 – 1.59 (m, 2H,  $\text{C}_8$ ), 1.21 (s, 3H,  $\text{C}_{20}$ ), 1.15 (d,  $J = 6.5$  Hz, 3H,  $\text{C}_{21}$ ), 0.93 (s, 9H,  $\text{Si}(t\text{-Bu})\text{Me}_2$ ), 0.53 (s, 3H,  $\text{Si}(t\text{-Bu})\text{Me}_2$ ), 0.52 (s, 3H,  $\text{Si}(t\text{-Bu})\text{Me}_2$ ), 0.17 (s, 9H, TMS).

**$^{13}\text{C}$  NMR (101 MHz,  $\text{CDCl}_3$ ):**  $\delta$  166.3 ( $\text{C}_{15}=\text{O}$ ), 160.0 ( $\text{C}_{22}=\text{O}$ ), 145.0 ( $\text{C}_2$ ), 139.4 ( $\text{C}_1$ ), 138.0 ( $\text{C}_{\text{Ph}}$ ), 137.4 ( $\text{C}_{13}$ ), 137.1 ( $\text{C}_{\text{Ph}}$ ), 133.4 ( $\text{C}_{24}$ ), 128.6 ( $\text{C}_{\text{Ph}}$ ), 128.4 ( $\text{C}_{\text{Ph}}$ ), 128.0 ( $\text{C}_{\text{Ph}}$ ), 127.8 ( $\text{C}_{\text{Ph}}$ ), 127.8 ( $\text{C}_{\text{Ph}}$ ), 127.5 ( $\text{C}_{\text{Ph}}$ ), 127.2 ( $\text{C}_{23}$ ), 121.9 ( $\text{C}_{26}$ ), 117.5 ( $\text{C}_{18}$ ), 111.3 ( $\text{C}_{25}$ ), 98.3 ( $\text{PhCH}_2\text{OCH}_2\text{O}$ ), 96.6 ( $\text{C}_{12}$ ), 94.1 ( $\text{C}_{11}$ ), 89.5 ( $\text{PhCH}_2\text{OCH}_2\text{O}$ ), 88.7 ( $\text{C}_6$ ), 82.1 ( $\text{C}_{10}$ ), 73.4 ( $\text{C}_3$ ), 70.4 ( $\text{PhCH}_2\text{OCH}_2\text{O}$ ), 70.3 ( $\text{PhCH}_2\text{OCH}_2\text{O}$ ), 58.5 ( $\text{C}_4$ ), 58.2 ( $\text{C}_{14}$ ), 51.7 ( $\text{C}_5$ ), 33.6 ( $\text{C}_9$ ), 28.1 ( $\text{C}_8$ ), 27.1 ( $\text{Si}(t\text{-Bu})\text{Me}_2$ ), 22.5 ( $\text{C}_7$ ), 20.6 ( $\text{C}_{19}$ ), 20.0 ( $\text{C}_{20}$ ), 19.3 ( $\text{Si}-\text{C}(\text{CH}_3)_3$ ), 19.1 ( $\text{C}_{21}$ ), 12.9 ( $\text{C}_{17}$ ), 1.8 (TMS),  $-1.9$  ( $\text{Si}(t\text{-Bu})\text{Me}_2$ ),  $-1.9$  ( $\text{Si}(t\text{-Bu})\text{Me}_2$ ).

**FTIR (NaCl, thin film):** 2953, 2930, 1754, 1715, 1262, 1150  $\text{cm}^{-1}$ .

**HRMS:** calc'd for  $[\text{M}+\text{NH}_4]^+$  935.4458, found 935.4459.

**$[\alpha]_D^{25}$ :**  $-69^{\circ}$  ( $c = 0.840$ ,  $\text{CHCl}_3$ ).

**Table S2. Optimization of acylation of C3-alcohol 23**

| entry | base   | equiv     | temperature                                                 | major product      | isolated yield                        |
|-------|--------|-----------|-------------------------------------------------------------|--------------------|---------------------------------------|
| 1     | NaHMDS | 1.1 equiv | $-78\text{ }^{\circ}\text{C}$                               | translactonization | 28% (desired <b>26</b> )              |
| 2     | LHMDS  | 1.1 equiv | $-78\text{ }^{\circ}\text{C}$                               | SM <b>23</b>       | 0%                                    |
| 3     | KHMDS  | 1.1 equiv | $-78\text{ }^{\circ}\text{C}$                               | SM <b>23</b>       | trace                                 |
| 4     | NaHMDS | 1.5 equiv | $-60\text{ }^{\circ}\text{C}$                               | translactonization | 25% (desired <b>26</b> )              |
| 5     | NaHMDS | 1.5 equiv | $-40\text{ }^{\circ}\text{C}$                               | translactonization | 28% (desired <b>26</b> )              |
| 6     | NaHMDS | 1.2 equiv | $-10\text{ }^{\circ}\text{C}$                               | translactonization | 20% (chloride <b>25</b> )             |
| 7     | NaHMDS | 2.0 equiv | $-10\text{ }^{\circ}\text{C}$                               | translactonization | 18% (chloride <b>25</b> )             |
| 8     | KHMDS  | 2.0 equiv | $-10\text{ }^{\circ}\text{C}$                               | chloride <b>25</b> | 69% (chloride <b>25</b> )             |
| 9     | KHMDS  | 1.2 equiv | $-10\text{ }^{\circ}\text{C}$                               | chloride <b>25</b> | 20% ( <b>26</b> ) + 45% ( <b>25</b> ) |
| 10    | LHMDS  | 2.0 equiv | $-10\text{ }^{\circ}\text{C}$                               | SM <b>23</b>       | 0%                                    |
| 11    | NaH    | 2.0 equiv | $0\text{ }^{\circ}\text{C}$ to $23\text{ }^{\circ}\text{C}$ | TMS deprotect.     | 10% (desired-TMS)                     |
| 12    | NaH    | 4.0 equiv | $0\text{ }^{\circ}\text{C}$ to $23\text{ }^{\circ}\text{C}$ | TMS deprotect.     | 12% (desired-TMS)                     |

*lower temperatures avoid chlorination, but suffer from poor conversion and large amounts of translactonization*  
*higher temperatures favor chlorination, very short reaction times (10-15 min), lowering equiv avoids chlorination to a degree, but allowing reaction to run even 5-10 additional mins leads to clean conversion to chloride **25***

## Preparation of pyrrole ester **26**:

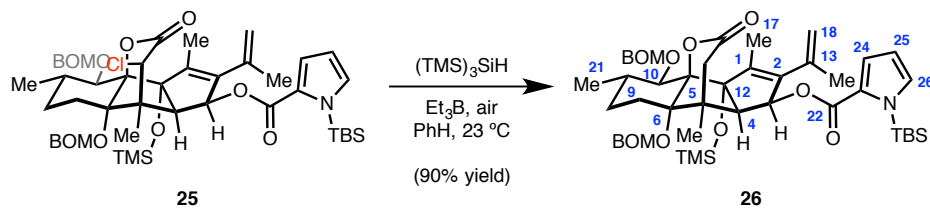

To an oven-dried, 25 mL round-bottomed flask was added chloride **25** (395 mg, 0.43 mmol, 1.0 equiv) and anhydrous PhH (8.6 mL). The solution was treated with  $(\text{TMS})_3\text{SiH}$  (0.27 mL, 0.86 mmol, 2.0 equiv) and  $\text{Et}_3\text{B}$  (1.0 M in hexanes, 0.43 mL, 0.43 mmol, 1.0 equiv) before air (4.0 mL) was slowly sparged through the reaction mixture via syringe. Stirring was continued at ambient temperature for 1 h before additional portions of  $(\text{TMS})_3\text{SiH}$  (0.27 mL, 0.86 mmol, 2.0 equiv),  $\text{Et}_3\text{B}$  (1.0 M in hexanes, 0.43 mL, 0.43 mmol, 1.0 equiv) and air (4.0 mL) were added via syringe. Stirring was then continued until TLC analysis indicated complete consumption of the starting material (*ca.* 1.5 h), during which time the reaction mixture turns dark red-orange. The reaction mixture was next concentrated *in vacuo* and the crude residue was directly purified via  $\text{SiO}_2$  flash chromatography (15 to 20 to 25% EtOAc/hexanes) to afford pyrrole ester **26** as a yellow foam (342 mg, 0.39 mmol, 90% yield).

**TLC (20% EtOAc/hexanes):**  $R_f$  0.36 (UV, *p*-anisaldehyde).

**$^1\text{H}$  NMR (400 MHz,  $\text{CDCl}_3$ ):**  $\delta$  7.39 – 7.27 (m, 10H, *PhCH}\_2\text{OCH}\_2\text{O}), 7.08 (dd,  $J = 9.5, 3.0$  Hz, 1H,  $\text{C}_{26}$ ), 7.06 (dd,  $J = 6.5, 3.1$  Hz, 1H,  $\text{C}_{24}$ ), 6.34 (dq,  $J = 7.9, 2.2$  Hz, 1H,  $\text{C}_3$ ), 6.27 (dd,  $J = 3.6, 2.6$  Hz, 1H,  $\text{C}_{25}$ ), 5.10 (p,  $J = 1.6$  Hz, 1H,  $\text{C}_{18}$ ), 4.98 (s, 2H,  $\text{PhCH}_2\text{OCH}_2\text{O}$ ), 4.98 (d,  $J = 6.7$  Hz, 1H,  $\text{PhCH}_2\text{OCH}_2\text{O}$ ), 4.89 (s, 1H,  $\text{C}_{18}$ ), 4.88 (d,  $J = 6.7$  Hz, 1H,  $\text{PhCH}_2\text{OCH}_2\text{O}$ ), 4.85 (d,  $J = 11.9$  Hz, 1H,  $\text{PhCH}_2\text{OCH}_2\text{O}$ ), 4.77 (d,  $J = 11.6$  Hz, 1H,  $\text{PhCH}_2\text{OCH}_2\text{O}$ ), 4.63 (d,  $J = 11.5$  Hz, 1H,  $\text{PhCH}_2\text{OCH}_2\text{O}$ ), 4.57 (d,  $J = 11.9$  Hz, 1H,  $\text{PhCH}_2\text{OCH}_2\text{O}$ ), 3.97 (d,  $J = 10.3$  Hz, 1H,  $\text{C}_{10}$ ), 3.23 (dd,  $J = 3.6, 1.5$  Hz, 1H,  $\text{C}_4$ ), 3.21 (d,  $J = 19.5$  Hz, 1H,  $\text{C}_{14}$ ), 2.24 (dd,  $J = 19.5, 1.5$  Hz, 1H,  $\text{C}_{14}$ ), 2.10 – 2.01 (m, 1H,  $\text{C}_9$ ), 1.87 (d,  $J = 2.3$  Hz, 3H,  $\text{C}_{17}$ ), 1.85 – 1.80 (m, 1H,  $\text{C}_7$ ), 1.73 (s, 3H,  $\text{C}_{19}$ ), 1.69 – 1.62 (m, 2H,  $\text{C}_8$ ), 1.58 – 1.45 (m, 1H,  $\text{C}_7$ ), 1.15 (d,  $J = 6.4$  Hz, 3H,  $\text{C}_{21}$ ), 0.96 (s, 3H,  $\text{C}_{20}$ ), 0.93 (s, 9H,  $\text{Si}(t\text{-Bu})\text{Me}_2$ ), 0.52 (s, 3H,  $\text{Si}(t\text{-Bu})\text{Me}_2$ ), 0.52 (s, 3H,  $\text{Si}(t\text{-Bu})\text{Me}_2$ ), 0.17 (s, 9H, TMS).*

**$^{13}\text{C}$  NMR (101 MHz,  $\text{CDCl}_3$ ):**  $\delta$  169.0 ( $\text{C}_{15}=\text{O}$ ), 160.4 ( $\text{C}_{22}=\text{O}$ ), 144.2 ( $\text{C}_2$ ), 139.0 ( $\text{C}_1$ ), 138.2 ( $\text{C}_{\text{Ph}}$ ), 138.0 ( $\text{C}_{13}$ ), 137.2 ( $\text{C}_{\text{Ph}}$ ), 133.1 ( $\text{C}_{26}$ ), 128.5 ( $\text{C}_{\text{Ph}}$ ), 128.3 ( $\text{C}_{\text{Ph}}$ ), 127.9 ( $\text{C}_{23}$ ), 127.9 ( $\text{C}_{\text{Ph}}$ ), 127.8 ( $\text{C}_{\text{Ph}}$ ), 127.5 ( $\text{C}_{\text{Ph}}$ ), 121.6 ( $\text{C}_{24}$ ), 116.9 ( $\text{C}_{18}$ ), 110.9 ( $\text{C}_{25}$ ), 98.2 ( $\text{PhCH}_2\text{OCH}_2\text{O}$ ), 97.2 ( $\text{C}_{12}$ ), 93.0 ( $\text{C}_{11}$ ), 89.5 ( $\text{C}_6$ ), 89.3 ( $\text{PhCH}_2\text{OCH}_2\text{O}$ ), 82.3 ( $\text{C}_{10}$ ), 74.4 ( $\text{C}_3$ ), 70.3 ( $\text{PhCH}_2\text{OCH}_2\text{O}$ ), 70.3 ( $\text{PhCH}_2\text{OCH}_2\text{O}$ ), 57.4 ( $\text{C}_4$ ), 46.9 ( $\text{C}_5$ ), 39.0 ( $\text{C}_{14}$ ), 33.4 ( $\text{C}_9$ ), 28.0 ( $\text{C}_8$ ), 27.1 ( $\text{Si}(t\text{-Bu})\text{Me}_2$ ), 20.8 ( $\text{C}_{20}$ ), 20.7 ( $\text{C}_{19}$ ), 20.3 ( $\text{C}_7$ ), 19.2 ( $\text{Si}-\text{C}(\text{CH}_3)_3$ ), 19.1 ( $\text{C}_{21}$ ), 12.8 ( $\text{C}_{17}$ ), 1.8 (TMS), -1.8 ( $\text{Si}(t\text{-Bu})\text{Me}_2$ ), -1.9 ( $\text{Si}(t\text{-Bu})\text{Me}_2$ ).

**FTIR (NaCl, thin film):** 2929, 1948, 1712, 1262, 1150, 1094, 1042, 1026  $\text{cm}^{-1}$ .

**HRMS:** calc'd for  $[\text{M}+\text{NH}_4]^+$  901.4849, found 901.4846.

**$[\alpha]_D^{25}$ :**  $-53^\circ$  ( $c = 0.335$ ,  $\text{CHCl}_3$ ).

## Preparation of alcohol S14:

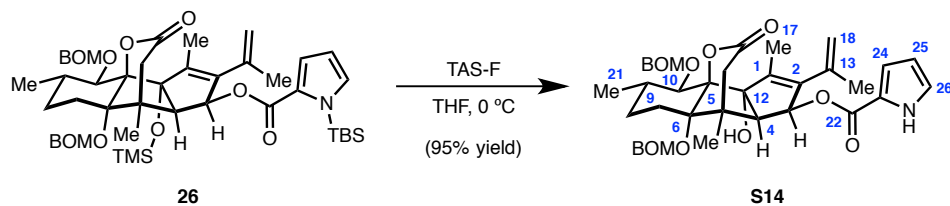

To an oven-dried, 25 mL round-bottomed flask was added silyl ether **26** (271 mg, 0.31 mmol, 1.0 equiv) and anhydrous THF (6.1 mL). The resulting solution was cooled to 0 °C in an ice/water bath and stirring was continued for 15 min prior to the dropwise addition of TAS-F (253 mg, 0.92 mmol, 3.0 equiv) in a minimal amount of anhydrous DMF (1 mL) via syringe, producing a golden yellow solution (Note: TAS-F was stored and handled in a nitrogen-filled glovebox to maintain the integrity of the reagent). After 30 min at 0 °C, an additional portion of TAS-F (169 mg, 0.61 mmol, 2.0 equiv) in a minimal amount of anhydrous DMF (0.5 mL) was added (Note: On smaller scales (<50 mg scale), a small excess of TAS-F was routinely used without issue; however, on scale-up, the reaction consistently stalled at about 50-60% conversion with the TMS group intact and required additional portions of TAS-F). Stirring at 0 °C was continued for another 30 min at which point TLC and LCMS analysis indicated complete consumption of the starting material. The reaction mixture was diluted with Et<sub>2</sub>O (6 mL) and filtered through a short pad of SiO<sub>2</sub>, washing with 65% EtOAc/hexanes until TLC analysis indicated complete elution of the desired product. The filtrate was concentrated *in vacuo* and the crude residue was purified by SiO<sub>2</sub> flash chromatography (30 to 40 to 50% EtOAc/hexanes) to afford alcohol **S14** as a clear oil that solidifies into a white solid upon standing (203 mg, 0.259 mmol, 95% yield).

**TLC (45% EtOAc/hexanes):** R<sub>f</sub> 0.43 (UV, *p*-anisaldehyde).

**<sup>1</sup>H NMR (400 MHz, C<sub>6</sub>D<sub>6</sub>):** δ 8.77 (s, 1H, **NH**), 7.42 – 7.34 (m, 2H, **PhCH<sub>2</sub>OCH<sub>2</sub>O**), 7.30 – 7.19 (m, 4H, **PhCH<sub>2</sub>OCH<sub>2</sub>O**), 7.14 – 7.09 (m, 2H, **PhCH<sub>2</sub>OCH<sub>2</sub>O**), 7.05 – 7.00 (m, 1H, **PhCH<sub>2</sub>OCH<sub>2</sub>O**), 6.98 (td, *J* = 2.5, 1.3 Hz, 1H, C<sub>25</sub>), 6.87 – 6.81 (m, 1H, C<sub>3</sub>), 6.28 (td, *J* = 2.7, 1.4 Hz, 1H, C<sub>26</sub>), 6.05 (dt, *J* = 3.7, 2.5 Hz, 1H, C<sub>24</sub>), 5.29 (dd, *J* = 2.2, 1.1 Hz, 1H, C<sub>18</sub>), 5.09 (t, *J* = 1.9 Hz, 1H, C<sub>18</sub>), 4.93 (d, *J* = 5.4 Hz, 1H, **PhCH<sub>2</sub>OCH<sub>2</sub>O**), 4.70 (d, *J* = 5.5 Hz, 1H, **PhCH<sub>2</sub>OCH<sub>2</sub>O**), 4.63 (d, *J* = 11.8 Hz, 1H, **PhCH<sub>2</sub>OCH<sub>2</sub>O**), 4.54 (d, *J* = 6.7 Hz, 1H, **PhCH<sub>2</sub>OCH<sub>2</sub>O**), 4.52 (d, *J* = 11.8 Hz, 1H, **PhCH<sub>2</sub>OCH<sub>2</sub>O**), 4.45 (d, *J* = 6.7 Hz, 1H, **PhCH<sub>2</sub>OCH<sub>2</sub>O**), 4.35 (d, *J* = 12.4 Hz, 1H, **PhCH<sub>2</sub>OCH<sub>2</sub>O**), 4.35 (s, 1H, **OH**), 4.30 (d, *J* = 12.4 Hz, 1H, **PhCH<sub>2</sub>OCH<sub>2</sub>O**), 4.08 (d, *J* = 10.3 Hz, 1H, C<sub>10</sub>), 3.51 (dd, *J* = 7.9, 1.4 Hz, 1H, C<sub>4</sub>), 3.38 (d, *J* = 19.2 Hz, 1H, C<sub>14</sub>), 2.32 (d, *J* = 2.3 Hz, 3H, C<sub>17</sub>), 2.21 – 2.14 (m, 1H, C<sub>9</sub>), 2.09 (dd, *J* = 19.2, 1.6 Hz, 1H, C<sub>14</sub>), 1.71 (s, 3H, C<sub>18</sub>), 1.42 (qd, *J* = 13.1, 12.7, 4.5, 1H, C<sub>8</sub>), 1.22 – 1.15 (m, 2H, C<sub>8</sub>/C<sub>7</sub>), 1.13 – 1.03 (m, 1H, C<sub>7</sub>), 0.98 (d, *J* = 6.5 Hz, 3H, C<sub>21</sub>), 0.82 (s, 3H, C<sub>20</sub>).

**<sup>13</sup>C NMR (101 MHz, C<sub>6</sub>D<sub>6</sub>):** δ 167.8 (C<sub>15</sub>=O), 160.8 (C<sub>22</sub>=O), 144.2 (C<sub>2</sub>), 139.5 (C<sub>1</sub>), 139.0 (C<sub>13</sub>), 138.3 (C<sub>Ph</sub>), 137.8 (C<sub>Ph</sub>), 128.8 (C<sub>Ph</sub>), 128.7 (C<sub>Ph</sub>), 128.4 (C<sub>Ph</sub>), 128.1 (C<sub>Ph</sub>), 123.8 (C<sub>26</sub>), 122.6 (C<sub>23</sub>), 117.1 (C<sub>18</sub>), 116.0 (C<sub>25</sub>), 110.7 (C<sub>24</sub>), 97.8 (PhCH<sub>2</sub>OCH<sub>2</sub>O), 95.3 (C<sub>12</sub>), 91.4 (C<sub>11</sub>), 90.4 (C<sub>6</sub>), 89.6 (PhCH<sub>2</sub>OCH<sub>2</sub>O), 81.8 (C<sub>10</sub>), 76.0 (C<sub>3</sub>), 70.9 (PhCH<sub>2</sub>OCH<sub>2</sub>O), 70.2 (PhCH<sub>2</sub>OCH<sub>2</sub>O), 59.4 (C<sub>4</sub>), 46.5 (C<sub>5</sub>), 39.8 (C<sub>14</sub>), 33.8 (C<sub>9</sub>), 28.3 (C<sub>8</sub>), 21.0 (C<sub>18</sub>), 20.2 (C<sub>20</sub>), 20.1 (C<sub>7</sub>), 18.9 (C<sub>21</sub>), 13.2 (C<sub>17</sub>).

**FTIR (NaCl, thin film):** 3408, 3307, 2929, 1742, 1699, 1313, 1158, 1034 cm<sup>-1</sup>.

**HRMS:** calc'd for [M+NH<sub>4</sub>]<sup>+</sup> 715.3589, found 715.3589.

**[α]<sub>D</sub><sup>25</sup>:** –37° (*c* = 0.685, CHCl<sub>3</sub>).

## Reduction of alkene S14:

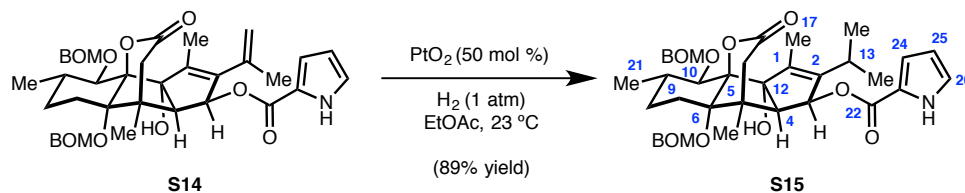

An oven-dried, 50 mL round-bottomed flask was charged with diene **S14** (225 mg, 0.32 mmol, 1.0 equiv), PtO<sub>2</sub> (80% w/w, 36.6 mg, 0.16 mmol, 50 mol %), and EtOAc (13 mL). The vial was capped with a rubber septum and the reaction mixture was vigorously stirred while flushing the headspace with H<sub>2</sub> for 5 minutes via a double-walled balloon, during which time the brown suspension turns black. The suspension was vigorously stirred under H<sub>2</sub> until LCMS indicated complete consumption of the starting material (*ca.* 25 min), flushed with Ar to remove excess H<sub>2</sub>, then diluted with EtOAc (13 mL), filtered through a short pad of Celite, and concentrated *in vacuo*. Purification of the crude residue by SiO<sub>2</sub> flash chromatography (40 to 50% EtOAc/hexanes) afforded **S15** as a clear oil that solidifies into a white solid upon standing (201 mg, 0.29 mmol, 89% yield).

**TLC (45% EtOAc/hexanes):** R<sub>f</sub> 0.42 (UV, *p*-anisaldehyde).

**<sup>1</sup>H NMR (400 MHz, C<sub>6</sub>D<sub>6</sub>):** δ 8.87 (s, 1H, NH), 7.42 – 7.34 (m, 2H, PhCH<sub>2</sub>OCH<sub>2</sub>O), 7.31 – 7.20 (m, 4H, PhCH<sub>2</sub>OCH<sub>2</sub>O), 7.17 – 7.08 (m, 3H, PhCH<sub>2</sub>OCH<sub>2</sub>O), 7.08 – 6.99 (m, 1H, PhCH<sub>2</sub>OCH<sub>2</sub>O), 6.98 (ddd, *J* = 3.9, 2.5, 1.5 Hz, 1H, C<sub>25</sub>), 6.81 (dq, *J* = 7.9, 2.2 Hz, 1H, C<sub>3</sub>), 6.33 (td, *J* = 2.7, 1.4 Hz, 1H, C<sub>26</sub>), 6.09 (dt, *J* = 3.8, 2.5 Hz, 1H, C<sub>24</sub>), 4.97 (d, *J* = 5.6 Hz, 1H, PhCH<sub>2</sub>OCH<sub>2</sub>O), 4.74 (d, *J* = 5.6 Hz, 1H, PhCH<sub>2</sub>OCH<sub>2</sub>O), 4.61 (d, *J* = 11.8 Hz, 1H, PhCH<sub>2</sub>OCH<sub>2</sub>O), 4.53 (d, *J* = 6.7 Hz, 1H, PhCH<sub>2</sub>OCH<sub>2</sub>O), 4.50 (d, *J* = 11.8 Hz, 1H, PhCH<sub>2</sub>OCH<sub>2</sub>O), 4.43 (d, *J* = 6.7 Hz, 1H, PhCH<sub>2</sub>OCH<sub>2</sub>O), 4.41 (d, *J* = 12.4 Hz, 1H, PhCH<sub>2</sub>OCH<sub>2</sub>O), 4.36 (d, *J* = 12.4 Hz, 1H, PhCH<sub>2</sub>OCH<sub>2</sub>O), 4.12 (s, 1H, OH), 4.07 (d, *J* = 10.3 Hz, 1H, C<sub>10</sub>), 3.45 (dd, *J* = 8.0, 1.4 Hz, 1H, C<sub>4</sub>), 3.38 (d, *J* = 19.2 Hz, 1H, C<sub>14</sub>), 2.77 (p, *J* = 7.0 Hz, 1H, C<sub>13</sub>), 2.23 – 2.13 (m, 1H, C<sub>9</sub>), 2.18 (d, *J* = 2.3 Hz, 1H, C<sub>17</sub>), 2.09 (dd, *J* = 19.1, 1.6 Hz, 1H, C<sub>14</sub>), 1.42 (qd, *J* = 13.1, 4.5 Hz, 1H, C<sub>8</sub>), 1.35 (d, *J* = 7.1 Hz, 3H, C<sub>18</sub>), 1.21 – 1.15 (m, 2H, C<sub>8</sub>/C<sub>7</sub>), 1.13 – 1.02 (m, 1H, C<sub>7</sub>), 1.00 (d, *J* = 6.5 Hz, 3H, C<sub>21</sub>), 0.96 (d, *J* = 6.9 Hz, 3H, C<sub>19</sub>), 0.82 (s, 3H, C<sub>20</sub>).

**<sup>13</sup>C NMR (101 MHz, C<sub>6</sub>D<sub>6</sub>):** δ 167.5 (C<sub>15</sub>=O), 160.7 (C<sub>22</sub>=O), 146.0 (C<sub>2</sub>), 138.3 (C<sub>Ph</sub>), 137.9 (C<sub>Ph</sub>), 137.4 (C<sub>1</sub>), 128.8 (C<sub>Ph</sub>), 128.7 (C<sub>Ph</sub>), 128.4 (C<sub>Ph</sub>), 123.7 (C<sub>26</sub>), 122.9 (C<sub>23</sub>), 115.6 (C<sub>25</sub>), 110.8 (C<sub>24</sub>), 97.9 (PhCH<sub>2</sub>OCH<sub>2</sub>O), 95.3 (C<sub>12</sub>), 90.9 (C<sub>6</sub>), 90.5 (C<sub>11</sub>), 89.6 (PhCH<sub>2</sub>OCH<sub>2</sub>O), 82.0 (C<sub>10</sub>), 77.0 (C<sub>3</sub>), 71.0 (PhCH<sub>2</sub>OCH<sub>2</sub>O), 70.3 (PhCH<sub>2</sub>OCH<sub>2</sub>O), 59.3 (C<sub>4</sub>), 46.4 (C<sub>5</sub>), 39.7 (C<sub>14</sub>), 33.8 (C<sub>9</sub>), 28.3 (C<sub>8</sub>), 27.6 (C<sub>13</sub>), 22.0 (C<sub>18</sub>), 20.2 (C<sub>20</sub>), 20.1 (C<sub>7</sub>), 19.0 (C<sub>19</sub>), 18.9 (C<sub>21</sub>), 11.8 (C<sub>17</sub>).

**FTIR (NaCl, thin film):** 3417, 3306, 2962, 1934, 1743, 1699, 1158, 1026 cm<sup>-1</sup>.

**HRMS:** calc'd for [M+Na]<sup>+</sup> 722.3300, found 722.3299.

**[α]<sub>D</sub><sup>25</sup>:** +7° (*c* = 0.675, CHCl<sub>3</sub>).

## Preparation of epoxide 27:

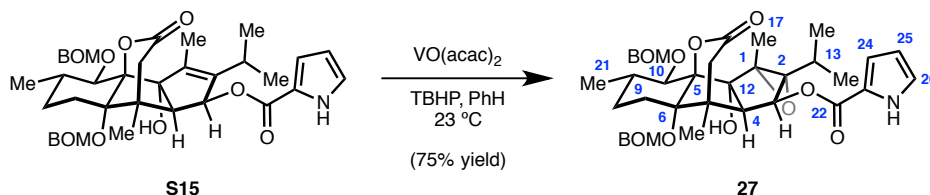

To an oven-dried, 25 mL round-bottomed flask was added alcohol **S15** (175 mg, 0.25 mmol, 1.0 equiv) and anhydrous PhH (5.0 mL). The solution was treated with VO(acac)<sub>2</sub> (33.2 mg, 0.13 mmol, 0.5 equiv) and then TBHP (5.5 M in decanes, 0.14 mL, 0.75 mmol, 3.0 equiv) was added via syringe along the side of the flask,

during which time the green solution turns a deep red. After 30 min, additional portions of VO(acac)<sub>2</sub> (16.6 mg, 62.5 μmol, 0.25 equiv) and then TBHP (5.5 M in decanes, 0.14 mL, 0.75 mmol, 3.0 equiv) were added and stirring was continued at ambient temperature until LCMS indicated complete consumption of the starting material (*ca.* 30-45 min), at which point the reaction mixture fades to a bright orange. The reaction mixture was diluted with EtOAc (5 mL) and quenched with the addition of sat. aq. Na<sub>2</sub>S<sub>2</sub>O<sub>3</sub> (10 mL). The layers were separated and the aqueous layer was extracted with EtOAc (3 x 10 mL). The combined organic layers were washed with brine (10 mL), dried over Na<sub>2</sub>SO<sub>4</sub>, filtered, and concentrated *in vacuo*. Purification of the crude residue by SiO<sub>2</sub> flash chromatography (35 to 45% EtOAc/hexanes) afforded epoxide **27** as an off-white foam (135 mg, 0.19 mmol, 75% yield).

**TLC (45% EtOAc/hexanes):** R<sub>f</sub> 0.48 (UV, *p*-anisaldehyde).

**<sup>1</sup>H NMR (400 MHz, C<sub>6</sub>D<sub>6</sub>):** δ 8.89 (s, 1H, **NH**), 7.38 – 7.35 (m, 4H, **PhCH<sub>2</sub>OCH<sub>2</sub>O**), 7.27 – 7.23 (m, 2H, **PhCH<sub>2</sub>OCH<sub>2</sub>O**), 7.21 – 7.16 (m, 2H, **PhCH<sub>2</sub>OCH<sub>2</sub>O**), 7.15 – 7.05 (m, 2H, **PhCH<sub>2</sub>OCH<sub>2</sub>O**), 6.96 (ddd, *J* = 3.9, 2.5, 1.4 Hz, 1H, C<sub>25</sub>), 6.34 (td, *J* = 2.7, 1.4 Hz, 1H, C<sub>26</sub>), 6.29 (d, *J* = 8.9 Hz, 1H, C<sub>3</sub>), 6.09 (dt, *J* = 3.8, 2.5 Hz, C<sub>24</sub>), 5.20 (d, *J* = 6.4 Hz, 1H, PhCH<sub>2</sub>O**CH<sub>2</sub>O**), 4.98 (d, *J* = 6.4 Hz, 1H, PhCH<sub>2</sub>O**CH<sub>2</sub>O**), 4.77 (d, *J* = 12.2 Hz, 1H, Ph**CH<sub>2</sub>OCH<sub>2</sub>O**), 4.61 (d, *J* = 11.7 Hz, 1H, Ph**CH<sub>2</sub>OCH<sub>2</sub>O**), 4.54 (d, *J* = 12.1 Hz, 1H, Ph**CH<sub>2</sub>OCH<sub>2</sub>O**), 4.51 (d, *J* = 11.7 Hz, 1H, Ph**CH<sub>2</sub>OCH<sub>2</sub>O**), 4.47 (d, *J* = 6.8 Hz, 1H, PhCH<sub>2</sub>O**CH<sub>2</sub>O**), 4.38 (d, *J* = 6.8 Hz, 1H, PhCH<sub>2</sub>O**CH<sub>2</sub>O**), 4.16 (d, *J* = 10.5 Hz, 1H, C<sub>10</sub>), 3.70 (d, *J* = 19.8 Hz, 1H, C<sub>14</sub>), 3.20 (s, 1H, **OH**), 3.12 (dd, *J* = 8.9, 1.6 Hz, 1H, C<sub>4</sub>), 2.24 – 2.13 (m, 1H, C<sub>9</sub>), 2.16 (dd, *J* = 19.8, 1.7 Hz, 1H, C<sub>14</sub>), 1.97 (s, 3H, C<sub>17</sub>), 1.74 (p, *J* = 7.2 Hz, 1H, C<sub>13</sub>), 1.40 (d, *J* = 7.2 Hz, 3H, C<sub>18</sub>), 1.39 – 1.30 (m, 1H, C<sub>8</sub>), 1.24 – 1.21 (m, 1H, C<sub>8</sub>), 1.18 (d, *J* = 6.5 Hz, 3H, C<sub>21</sub>), 1.15 – 1.09 (m, 2H, C<sub>7</sub>), 1.07 (d, *J* = 7.2 Hz, 3H, C<sub>19</sub>), 0.74 (s, 3H, C<sub>20</sub>).

**<sup>13</sup>C NMR (101 MHz, C<sub>6</sub>D<sub>6</sub>):** δ 167.8 (C<sub>15</sub>=O), 160.1 (C<sub>22</sub>=O), 138.8 (C<sub>Ph</sub>), 138.1 (C<sub>Ph</sub>), 128.7 (C<sub>Ph</sub>), 128.6 (C<sub>Ph</sub>), 128.5 (C<sub>Ph</sub>), 127.6 (C<sub>Ph</sub>), 124.6 (C<sub>26</sub>), 122.1 (C<sub>23</sub>), 116.0 (C<sub>25</sub>), 111.0 (C<sub>24</sub>), 98.0 (PhCH<sub>2</sub>OCH<sub>2</sub>O), 91.8 (C<sub>12</sub>), 91.7 (C<sub>11</sub>), 90.3 (C<sub>6</sub>), 88.9 (PhCH<sub>2</sub>OCH<sub>2</sub>O), 81.8 (C<sub>10</sub>), 80.2 (C<sub>2</sub>), 76.2 (C<sub>1</sub>), 73.4 (C<sub>3</sub>), 70.6 (PhCH<sub>2</sub>OCH<sub>2</sub>O), 70.5 (PhCH<sub>2</sub>OCH<sub>2</sub>O), 64.2 (C<sub>4</sub>), 47.7 (C<sub>5</sub>), 38.9 (C<sub>14</sub>), 33.1 (C<sub>9</sub>), 30.7 (C<sub>13</sub>), 28.4 (C<sub>8</sub>), 20.5 (C<sub>20</sub>), 19.9 (C<sub>7</sub>), 19.2 (C<sub>21</sub>), 18.0 (C<sub>18</sub>), 17.4 (C<sub>19</sub>), 14.6 (C<sub>17</sub>).

**FTIR (NaCl, thin film):** 3305, 2964, 1747, 1705, 1026 cm<sup>-1</sup>.

**HRMS:** calc'd for [M+Na]<sup>+</sup> 738.3249, found 738.3250.

[α]<sub>D</sub><sup>25</sup>: +37° (*c* = 0.900, CHCl<sub>3</sub>).

### Preparation of 20-deoxyspiganthine (**3**):

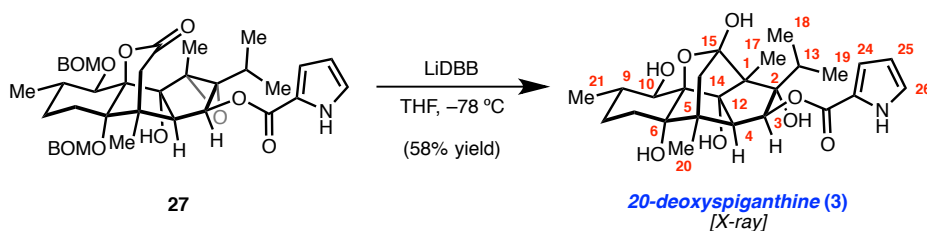

An oven-dried, 100 mL round-bottomed flask equipped with a borosilicate glass-coated magnetic stirbar was charged with epoxide **27** (135 mg, 0.19 mmol, 1.0 equiv) and anhydrous THF (18 mL) under Ar (Note: epoxide **27** was azeotroped with PhH three times immediately prior to use). The solution was cooled to –78 °C via a dry ice/acetone bath and stirring continued for 15 min before a freshly prepared solution of LiDBB (0.16 M, 11.8 mL, 1.89 mmol, 10 equiv) was carefully added dropwise via syringe along the side of the flask. The resulting deep green mixture was stirred for 0.5 h at –78 °C, at which point LCMS analysis indicated complete conversion to the desired product. Sat. aq. NH<sub>4</sub>Cl (10 mL) was carefully added before the reaction mixture was warmed to ambient temperature. The organic layer was separated and the aqueous layer was extracted with CHCl<sub>3</sub> (3 x 20

mL). The combined organic layers were dried over Na<sub>2</sub>SO<sub>4</sub>, filtered, and concentrated *in vacuo*. The crude residue was purified by SiO<sub>2</sub> flash chromatography (0 to 5 to 10% MeOH/CHCl<sub>3</sub>) to afford 20-deoxyspiganthine (**3**) (51.8 mg, 0.11 mmol, 58% yield) as a white powder (Note: The purification was made easier by first flushing with CHCl<sub>3</sub> (100 mL) until all of the excess 4,4'-di-*tert*-butylbiphenyl was removed).

**TLC (10% MeOH/CH<sub>2</sub>Cl<sub>2</sub>):** R<sub>f</sub> 0.29 (UV, *p*-anisaldehyde).

**<sup>1</sup>H NMR (400 MHz, CD<sub>3</sub>OD):** δ 7.01 (dd, *J* = 2.5, 1.5 Hz, 1H, C<sub>26</sub>), 6.86 (dd, *J* = 3.8, 1.5 Hz, 1H, C<sub>24</sub>), 6.22 (dd, *J* = 3.8, 2.5 Hz, 1H, C<sub>25</sub>), 5.65 (d, *J* = 8.5, Hz, 1H, C<sub>3</sub>), 3.75 (d, *J* = 10.3 Hz, 1H, C<sub>10</sub>), 3.23 (dd, *J* = 8.5, 1.8 Hz, 1H, C<sub>4</sub>), 2.41 (h, *J* = 6.6 Hz, C<sub>13</sub>), 2.35 (d, *J* = 13.5, 1H, C<sub>14</sub>), 2.04 (td, *J* = 12.5, 5.9 Hz, 1H, C<sub>7</sub>), 1.77 – 1.87 (m, 1H, C<sub>9</sub>), 1.77 (dd, *J* = 13.5, 2.0 Hz, 1H, C<sub>14</sub>), 1.45 – 1.58 (m, 2H, C<sub>8</sub>), 1.37 (s, 3H, C<sub>17</sub>), 1.22 (ddd, *J* = 13.0, 4.3, 2.4, 1H, C<sub>7</sub>), 1.17 (d, *J* = 6.5 Hz, 3H, C<sub>18</sub>), 1.02 (d, *J* = 6.5 Hz, 3H, C<sub>21</sub>), 0.84 (d, *J* = 6.4 Hz, 3H, C<sub>19</sub>), 0.77 (s, 3H, C<sub>20</sub>).

**<sup>13</sup>C NMR (101 MHz, CD<sub>3</sub>OD):** δ 161.9 (C<sub>22</sub>), 125.3 (C<sub>26</sub>), 123.6 (C<sub>23</sub>), 116.8 (C<sub>24</sub>), 110.9 (C<sub>25</sub>), 103.6 (C<sub>15</sub>), 97.7 (C<sub>12</sub>), 86.8 (C<sub>11</sub>), 86.8 (C<sub>2</sub>), 85.2 (C<sub>3</sub>), 84.3 (C<sub>6</sub>), 72.8 (C<sub>10</sub>), 64.7 (C<sub>1</sub>), 57.7 (C<sub>4</sub>), 48.2 (C<sub>5</sub>), 41.4 (C<sub>14</sub>), 35.4 (C<sub>9</sub>), 31.1 (C<sub>13</sub>), 29.9 (C<sub>8</sub>), 26.4 (C<sub>7</sub>), 19.5 (C<sub>18</sub>), 19.1 (C<sub>19</sub>), 19.0 (C<sub>21</sub>), 16.7 (C<sub>20</sub>), 9.7 (C<sub>17</sub>).

**FTIR (NaCl, thin film):** 3436, 2929, 1682, 1411, 1319 cm<sup>-1</sup>.

**HRMS:** calc'd for [M-H]<sup>-</sup> 476.2290, found 476.2290.

**[α]<sub>D</sub><sup>25</sup>:** +6° (*c* = 0.160, MeOH).

## 5. <sup>1</sup>H and <sup>13</sup>C NMR Comparison Tables for (+)-Ryanodine and (+)-20-Deoxyspiganthine

**Table S3. Comparison of <sup>1</sup>H NMR data for (+)-Ryanodine**

| Proton No. | Inoue et al. Report,<br>Synthetic (+)-Ryanodine <sup>8</sup><br><sup>1</sup> H NMR, 400 MHz, CD <sub>3</sub> OD<br><sup>1</sup> H [δ, multi., <i>J</i> (Hz)] | This Work,<br>Synthetic (+)-Ryanodine<br><sup>1</sup> H NMR, 600 MHz, CD <sub>3</sub> OD<br><sup>1</sup> H [δ, multi., <i>J</i> (Hz)] |
|------------|--------------------------------------------------------------------------------------------------------------------------------------------------------------|---------------------------------------------------------------------------------------------------------------------------------------|
| 1          |                                                                                                                                                              |                                                                                                                                       |
| 2          |                                                                                                                                                              |                                                                                                                                       |
| 3          | 5.64 (s)                                                                                                                                                     | 5.64 (s)                                                                                                                              |
| 4          |                                                                                                                                                              |                                                                                                                                       |
| 5          |                                                                                                                                                              |                                                                                                                                       |
| 6          |                                                                                                                                                              |                                                                                                                                       |
| 7a         | 1.26 (ddd, <i>J</i> = 12.7, 4.5, 2.3)                                                                                                                        | 1.26 (ddd, <i>J</i> = 12.7, 4.6, 2.0)                                                                                                 |
| 7b         | 2.10 (ddd, <i>J</i> = 12.7, 12.7, 5.4)                                                                                                                       | 2.10 (td, <i>J</i> = 12.9, 5.2)                                                                                                       |
| 8a         | 1.46 (dddd, <i>J</i> = 13.1, 5.4, 5.4, 2.3)                                                                                                                  | 1.48 (td, <i>J</i> = 13.0, 4.7)                                                                                                       |
| 8b         | 1.53 (dddd, <i>J</i> = 13.1, 5.2, 1.6)                                                                                                                       | 1.54 (dtd, <i>J</i> = 12.4, 5.2, 1.8)                                                                                                 |
| 9          | 1.85 (ddqd, <i>J</i> = 13.1, 10.4, 6.8, 5.4)                                                                                                                 | 1.85 (tdd, <i>J</i> = 10.2, 8.5, 5.6)                                                                                                 |
| 10         | 3.80 (d, <i>J</i> = 10.4)                                                                                                                                    | 3.80 (d, <i>J</i> = 10.2)                                                                                                             |
| 11         |                                                                                                                                                              |                                                                                                                                       |
| 12         |                                                                                                                                                              |                                                                                                                                       |
| 13         | 2.27 (qq, <i>J</i> = 6.8, 6.3)                                                                                                                               | 2.27 (h, <i>J</i> = 6.8)                                                                                                              |
| 14a        | 1.93 (d, <i>J</i> = 13.6)                                                                                                                                    | 1.94 (d, <i>J</i> = 13.6)                                                                                                             |
| 14b        | 2.57 (d, <i>J</i> = 13.6)                                                                                                                                    | 2.57 (d, <i>J</i> = 13.6)                                                                                                             |
| 15         |                                                                                                                                                              |                                                                                                                                       |
| 17         | 1.39 (s)                                                                                                                                                     | 1.40 (s)                                                                                                                              |
| 18         | 0.76 (d, <i>J</i> = 6.3)                                                                                                                                     | 0.76 (d, <i>J</i> = 6.5)                                                                                                              |
| 19         | 1.12 (d, <i>J</i> = 6.8)                                                                                                                                     | 1.12 (d, <i>J</i> = 6.7)                                                                                                              |
| 20         | 0.90 (s)                                                                                                                                                     | 0.90 (s)                                                                                                                              |
| 21         | 1.02 (d, <i>J</i> = 6.8)                                                                                                                                     | 1.02 (d, <i>J</i> = 6.5)                                                                                                              |
| 22         |                                                                                                                                                              |                                                                                                                                       |
| 23         |                                                                                                                                                              |                                                                                                                                       |
| 24         | 6.88 (dd, <i>J</i> = 3.6, 1.4)                                                                                                                               | 6.88 (dd, <i>J</i> = 3.7, 1.5)                                                                                                        |
| 25         | 6.24 (dd, <i>J</i> = 3.6, 2.7)                                                                                                                               | 6.24 (dd, <i>J</i> = 3.8, 2.5)                                                                                                        |
| 26         | 7.04 (dd, <i>J</i> = 2.7, 1.4)                                                                                                                               | 7.04 (dd, <i>J</i> = 2.5, 1.5)                                                                                                        |

**Table S4. Comparison of  $^{13}\text{C}$  NMR data for (+)-Ryanodine**

| Carbon No. | Inoue et al. Report,<br>Synthetic (+)-Ryanodine <sup>8</sup><br>$^{13}\text{C}$ NMR, 100 MHz, $\text{CD}_3\text{OD}$<br>$^{13}\text{C}$ ( $\delta$ ) ppm | This Work,<br>Synthetic (+)-Ryanodine<br>$^{13}\text{C}$ NMR, 101 MHz, $\text{CD}_3\text{OD}$<br>$^{13}\text{C}$ ( $\delta$ ) ppm | Chemical Shift<br>Difference, $\Delta\delta$ |
|------------|----------------------------------------------------------------------------------------------------------------------------------------------------------|-----------------------------------------------------------------------------------------------------------------------------------|----------------------------------------------|
| 1          | 65.9                                                                                                                                                     | 65.9                                                                                                                              | 0                                            |
| 2          | 84.4                                                                                                                                                     | 84.3                                                                                                                              | 0.1                                          |
| 3          | 90.9                                                                                                                                                     | 90.8                                                                                                                              | 0.1                                          |
| 4          | 92.4                                                                                                                                                     | 92.3                                                                                                                              | 0.1                                          |
| 5          | 49.7                                                                                                                                                     | 49.6                                                                                                                              | 0.1                                          |
| 6          | 86.6                                                                                                                                                     | 86.5                                                                                                                              | 0.1                                          |
| 7          | 26.8                                                                                                                                                     | 26.8                                                                                                                              | 0                                            |
| 8          | 29.3                                                                                                                                                     | 29.3                                                                                                                              | 0                                            |
| 9          | 35.4                                                                                                                                                     | 35.4                                                                                                                              | 0                                            |
| 10         | 72.8                                                                                                                                                     | 72.8                                                                                                                              | 0                                            |
| 11         | 87.4                                                                                                                                                     | 87.4                                                                                                                              | 0                                            |
| 12         | 96.7                                                                                                                                                     | 96.7                                                                                                                              | 0                                            |
| 13         | 30.9                                                                                                                                                     | 30.9                                                                                                                              | 0                                            |
| 14         | 41.8                                                                                                                                                     | 41.8                                                                                                                              | 0                                            |
| 15         | 102.9                                                                                                                                                    | 102.9                                                                                                                             | 0                                            |
| 17         | 10.2                                                                                                                                                     | 10.2                                                                                                                              | 0                                            |
| 18         | 18.9                                                                                                                                                     | 18.9                                                                                                                              | 0                                            |
| 19         | 19.5                                                                                                                                                     | 19.5                                                                                                                              | 0                                            |
| 20         | 12.5                                                                                                                                                     | 12.6                                                                                                                              | 0.1                                          |
| 21         | 19.0                                                                                                                                                     | 19.0                                                                                                                              | 0                                            |
| 22         | 161.8                                                                                                                                                    | 161.8                                                                                                                             | 0                                            |
| 23         | 123.4                                                                                                                                                    | 123.3                                                                                                                             | 0.1                                          |
| 24         | 117.0                                                                                                                                                    | 117.0                                                                                                                             | 0                                            |
| 25         | 110.9                                                                                                                                                    | 110.9                                                                                                                             | 0                                            |
| 26         | 125.6                                                                                                                                                    | 125.6                                                                                                                             | 0                                            |

Note: The carbon assignment of  $\text{C}_5$  by Inoue and coworkers was deduced from HMBC correlation.



**Table S5. Comparison of <sup>1</sup>H NMR data for (+)-20-Deoxyspiganthine**

| Proton No. | Hübner et al. Report,<br>Natural (+)-20-Deoxyspiganthine <sup>11</sup><br><sup>1</sup> H NMR, 360 MHz, CD <sub>3</sub> OD<br><sup>1</sup> H [δ, multi., <i>J</i> (Hz)] | This Work,<br>Synthetic (+)-20-Deoxyspiganthine<br><sup>1</sup> H NMR, 400 MHz, CD <sub>3</sub> OD<br><sup>1</sup> H [δ, multi., <i>J</i> (Hz)] |
|------------|------------------------------------------------------------------------------------------------------------------------------------------------------------------------|-------------------------------------------------------------------------------------------------------------------------------------------------|
| 1          |                                                                                                                                                                        |                                                                                                                                                 |
| 2          |                                                                                                                                                                        |                                                                                                                                                 |
| 3          | 5.65 (d, <i>J</i> = 8.5)                                                                                                                                               | 5.65 (d, <i>J</i> = 8.5)                                                                                                                        |
| 4          | 3.23 (dd, <i>J</i> = 8.5, 2)                                                                                                                                           | 3.23 (dd, <i>J</i> = 8.5, 1.8)                                                                                                                  |
| 5          |                                                                                                                                                                        |                                                                                                                                                 |
| 6          |                                                                                                                                                                        |                                                                                                                                                 |
| 7a         | 2.04 (ddd, <i>J</i> = 13.5, 12, 6)                                                                                                                                     | 2.04 (td, <i>J</i> = 12.5, 5.9)                                                                                                                 |
| 7b         | 1.22 (ddd, <i>J</i> = 13.5, 4.5, 4)                                                                                                                                    | 1.22 (ddd, <i>J</i> = 13.0, 4.3, 2.4)                                                                                                           |
| 8a         | 1.45–1.58 (m)                                                                                                                                                          | 1.45–1.58 (m)                                                                                                                                   |
| 8b         | 1.45–1.58 (m)                                                                                                                                                          | 1.45–1.58 (m)                                                                                                                                   |
| 9          | 1.77–1.87 (m)                                                                                                                                                          | 1.77–1.87 (m)                                                                                                                                   |
| 10         | 3.75 (d, <i>J</i> = 10)                                                                                                                                                | 3.75 (d, <i>J</i> = 10.3)                                                                                                                       |
| 11         |                                                                                                                                                                        |                                                                                                                                                 |
| 12         |                                                                                                                                                                        |                                                                                                                                                 |
| 13         | 2.41 (qq, <i>J</i> = 6.5, 6.5)                                                                                                                                         | 2.41 (h, <i>J</i> = 6.6)                                                                                                                        |
| 14a        | 2.35 (d, <i>J</i> = 13.5)                                                                                                                                              | 2.35 (d, <i>J</i> = 13.5)                                                                                                                       |
| 14b        | 1.77 (dd, 13.5, 2)                                                                                                                                                     | 1.77 (dd, <i>J</i> = 13.5, 2.0)                                                                                                                 |
| 15         |                                                                                                                                                                        |                                                                                                                                                 |
| 17         | 1.36 (s)                                                                                                                                                               | 1.37 (s)                                                                                                                                        |
| 18         | 1.16 (d, <i>J</i> = 6.5)                                                                                                                                               | 1.17 (d, <i>J</i> = 6.4)                                                                                                                        |
| 19         | 0.84 (d, <i>J</i> = 6.5)                                                                                                                                               | 0.84 (d, <i>J</i> = 6.5)                                                                                                                        |
| 20         | 0.77 (s)                                                                                                                                                               | 0.77 (s)                                                                                                                                        |
| 21         | 1.01 (d, <i>J</i> = 6.5)                                                                                                                                               | 1.02 (d, <i>J</i> = 6.5)                                                                                                                        |
| 22         |                                                                                                                                                                        |                                                                                                                                                 |
| 23         |                                                                                                                                                                        |                                                                                                                                                 |
| 24         | 6.85 (dd, <i>J</i> = 4, 1.5)                                                                                                                                           | 6.86 (dd, <i>J</i> = 3.8, 1.5)                                                                                                                  |
| 25         | 4.22 (dd, <i>J</i> = 4, 2.5)                                                                                                                                           | 6.22 (dd, <i>J</i> = 3.8, 2.5)                                                                                                                  |
| 26         | 7.01 (dd, <i>J</i> = 2.5, 1.5)                                                                                                                                         | 7.01 (dd, <i>J</i> = 2.5, 1.5)                                                                                                                  |

Note: In the isolation report, Hübner and coworkers report that C<sub>25</sub>H has a <sup>1</sup>H NMR chemical shift of 4.22 ppm; however, all related ryanodines and spiganthines reported in the same paper share a C<sub>25</sub>H <sup>1</sup>H NMR chemical shift between 6.22 and 6.25 ppm, as observed in our synthetic sample. This is assumed to be a typographical error made by the isolation team.

**Table S6. Comparison of  $^{13}\text{C}$  NMR data for (+)-20-Deoxyspiganthine**

| Carbon No. | Hübner et al. Report,<br>Natural (+)-20-Deoxyspiganthine <sup>11</sup><br>$^{13}\text{C}$ NMR, 90 MHz, $\text{CD}_3\text{OD}$<br>$^{13}\text{C}$ ( $\delta$ ) ppm | This Work,<br>Synthetic (+)-20-Deoxyspiganthine<br>$^{13}\text{C}$ NMR, 101 MHz, $\text{CD}_3\text{OD}$<br>$^{13}\text{C}$ ( $\delta$ ) ppm | Chemical Shift<br>Difference, $\Delta\delta$ |
|------------|-------------------------------------------------------------------------------------------------------------------------------------------------------------------|---------------------------------------------------------------------------------------------------------------------------------------------|----------------------------------------------|
| 1          | 64.7                                                                                                                                                              | 64.7                                                                                                                                        | 0                                            |
| 2          | 86.6                                                                                                                                                              | 86.8                                                                                                                                        | 0.2                                          |
| 3          | 85.2                                                                                                                                                              | 85.2                                                                                                                                        | 0                                            |
| 4          | 57.7                                                                                                                                                              | 57.7                                                                                                                                        | 0                                            |
| 5          | 48.3                                                                                                                                                              | 48.2                                                                                                                                        | 0.1                                          |
| 6          | 84.3                                                                                                                                                              | 84.3                                                                                                                                        | 0                                            |
| 7          | 26.4                                                                                                                                                              | 26.4                                                                                                                                        | 0                                            |
| 8          | 29.9                                                                                                                                                              | 29.9                                                                                                                                        | 0                                            |
| 9          | 35.4                                                                                                                                                              | 35.4                                                                                                                                        | 0                                            |
| 10         | 72.9                                                                                                                                                              | 72.8                                                                                                                                        | 0.1                                          |
| 11         | 86.8                                                                                                                                                              | 86.8                                                                                                                                        | 0                                            |
| 12         | 97.8                                                                                                                                                              | 97.7                                                                                                                                        | 0.1                                          |
| 13         | 31.1                                                                                                                                                              | 31.1                                                                                                                                        | 0                                            |
| 14         | 41.5                                                                                                                                                              | 41.4                                                                                                                                        | 0.1                                          |
| 15         | 103.6                                                                                                                                                             | 103.6                                                                                                                                       | 0                                            |
| 17         | 9.6                                                                                                                                                               | 9.7                                                                                                                                         | 0.1                                          |
| 18         | 19.5                                                                                                                                                              | 19.5                                                                                                                                        | 0                                            |
| 19         | 19.1                                                                                                                                                              | 19.1                                                                                                                                        | 0                                            |
| 20         | 16.7                                                                                                                                                              | 16.7                                                                                                                                        | 0                                            |
| 21         | 18.9                                                                                                                                                              | 19.0                                                                                                                                        | 0.1                                          |
| 22         | 162.0                                                                                                                                                             | 161.9                                                                                                                                       | 0.1                                          |
| 23         | 123.6                                                                                                                                                             | 123.6                                                                                                                                       | 0                                            |
| 24         | 116.8                                                                                                                                                             | 116.8                                                                                                                                       | 0                                            |
| 25         | 110.9                                                                                                                                                             | 110.9                                                                                                                                       | 0                                            |
| 26         | 125.3                                                                                                                                                             | 125.3                                                                                                                                       | 0                                            |

## 6. Single Crystal X-ray Diffraction Data

Low-temperature diffraction data ( $\varphi$ - and  $\omega$ -scans) were collected on a Bruker AXS D8 VENTURE KAPPA diffractometer coupled to a PHOTON 100 CMOS detector with Cu-K $\alpha$  radiation ( $\lambda = 1.54178 \text{ \AA}$ ) from a I $\mu$ S HB micro-focus sealed X-ray tube. All diffractometer manipulations, including data collection, integration, and scaling were carried out using the Bruker APEXII software.<sup>12</sup> Absorption corrections were applied using SADABS.<sup>13</sup> The structure was solved by intrinsic phasing using SHELXT<sup>14</sup> and refined against  $F^2$  on all data by full-matrix least squares with SHELXL-2014<sup>14</sup> using established refinement techniques.<sup>15</sup> All non-hydrogen atoms were refined anisotropically. All hydrogen atoms were included into the model at geometrically calculated positions and refined using a riding model. The isotropic displacement parameters of all hydrogen atoms were fixed to 1.2 times the  $U$  value of the atoms they are linked to (1.5 times for methyl groups and hydroxyl groups). Absolute configuration was determined by anomalous dispersion.<sup>16</sup> Crystallographic data for **16**, **18**, **1**, and **3** can be obtained free of charge from The Cambridge Crystallographic Data Centre (CCDC) via [www.ccdc.cam.ac.uk/data\\_request/cif](http://www.ccdc.cam.ac.uk/data_request/cif) under CCDC deposition numbers 1508482–1508485. Graphical representation of the structures with 50% probability thermal ellipsoids was generated using Mercury visualization software.

**Table S7. Crystal and refinement data for compounds 16, 18, 1, and 3.**

|                                                                 | <b>CX-10-028</b>                                  | <b>CX-10-036</b>                                | <b>CX-10-076</b>                                 | <b>6-AH-235</b>                                                      |
|-----------------------------------------------------------------|---------------------------------------------------|-------------------------------------------------|--------------------------------------------------|----------------------------------------------------------------------|
| CCDC Number                                                     | 1508483                                           | 1508482                                         | 1508484                                          | 1508485                                                              |
| Empirical formula                                               | C <sub>42</sub> H <sub>48</sub> BNO <sub>10</sub> | C <sub>25</sub> H <sub>33</sub> NO <sub>8</sub> | C <sub>33</sub> H <sub>57</sub> NO <sub>12</sub> | C <sub>58</sub> H <sub>90.76</sub> N <sub>2</sub> O <sub>18.38</sub> |
| Formula weight                                                  | 737.62                                            | 475.52                                          | 659.79                                           | 1110.22                                                              |
| T (K)                                                           | 100                                               | 100                                             | 200                                              | 100                                                                  |
| Crystal system                                                  | Monoclinic                                        | Orthorhombic                                    | Orthorhombic                                     | Trigonal                                                             |
| Space group                                                     | P2 <sub>1</sub>                                   | P2 <sub>1</sub> 2 <sub>1</sub> 2                | P2 <sub>1</sub> 2 <sub>1</sub> 2 <sub>1</sub>    | P3 <sub>2</sub>                                                      |
| a, Å                                                            | 8.7826(4)                                         | 18.9642(8)                                      | 10.9374(3)                                       | 20.8804(7)                                                           |
| b, Å                                                            | 22.1496(10)                                       | 11.2161(4)                                      | 11.9604(3)                                       | 20.8804(7)                                                           |
| c, Å                                                            | 10.3099(5)                                        | 13.5628(5)                                      | 27.4814(7)                                       | 11.5639(5)                                                           |
| $\alpha$ , °                                                    | 90                                                | 90                                              | 90                                               | 90                                                                   |
| $\beta$ , °                                                     | 109.928(2)                                        | 90                                              | 90                                               | 90                                                                   |
| $\gamma$ , °                                                    | 90                                                | 90                                              | 90                                               | 120                                                                  |
| Volume, Å <sup>3</sup>                                          | 1885.50(15)                                       | 2884.87(19)                                     | 3595.00(16)                                      | 4366.3(3)                                                            |
| Z                                                               | 2                                                 | 4                                               | 4                                                | 3                                                                    |
| $d_{\text{calc}}$ , g/cm <sup>3</sup>                           | 1.299                                             | 1.095                                           | 1.219                                            | 1.267                                                                |
| Abs. coeff. (mm <sup>-1</sup> )                                 | 0.749                                             | 0.676                                           | 0.759                                            | 0.770                                                                |
| $\theta$ range, °                                               | 3.991 to 79.080                                   | 3.258 to 66.577                                 | 3.216 to 79.361                                  | 4.234 to 79.349                                                      |
| Abs. correction                                                 | Semi-empirical                                    | Semi-empirical                                  | Semi-empirical                                   | Semi-empirical                                                       |
| GOF                                                             | 1.047                                             | 1.055                                           | 1.045                                            | 1.023                                                                |
| $R_1$ , <sup>a</sup> $wR_2$ , <sup>b</sup> [ $I > 2\sigma(I)$ ] | 0.0311, 0.0732                                    | 0.0563, 0.1375                                  | 0.0389, 0.1064                                   | 0.0448, 0.1071                                                       |
| Flack parameter                                                 | 0.12(5)                                           | 0.23(12)                                        | 0.05(3)                                          | 0.07(6)                                                              |
| Extinction coefficient                                          | 0.00071(18)                                       | n/a                                             | n/a                                              | n/a                                                                  |

$${}^a R_1 = \Sigma ||F_o| - |F_c|| / \Sigma |F_o|, \quad {}^b wR_2 = [\Sigma [w(F_o^2 - F_c^2)^2] / \Sigma [w(F_o^2)^2]]^{1/2}.$$

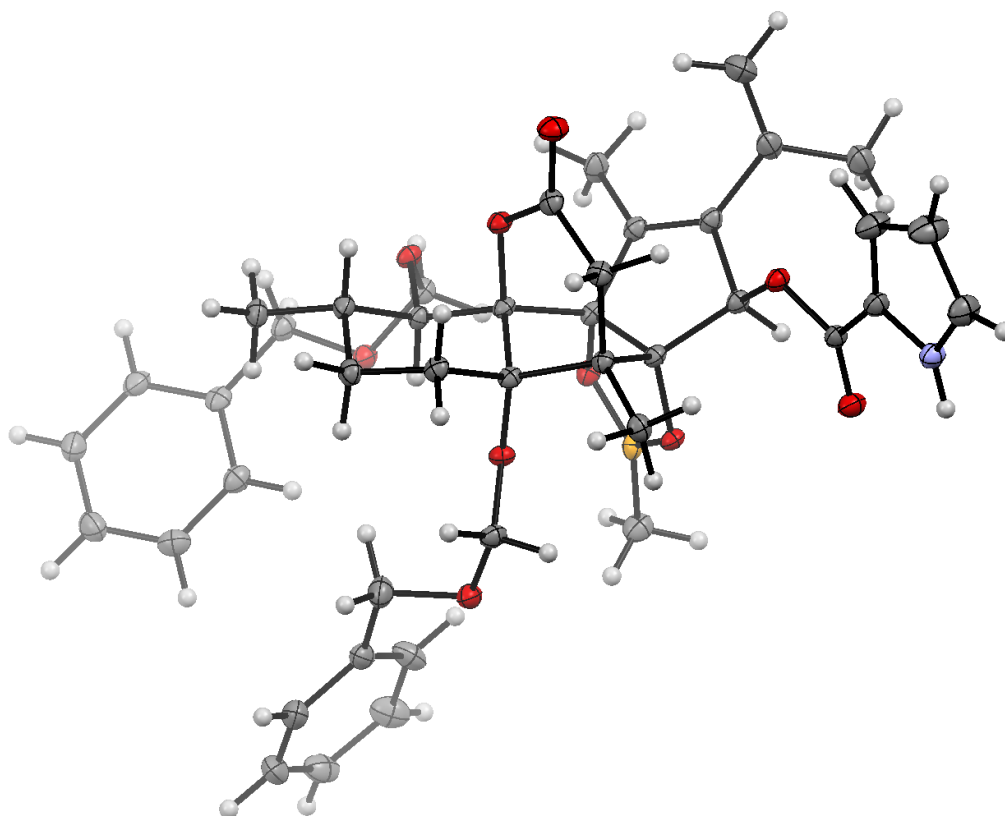

**Figure S1.** Structure of **16** with 50% probability anisotropic displacement ellipsoids.

### Special Refinement Details for **16**

Compound **16** crystallizes in the monoclinic space group  $P2_1$  with one molecule in the asymmetric unit. Absolute configuration was determined by anomalous dispersion ( $F_{\text{lack}} = 0.12(5)$ ).<sup>16</sup>

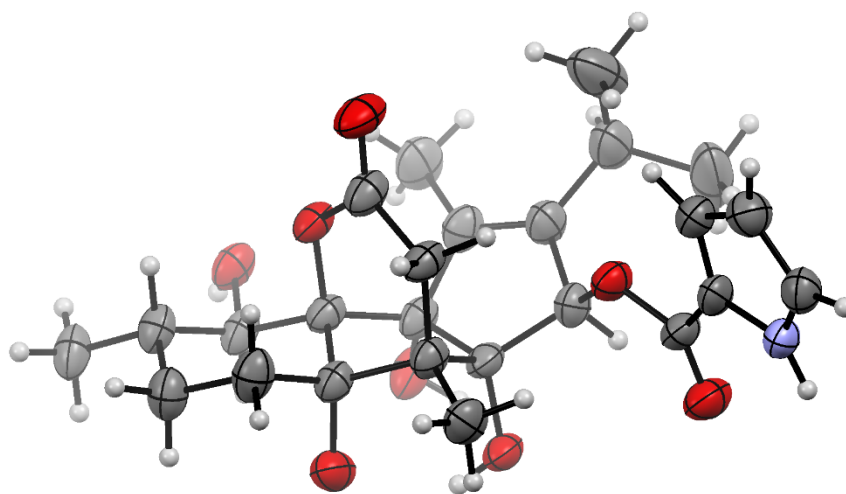

**Figure S2.** Structure of **18** with 50% probability anisotropic displacement ellipsoids.

### Special Refinement Details for **18**

Compound **6** crystallizes in the orthorhombic space group  $P2_12_12$  with one molecule in the asymmetric unit. The coordinates for the hydrogen atoms bound to N1, O5, O6, O7, and O8 were located in the difference Fourier synthesis, however, refinement was unstable and they were included into the model at geometrically calculated positions and refined using a riding model. A void analysis with the program PLATON<sup>17</sup> revealed the presence of two large voids and the program SQUEEZE<sup>18</sup> was used to remove the contribution of the disordered electron density inside this void from the structure factors. Absolute configuration was determined by anomalous dispersion (Flack = 0.23(12)).<sup>16</sup> Bayesian statistics further confirm the absolute stereochemistry:  $P2(\text{true}) = 1.000$ ,  $P3(\text{true}) = 0.977$ ,  $P3(\text{rac-twin}) = 0.023$ , and  $P3(\text{false}) = 0.2 \times 10^{-13}$ .<sup>17</sup>

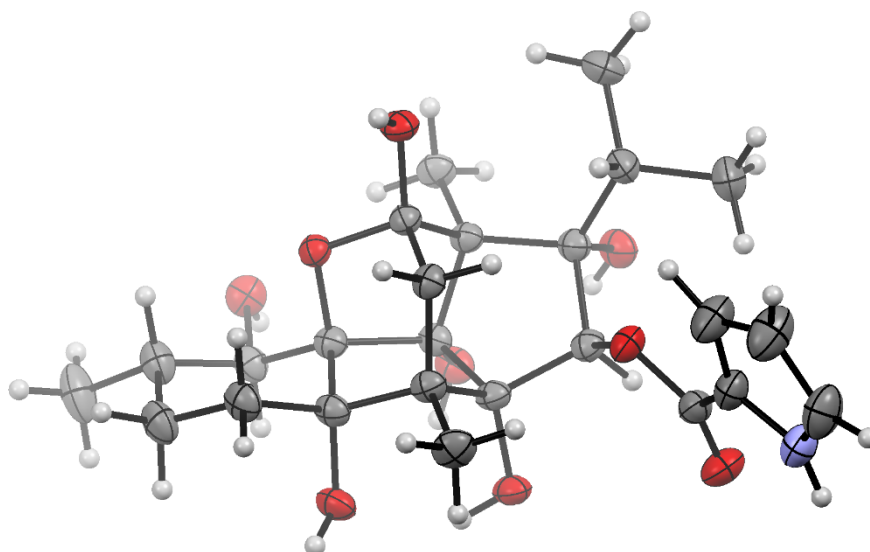

**Figure S3.** Structure of **1** with 50% probability anisotropic displacement ellipsoids. Co-crystallized diethyl ether and water molecules are omitted for clarity.

### Special Refinement Details for **1**

Compound **1** crystallizes in the orthorhombic space group  $P2_12_12_1$  with one molecule in the asymmetric unit, along with two molecules of diethyl ether and one molecule of water. One ether molecule was disordered over multiple positions, however refinement was unstable and the disorder was not included in the model. The bond distances of all hydrogen atoms bound to O and N atoms were refined with bond restraints. Absolute configuration was determined by anomalous dispersion ( $F_{\text{lack}} = 0.05(3)$ ).<sup>16</sup>

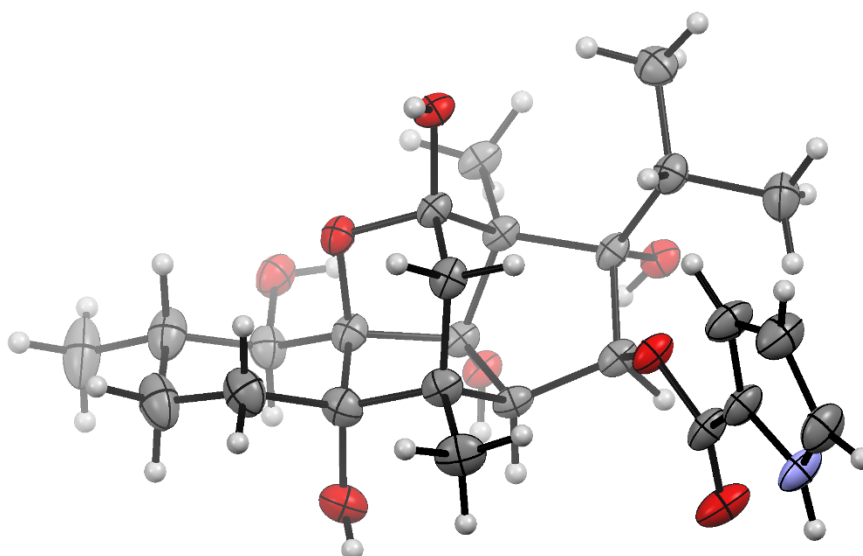

**Figure S4.** Structure of **3** with 50% probability anisotropic displacement ellipsoids. Co-crystallized diethyl ether, water, and the second molecule of **3** are omitted for clarity.

### Special Refinement Details for **3**

Compound **3** crystallizes in the trigonal space group  $P3_2$  with two molecules in the asymmetric unit, along with two molecules of diethyl ether and 0.38 molecules of water. One ether molecule was disordered over multiple positions, however refinement was unstable and the disorder was not included in the model. The highest electron density maxima was modeled as a partially occupied water (0.38). The hydrogen atoms for this water molecule were not located in the difference Fourier synthesis, and were included into the model at geometrically calculated positions that fulfilled H-bonding interactions and refined using a riding model. The bond distances of all hydrogen atoms bound to O and N atoms were refined with bond restraints. No hydrogen bond acceptor was found for H7A. Absolute configuration was determined by anomalous dispersion ( $Flack = 0.07(6)$ ).<sup>16</sup>

## 6. References

1. Deslongchamps, P.; Bélanger, A.; Berney, D. J. F.; Borschberg, H. J.; Brousseau, R.; Doutheau, A.; Durand, R.; Katayama, H.; Lapalme, R.; Leturc, D. M.; Liao, C. C.; MacLachlan, F. N.; Maffrand, J. P.; Marazza, F.; Martino, R.; Moreau, C.; Ruest, L.; Saint-Laurent, L.; Saintonge, R.; Soucy, P. "Total Synthesis of Ryanodol." *Can. J. Chem.* **1979**, *57*, 3348-3354.
2. Deslongchamps, P.; Bélanger, A.; Berney, D. J. F.; Borschberg, H. J.; Brousseau, R.; Doutheau, A.; Durand, R.; Katayama, H.; Lapalme, R.; Leturc, D. M.; Liao, C. C.; MacLachlan, F. N.; Maffrand, J. P.; Marazza, F.; Martino, R.; Moreau, C.; Ruest, L.; Saint-Laurent, L.; Saintonge, R.; Soucy, P. "The Total Synthesis of (+)-Ryanodol. 1. General Strategy and Search for a Convenient Diene for the Construction of a Key Tricyclic Intermediate." *Can. J. Chem.* **1990**, *68*, 115-126.
3. Deslongchamps, P.; Bélanger, A.; Berney, D. J. F.; Borschberg, H. J.; Brousseau, R.; Doutheau, A.; Durand, R.; Katayama, H.; Lapalme, R.; Leturc, D. M.; Liao, C. C.; MacLachlan, F. N.; Maffrand, J. P.; Marazza, F.; Martino, R.; Moreau, C.; Ruest, L.; Saint-Laurent, L.; Saintonge, R.; Soucy, P. "The Total Synthesis of (+)-Ryanodol. 2. Model Studies for Ring B and Ring C of (+)-Anhydroryanodol. Preparation of a Key Pentacyclic Intermediate." *Can. J. Chem.* **1990**, *68*, 127-152.
4. Deslongchamps, P.; Bélanger, A.; Berney, D. J. F.; Borschberg, H. J.; Brousseau, R.; Doutheau, A.; Durand, R.; Katayama, H.; Lapalme, R.; Leturc, D. M.; Liao, C. C.; MacLachlan, F. N.; Maffrand, J. P.; Marazza, F.; Martino, R.; Moreau, C.; Ruest, L.; Saint-Laurent, L.; Saintonge, R.; Soucy, P. "The Total Synthesis of (+)-Ryanodol. 3. Preparation of (+)-Anhydroryanodol from a Key Pentacyclic Intermediate." *Can. J. Chem.* **1990**, *68*, 153-185.
5. Deslongchamps, P.; Bélanger, A.; Berney, D. J. F.; Borschberg, H. J.; Brousseau, R.; Doutheau, A.; Durand, R.; Katayama, H.; Lapalme, R.; Leturc, D. M.; Liao, C. C.; MacLachlan, F. N.; Maffrand, J. P.; Marazza, F.; Martino, R.; Moreau, C.; Ruest, L.; Saint-Laurent, L.; Saintonge, R.; Soucy, P. "The Total Synthesis of (+)-Ryanodol. 4. Preparation of (+)-Ryanodol from (+)-Anhydroryanodol." *Can. J. Chem.* **1990**, *68*, 186-192.
6. Nagatomo, M.; Koshimizu, M.; Masuda, K.; Tabuchi, T.; Urabe, D.; Inoue, M. "Total Synthesis of Ryanodol." *J. Am. Chem. Soc.* **2014**, *136*, 5916-5919.
7. Nagatomo, M.; Hagiwara, K.; Masuda, K.; Koshimizu, M.; Kawamata, T.; Matsui, Y.; Urabe, D.; Inoue, M. "Symmetry-Driven Strategy for the Assembly of the Core Tetracycle of (+)-Ryanodine: Synthetic Utility of a Cobalt-Catalyzed Olefin Oxidation and  $\alpha$ -Alkoxy Bridgehead Radical Reaction." *Chem. Eur. J.* **2016**, *22*, 222-229.
8. Masuda, K.; Koshimizu, M.; Nagatomo, M.; Inoue, M. "Asymmetric Total Synthesis of (+)-Ryanodol and (+)-Ryanodine." *Chem. Eur. J.* **2016**, *22*, 230-236.
9. Masuda, K.; Nagatomo, M.; Inoue, M. "Chemical Conversion of Ryanodol to Ryanodine." *Chem. Pharm. Bull.* **2016**, *64*, 874-879.
10. Donohoe, T. J.; House, D. "Ammonia free partial reduction of aromatic compounds using lithium di-tert-butylbiphenyl (LiDBB)." *J. Org. Chem.* **2002**, *67*, 5015-5018.
11. Hübner, H.; Vierling, W.; Brandt, W.; Reiter, M.; Achenbach, H. "Minor constituents of *Spigelia anthelmia* and their cardiac activities." *Phytochemistry* **2001**, *57*, 285-296.
12. APEX2, Version 2 User Manual, M86-E01078. Bruker Analytical X-ray Systems: Madison, WI.



13. Sheldrick, G. M. SADABS (version 2008/1): Program for Absorption Correction for Data from Area Detector Frames. University of Göttingen, 2008.
14. Sheldrick, G. M. "A short history of SHELX." *Acta Cryst.* **2008**, *64*, 112-122.
15. Müller, P. "Practical suggestions for better crystal structures." *Crystallogr. Rev.* **2009**, *15*, 57-83.
16. Parsons, S.; Flack, H. D.; Wagner, T. "Use of intensity quotients and differences in absolute structure refinement." *Acta Cryst.* **2013**, *69*, 249-259.
17. Spek, A. L. "Structure validation in chemical crystallography." *Acta Cryst.* **2009**, *65*, 148-155.
18. Vandersluis, P.; Spek, A. L. "Bypass: An Effective Method for the Refinement of Crystal-Structures Containing Disordered Solvent Regions." *Acta Cryst.* **1990**, *46*, 194-201.

# 7. <sup>1</sup>H and <sup>13</sup>C NMR Spectral Data

Data File Name / Volumes/nmrdata/ chenxu91/ nmr/ xuchen-160723-10-49-flashed/ 1/ fid  
 Title xuchen-160723-10-49-flashed.1.fid  
 Origin Bruker BioSpin GmbH  
 Solvent CDCl<sub>3</sub>  
 Temperature 294.9  
 Pulse Sequence zg30  
 Number of Scans 16  
 Receiver Gain 156.2  
 Relaxation Delay 1.0000  
 Pulse Width 11.7000  
 Acquisition Time 4.0894  
 Acquisition Date 2016-07-23T11:50:11  
 Spectrometer Frequency 400.13  
 Spectral Width 8012.8  
 Lowest Frequency -1545.6  
 Nucleus <sup>1</sup>H  
 Acquired Size 32768  
 Spectral Size 65536

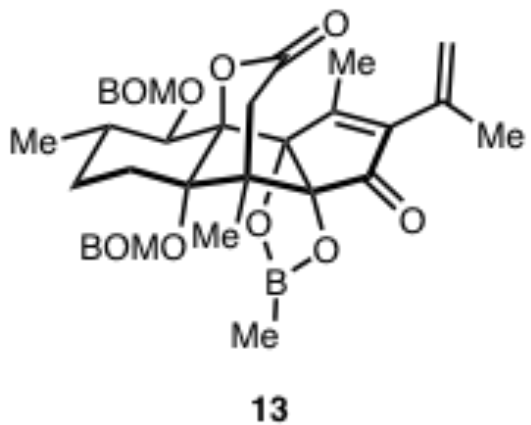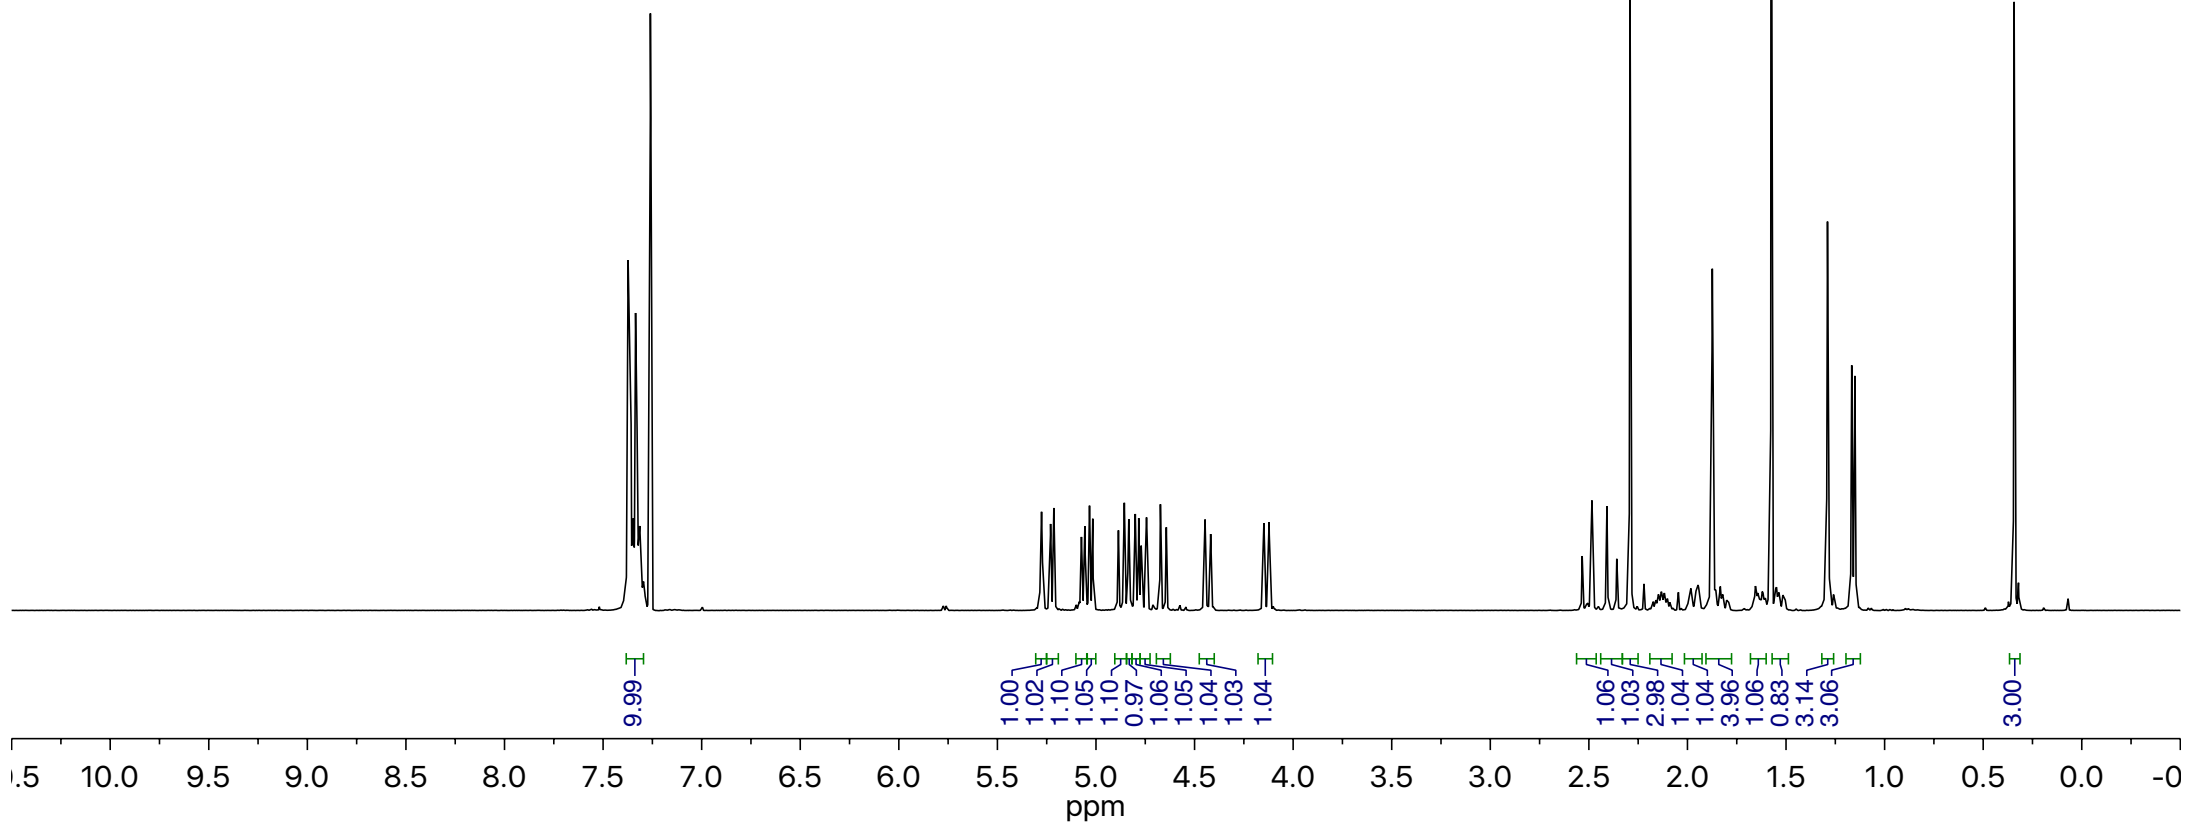

| Parameter              | Value                                                                  |
|------------------------|------------------------------------------------------------------------|
| Data File Name         | / Volumes/ nmrdata/ chenxu91/ nmr/ xuchen-160723-10-49-flashed/ 2/ fid |
| Title                  | xuchen-160723-10-49-flashed.2.fid                                      |
| Origin                 | Bruker BioSpin GmbH                                                    |
| Solvent                | CDCl <sub>3</sub>                                                      |
| Temperature            | 294.9                                                                  |
| Pulse Sequence         | zgpg30                                                                 |
| Number of Scans        | 1024                                                                   |
| Receiver Gain          | 72.0                                                                   |
| Relaxation Delay       | 2.0000                                                                 |
| Pulse Width            | 10.0000                                                                |
| Acquisition Time       | 1.3631                                                                 |
| Acquisition Date       | 2016-07-23T12:49:19                                                    |
| Spectrometer Frequency | 100.62                                                                 |
| Spectral Width         | 24038.5                                                                |
| Lowest Frequency       | -1958.4                                                                |
| Nucleus                | <sup>13</sup> C                                                        |
| Acquired Size          | 32768                                                                  |
| Spectral Size          | 65536                                                                  |

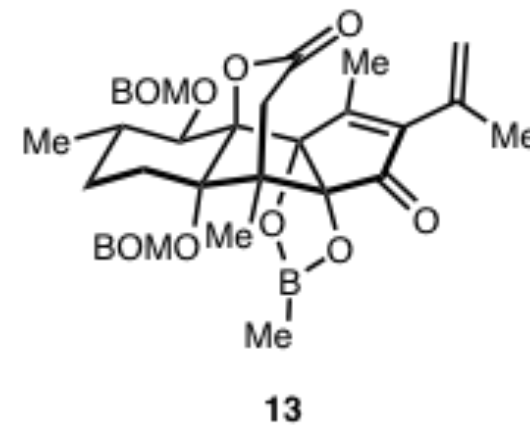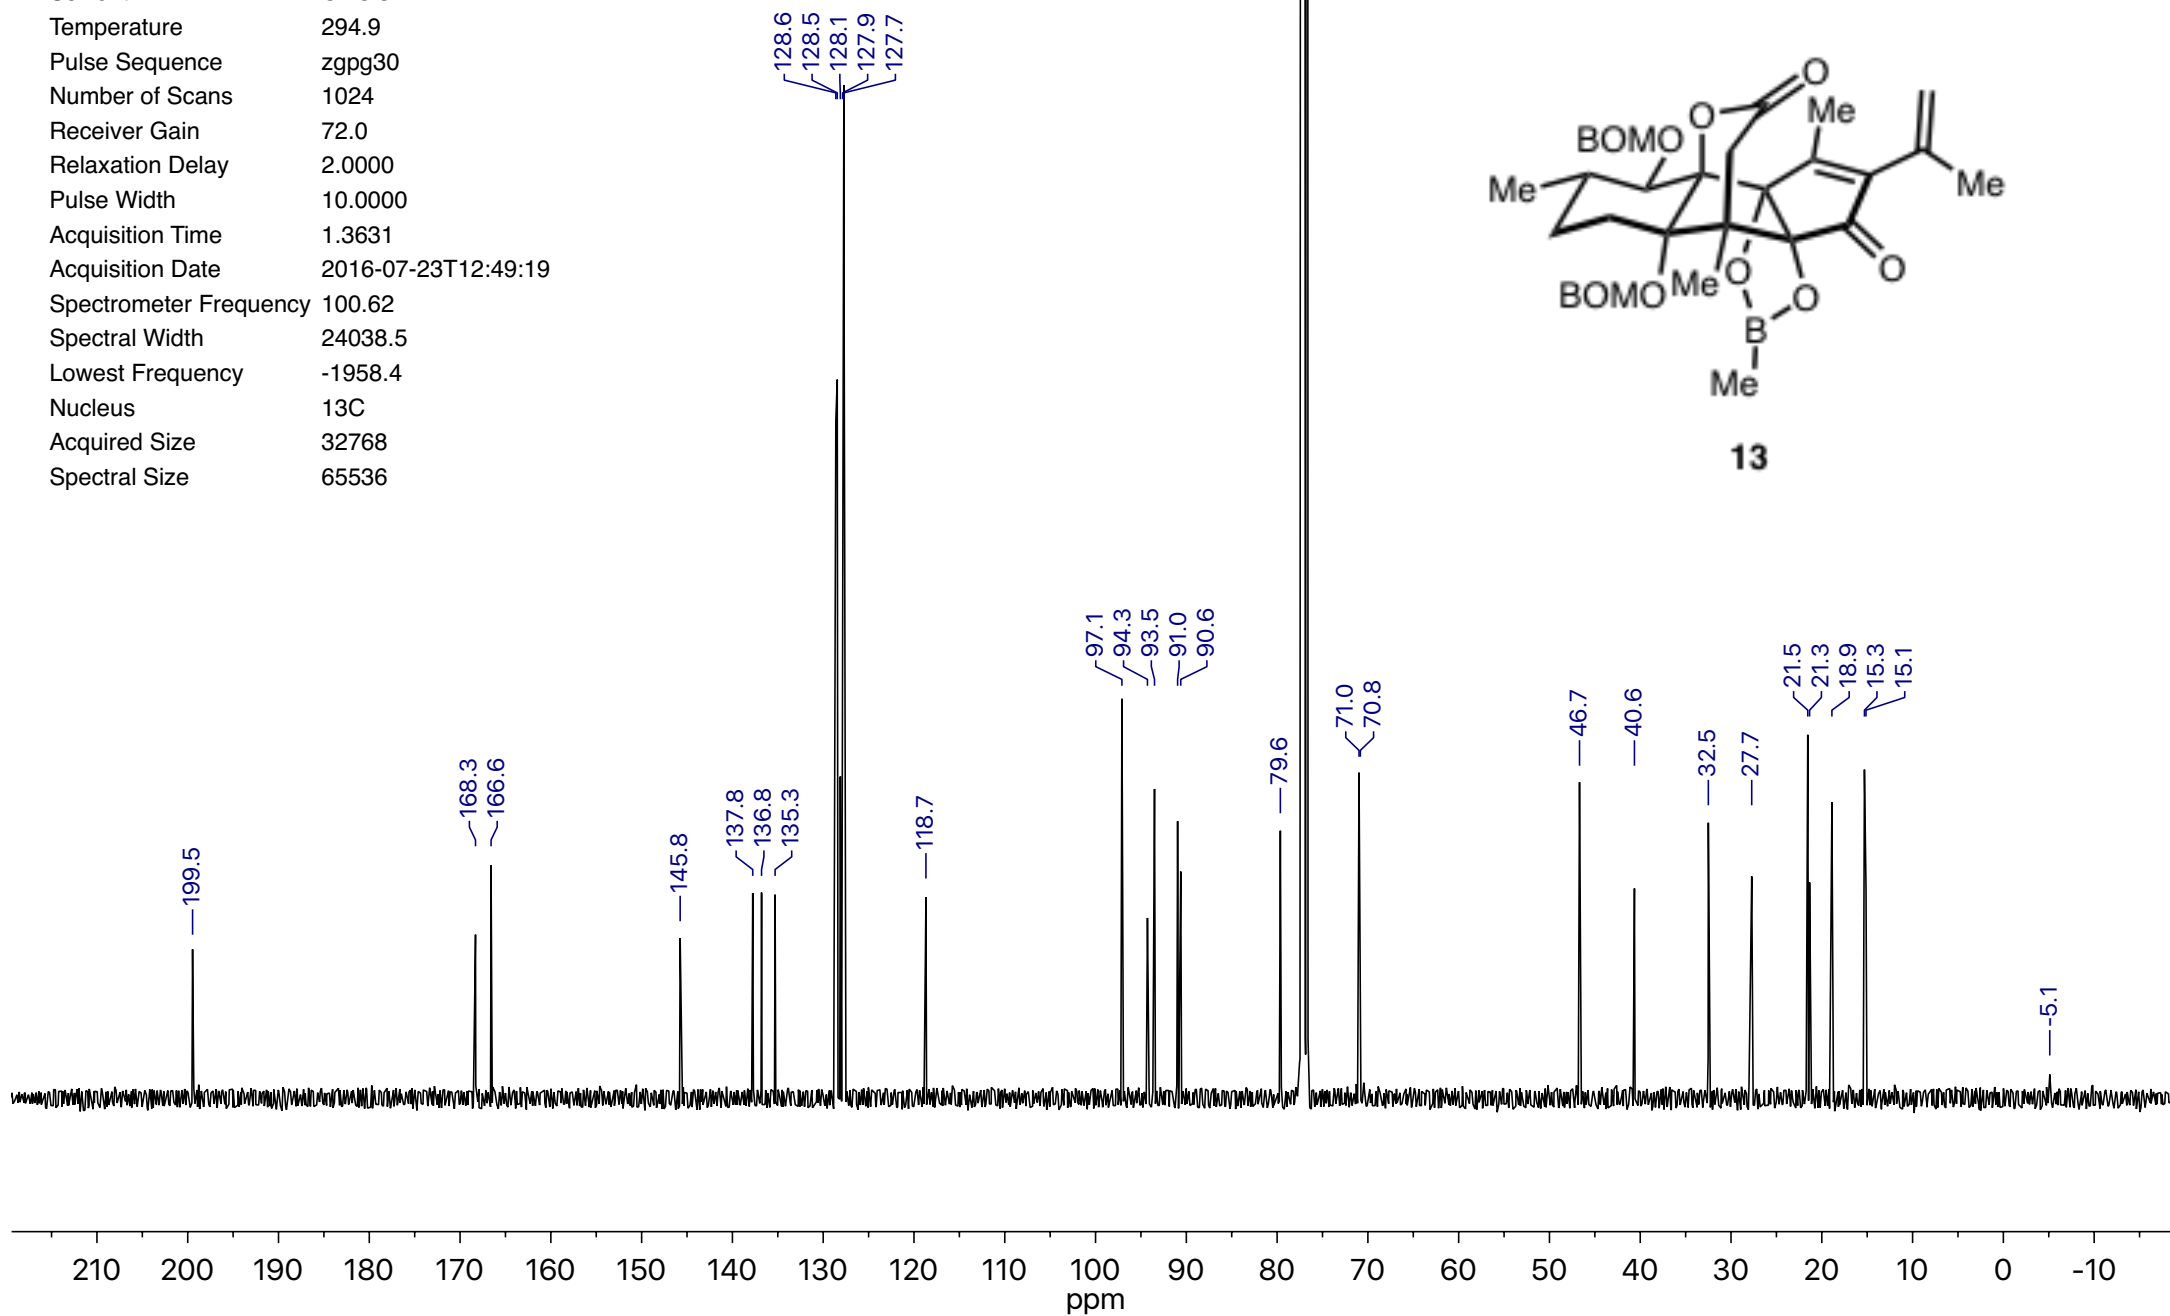

| Parameter              | Value                                                   |
|------------------------|---------------------------------------------------------|
| Data File Name         | /Volumes/nmrdata/chenxu91/nmr/xuchen-160724-10-50/1/fid |
| Title                  | xuchen-160724-10-50.1.fid                               |
| Origin                 | Bruker BioSpin GmbH                                     |
| Solvent                | CDCl3                                                   |
| Temperature            | 295.0                                                   |
| Pulse Sequence         | zg30                                                    |
| Number of Scans        | 16                                                      |
| Receiver Gain          | 156.2                                                   |
| Relaxation Delay       | 1.0000                                                  |
| Pulse Width            | 11.7000                                                 |
| Acquisition Time       | 4.0894                                                  |
| Acquisition Date       | 2016-07-24T16:26:13                                     |
| Spectrometer Frequency | 400.13                                                  |
| Spectral Width         | 8012.8                                                  |
| Lowest Frequency       | -1545.6                                                 |
| Nucleus                | 1H                                                      |
| Acquired Size          | 32768                                                   |
| Spectral Size          | 65536                                                   |

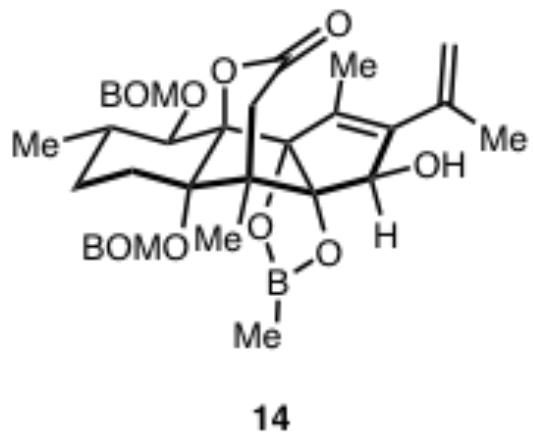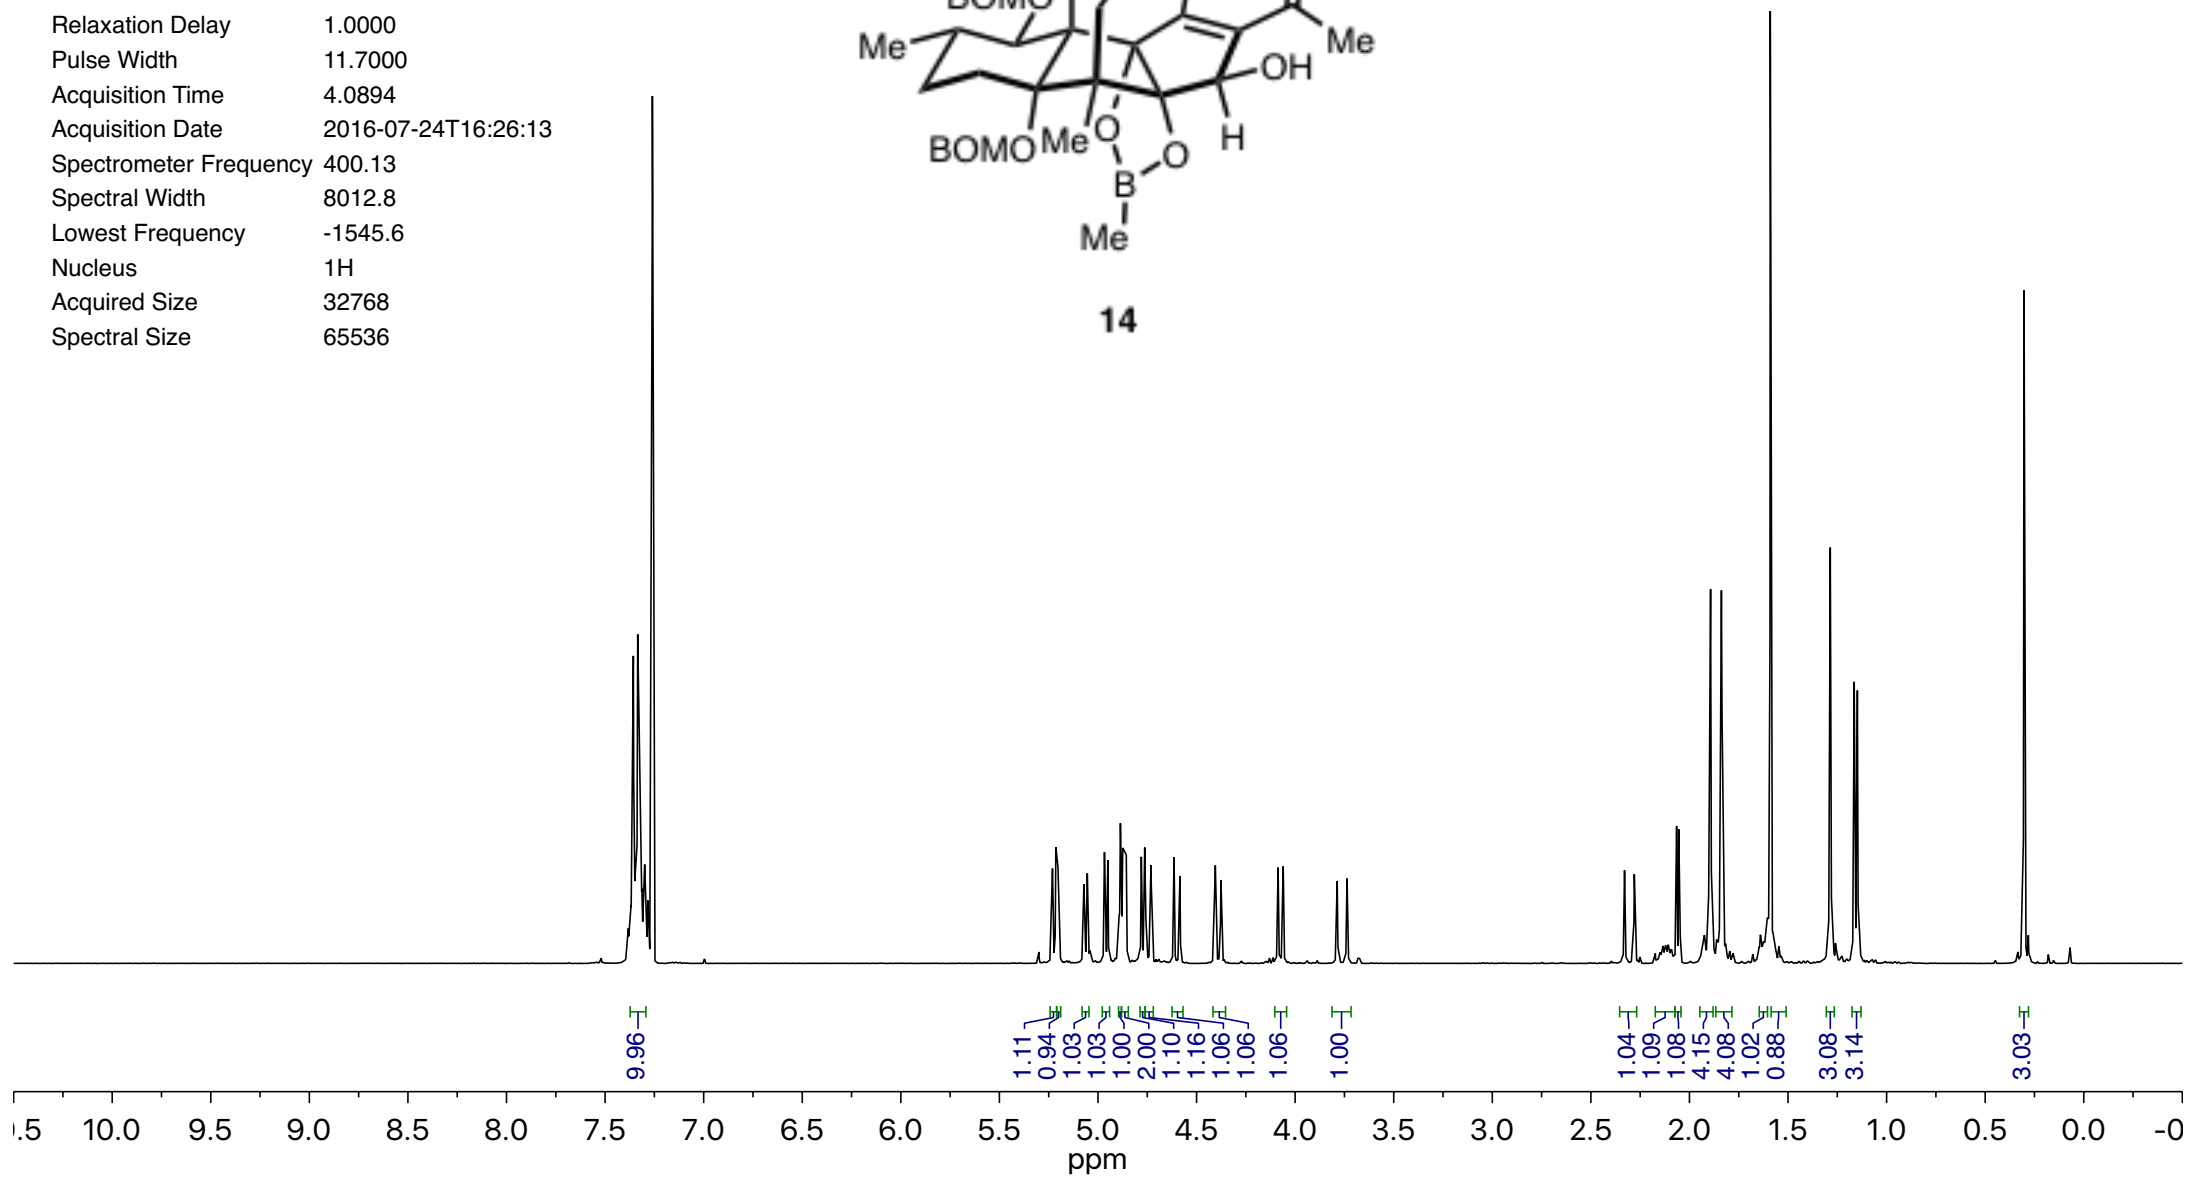

| Parameter              | Value                                                   |
|------------------------|---------------------------------------------------------|
| Data File Name         | /Volumes/nmrdata/chenxu91/nmr/xuchen-160724-10-50/2/fid |
| Title                  | xuchen-160724-10-50.2.fid                               |
| Origin                 | Bruker BioSpin GmbH                                     |
| Solvent                | CDCl3                                                   |
| Temperature            | 295.0                                                   |
| Pulse Sequence         | zgpg30                                                  |
| Number of Scans        | 1024                                                    |
| Receiver Gain          | 72.0                                                    |
| Relaxation Delay       | 2.0000                                                  |
| Pulse Width            | 10.0000                                                 |
| Acquisition Time       | 1.3631                                                  |
| Acquisition Date       | 2016-07-24T17:25:20                                     |
| Spectrometer Frequency | 100.62                                                  |
| Spectral Width         | 24038.5                                                 |
| Lowest Frequency       | -1961.8                                                 |
| Nucleus                | <sup>13</sup> C                                         |
| Acquired Size          | 32768                                                   |
| Spectral Size          | 65536                                                   |

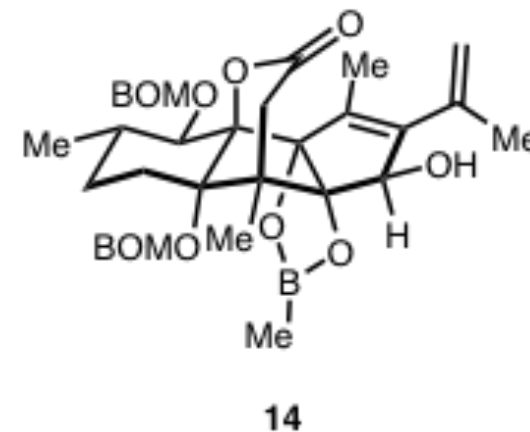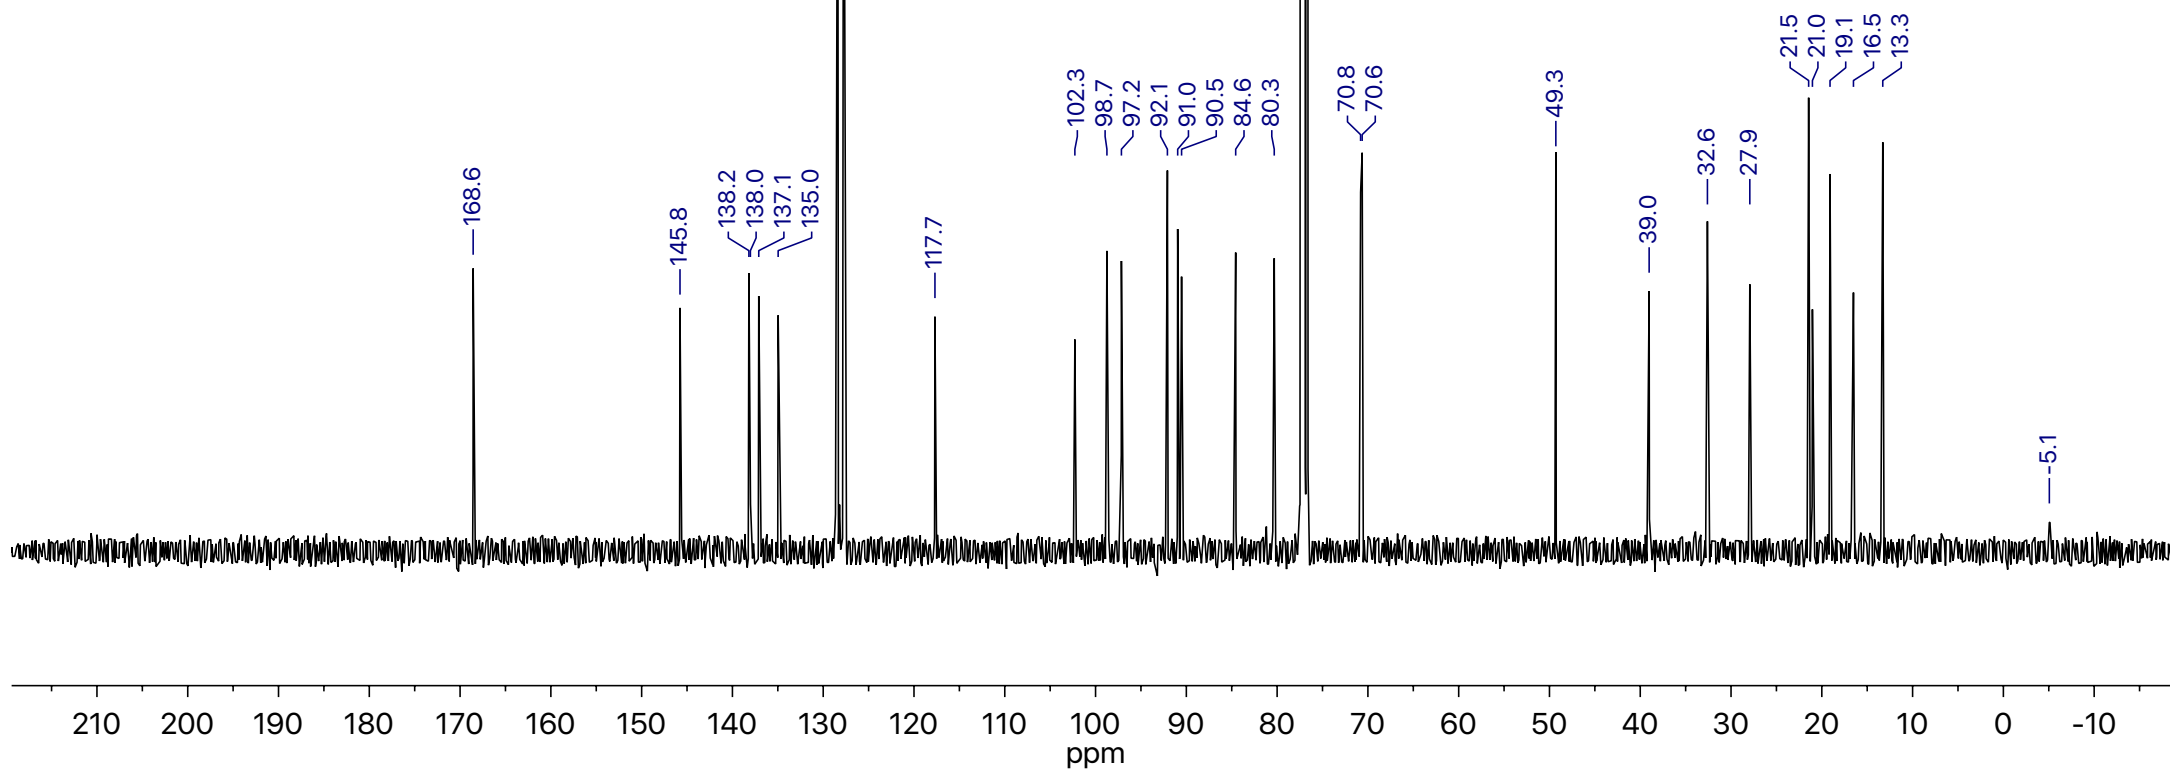

| Parameter              | Value                                                     |
|------------------------|-----------------------------------------------------------|
| Data File Name         | /Volumes/nmrdata/chenxu91/nmr/xuchen-160611-10-28-3/1/fid |
| Title                  | xuchen-160611-10-28-3.1.fid                               |
| Origin                 | Bruker BioSpin GmbH                                       |
| Solvent                | CDCl3                                                     |
| Temperature            | 295.0                                                     |
| Pulse Sequence         | zg30                                                      |
| Number of Scans        | 16                                                        |
| Receiver Gain          | 87.8                                                      |
| Relaxation Delay       | 1.0000                                                    |
| Pulse Width            | 11.7000                                                   |
| Acquisition Time       | 4.0894                                                    |
| Acquisition Date       | 2016-07-11T13:53:53                                       |
| Spectrometer Frequency | 400.13                                                    |
| Spectral Width         | 8012.8                                                    |
| Lowest Frequency       | -1545.6                                                   |
| Nucleus                | <sup>1</sup> H                                            |
| Acquired Size          | 32768                                                     |
| Spectral Size          | 65536                                                     |

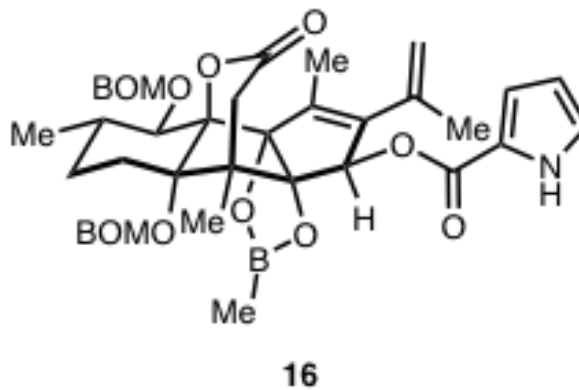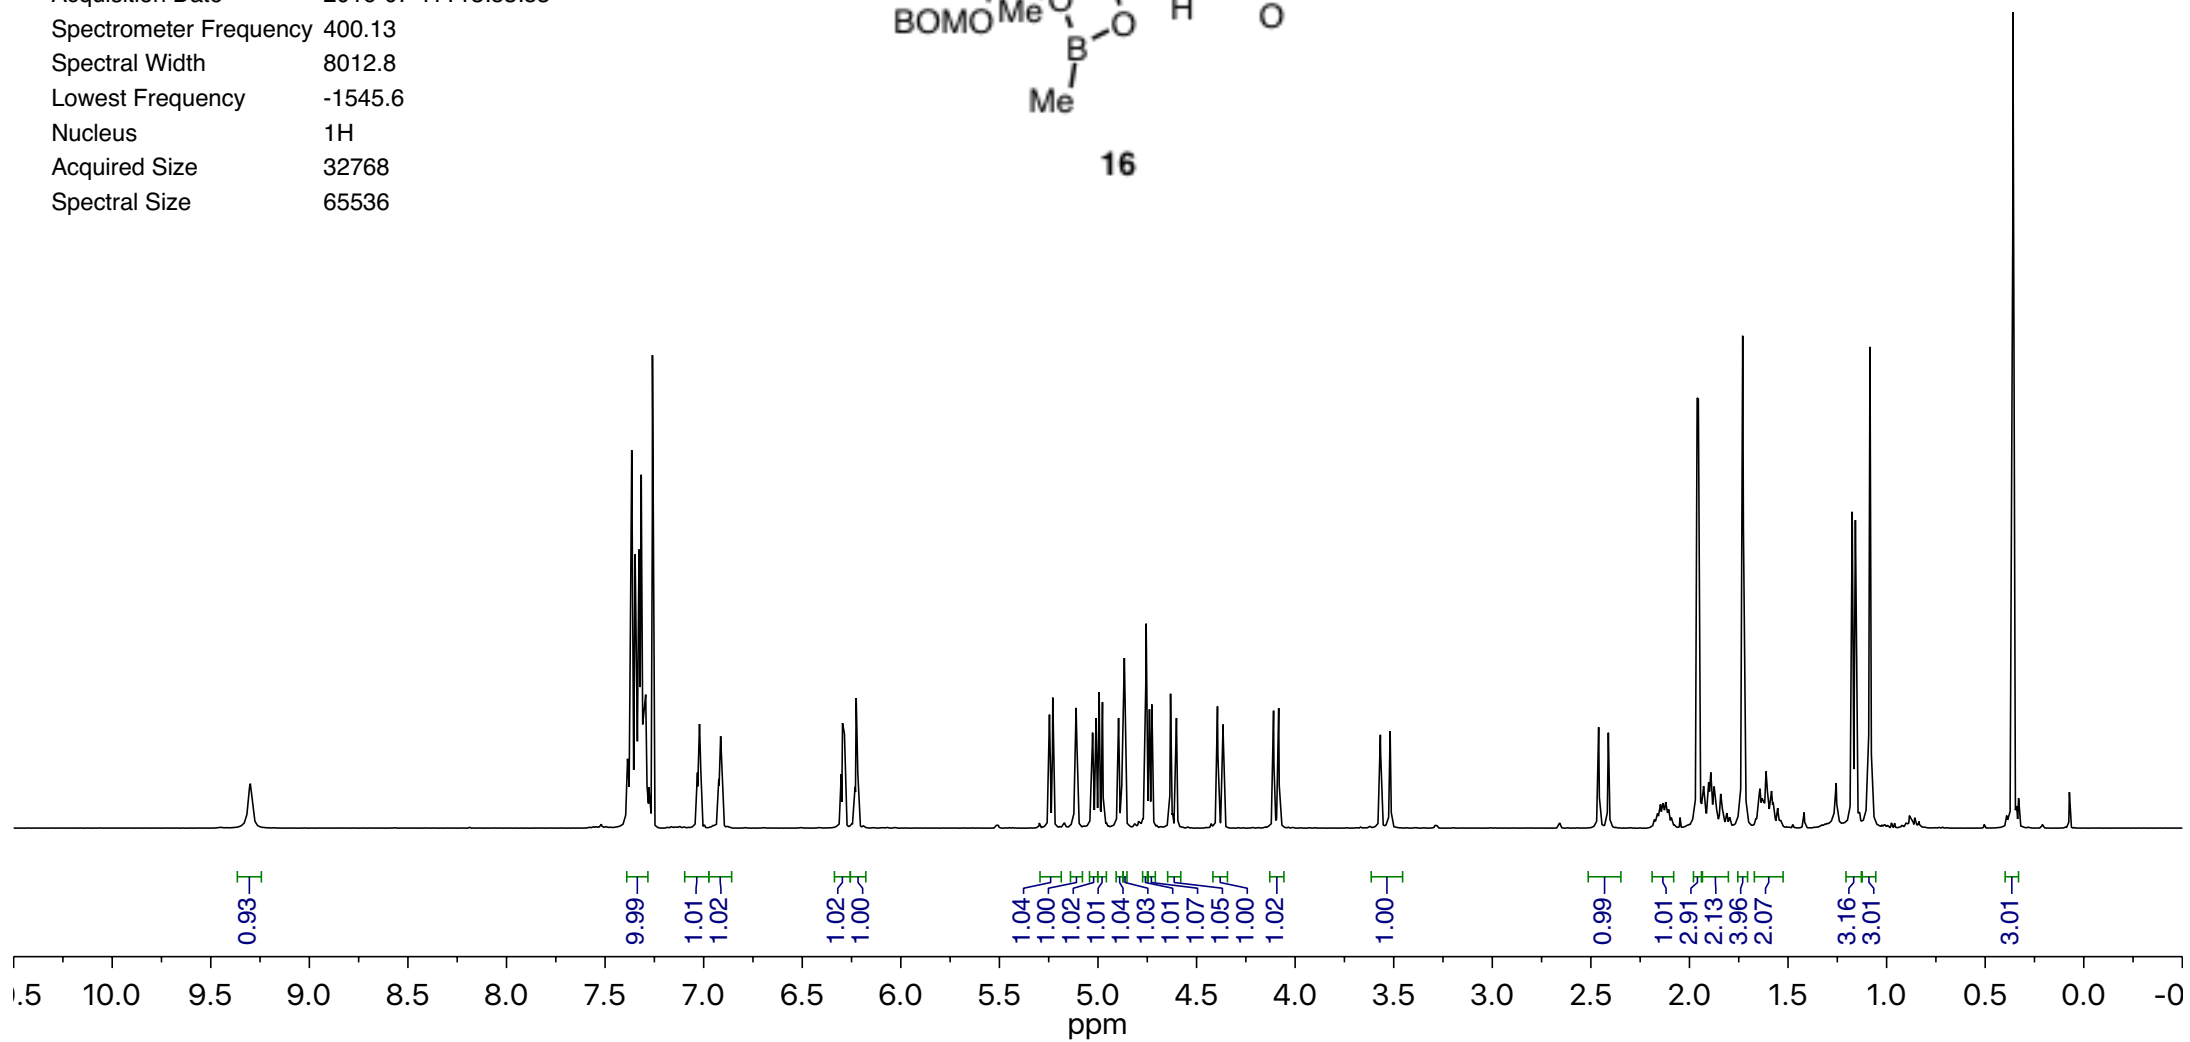

| Parameter              | Value                                                     |
|------------------------|-----------------------------------------------------------|
| Data File Name         | /Volumes/nmrdata/chenxu91/nmr/xuchen-160611-10-28-3/2/fid |
| Title                  | xuchen-160611-10-28-3.2.fid                               |
| Origin                 | Bruker BioSpin GmbH                                       |
| Solvent                | CDCl <sub>3</sub>                                         |
| Temperature            | 294.9                                                     |
| Pulse Sequence         | zgpg30                                                    |
| Number of Scans        | 1024                                                      |
| Receiver Gain          | 78.7                                                      |
| Relaxation Delay       | 2.0000                                                    |
| Pulse Width            | 10.0000                                                   |
| Acquisition Time       | 1.3631                                                    |
| Acquisition Date       | 2016-07-11T14:53:00                                       |
| Spectrometer Frequency | 100.62                                                    |
| Spectral Width         | 24038.5                                                   |
| Lowest Frequency       | -1962.9                                                   |
| Nucleus                | <sup>13</sup> C                                           |
| Acquired Size          | 32768                                                     |
| Spectral Size          | 65536                                                     |

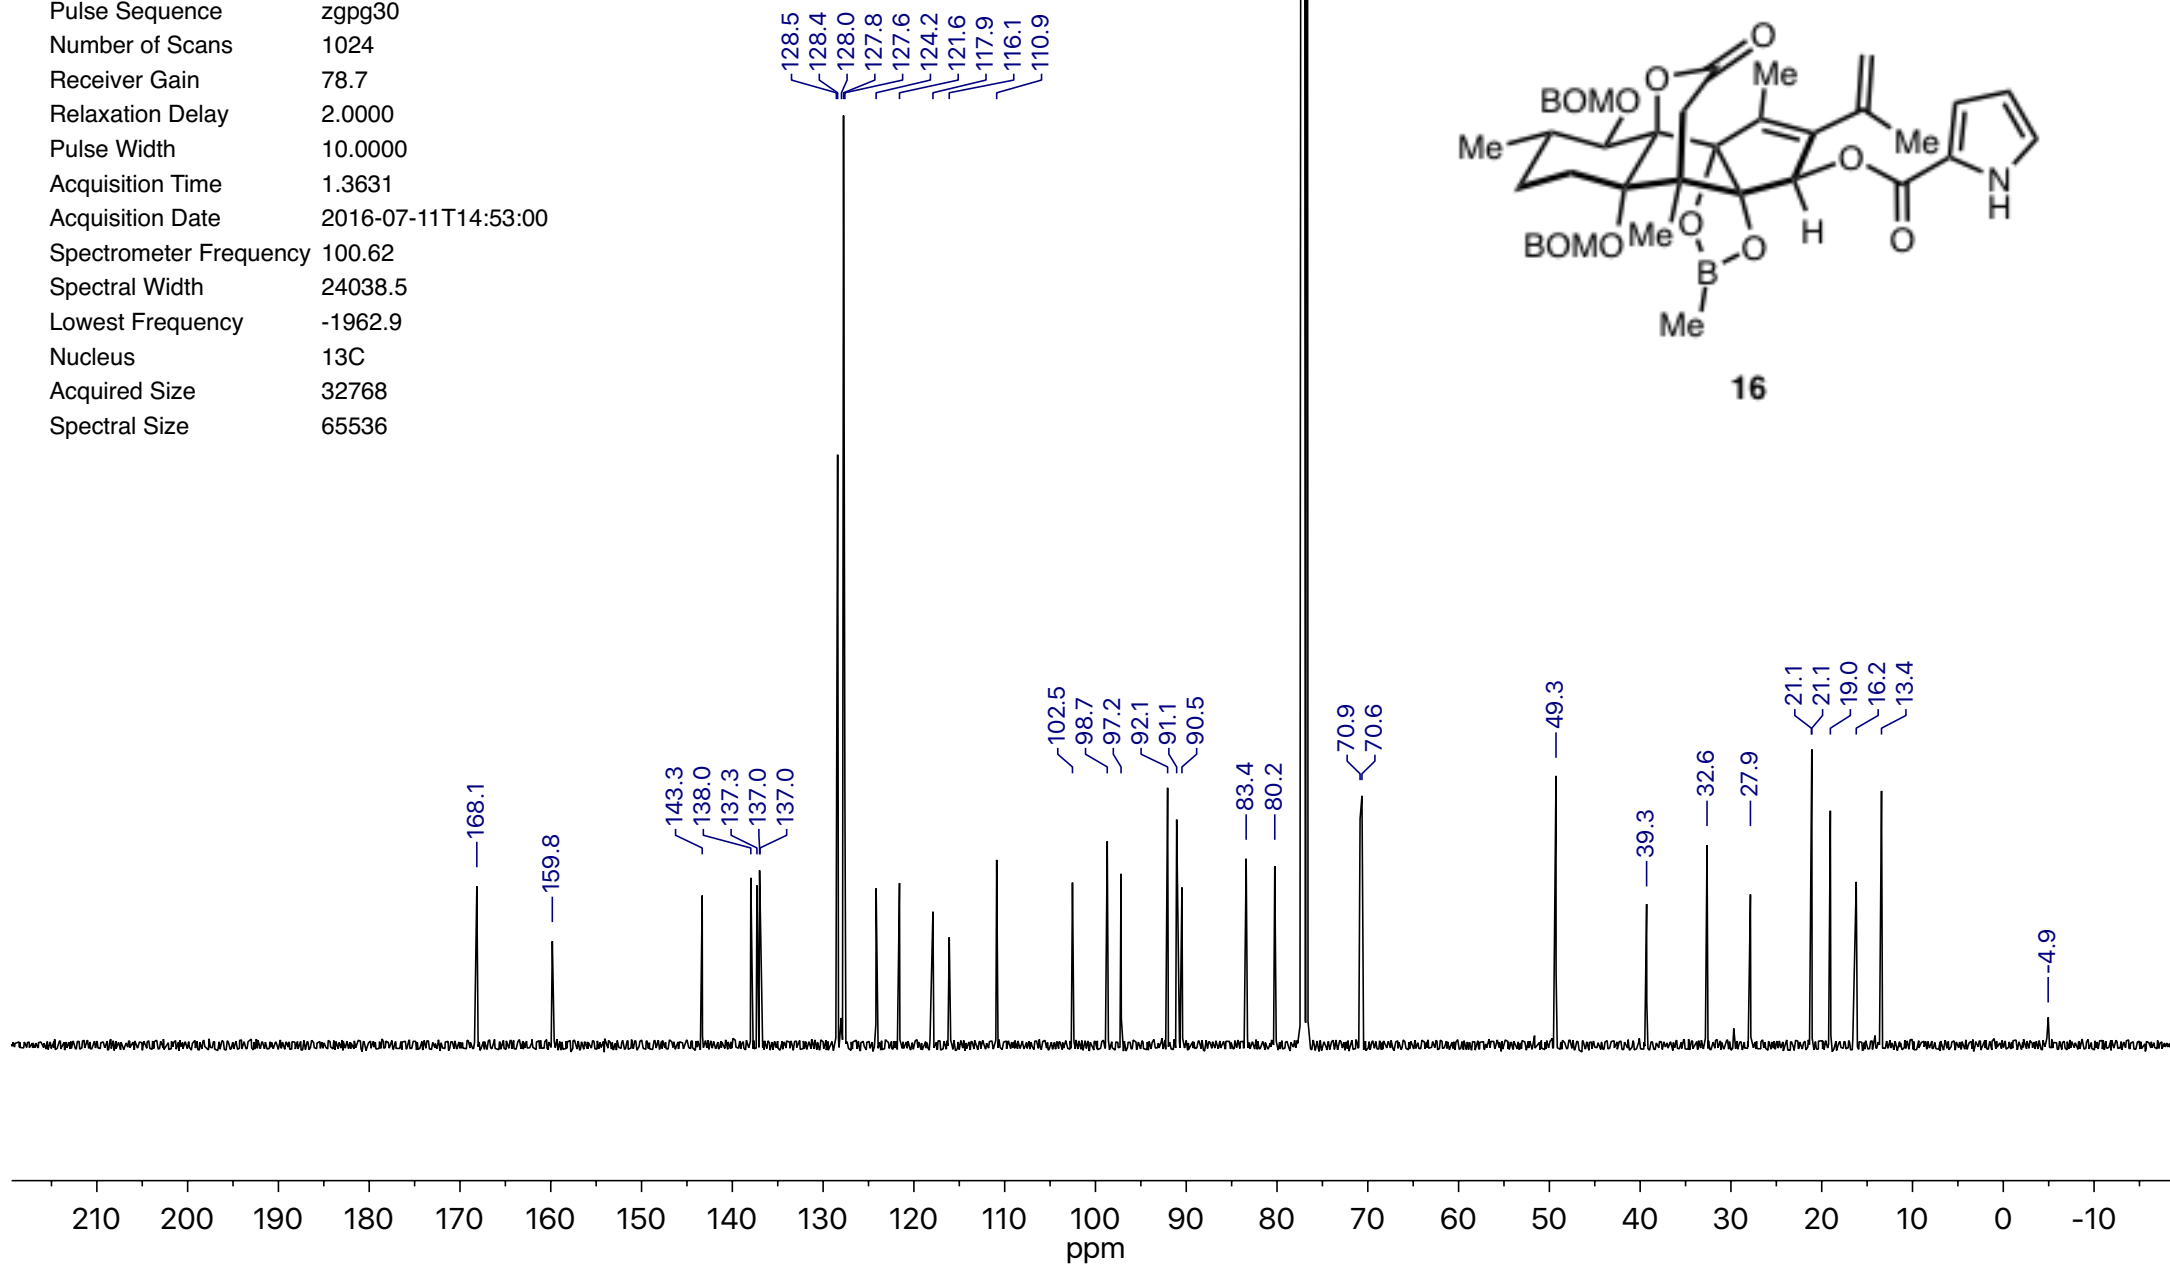

| Parameter              | Value                                                             |
|------------------------|-------------------------------------------------------------------|
| Data File Name         | /Volumes/nmrdata/chenxu91/nmr/xuchen-160713-10-28-2-flashed/1/fid |
| Title                  | xuchen-160713-10-28-2-flashed.1.fid                               |
| Origin                 | Bruker BioSpin GmbH                                               |
| Solvent                | CDCl3                                                             |
| Temperature            | 294.9                                                             |
| Pulse Sequence         | zg30                                                              |
| Number of Scans        | 16                                                                |
| Receiver Gain          | 112.8                                                             |
| Relaxation Delay       | 1.0000                                                            |
| Pulse Width            | 11.7000                                                           |
| Acquisition Time       | 4.0894                                                            |
| Acquisition Date       | 2016-07-14T00:40:45                                               |
| Spectrometer Frequency | 400.13                                                            |
| Spectral Width         | 8012.8                                                            |
| Lowest Frequency       | -1545.2                                                           |
| Nucleus                | 1H                                                                |
| Acquired Size          | 32768                                                             |
| Spectral Size          | 65536                                                             |

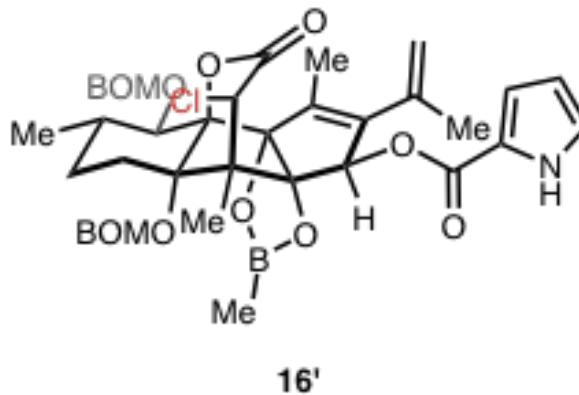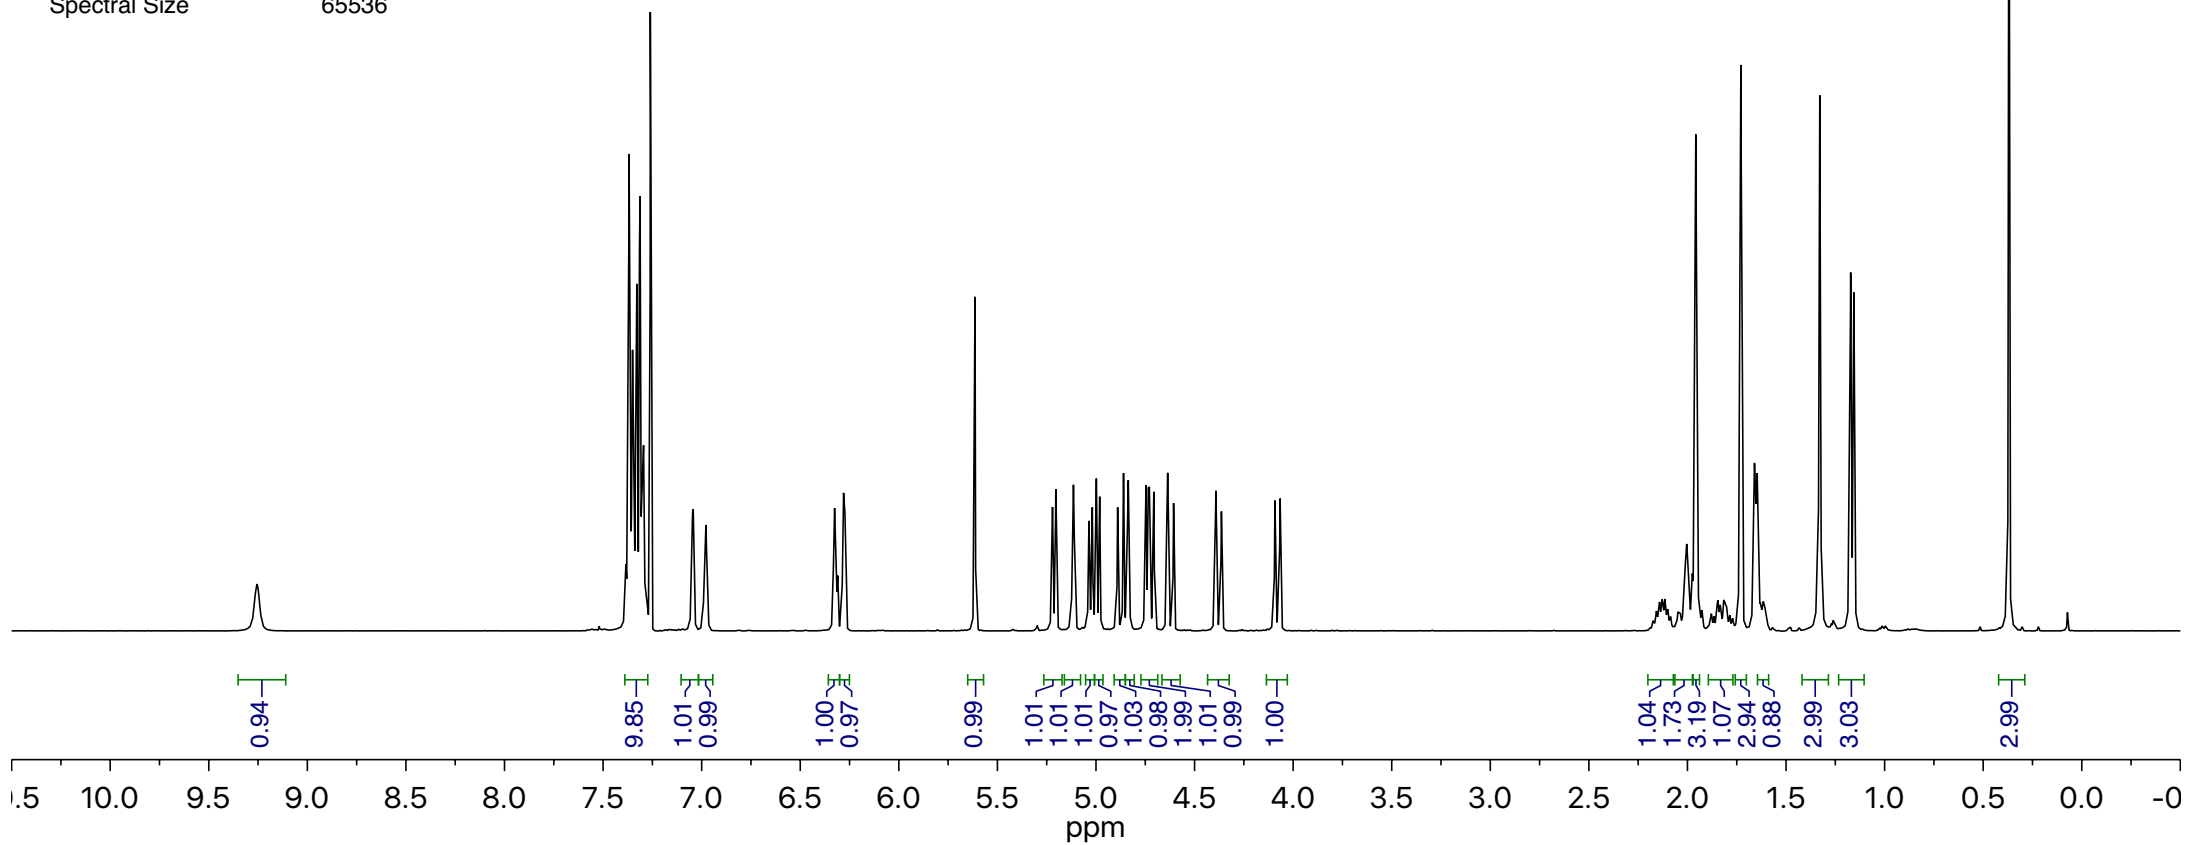



| Parameter              | Value                                                                    |
|------------------------|--------------------------------------------------------------------------|
| Data File Name         | / Volumes/ nmrdata/ chenxu91/ nmr/ xuchen-160713-10-28-2-flashed/ 2/ fid |
| Title                  | xuchen-160713-10-28-2-flashed.2.fid                                      |
| Origin                 | Bruker BioSpin GmbH                                                      |
| Solvent                | CDCl <sub>3</sub>                                                        |
| Temperature            | 295.0                                                                    |
| Pulse Sequence         | zgpg30                                                                   |
| Number of Scans        | 700                                                                      |
| Receiver Gain          | 38.0                                                                     |
| Relaxation Delay       | 2.0000                                                                   |
| Pulse Width            | 10.0000                                                                  |
| Acquisition Time       | 1.3631                                                                   |
| Acquisition Date       | 2016-07-14T01:21:53                                                      |
| Spectrometer Frequency | 100.62                                                                   |
| Spectral Width         | 24038.5                                                                  |
| Lowest Frequency       | -1962.6                                                                  |
| Nucleus                | <sup>13</sup> C                                                          |
| Acquired Size          | 32768                                                                    |
| Spectral Size          | 65536                                                                    |

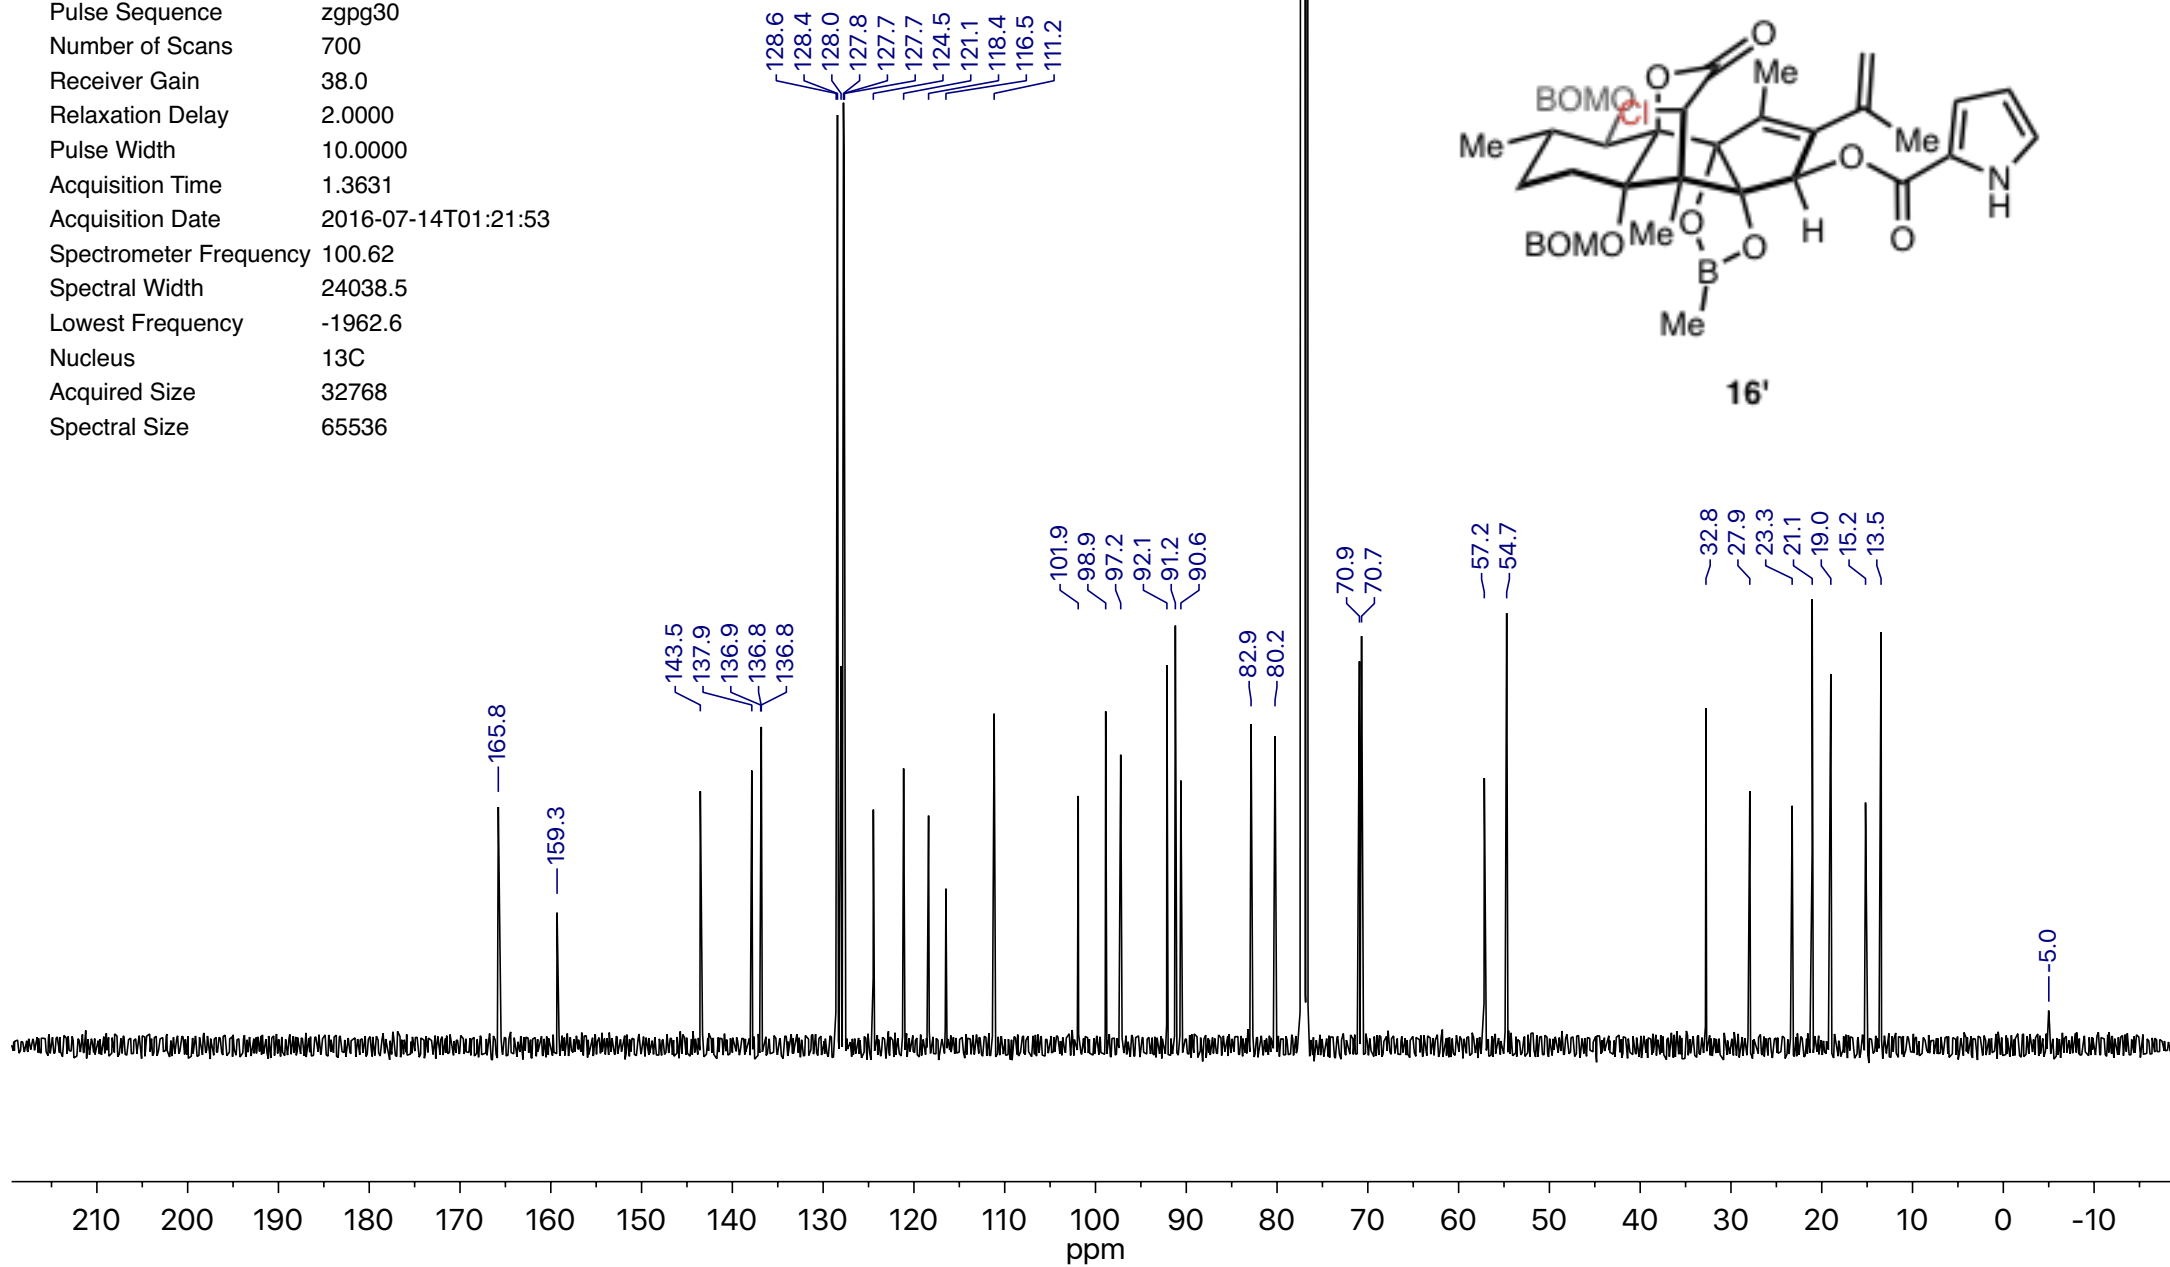

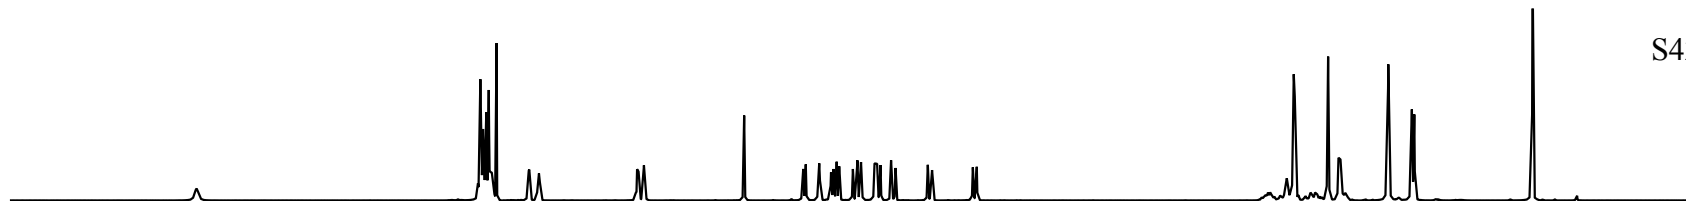

| Parameter              | Value                                                                    |
|------------------------|--------------------------------------------------------------------------|
| Data File Name         | / Volumes/ nmrdata/ chenxu91/ nmr/ xuchen-160713-10-28-2-flashed/ 5/ ser |
| Title                  | xuchen-160713-10-28-2-flashed.5.ser                                      |
| Origin                 | Bruker BioSpin GmbH                                                      |
| Solvent                | CDCl3                                                                    |
| Temperature            | 295.0                                                                    |
| Pulse Sequence         | noesygpphzs                                                              |
| Number of Scans        | 4                                                                        |
| Receiver Gain          | 64.2                                                                     |
| Relaxation Delay       | 2.0287                                                                   |
| Pulse Width            | 11.7000                                                                  |
| Acquisition Time       | 0.2273                                                                   |
| Acquisition Date       | 2016-07-14T01:41:50                                                      |
| Spectrometer Frequency | (400.13, 400.13)                                                         |
| Spectral Width         | (4504.5, 4504.5)                                                         |
| Lowest Frequency       | (-304.5, -304.5)                                                         |
| Nucleus                | (1H, 1H)                                                                 |
| Acquired Size          | (1024, 256)                                                              |
| Spectral Size          | (1024, 1024)                                                             |

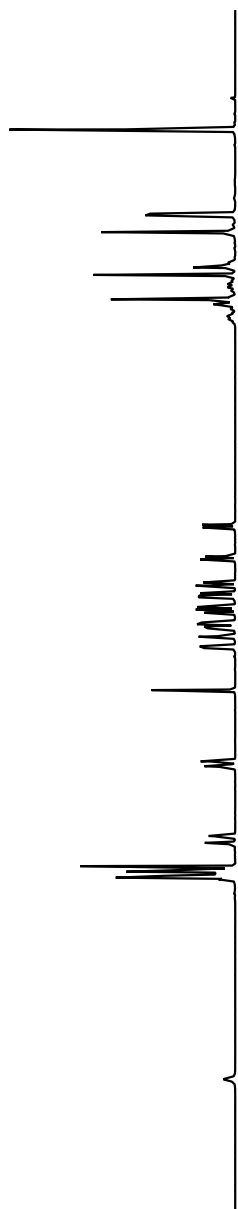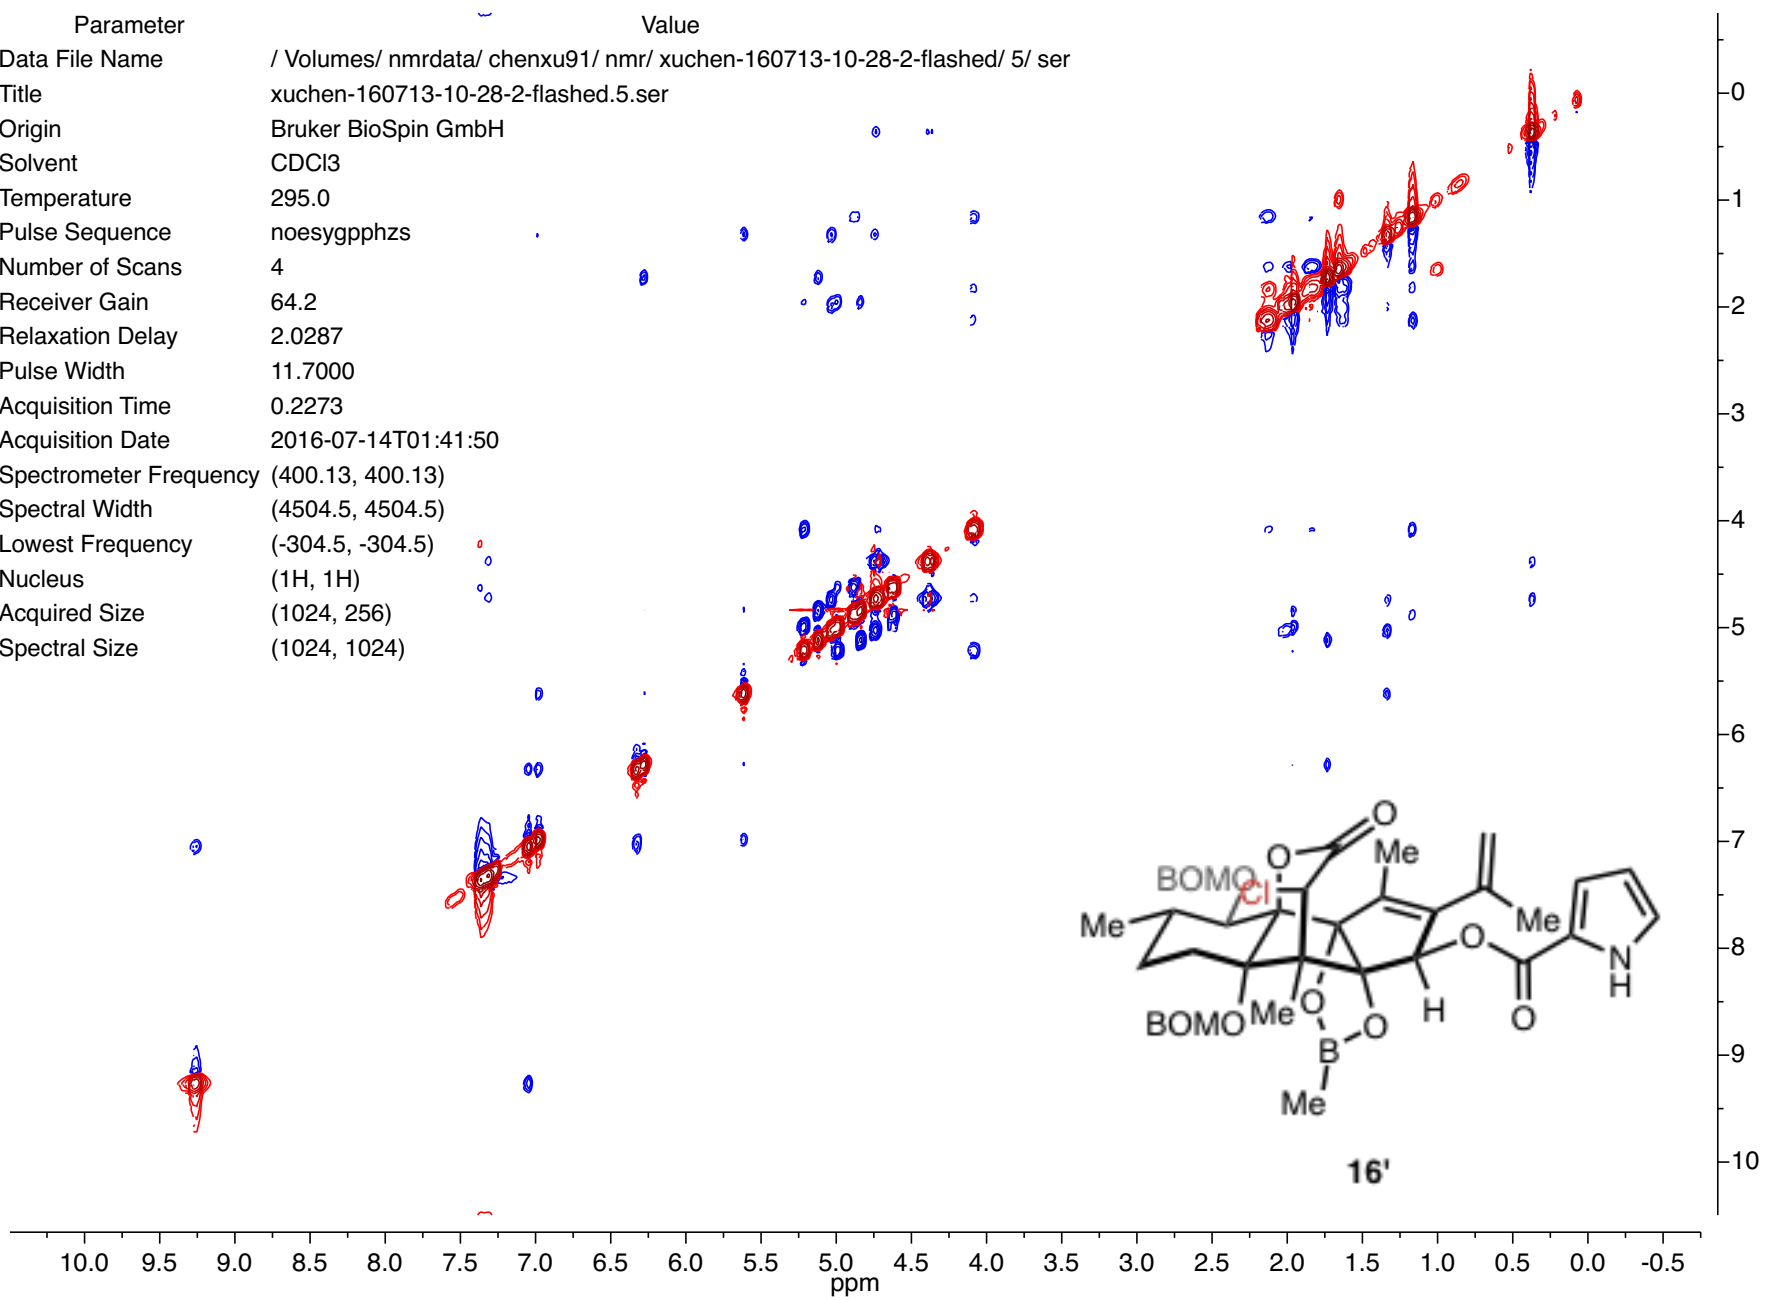

| Parameter              | Value                                                                  |
|------------------------|------------------------------------------------------------------------|
| Data File Name         | / Volumes/ nmrdata/ chenxu91/ nmr/ xuchen-160711-10-33-flashed/ 1/ fid |
| Title                  | xuchen-160711-10-33-flashed.1.fid                                      |
| Origin                 | Bruker BioSpin GmbH                                                    |
| Solvent                | CDCl3                                                                  |
| Temperature            | 294.9                                                                  |
| Pulse Sequence         | zg30                                                                   |
| Number of Scans        | 16                                                                     |
| Receiver Gain          | 112.8                                                                  |
| Relaxation Delay       | 1.0000                                                                 |
| Pulse Width            | 11.7000                                                                |
| Acquisition Time       | 4.0894                                                                 |
| Acquisition Date       | 2016-07-11T23:52:03                                                    |
| Spectrometer Frequency | 400.13                                                                 |
| Spectral Width         | 8012.8                                                                 |
| Lowest Frequency       | -1545.6                                                                |
| Nucleus                | 1H                                                                     |
| Acquired Size          | 32768                                                                  |
| Spectral Size          | 65536                                                                  |

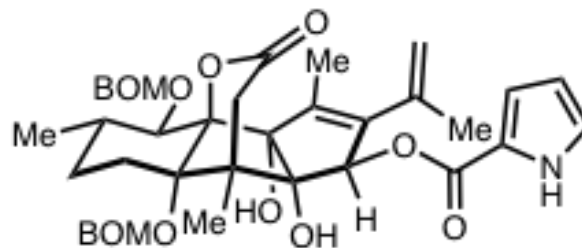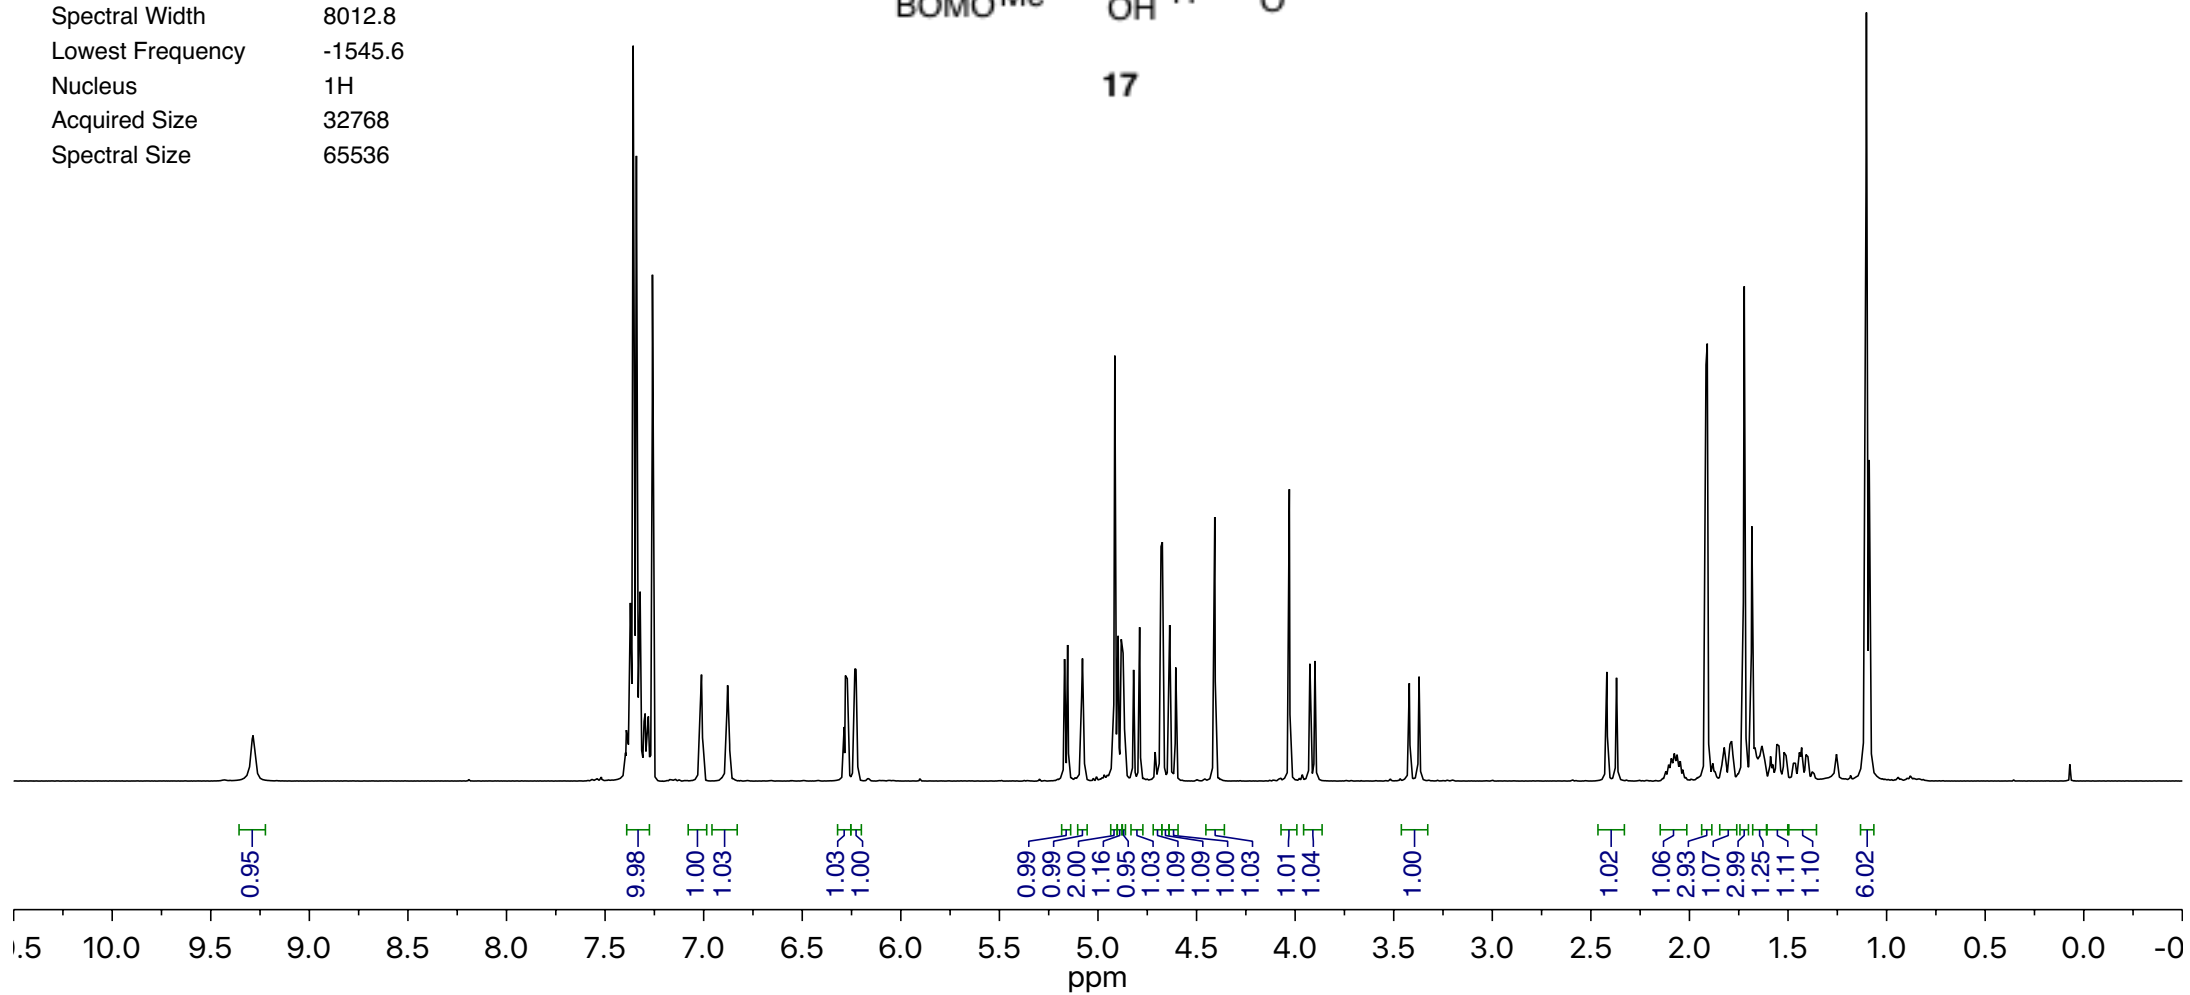

| Parameter              | Value                                                                  |
|------------------------|------------------------------------------------------------------------|
| Data File Name         | / Volumes/ nmrdata/ chenxu91/ nmr/ xuchen-160711-10-33-flashed/ 2/ fid |
| Title                  | xuchen-160711-10-33-flashed.2.fid                                      |
| Origin                 | Bruker BioSpin GmbH                                                    |
| Solvent                | CDCl <sub>3</sub>                                                      |
| Temperature            | 295.0                                                                  |
| Pulse Sequence         | zgpg30                                                                 |
| Number of Scans        | 1024                                                                   |
| Receiver Gain          | 78.7                                                                   |
| Relaxation Delay       | 2.0000                                                                 |
| Pulse Width            | 10.0000                                                                |
| Acquisition Time       | 1.3631                                                                 |
| Acquisition Date       | 2016-07-12T00:51:49                                                    |
| Spectrometer Frequency | 100.62                                                                 |
| Spectral Width         | 24038.5                                                                |
| Lowest Frequency       | -1962.8                                                                |
| Nucleus                | <sup>13</sup> C                                                        |
| Acquired Size          | 32768                                                                  |
| Spectral Size          | 65536                                                                  |

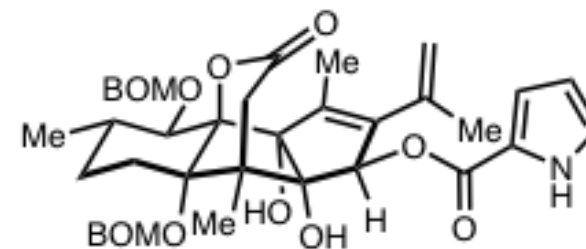

17

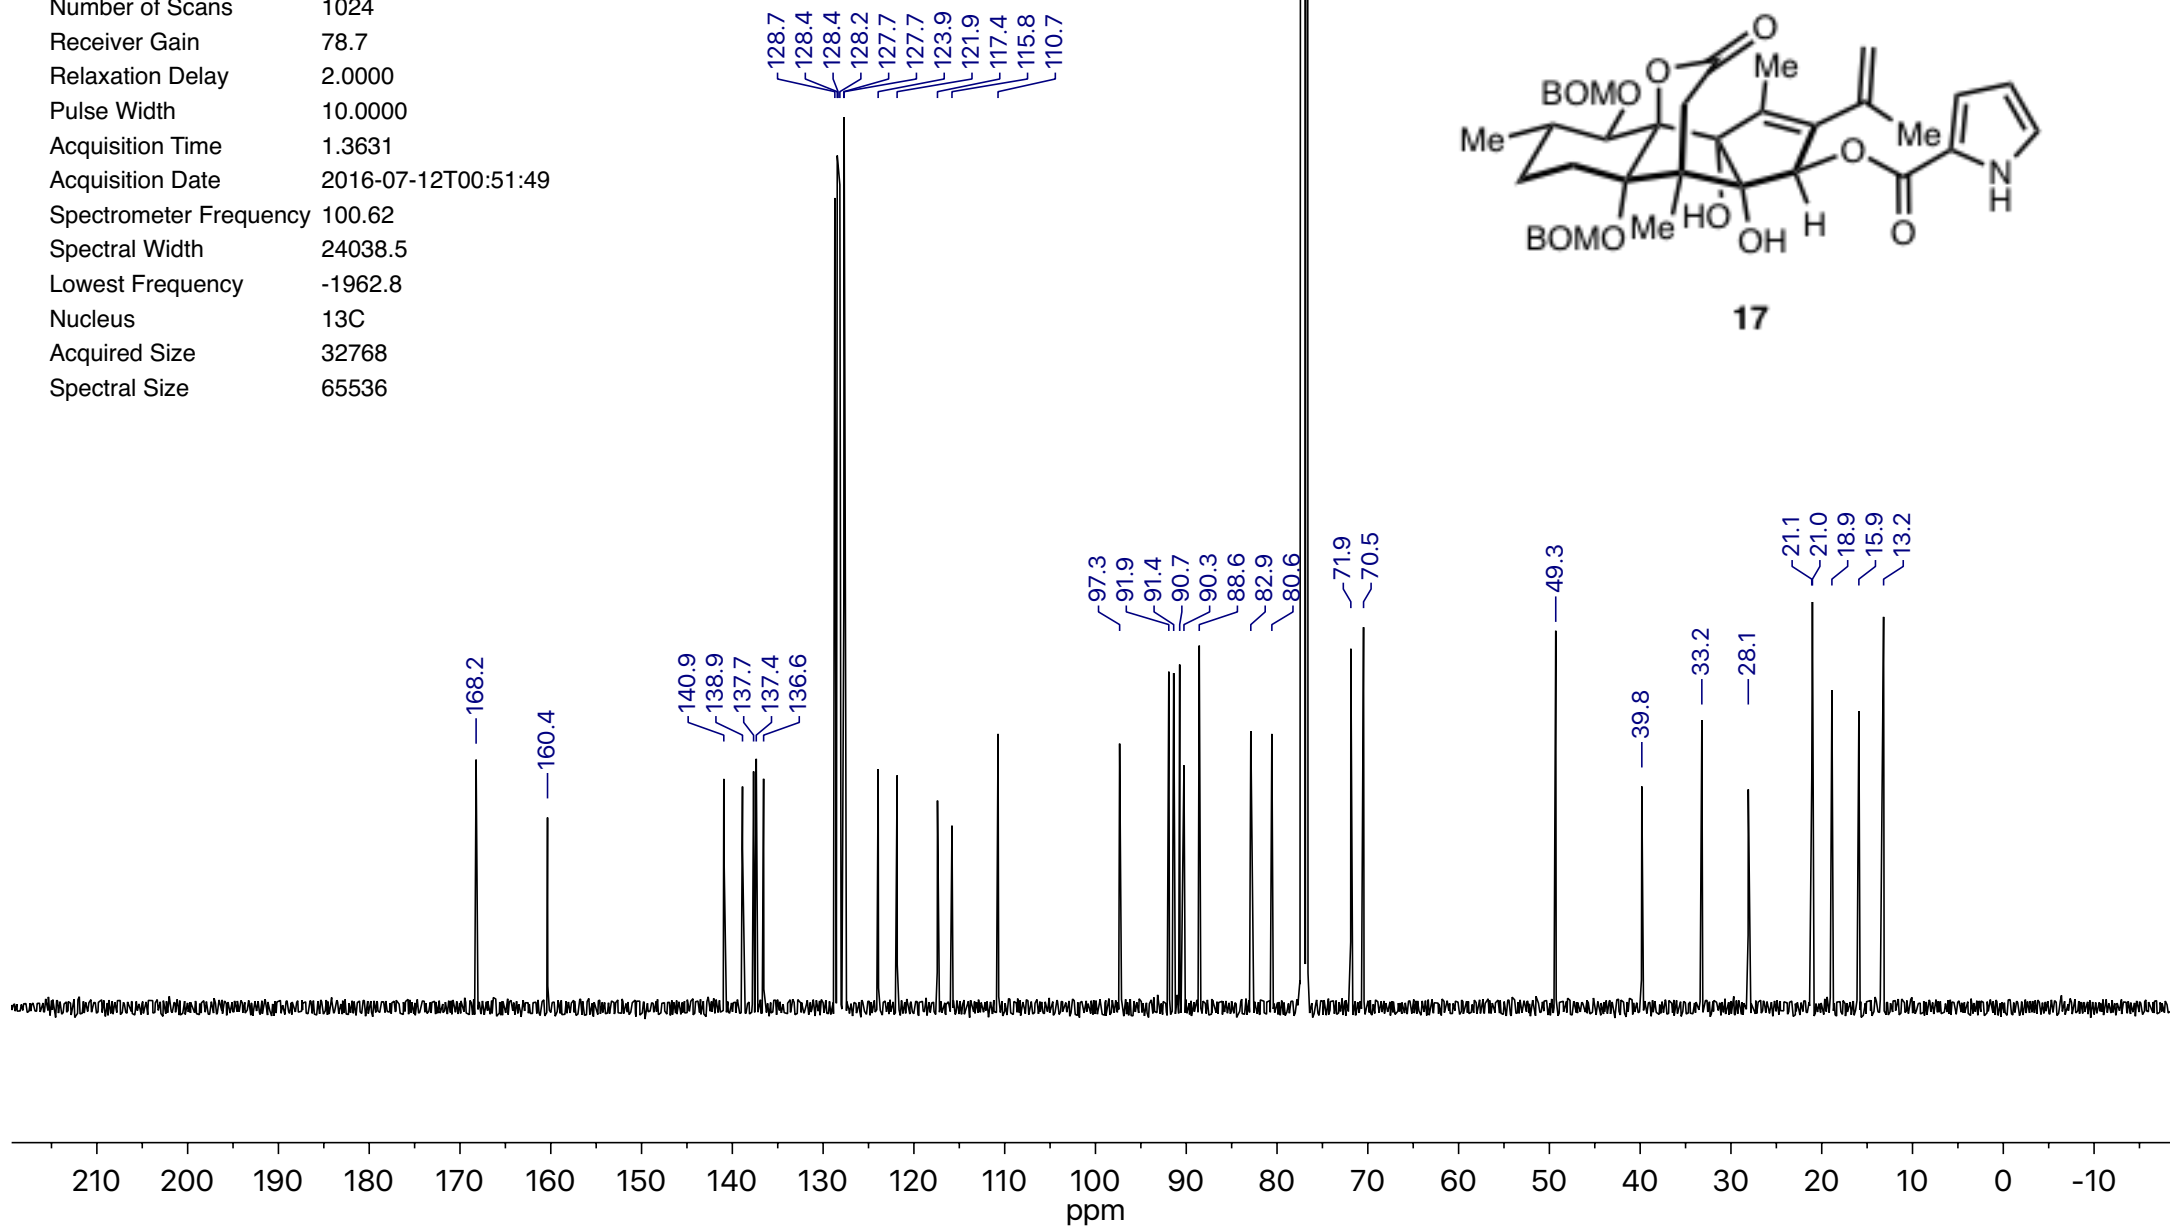

| Parameter              | Value                                                           |
|------------------------|-----------------------------------------------------------------|
| Data File Name         | /Volumes/nmrdata/chenxu91/nmr/xuchen-160713-10-36-flashed/1/fid |
| Title                  | xuchen-160713-10-36-flashed.1.fid                               |
| Origin                 | Bruker BioSpin GmbH                                             |
| Solvent                | MeOD                                                            |
| Temperature            | 294.9                                                           |
| Pulse Sequence         | zg30                                                            |
| Number of Scans        | 16                                                              |
| Receiver Gain          | 142.8                                                           |
| Relaxation Delay       | 1.0000                                                          |
| Pulse Width            | 11.7000                                                         |
| Acquisition Time       | 4.0894                                                          |
| Acquisition Date       | 2016-07-13T22:47:22                                             |
| Spectrometer Frequency | 400.13                                                          |
| Spectral Width         | 8012.8                                                          |
| Lowest Frequency       | -1543.6                                                         |
| Nucleus                | <sup>1</sup> H                                                  |
| Acquired Size          | 32768                                                           |
| Spectral Size          | 65536                                                           |

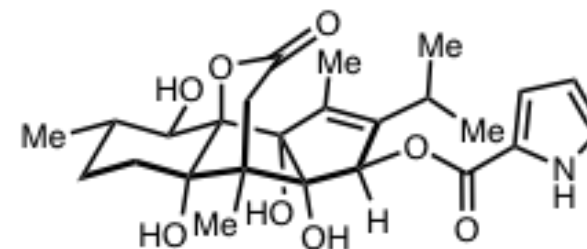

**anhydroryanodine (18)**

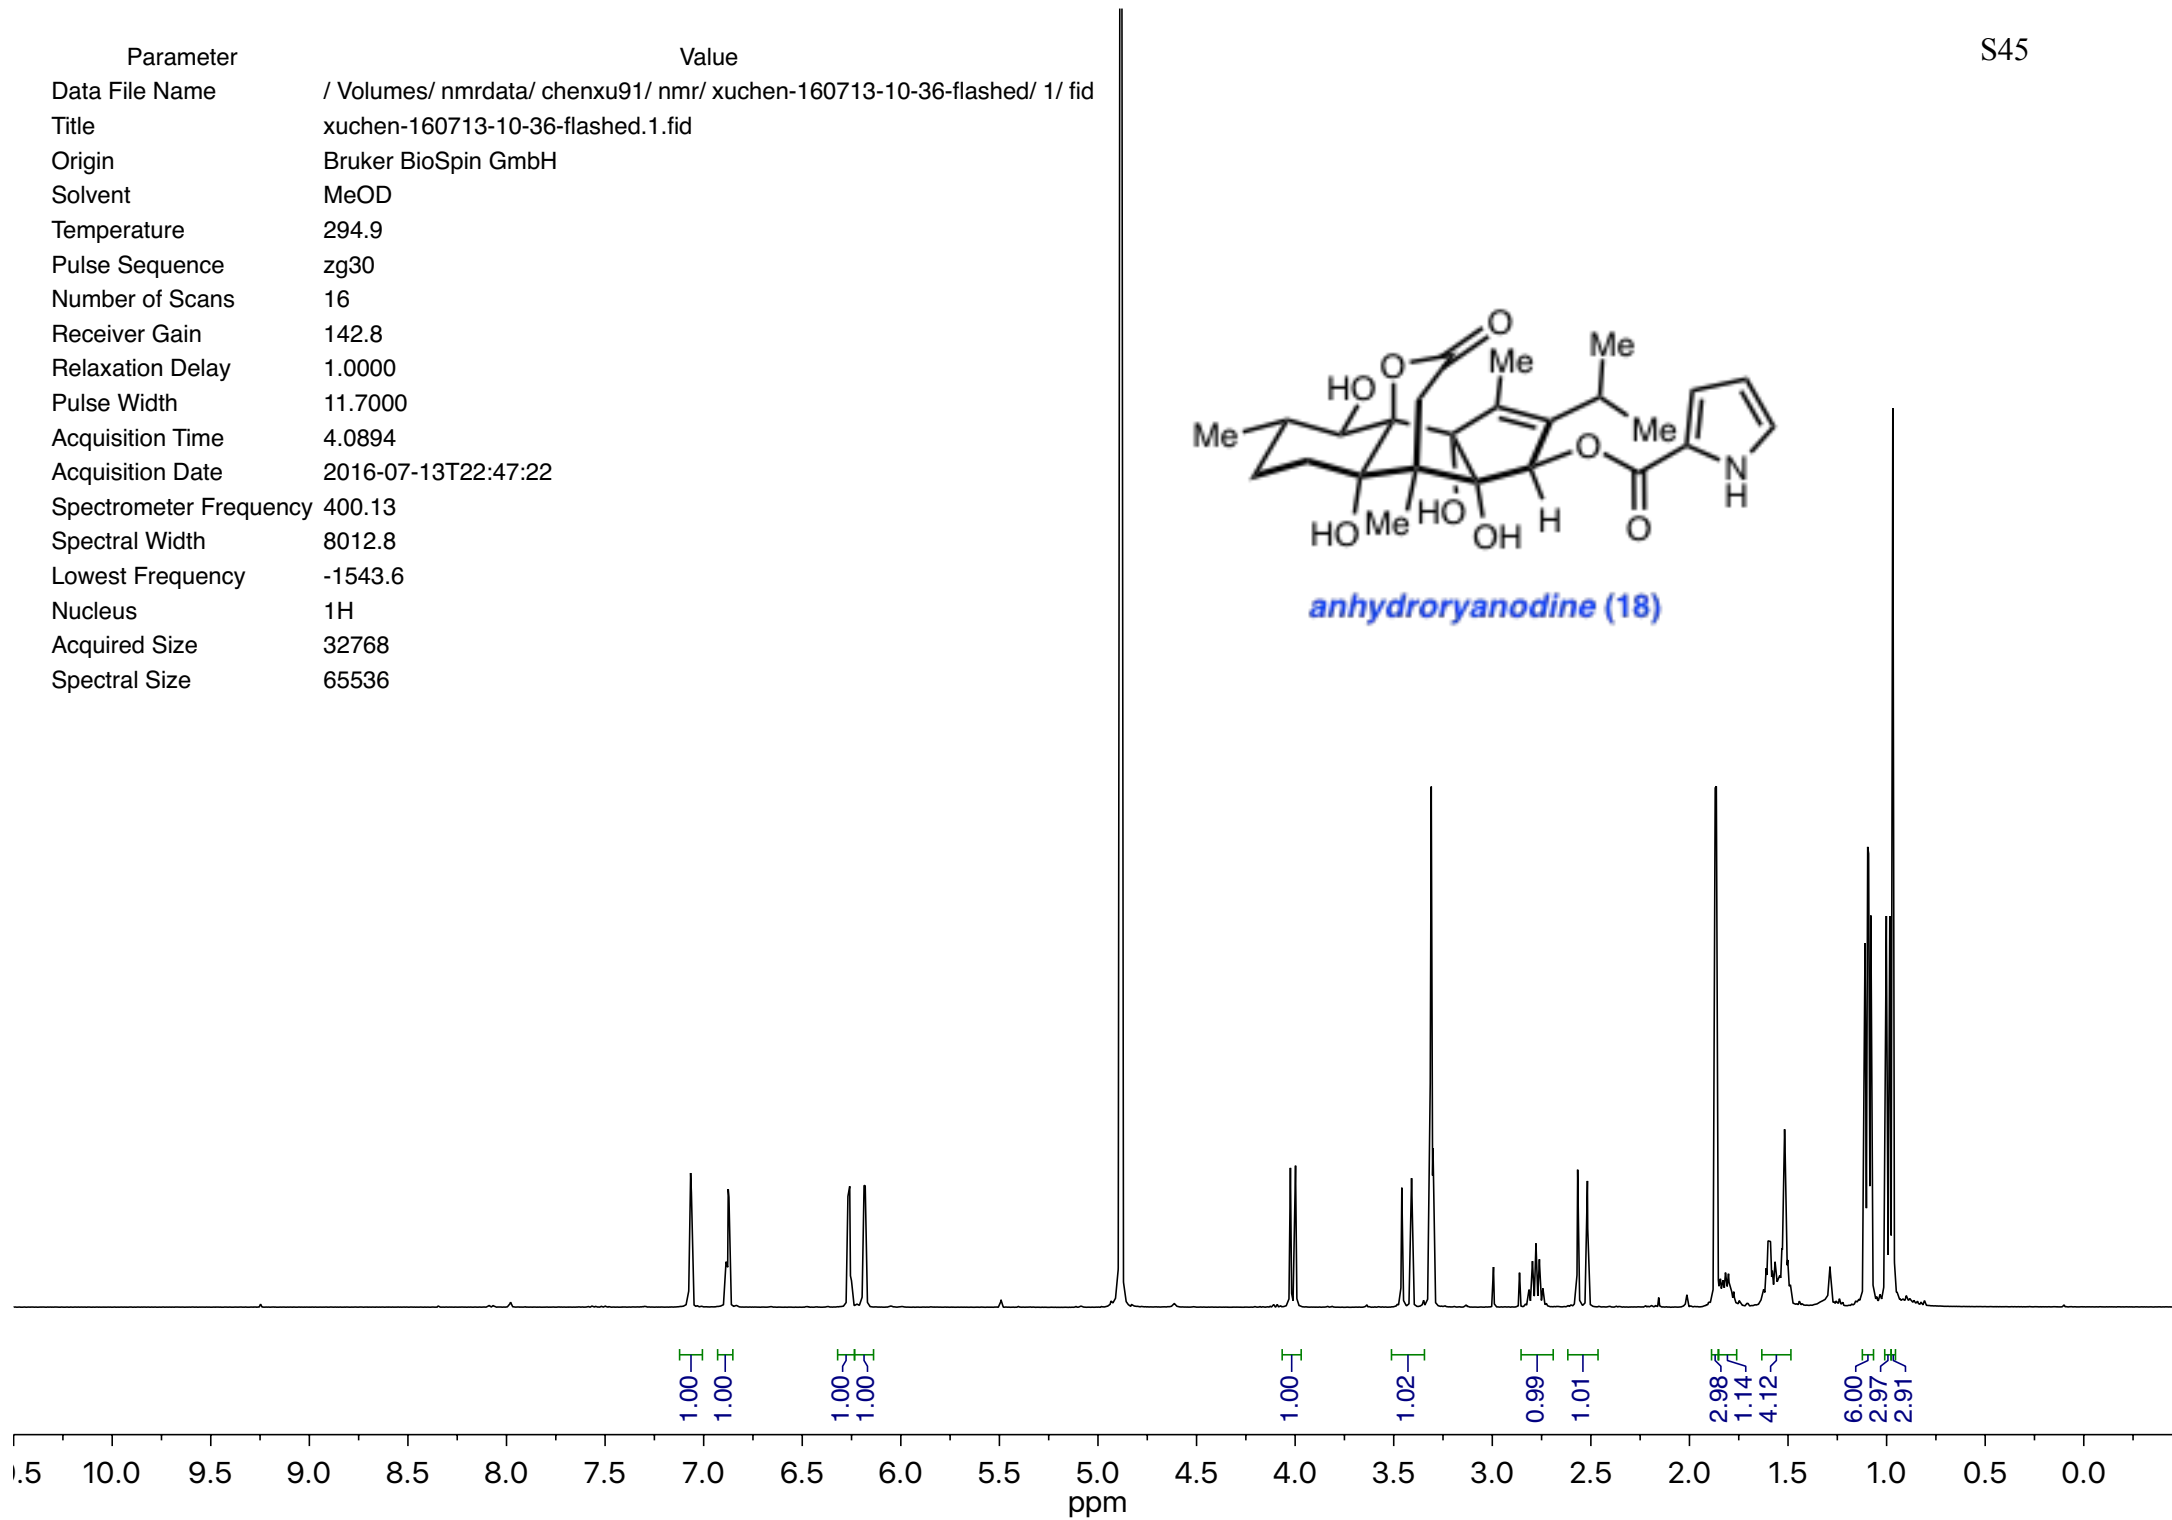

| Parameter              | Value                                                             |
|------------------------|-------------------------------------------------------------------|
| Data File Name         | /Volumes/nmrdata/chenxu91/nmr/xuchen-160713-10-36-flashed/ 2/ fid |
| Title                  | xuchen-160713-10-36-flashed.2.fid                                 |
| Origin                 | Bruker BioSpin GmbH                                               |
| Solvent                | MeOD                                                              |
| Temperature            | 294.9                                                             |
| Pulse Sequence         | zgpg30                                                            |
| Number of Scans        | 700                                                               |
| Receiver Gain          | 78.7                                                              |
| Relaxation Delay       | 2.0000                                                            |
| Pulse Width            | 10.0000                                                           |
| Acquisition Time       | 1.3631                                                            |
| Acquisition Date       | 2016-07-13T23:28:32                                               |
| Spectrometer Frequency | 100.62                                                            |
| Spectral Width         | 24038.5                                                           |
| Lowest Frequency       | -1817.4                                                           |
| Nucleus                | <sup>13</sup> C                                                   |
| Acquired Size          | 32768                                                             |
| Spectral Size          | 65536                                                             |

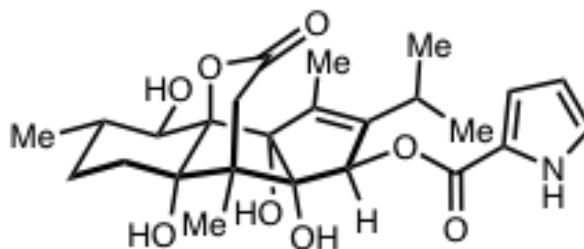

**anhydroryanodine (18)**

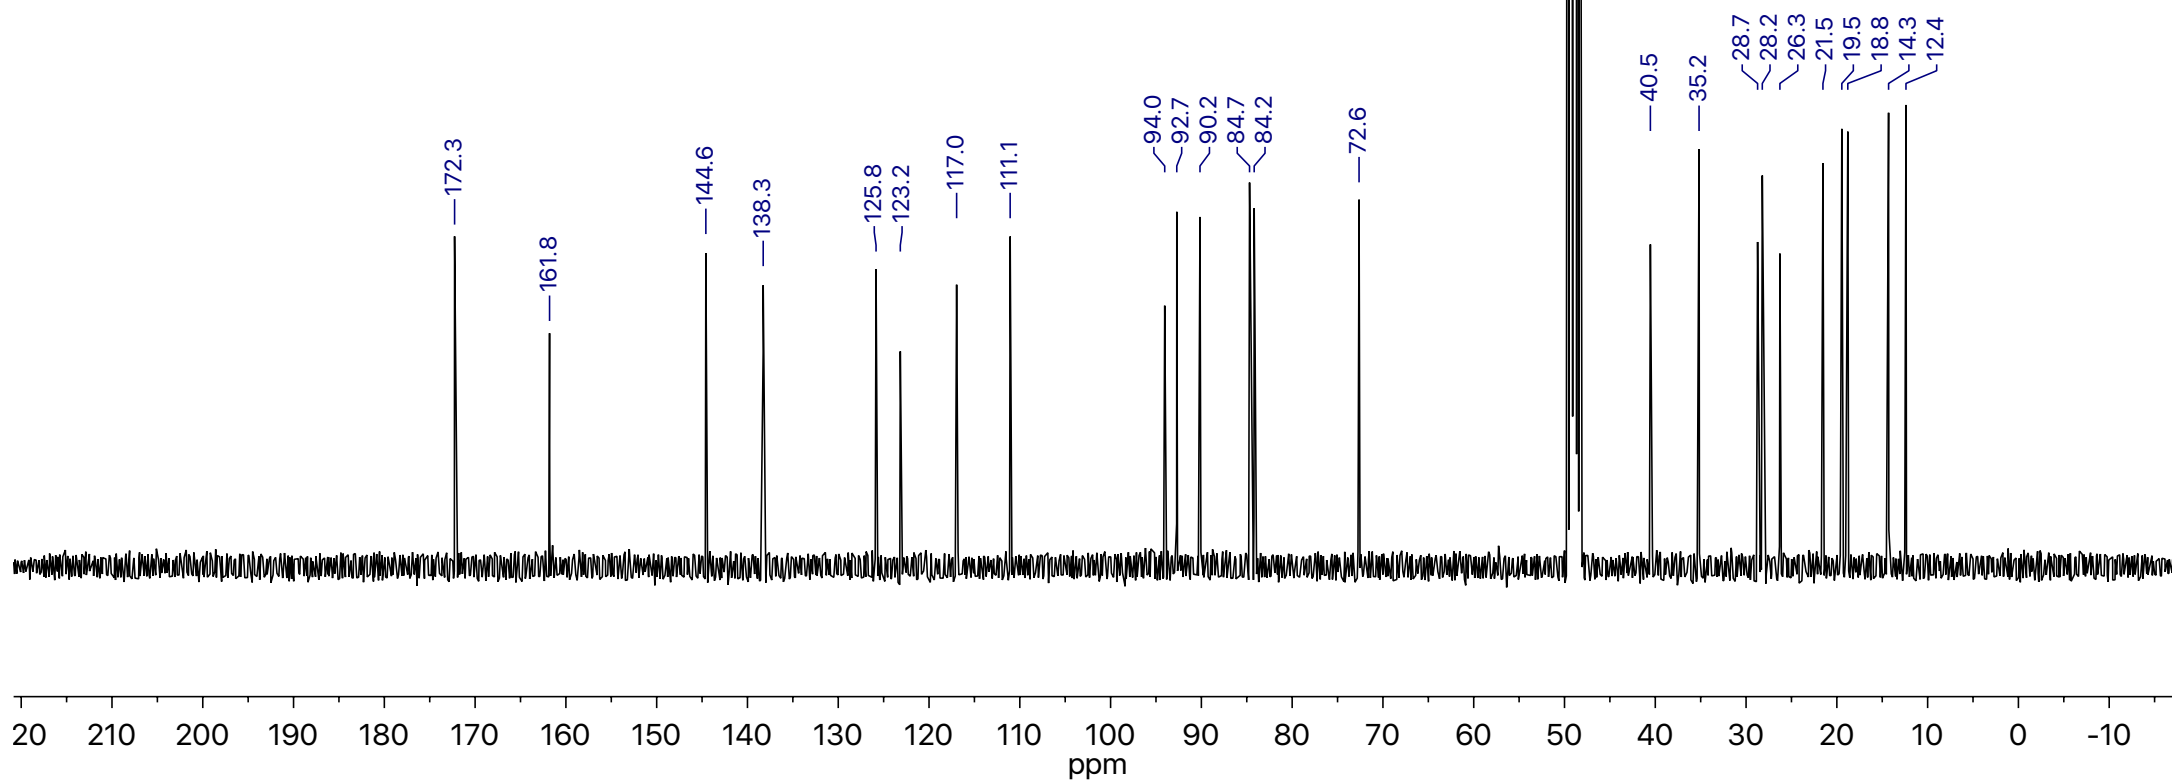

| Parameter              | Value                                                                |
|------------------------|----------------------------------------------------------------------|
| Data File Name         | / Volumes/ nmrdata/ chenxu91/ nmr/ xuchen-160716-10-40-crude/ 1/ fid |
| Title                  | xuchen-160716-10-40-crude.1.fid                                      |
| Origin                 | Bruker BioSpin GmbH                                                  |
| Solvent                | CDCl3                                                                |
| Temperature            | 294.9                                                                |
| Pulse Sequence         | zg30                                                                 |
| Number of Scans        | 16                                                                   |
| Receiver Gain          | 197.4                                                                |
| Relaxation Delay       | 1.0000                                                               |
| Pulse Width            | 11.7000                                                              |
| Acquisition Time       | 4.0894                                                               |
| Acquisition Date       | 2016-07-16T12:47:31                                                  |
| Spectrometer Frequency | 400.13                                                               |
| Spectral Width         | 8012.8                                                               |
| Lowest Frequency       | -1545.6                                                              |
| Nucleus                | 1H                                                                   |
| Acquired Size          | 32768                                                                |
| Spectral Size          | 65536                                                                |

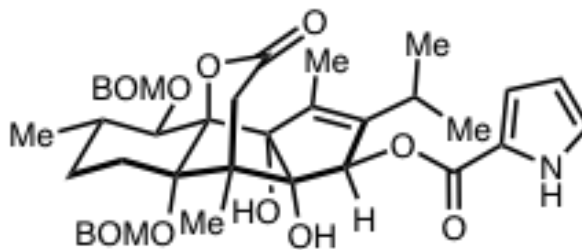

19

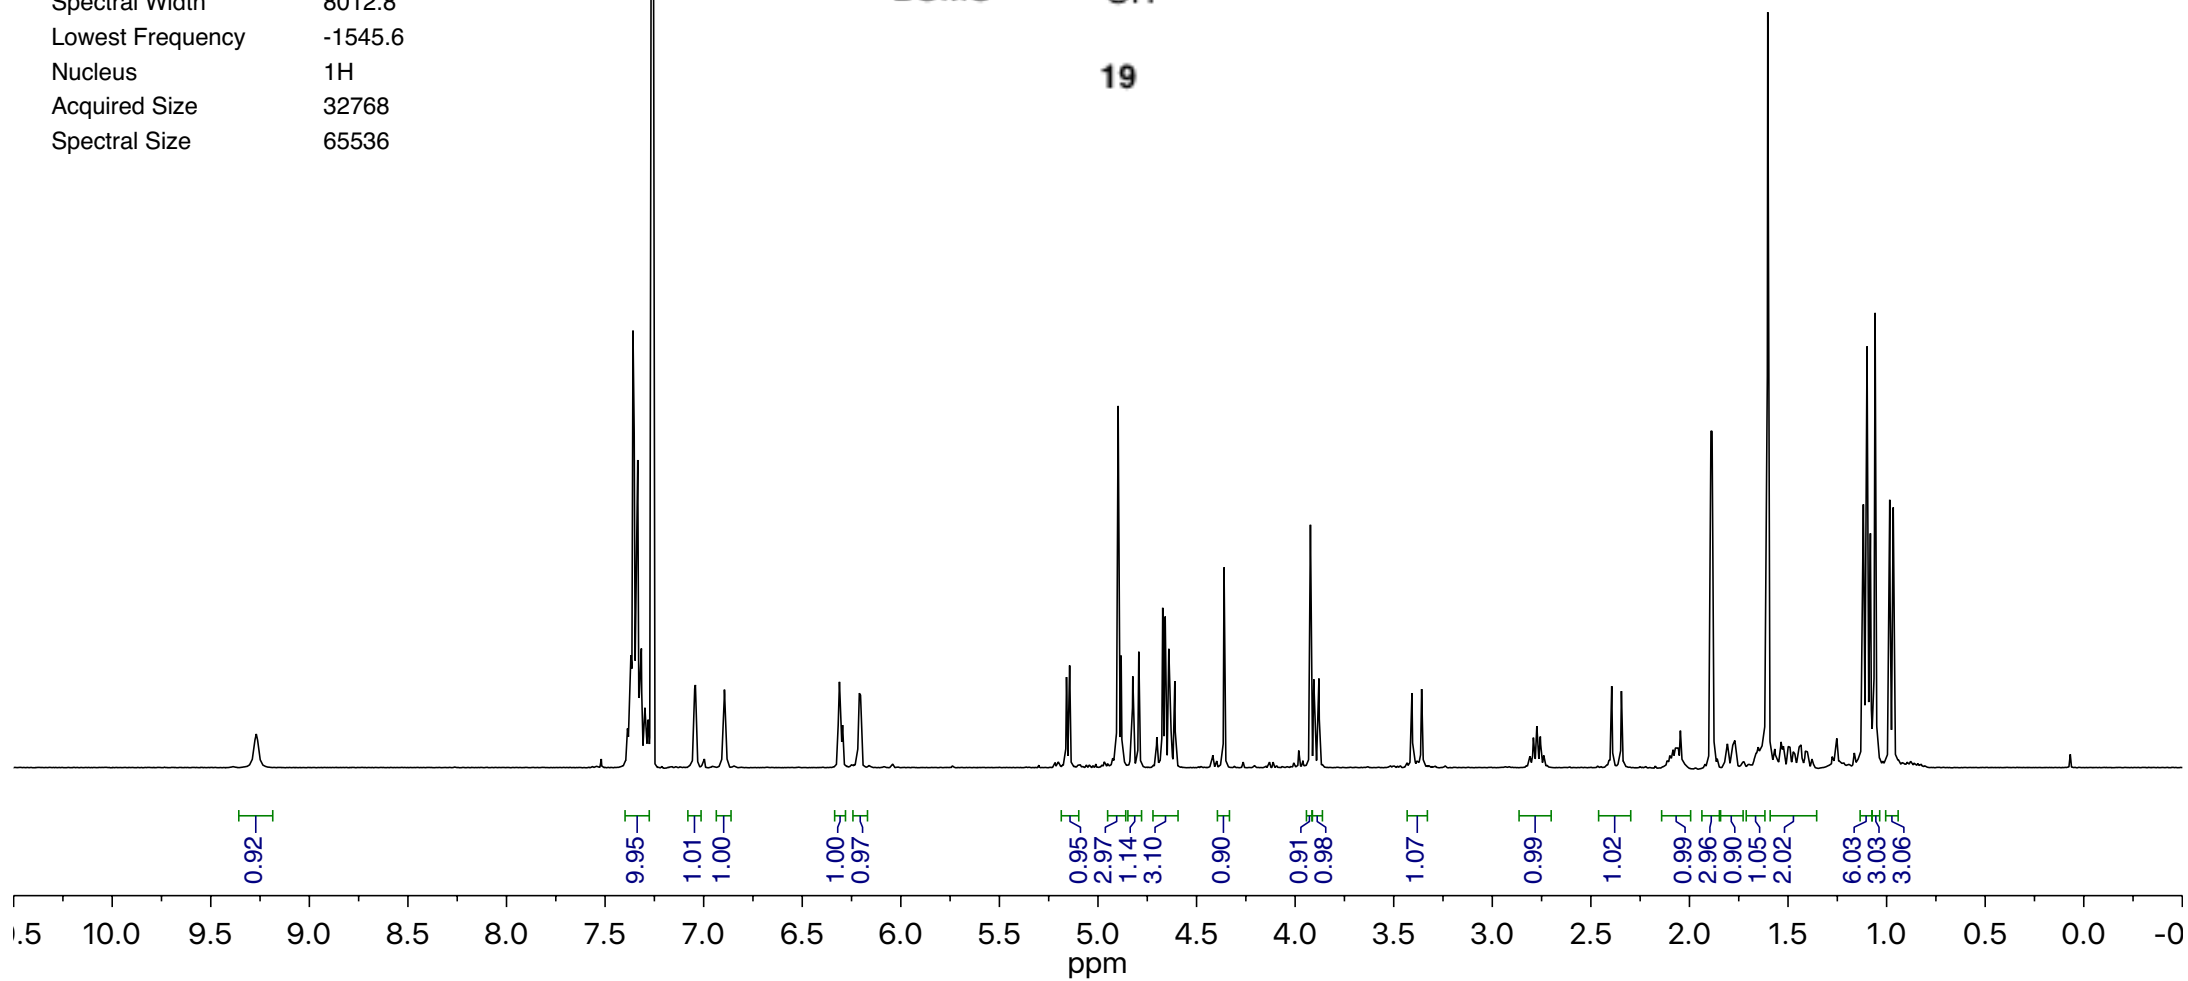

| Parameter              | Value                                                                |
|------------------------|----------------------------------------------------------------------|
| Data File Name         | / Volumes/ nmrdata/ chenxu91/ nmr/ xuchen-160716-10-40-crude/ 3/ fid |
| Title                  | xuchen-160716-10-40-crude.3.fid                                      |
| Origin                 | Bruker BioSpin GmbH                                                  |
| Solvent                | CDCl <sub>3</sub>                                                    |
| Temperature            | 294.9                                                                |
| Pulse Sequence         | zgpg30                                                               |
| Number of Scans        | 700                                                                  |
| Receiver Gain          | 78.7                                                                 |
| Relaxation Delay       | 2.0000                                                               |
| Pulse Width            | 10.0000                                                              |
| Acquisition Time       | 1.3631                                                               |
| Acquisition Date       | 2016-07-16T13:37:23                                                  |
| Spectrometer Frequency | 100.62                                                               |
| Spectral Width         | 24038.5                                                              |
| Lowest Frequency       | -1961.6                                                              |
| Nucleus                | <sup>13</sup> C                                                      |
| Acquired Size          | 32768                                                                |
| Spectral Size          | 65536                                                                |

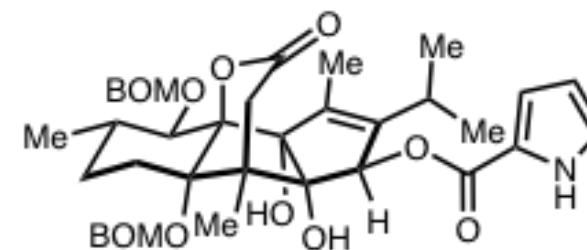

19

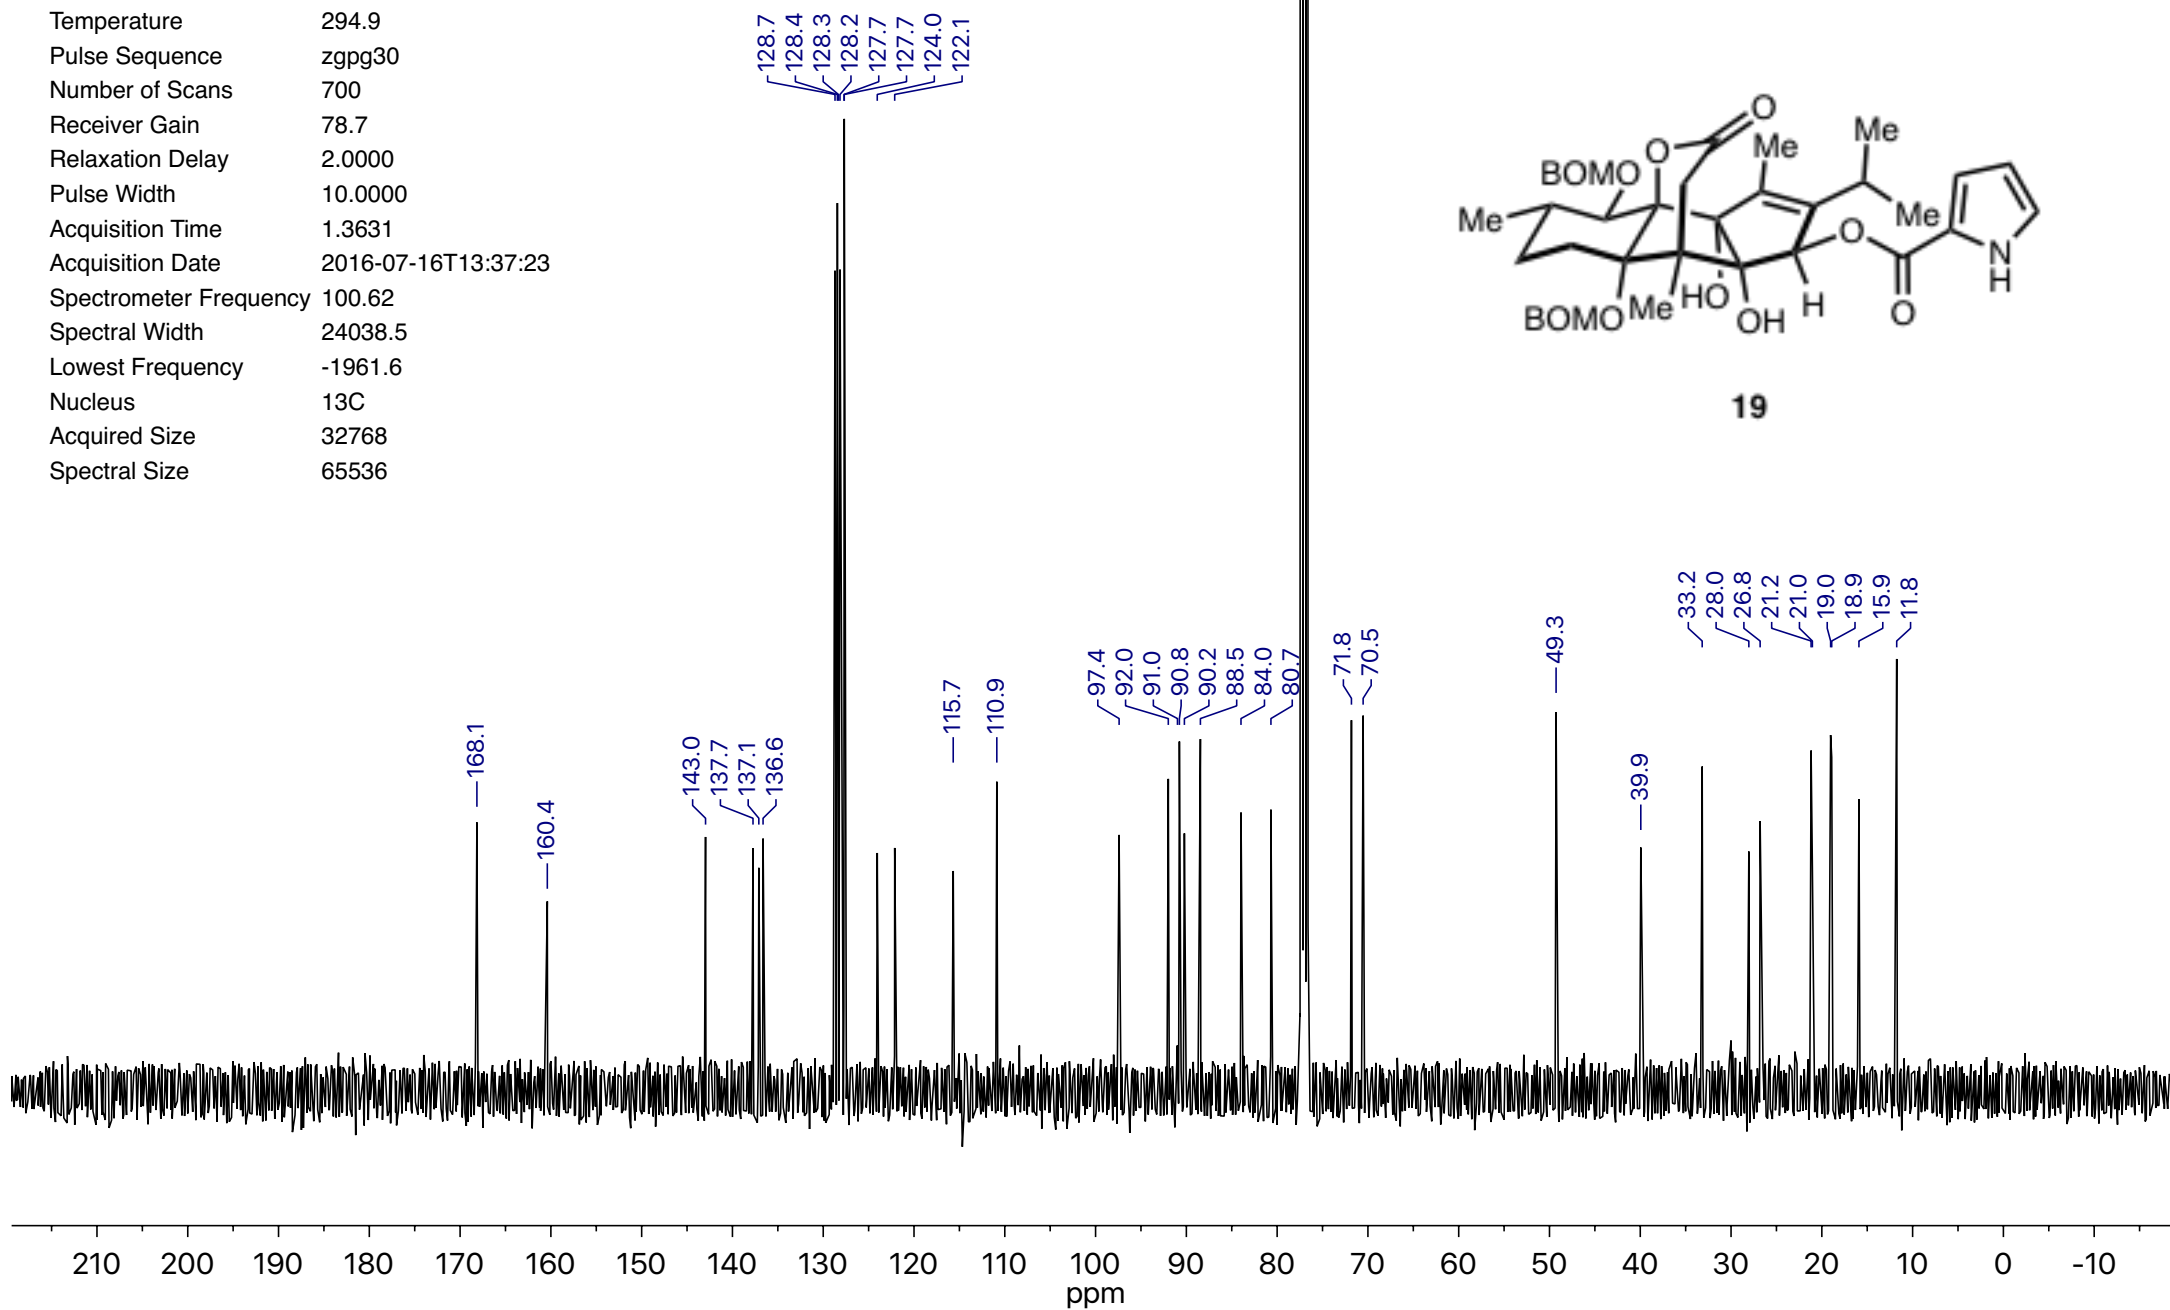



| Parameter              | Value                                                                           |
|------------------------|---------------------------------------------------------------------------------|
| Data File Name         | /Volumes/nmrdata-1/chenxu91/vnmrsys/data/xuchen-160717-10-42-1/PROTON01.fid/fid |
| Title                  | PROTON01                                                                        |
| Origin                 | Varian                                                                          |
| Solvent                | CDCl3                                                                           |
| Temperature            | 25.0                                                                            |
| Pulse Sequence         | s2pul                                                                           |
| Number of Scans        | 8                                                                               |
| Receiver Gain          | 32                                                                              |
| Relaxation Delay       | 1.0000                                                                          |
| Pulse Width            | 5.9000                                                                          |
| Acquisition Time       | 3.0000                                                                          |
| Acquisition Date       | 2016-07-17T22:13:50                                                             |
| Spectrometer Frequency | 499.66                                                                          |
| Spectral Width         | 8000.0                                                                          |
| Lowest Frequency       | -1013.6                                                                         |
| Nucleus                | 1H                                                                              |
| Acquired Size          | 24000                                                                           |
| Spectral Size          | 65536                                                                           |

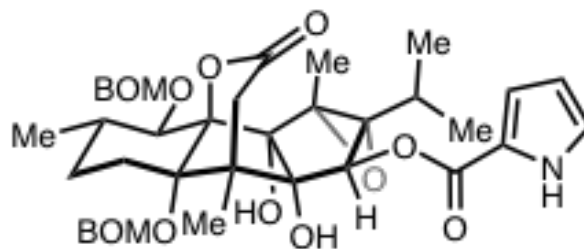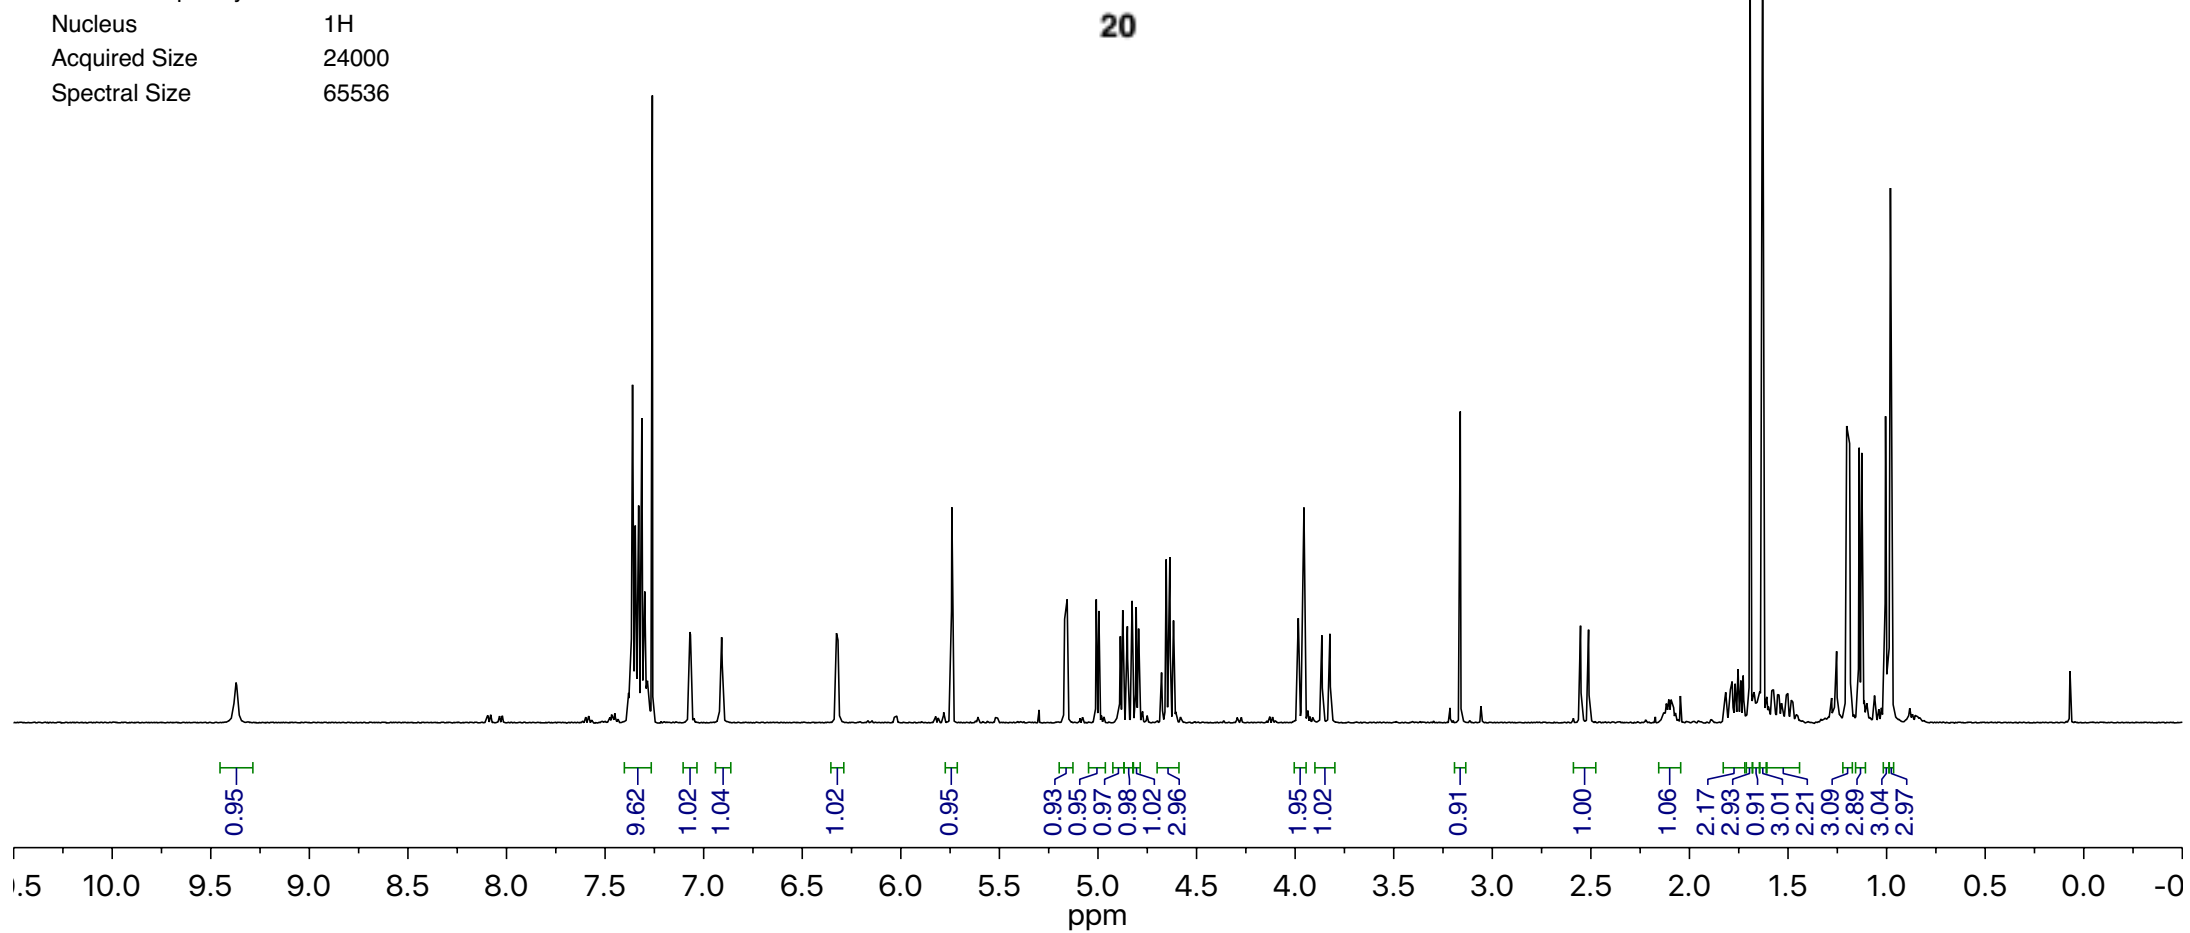

| Parameter              | Value                                                                           |
|------------------------|---------------------------------------------------------------------------------|
| Data File Name         | /Volumes/nmrdata-1/chenxu91/vnmrsys/data/xuchen-160717-10-42-1/CARBON02.fid/fid |
| Title                  | CARBON02                                                                        |
| Origin                 | Varian                                                                          |
| Solvent                | CDCl3                                                                           |
| Temperature            | 25.0                                                                            |
| Pulse Sequence         | s2pul                                                                           |
| Number of Scans        | 3000                                                                            |
| Receiver Gain          | 30                                                                              |
| Relaxation Delay       | 1.0000                                                                          |
| Pulse Width            | 4.5000                                                                          |
| Acquisition Time       | 1.0420                                                                          |
| Acquisition Date       | 2016-07-18T00:45:43                                                             |
| Spectrometer Frequency | 125.65                                                                          |
| Spectral Width         | 31446.5                                                                         |
| Lowest Frequency       | -1906.8                                                                         |
| Nucleus                | <sup>13</sup> C                                                                 |
| Acquired Size          | 32768                                                                           |
| Spectral Size          | 65536                                                                           |

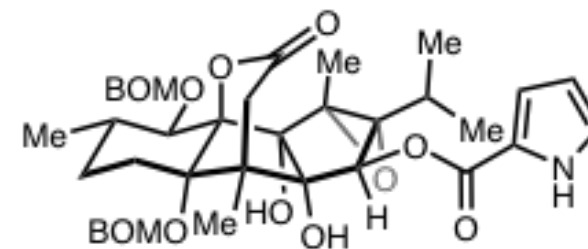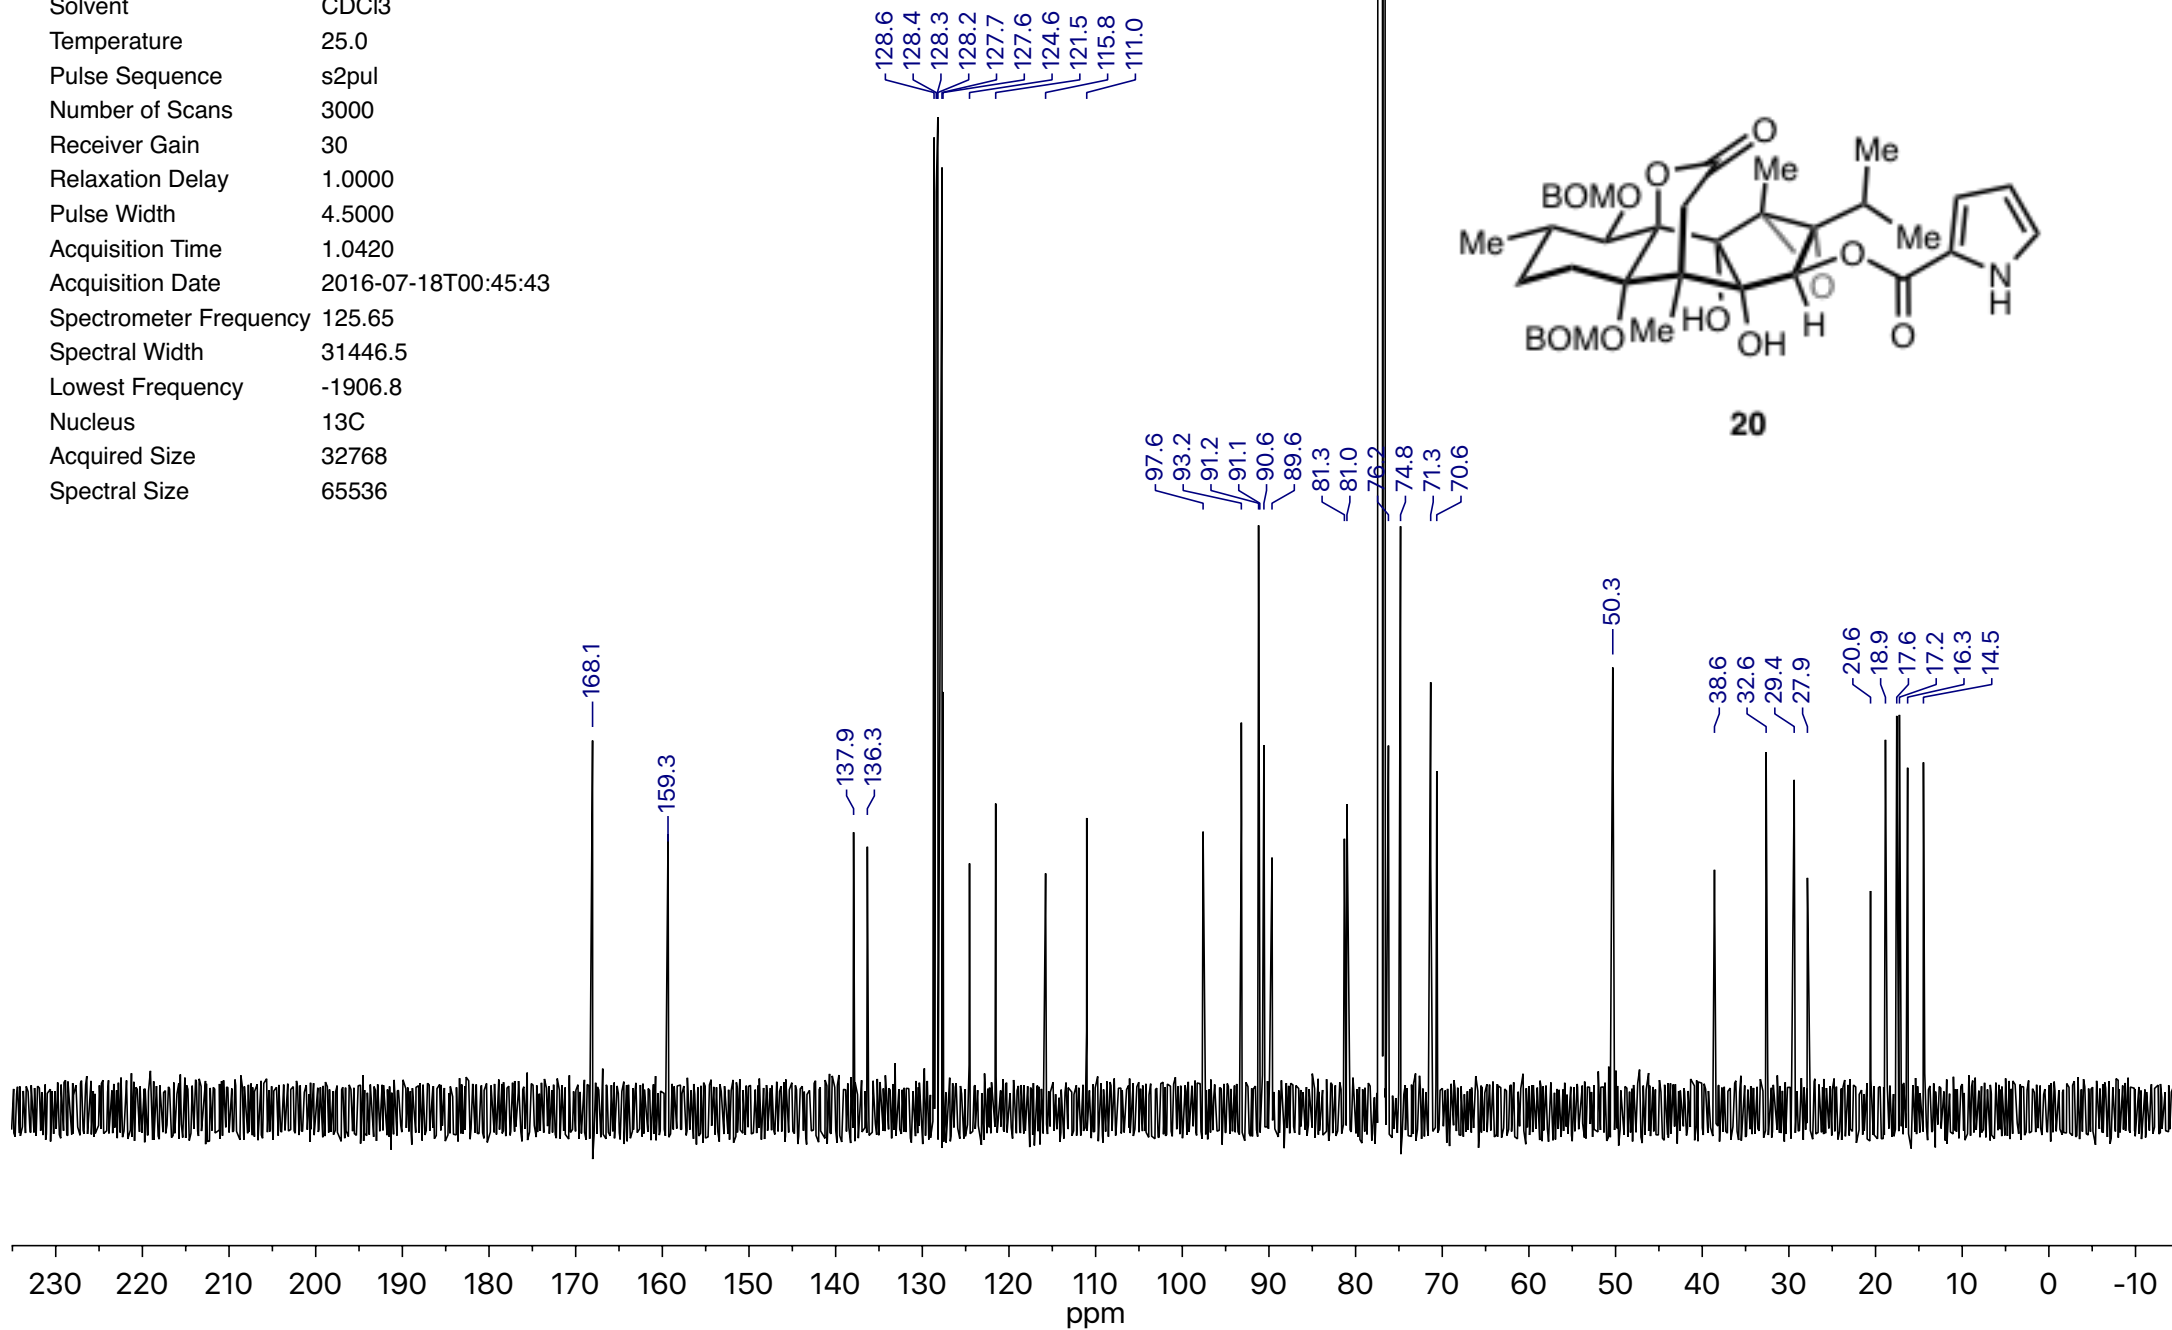

| Parameter              | Value                                                                  |
|------------------------|------------------------------------------------------------------------|
| Data File Name         | / Volumes/ nmrdata/ chenxu91/ nmr/ xuchen-160813-10-75-preptlc/ 1/ fid |
| Title                  | xuchen-160813-10-75-preptlc.1.fid                                      |
| Origin                 | Bruker BioSpin GmbH                                                    |
| Solvent                | MeOD                                                                   |
| Temperature            | 294.9                                                                  |
| Pulse Sequence         | zg30                                                                   |
| Number of Scans        | 16                                                                     |
| Receiver Gain          | 156.2                                                                  |
| Relaxation Delay       | 1.0000                                                                 |
| Pulse Width            | 11.7000                                                                |
| Acquisition Time       | 4.0894                                                                 |
| Acquisition Date       | 2016-08-13T20:46:42                                                    |
| Spectrometer Frequency | 400.13                                                                 |
| Spectral Width         | 8012.8                                                                 |
| Lowest Frequency       | -1543.6                                                                |
| Nucleus                | <sup>1</sup> H                                                         |
| Acquired Size          | 32768                                                                  |
| Spectral Size          | 65536                                                                  |

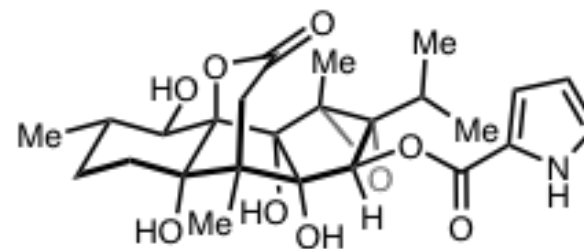

21

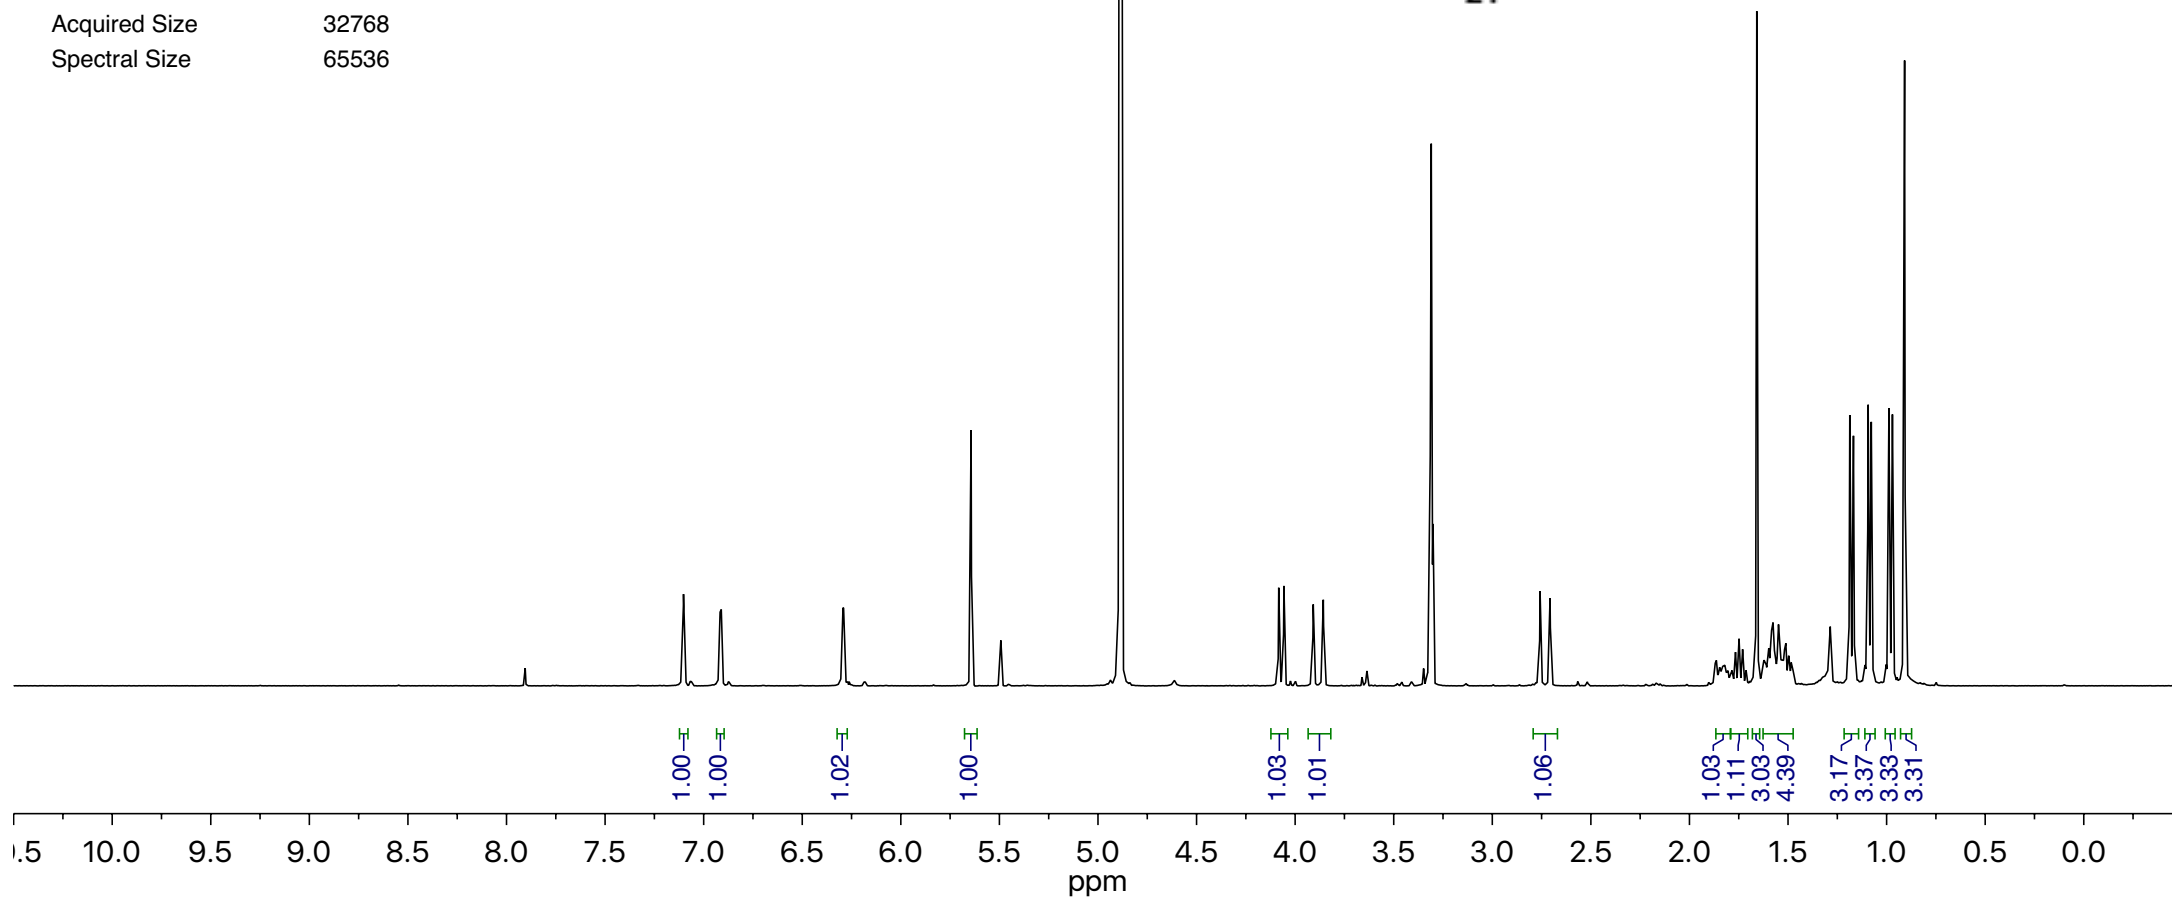

| Parameter              | Value                                                           |
|------------------------|-----------------------------------------------------------------|
| Data File Name         | /Volumes/nmrdata/chenxu91/nmr/xuchen-160813-10-75-preptlc/3/fid |
| Title                  | xuchen-160813-10-75-preptlc.3.fid                               |
| Origin                 | Bruker BioSpin GmbH                                             |
| Solvent                | MeOD                                                            |
| Temperature            | 295.0                                                           |
| Pulse Sequence         | zgpg30                                                          |
| Number of Scans        | 1024                                                            |
| Receiver Gain          | 72.0                                                            |
| Relaxation Delay       | 2.0000                                                          |
| Pulse Width            | 10.0000                                                         |
| Acquisition Time       | 1.3631                                                          |
| Acquisition Date       | 2016-08-14T00:07:31                                             |
| Spectrometer Frequency | 100.62                                                          |
| Spectral Width         | 24038.5                                                         |
| Lowest Frequency       | -1817.1                                                         |
| Nucleus                | <sup>13</sup> C                                                 |
| Acquired Size          | 32768                                                           |
| Spectral Size          | 65536                                                           |

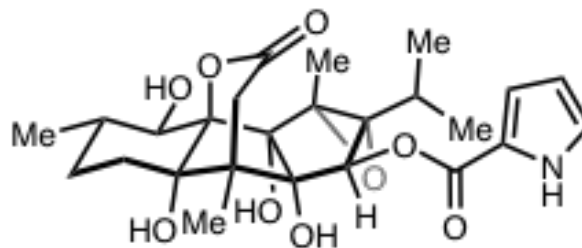

21

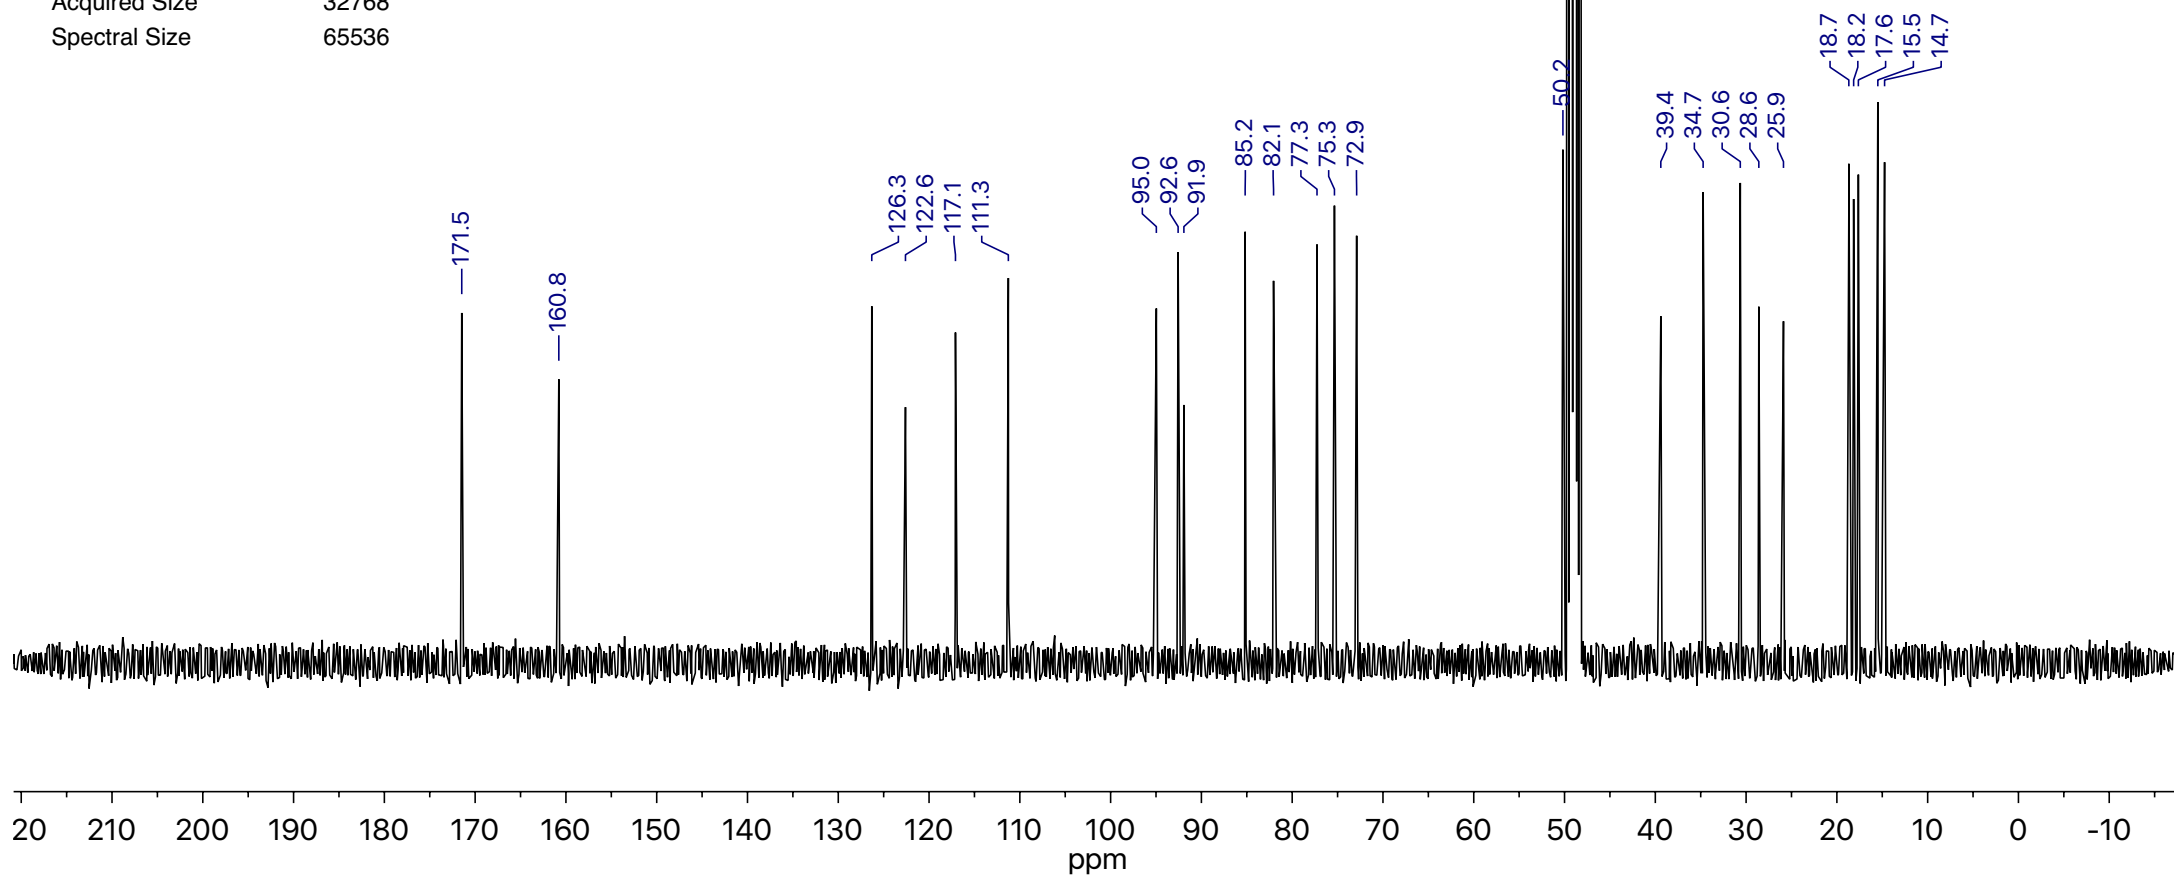

| Parameter              | Value                                                                                        |
|------------------------|----------------------------------------------------------------------------------------------|
| Data File Name         | / Volumes/ nmrdata/ chenxu91/ vnmrsys/ data/ xuchen-160805-10-67-flashed/ PROTON_01.fid/ fid |
| Title                  | PROTON_01                                                                                    |
| Origin                 | Varian                                                                                       |
| Solvent                | MeOD                                                                                         |
| Temperature            | 25.0                                                                                         |
| Pulse Sequence         | s2pul                                                                                        |
| Number of Scans        | 8                                                                                            |
| Receiver Gain          | 58                                                                                           |
| Relaxation Delay       | 1.0000                                                                                       |
| Pulse Width            | 3.2000                                                                                       |
| Acquisition Time       | 1.7046                                                                                       |
| Acquisition Date       | 2016-08-05T20:22:35                                                                          |
| Spectrometer Frequency | 599.62                                                                                       |
| Spectral Width         | 9611.9                                                                                       |
| Lowest Frequency       | -1207.1                                                                                      |
| Nucleus                | <sup>1</sup> H                                                                               |
| Acquired Size          | 16384                                                                                        |
| Spectral Size          | 65536                                                                                        |

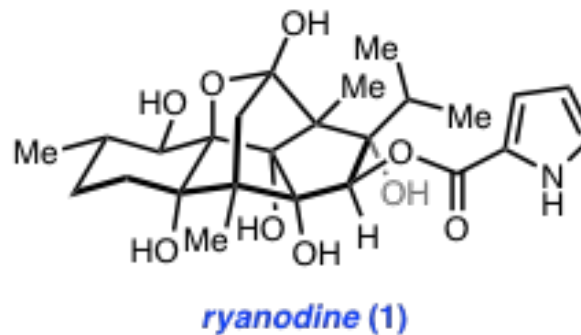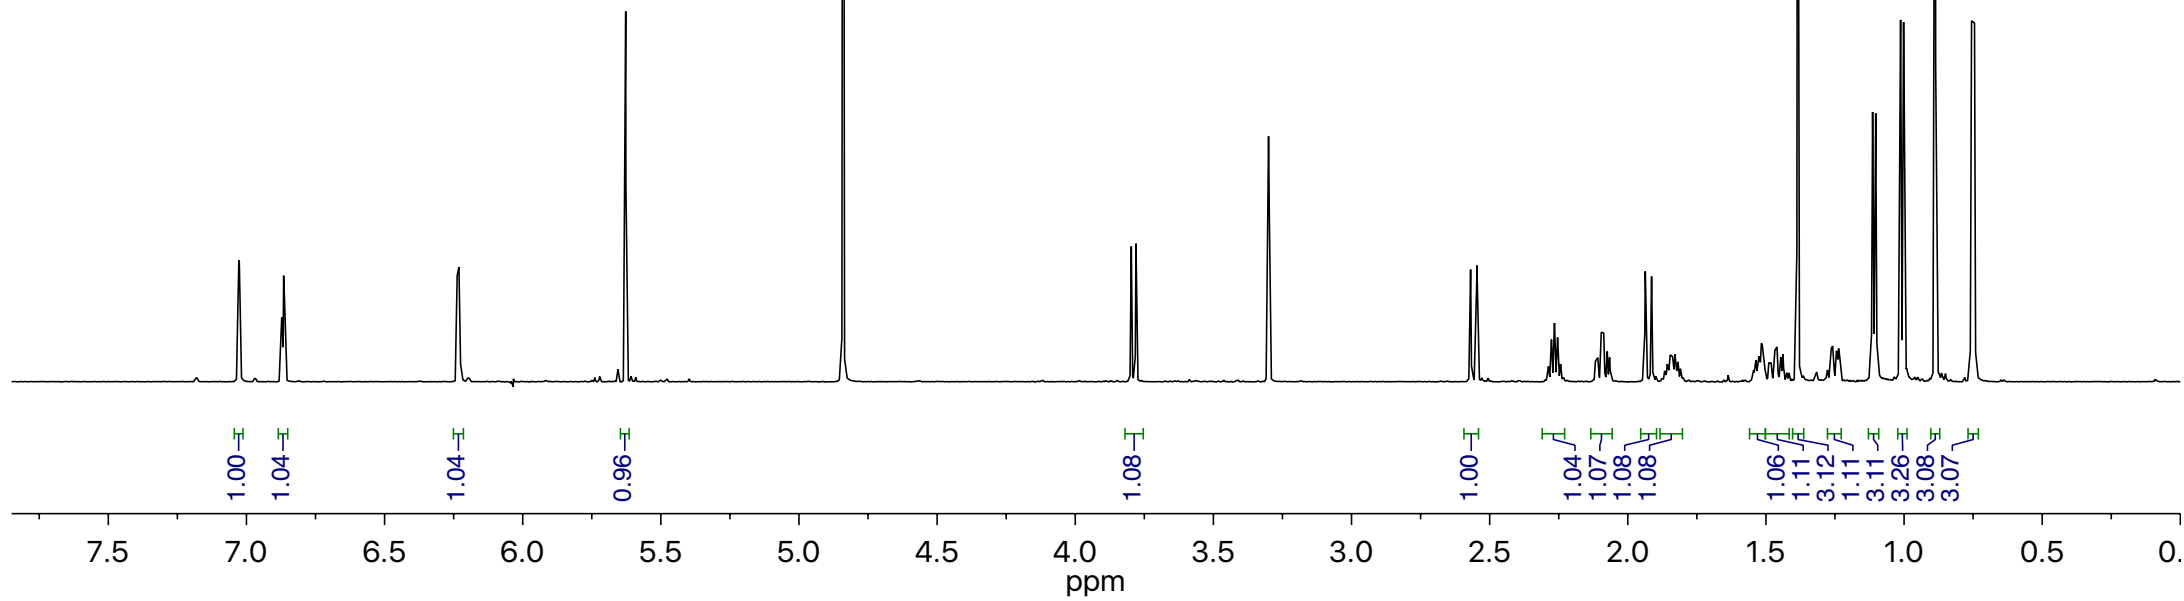

| Parameter              | Value                                                                  |
|------------------------|------------------------------------------------------------------------|
| Data File Name         | / Volumes/ nmrdata/ chenxu91/ nmr/ xuchen-160805-10-67-flashed/ 2/ fid |
| Title                  | xuchen-160805-10-67-flashed.2.fid                                      |
| Origin                 | Bruker BioSpin GmbH                                                    |
| Solvent                | MeOD                                                                   |
| Temperature            | 295.0                                                                  |
| Pulse Sequence         | zgpg30                                                                 |
| Number of Scans        | 1024                                                                   |
| Receiver Gain          | 72.0                                                                   |
| Relaxation Delay       | 2.0000                                                                 |
| Pulse Width            | 10.0000                                                                |
| Acquisition Time       | 1.3631                                                                 |
| Acquisition Date       | 2016-08-06T01:33:49                                                    |
| Spectrometer Frequency | 100.62                                                                 |
| Spectral Width         | 24038.5                                                                |
| Lowest Frequency       | -1818.0                                                                |
| Nucleus                | $^{13}\text{C}$                                                        |
| Acquired Size          | 32768                                                                  |
| Spectral Size          | 65536                                                                  |

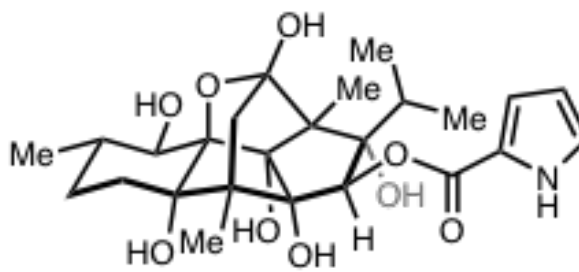

*ryanodine (1)*

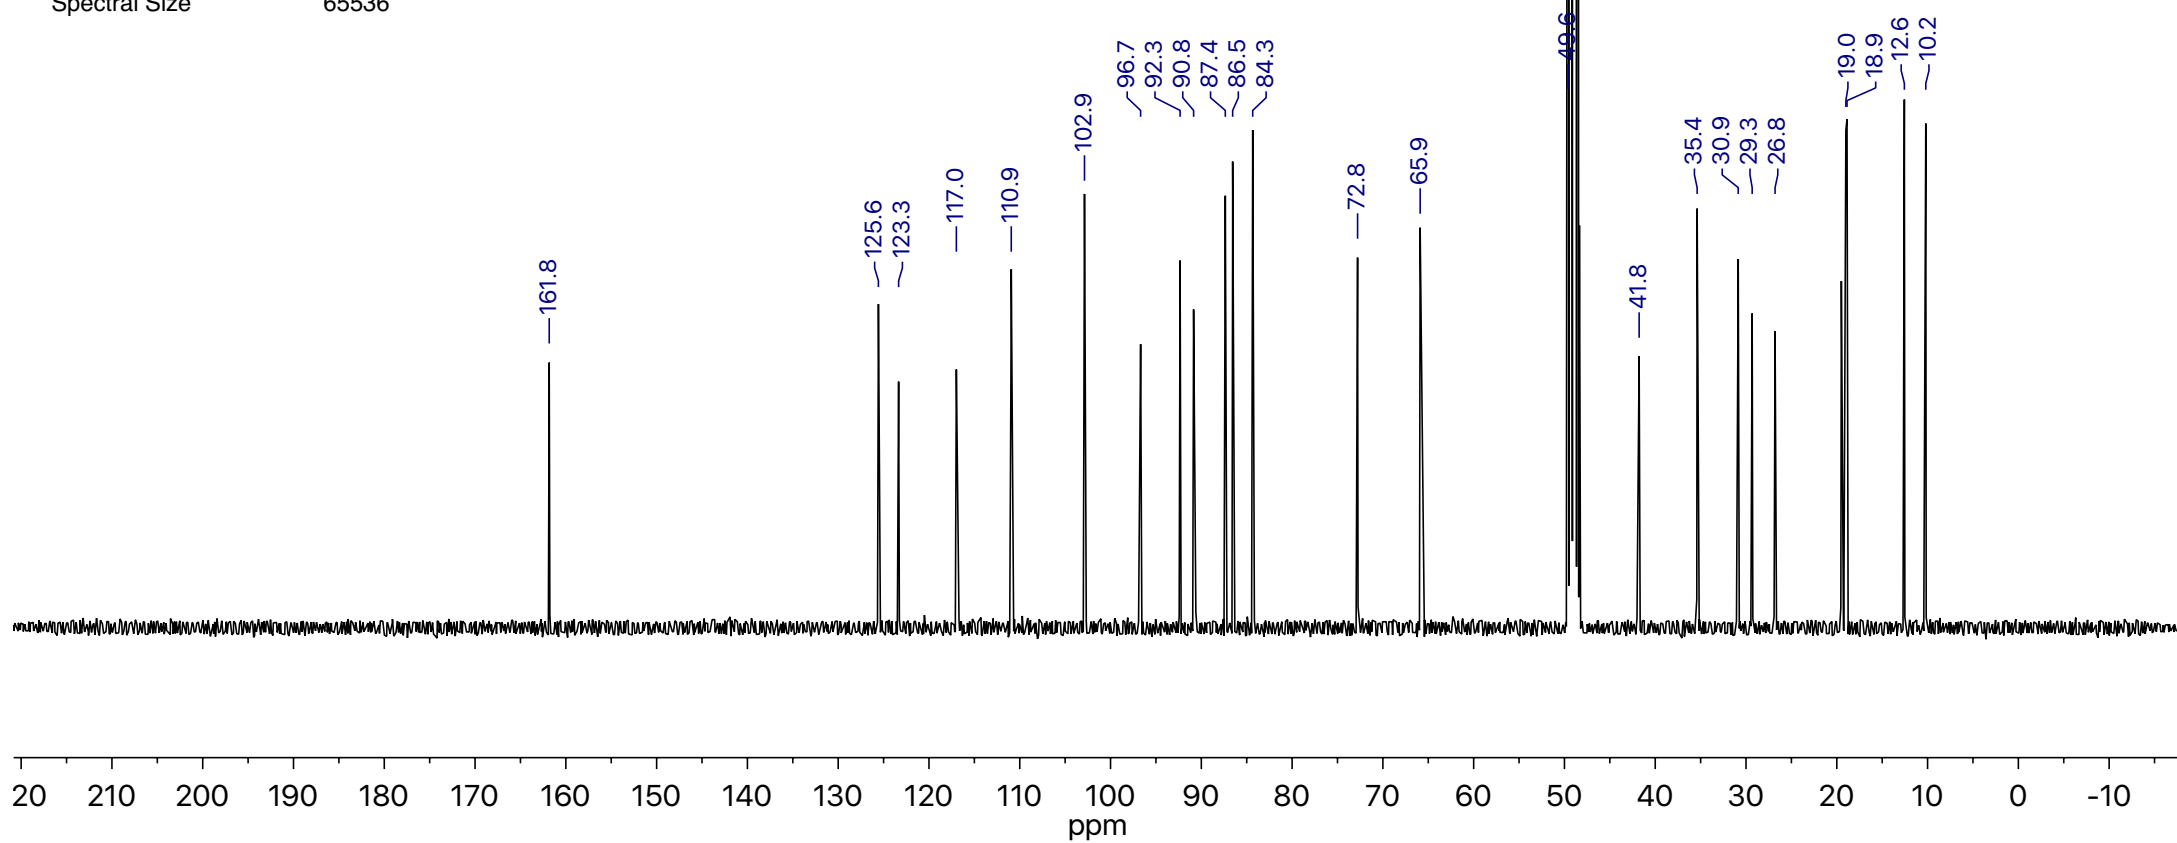

| Parameter              | Value                                                |
|------------------------|------------------------------------------------------|
| Data File Name         | / Volumes/ nmrdata/ ahan/ nmr/ 6-AH-217-2-CH/ 1/ fid |
| Title                  | 6-AH-217-2-CH.1.fid                                  |
| Origin                 | Bruker BioSpin GmbH                                  |
| Solvent                | CDCl3                                                |
| Temperature            | 295.0                                                |
| Pulse Sequence         | zg30                                                 |
| Number of Scans        | 16                                                   |
| Receiver Gain          | 30.3                                                 |
| Relaxation Delay       | 1.0000                                               |
| Pulse Width            | 11.7000                                              |
| Acquisition Time       | 4.0894                                               |
| Acquisition Date       | 2016-08-31T13:44:13                                  |
| Spectrometer Frequency | 400.13                                               |
| Spectral Width         | 8012.8                                               |
| Lowest Frequency       | -1545.6                                              |
| Nucleus                | 1H                                                   |
| Acquired Size          | 32768                                                |
| Spectral Size          | 65536                                                |

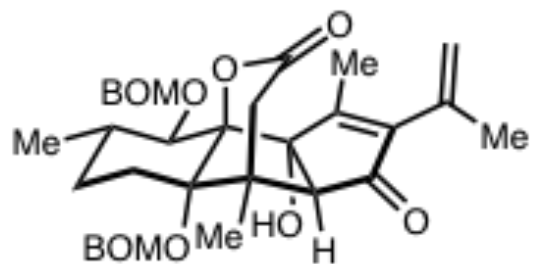

22

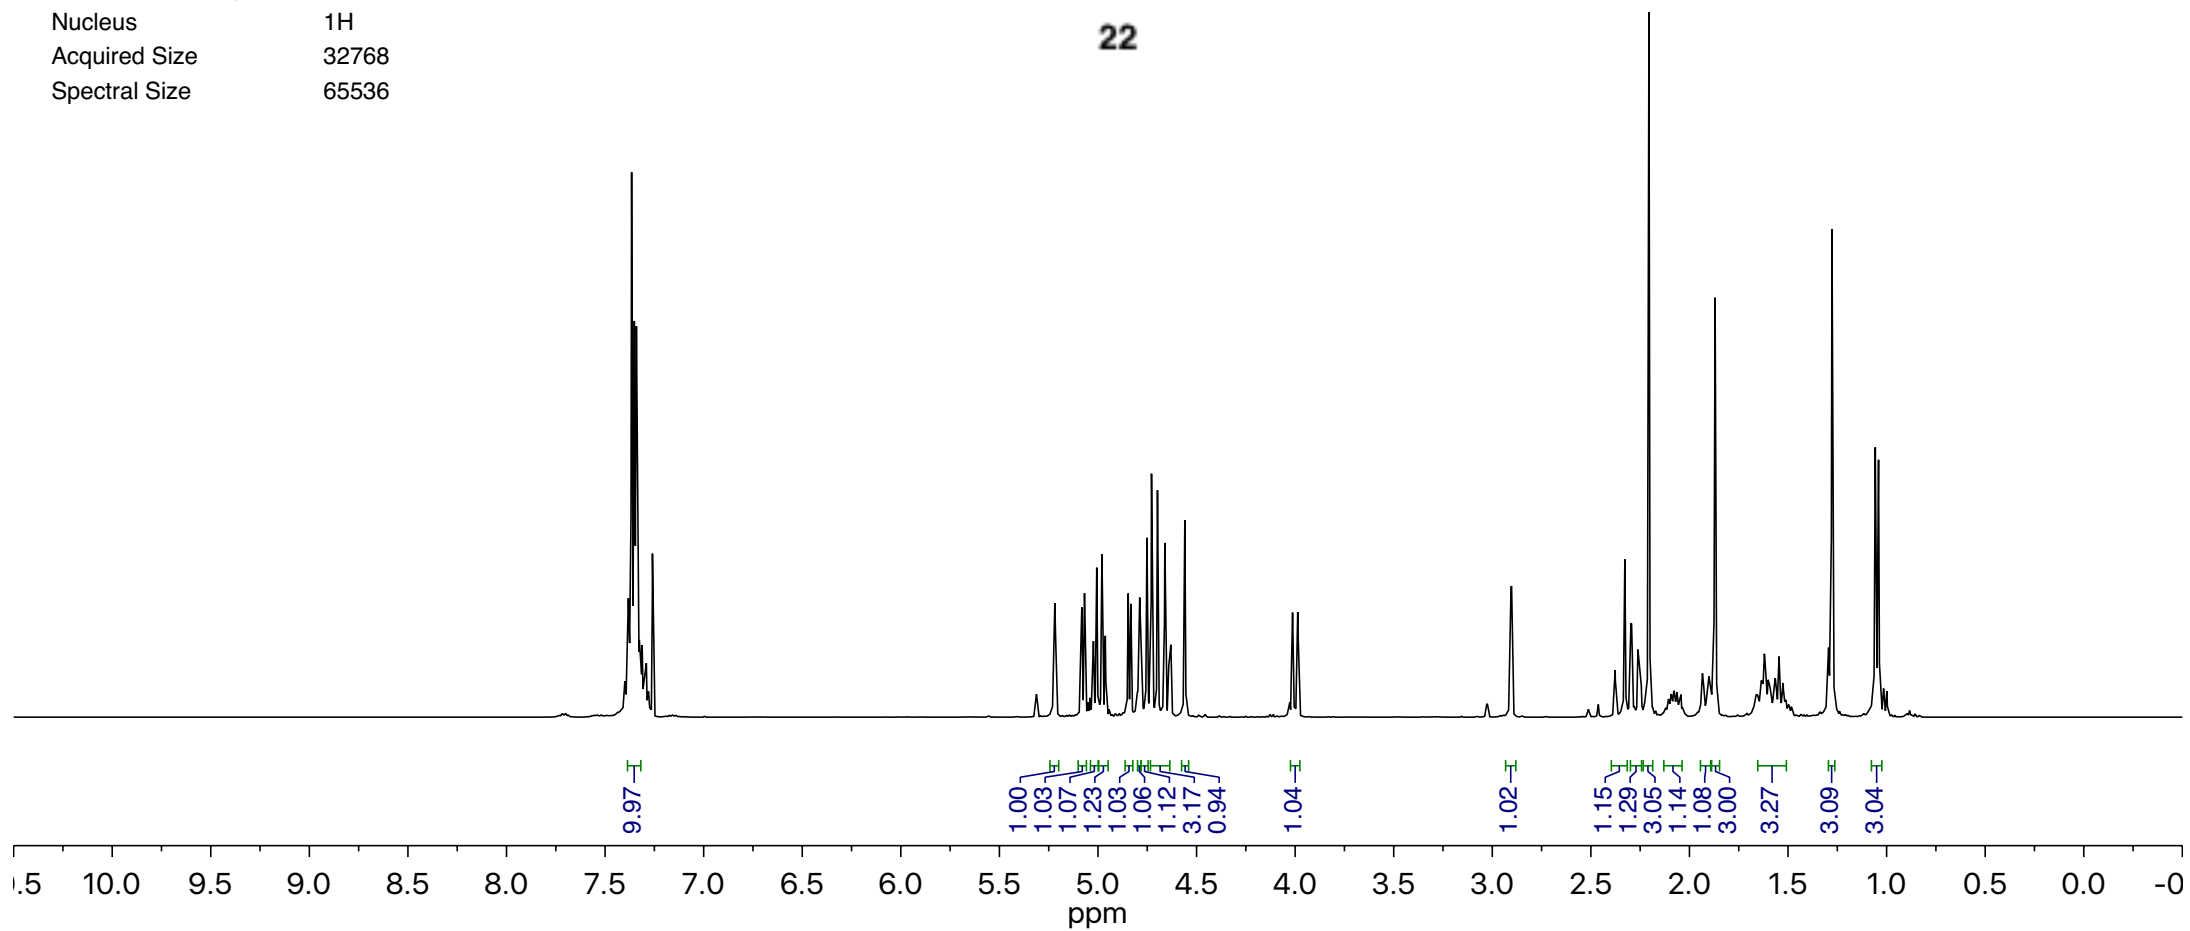

| Parameter              | Value                                           |
|------------------------|-------------------------------------------------|
| Data File Name         | /Volumes/nmrdata/ahan/nmr/6-AH-217-2-CH/ 2/ fid |
| Title                  | 6-AH-217-2-CH.2.fid                             |
| Origin                 | Bruker BioSpin GmbH                             |
| Solvent                | CDCl3                                           |
| Temperature            | 294.9                                           |
| Pulse Sequence         | zgpg30                                          |
| Number of Scans        | 101                                             |
| Receiver Gain          | 64.2                                            |
| Relaxation Delay       | 1.0000                                          |
| Pulse Width            | 10.0000                                         |
| Acquisition Time       | 1.3631                                          |
| Acquisition Date       | 2016-08-31T13:48:49                             |
| Spectrometer Frequency | 100.62                                          |
| Spectral Width         | 24038.5                                         |
| Lowest Frequency       | -1965.5                                         |
| Nucleus                | <sup>13</sup> C                                 |
| Acquired Size          | 32768                                           |
| Spectral Size          | 65536                                           |

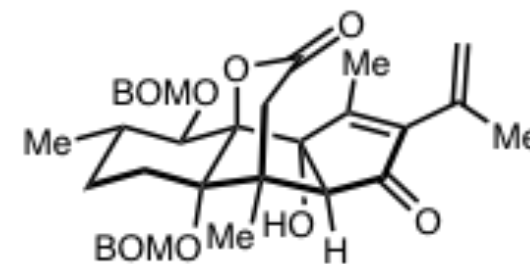

22

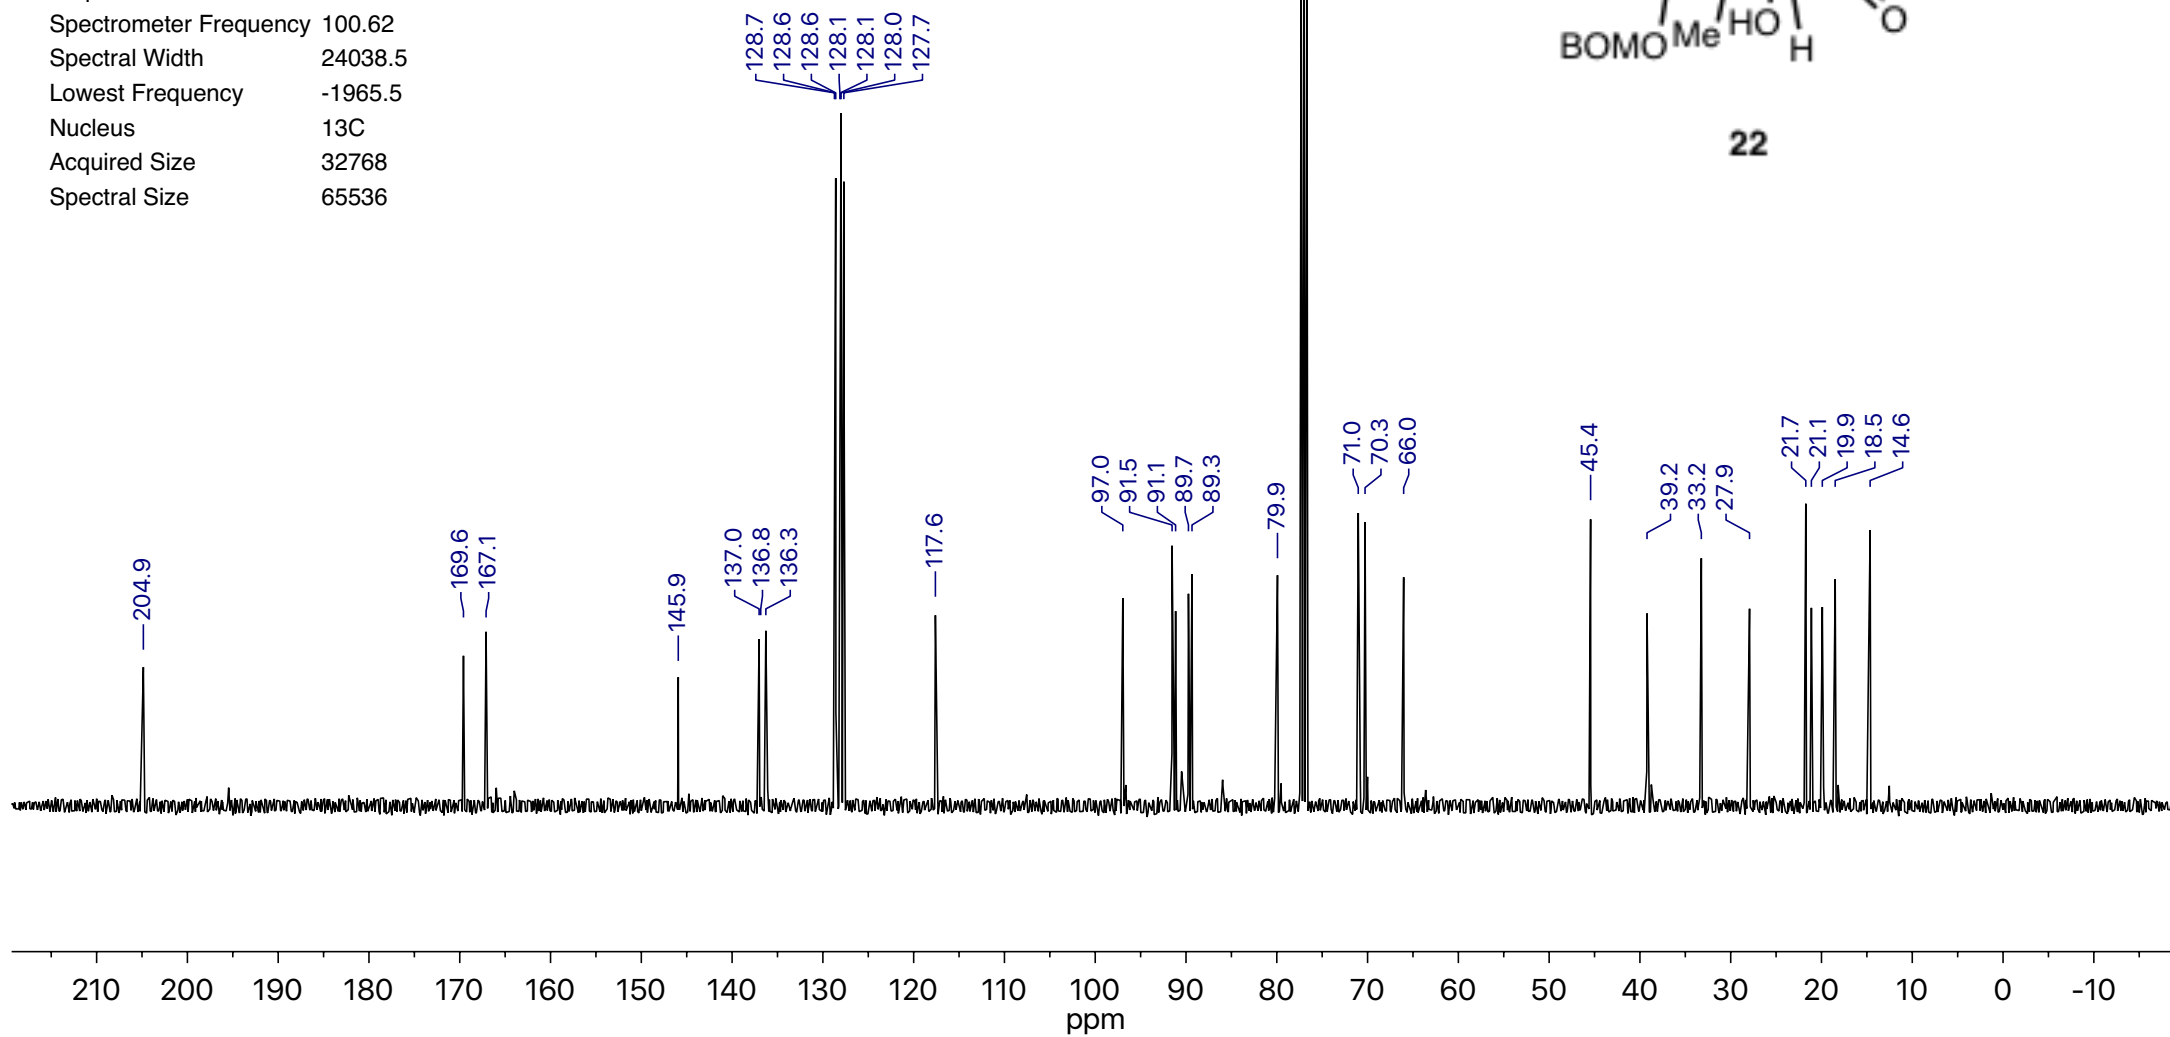



| Parameter              | Value                                         |
|------------------------|-----------------------------------------------|
| Data File Name         | /Volumes/nmrdata/ahan/nmr/6-AH-265-CH/ 1/ fid |
| Title                  | 6-AH-265-CH.1.fid                             |
| Origin                 | Bruker BioSpin GmbH                           |
| Solvent                | CDCl3                                         |
| Temperature            | 294.9                                         |
| Pulse Sequence         | zg30                                          |
| Number of Scans        | 8                                             |
| Receiver Gain          | 30.3                                          |
| Relaxation Delay       | 1.0000                                        |
| Pulse Width            | 11.7000                                       |
| Acquisition Time       | 4.0894                                        |
| Acquisition Date       | 2016-09-02T09:14:07                           |
| Spectrometer Frequency | 400.13                                        |
| Spectral Width         | 8012.8                                        |
| Lowest Frequency       | -1545.6                                       |
| Nucleus                | 1H                                            |
| Acquired Size          | 32768                                         |
| Spectral Size          | 65536                                         |

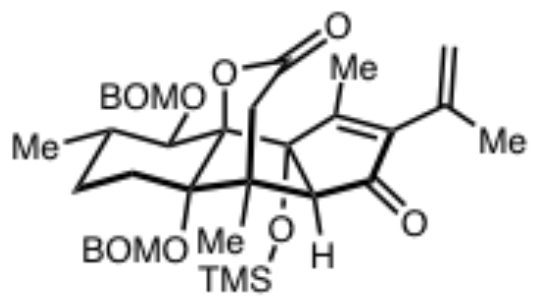

S13

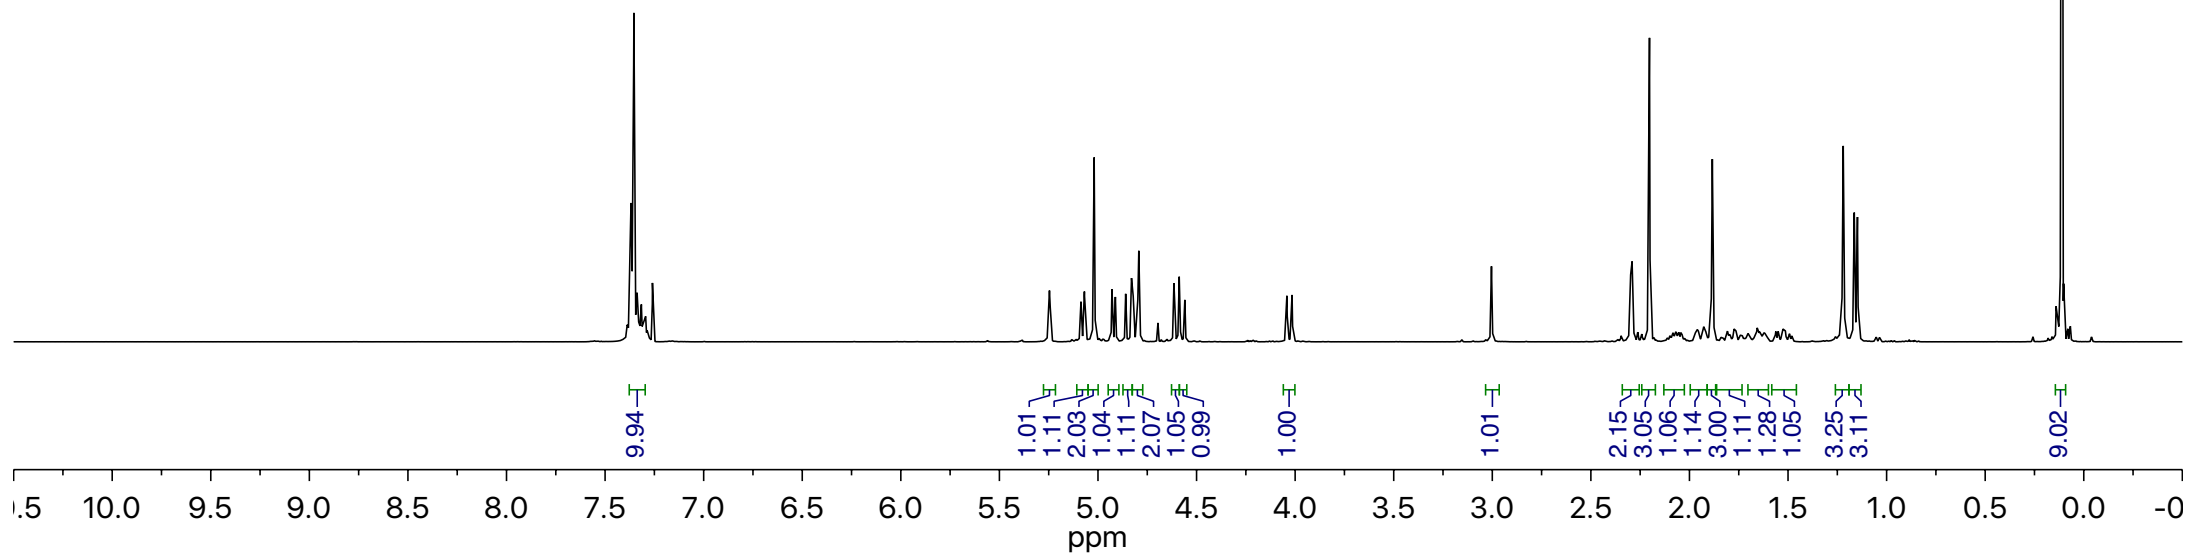

| Parameter              | Value                                         |
|------------------------|-----------------------------------------------|
| Data File Name         | /Volumes/nmrdata/ahan/nmr/6-AH-265-CH/ 2/ fid |
| Title                  | 6-AH-265-CH.2.fid                             |
| Origin                 | Bruker BioSpin GmbH                           |
| Solvent                | CDCl3                                         |
| Temperature            | 295.0                                         |
| Pulse Sequence         | zgpg30                                        |
| Number of Scans        | 105                                           |
| Receiver Gain          | 64.2                                          |
| Relaxation Delay       | 1.0000                                        |
| Pulse Width            | 10.0000                                       |
| Acquisition Time       | 1.3631                                        |
| Acquisition Date       | 2016-09-02T09:18:53                           |
| Spectrometer Frequency | 100.62                                        |
| Spectral Width         | 24038.5                                       |
| Lowest Frequency       | -1965.9                                       |
| Nucleus                | 13C                                           |
| Acquired Size          | 32768                                         |
| Spectral Size          | 65536                                         |

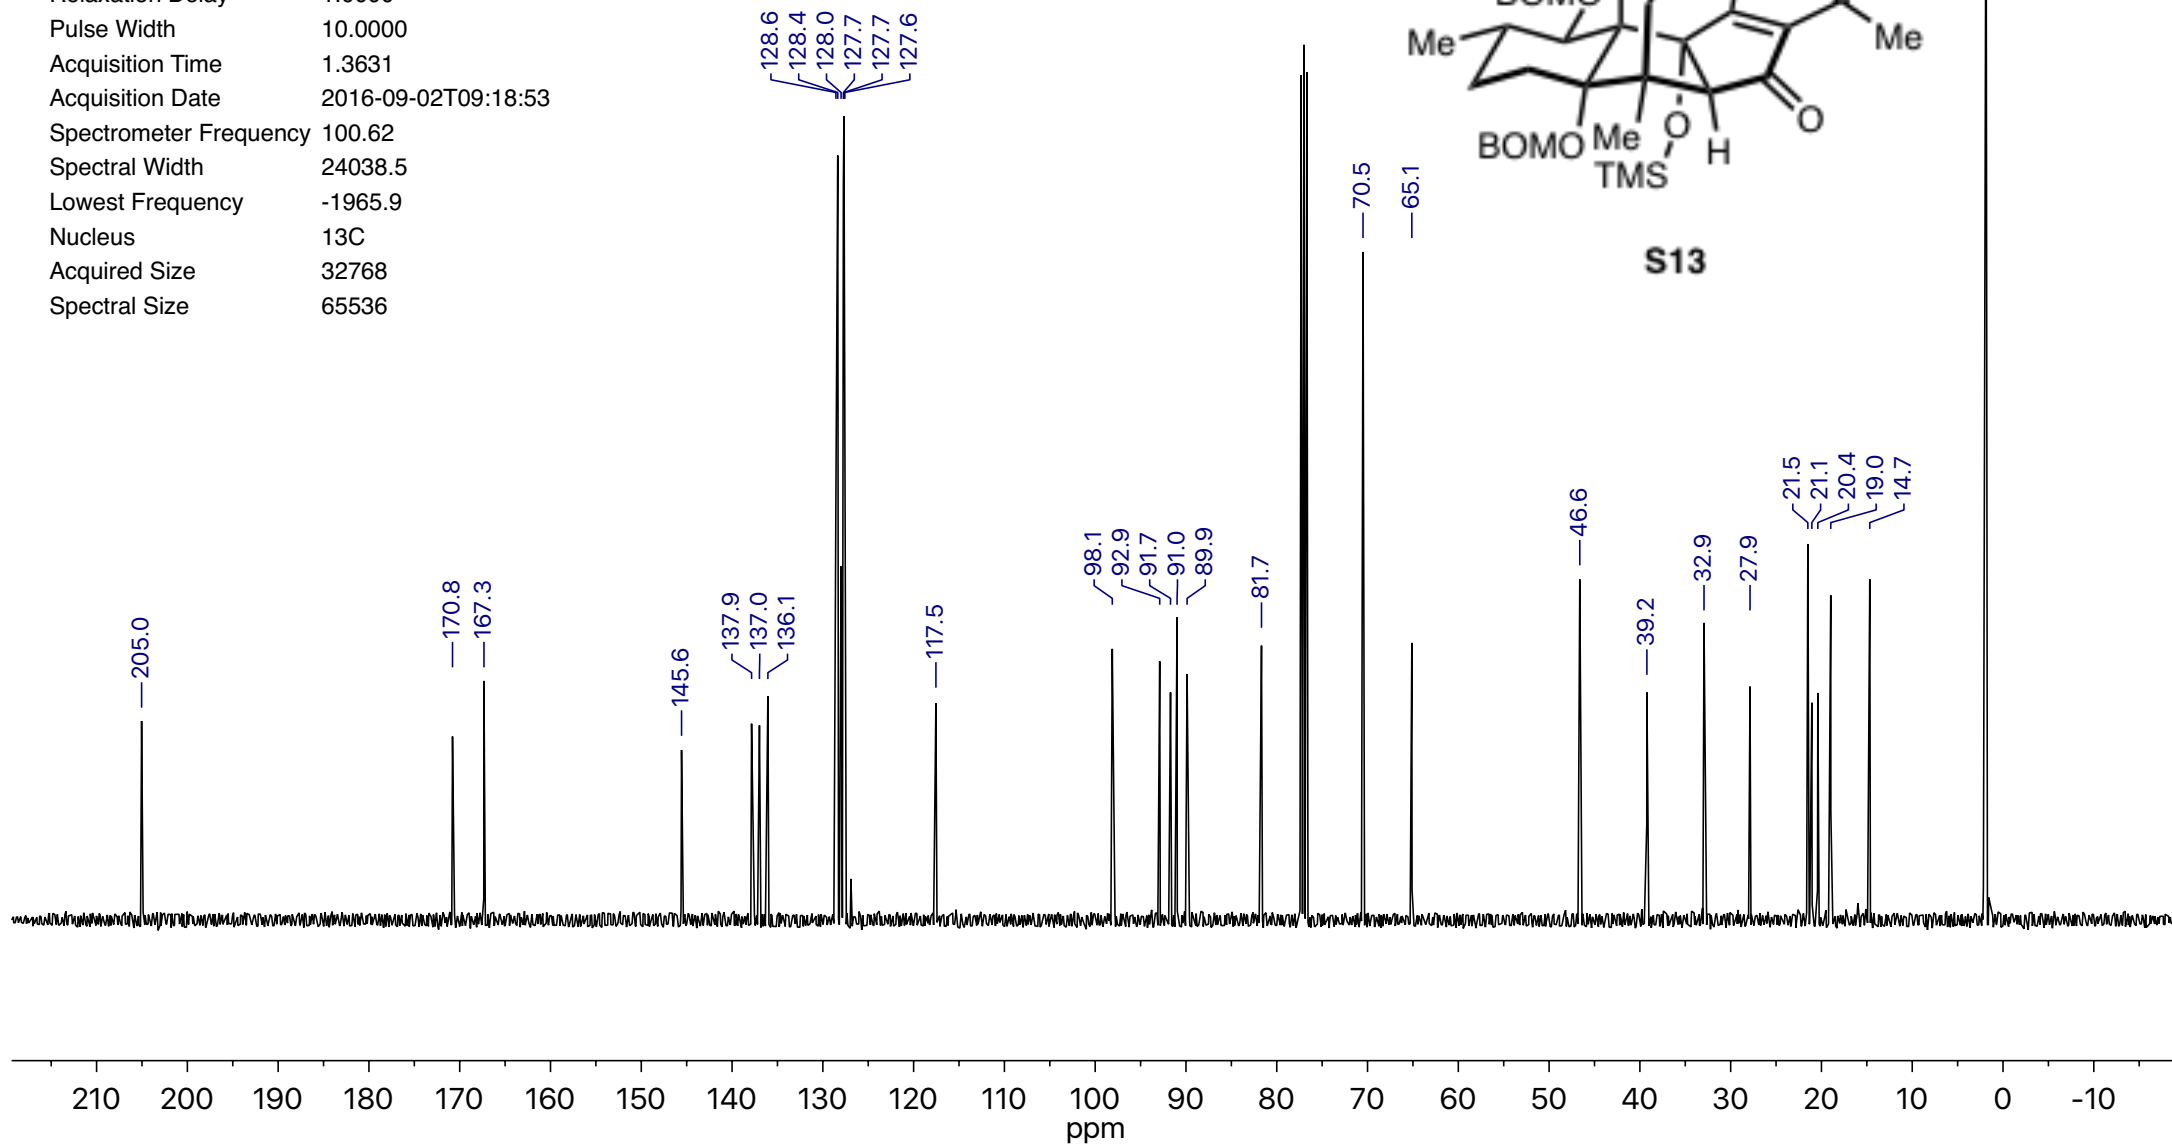

| Parameter              | Value                                              |
|------------------------|----------------------------------------------------|
| Data File Name         | / Volumes/ nmrdata/ ahan/ nmr/ 6-AH-225-CH/ 1/ fid |
| Title                  | 6-AH-225-CH.1.fid                                  |
| Origin                 | Bruker BioSpin GmbH                                |
| Solvent                | CDCl3                                              |
| Temperature            | 294.9                                              |
| Pulse Sequence         | zg30                                               |
| Number of Scans        | 6                                                  |
| Receiver Gain          | 30.3                                               |
| Relaxation Delay       | 1.0000                                             |
| Pulse Width            | 11.7000                                            |
| Acquisition Time       | 4.0894                                             |
| Acquisition Date       | 2016-09-06T11:57:21                                |
| Spectrometer Frequency | 400.13                                             |
| Spectral Width         | 8012.8                                             |
| Lowest Frequency       | -1545.5                                            |
| Nucleus                | 1H                                                 |
| Acquired Size          | 32768                                              |
| Spectral Size          | 65536                                              |

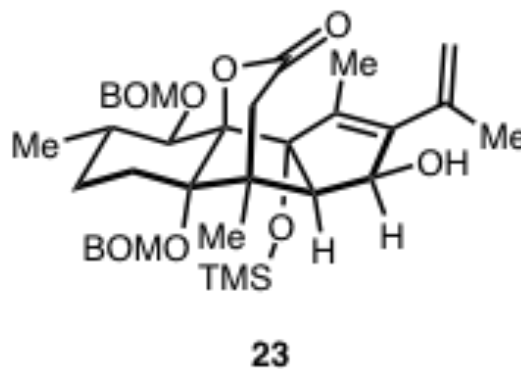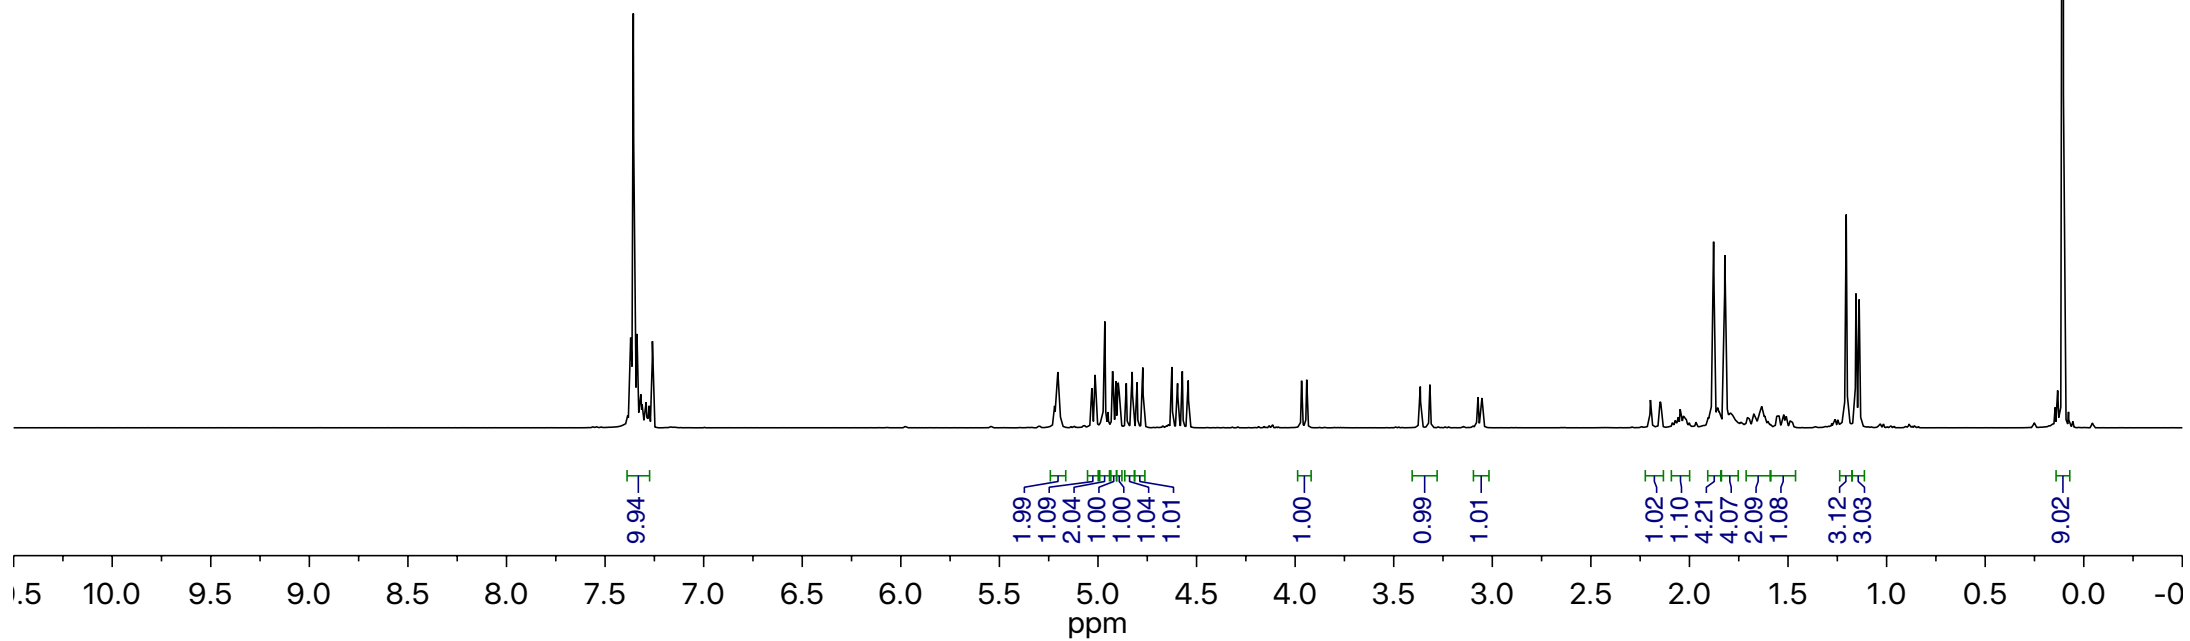

| Parameter              | Value                                         |
|------------------------|-----------------------------------------------|
| Data File Name         | /Volumes/nmrdata/ahan/nmr/6-AH-225-CH/ 2/ fid |
| Title                  | 6-AH-225-CH.2.fid                             |
| Origin                 | Bruker BioSpin GmbH                           |
| Solvent                | CDCl3                                         |
| Temperature            | 295.0                                         |
| Pulse Sequence         | zgpg30                                        |
| Number of Scans        | 101                                           |
| Receiver Gain          | 64.2                                          |
| Relaxation Delay       | 1.0000                                        |
| Pulse Width            | 10.0000                                       |
| Acquisition Time       | 1.3631                                        |
| Acquisition Date       | 2016-09-06T12:01:57                           |
| Spectrometer Frequency | 100.62                                        |
| Spectral Width         | 24038.5                                       |
| Lowest Frequency       | -1964.6                                       |
| Nucleus                | <sup>13</sup> C                               |
| Acquired Size          | 32768                                         |
| Spectral Size          | 65536                                         |

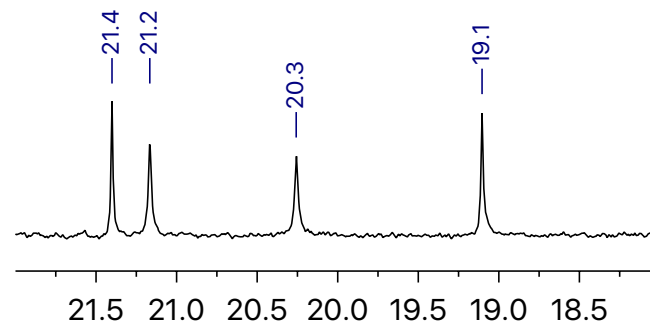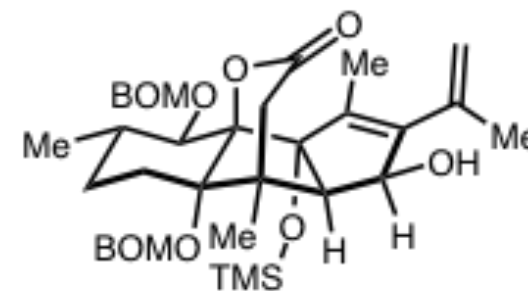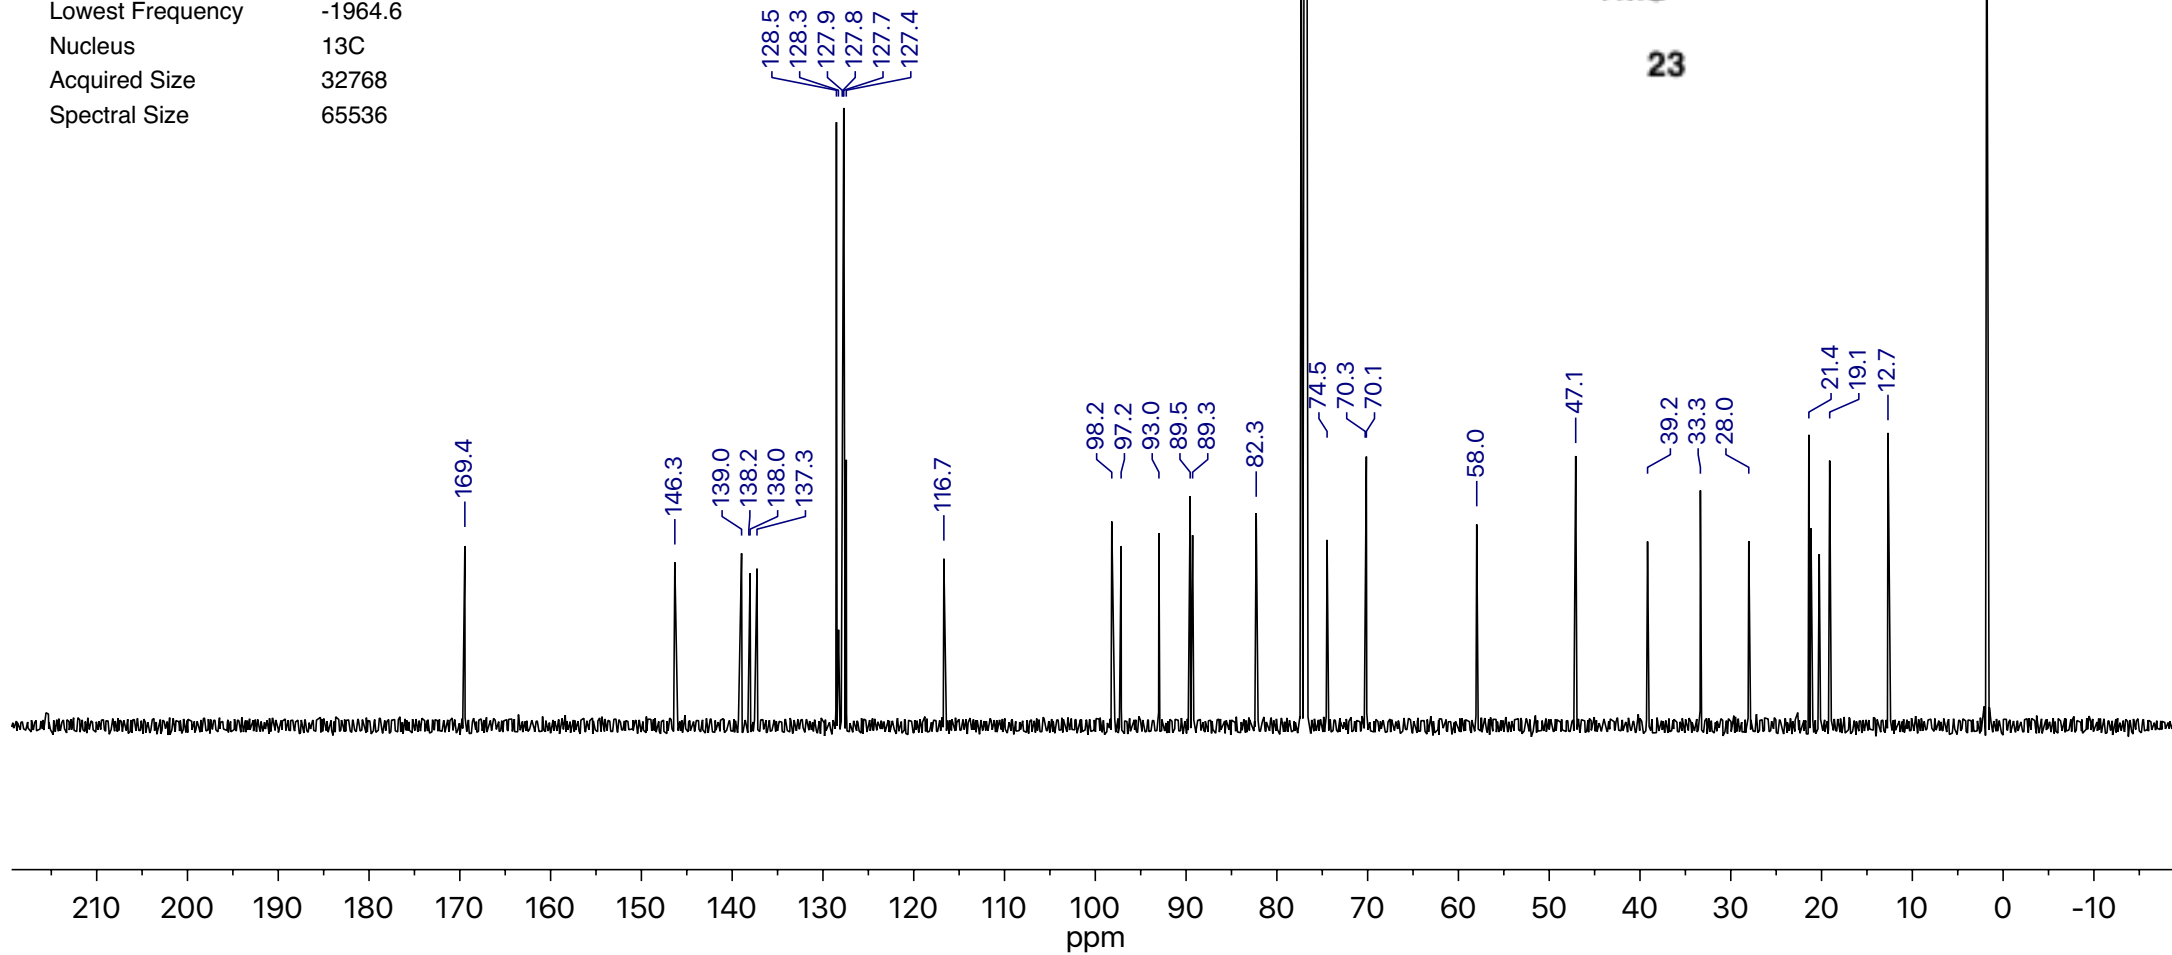

| Parameter              | Value                                       |
|------------------------|---------------------------------------------|
| Data File Name         | /Volumes/nmrdata/ahan/nmr/6-AH-211-CH/1/fid |
| Title                  | 6-AH-211-CH.1.fid                           |
| Origin                 | Bruker BioSpin GmbH                         |
| Solvent                | CDCl3                                       |
| Temperature            | 294.9                                       |
| Pulse Sequence         | zg30                                        |
| Number of Scans        | 8                                           |
| Receiver Gain          | 197.4                                       |
| Relaxation Delay       | 1.0000                                      |
| Pulse Width            | 11.7000                                     |
| Acquisition Time       | 4.0894                                      |
| Acquisition Date       | 2016-07-20T20:19:29                         |
| Spectrometer Frequency | 400.13                                      |
| Spectral Width         | 8012.8                                      |
| Lowest Frequency       | -1545.7                                     |
| Nucleus                | 1H                                          |
| Acquired Size          | 32768                                       |
| Spectral Size          | 65536                                       |

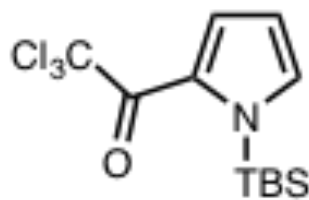**24**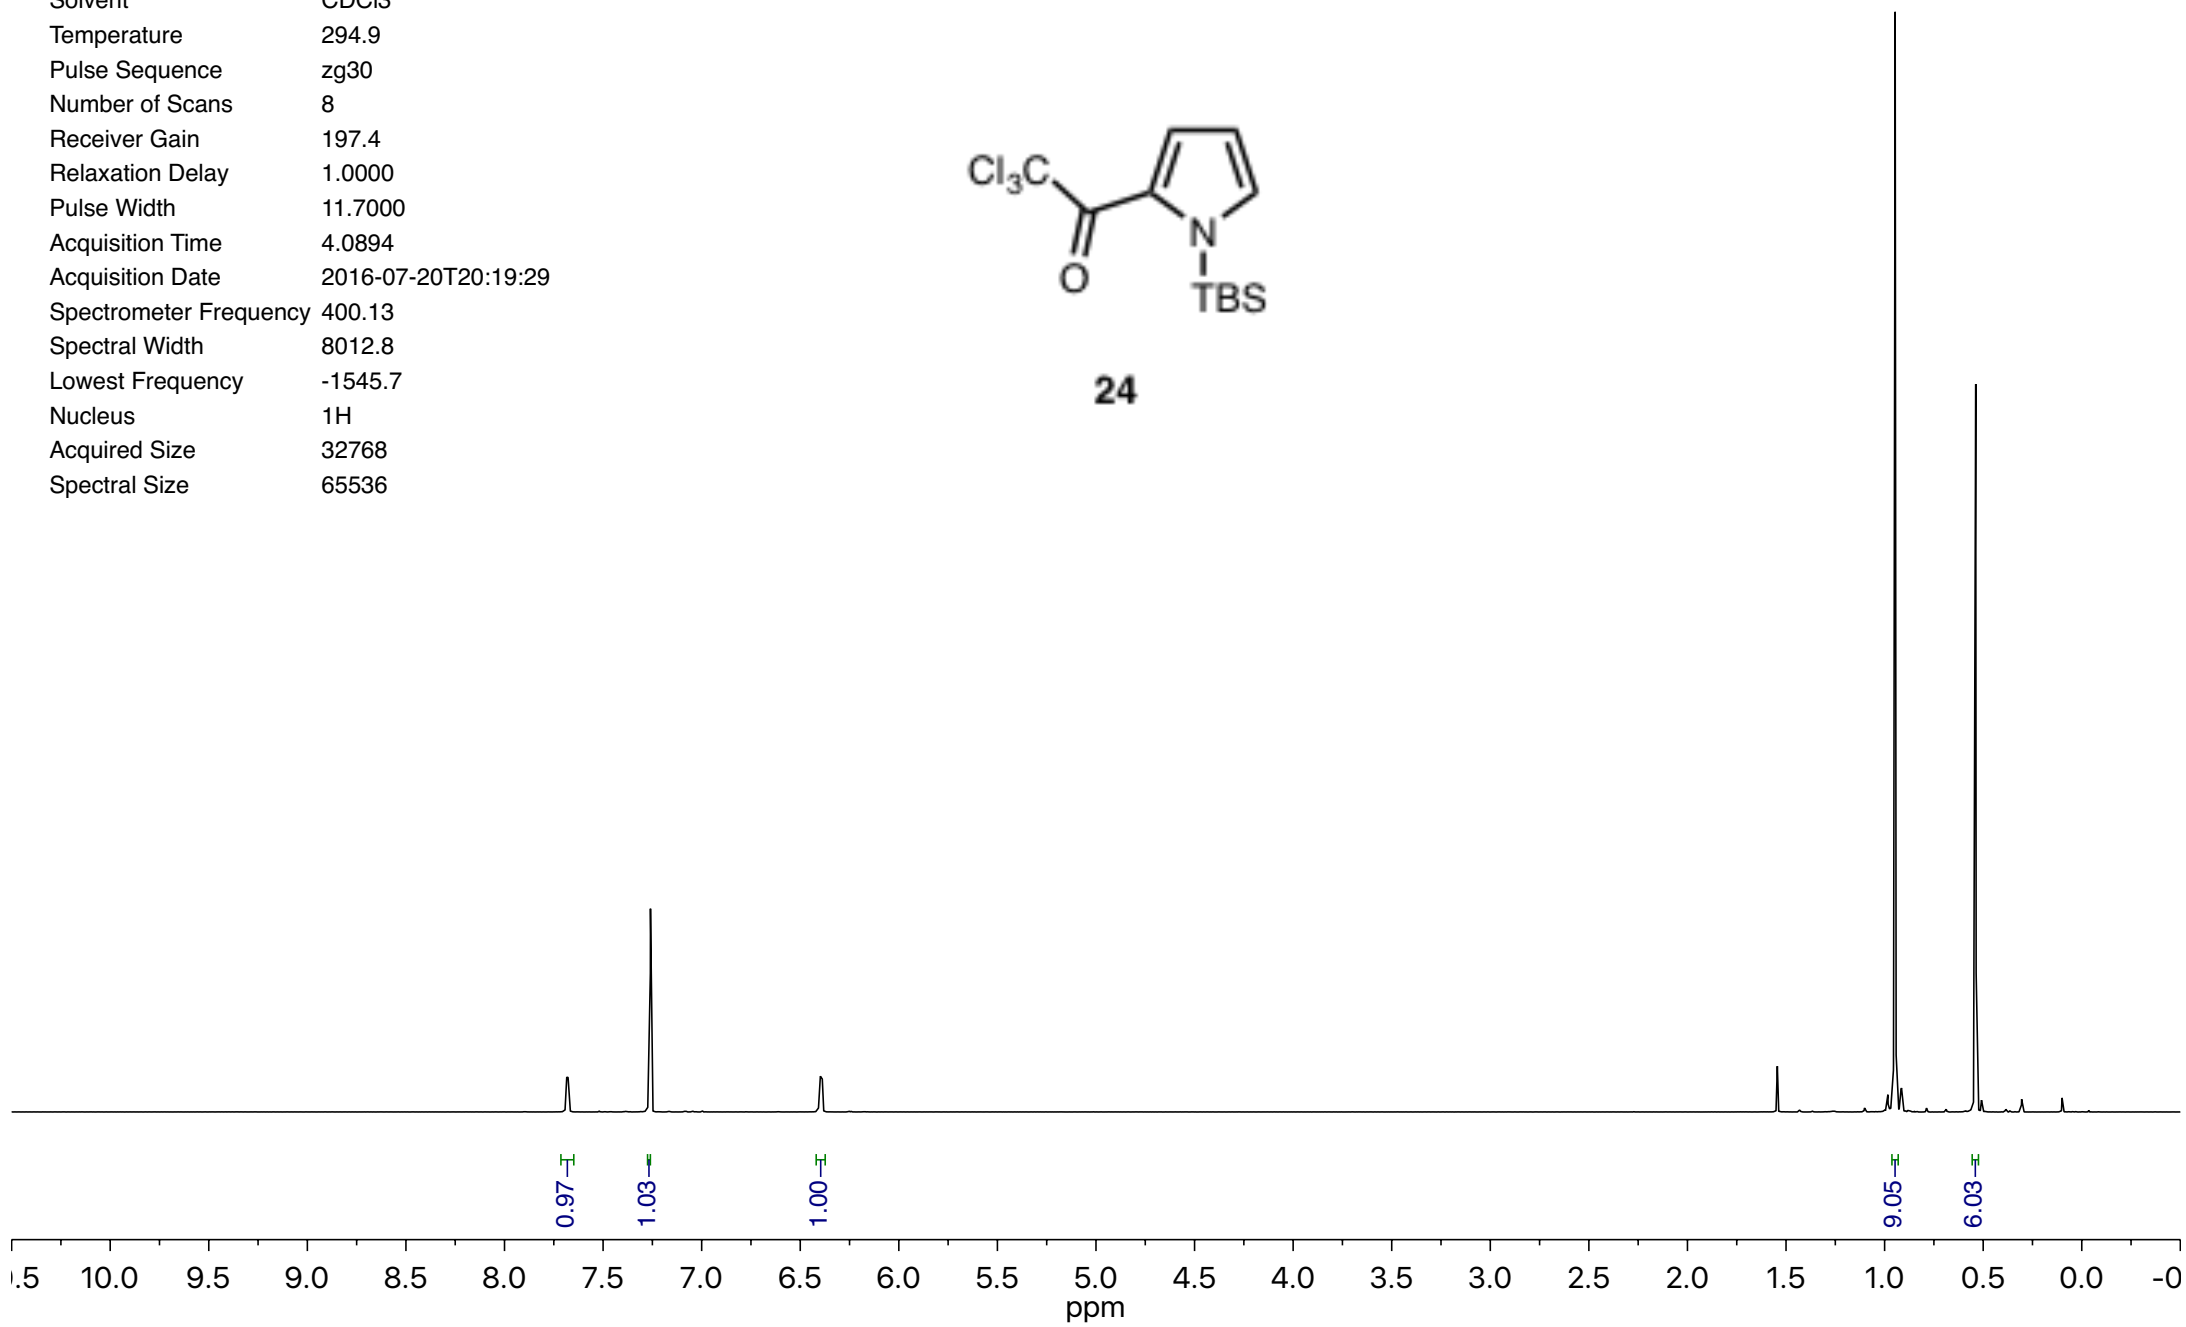

| Parameter              | Value                                            |
|------------------------|--------------------------------------------------|
| Data File Name         | /Volumes/nmrdata/ ahan/ nmr/ 6-AH-211-CH/ 5/ fid |
| Title                  | 6-AH-211-CH.5.fid                                |
| Origin                 | Bruker BioSpin GmbH                              |
| Solvent                | CDCl3                                            |
| Temperature            | 295.0                                            |
| Pulse Sequence         | zgpg30                                           |
| Number of Scans        | 128                                              |
| Receiver Gain          | 78.7                                             |
| Relaxation Delay       | 2.0000                                           |
| Pulse Width            | 10.0000                                          |
| Acquisition Time       | 1.3631                                           |
| Acquisition Date       | 2016-07-20T21:16:39                              |
| Spectrometer Frequency | 100.62                                           |
| Spectral Width         | 24038.5                                          |
| Lowest Frequency       | -1960.5                                          |
| Nucleus                | 13C                                              |
| Acquired Size          | 32768                                            |
| Spectral Size          | 65536                                            |

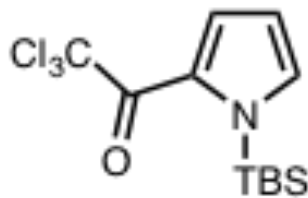

24

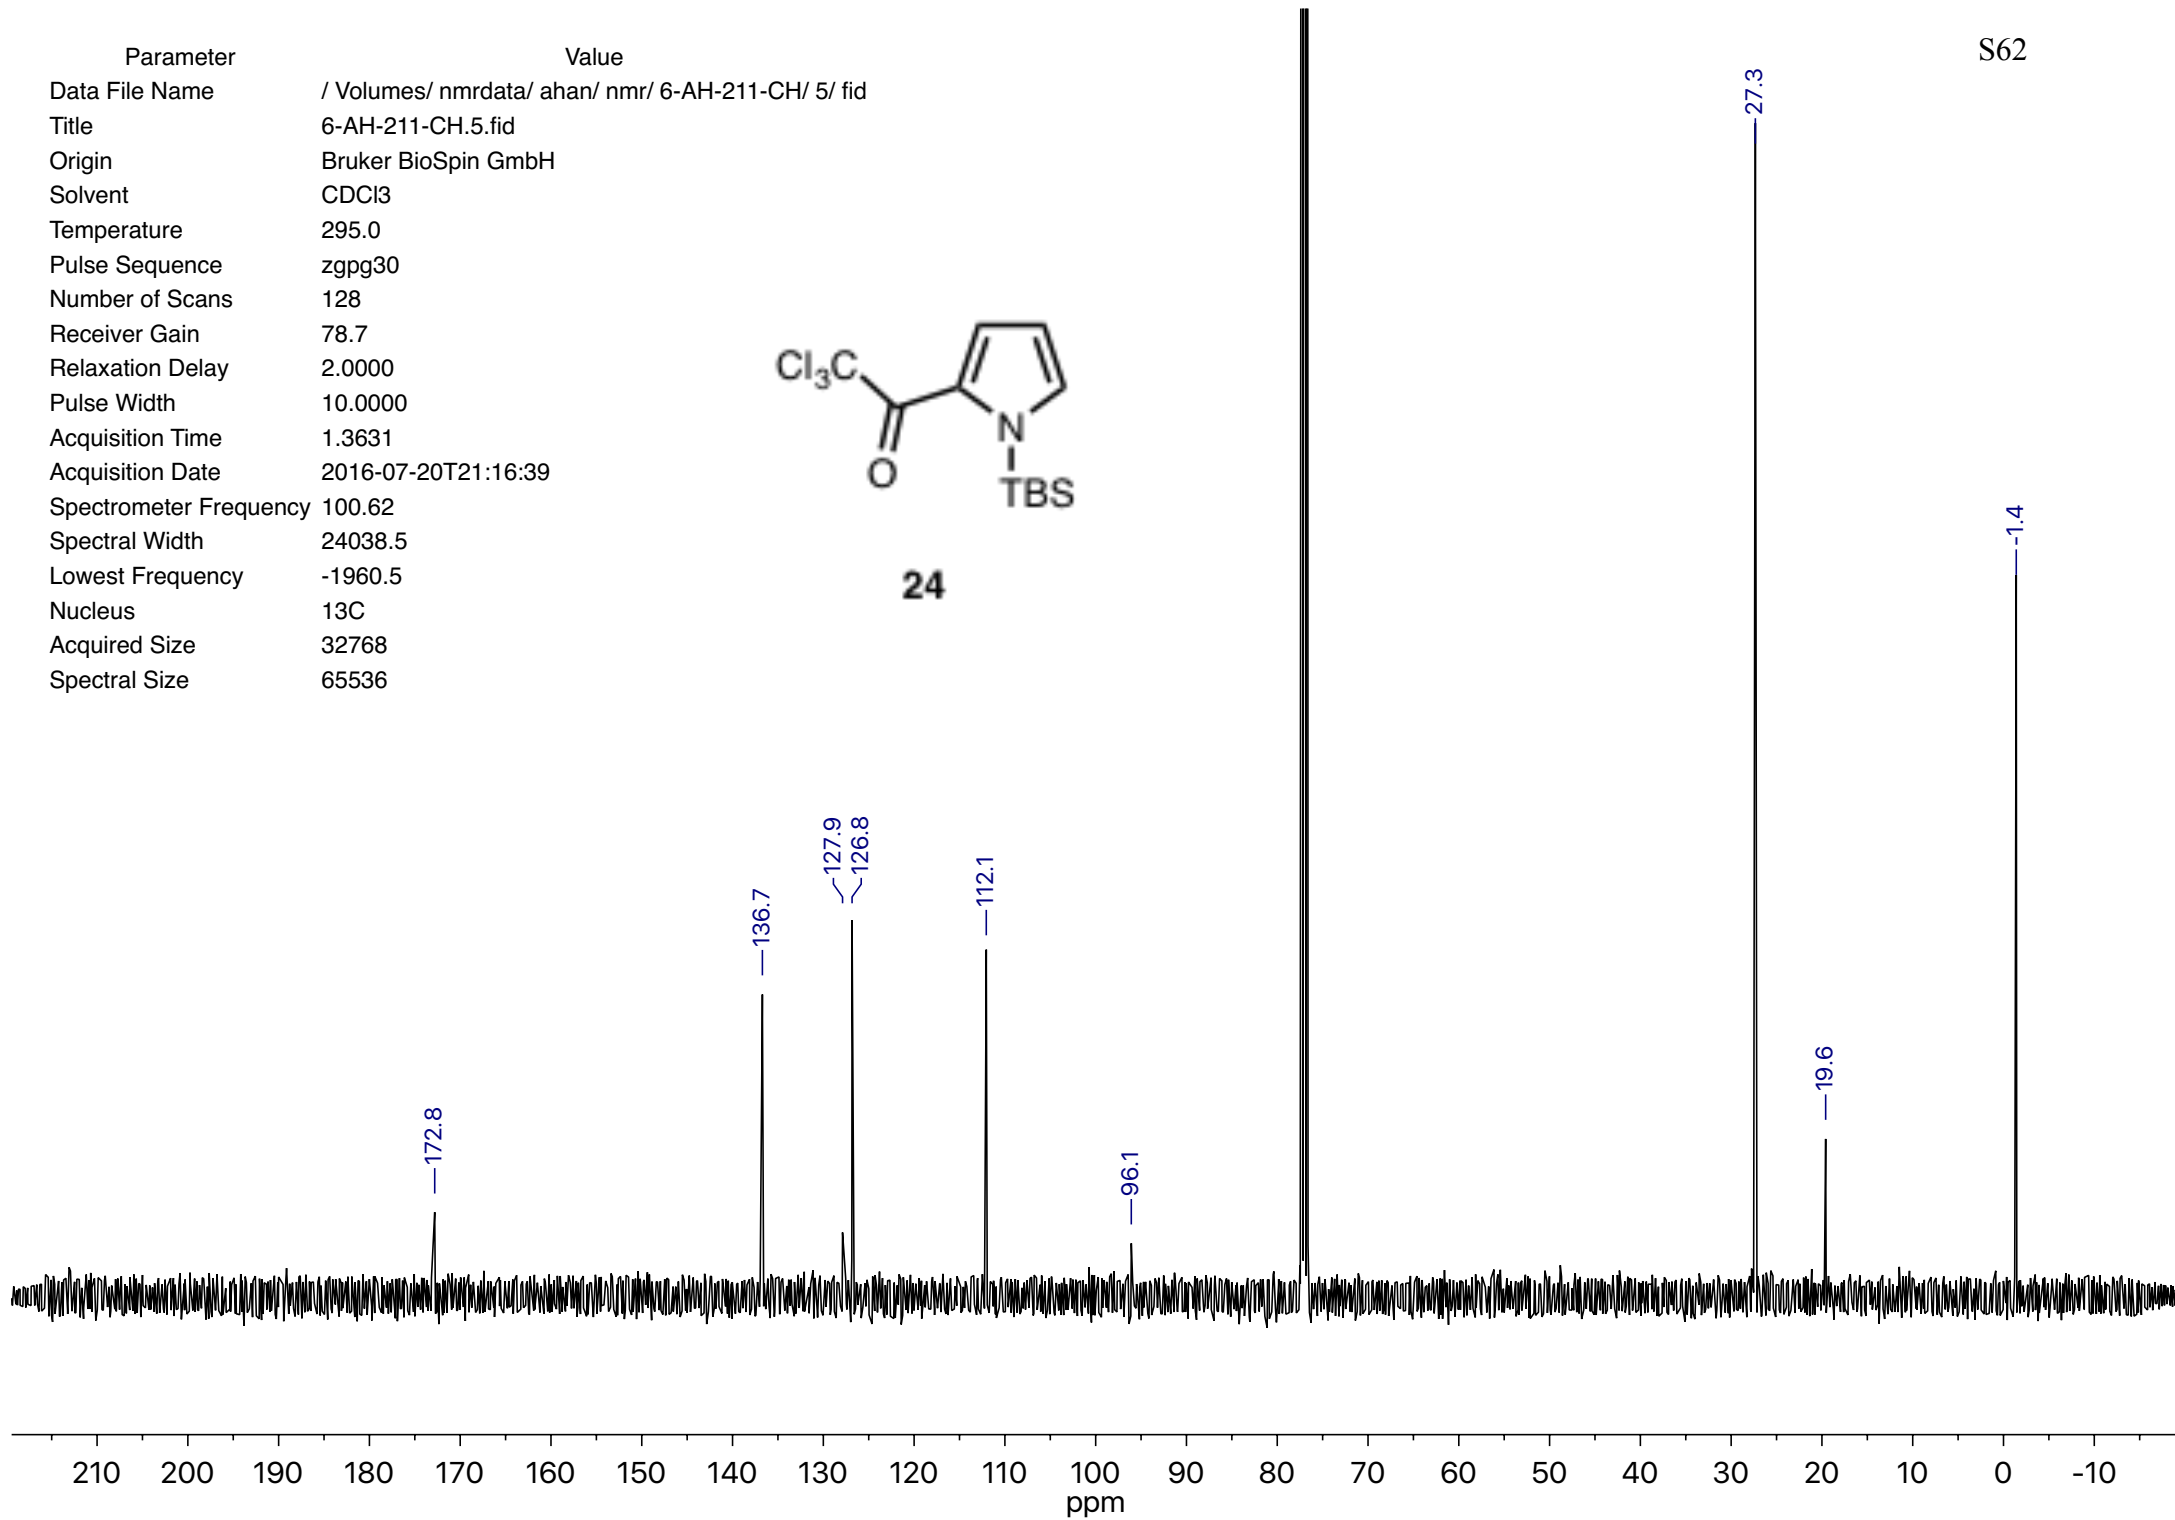

| Parameter              | Value                                       |
|------------------------|---------------------------------------------|
| Data File Name         | /Volumes/nmrdata/ahan/nmr/6-AH-273-CH/1/fid |
| Title                  | 6-AH-273-CH.1.fid                           |
| Origin                 | Bruker BioSpin GmbH                         |
| Solvent                | CDCl3                                       |
| Temperature            | 295.0                                       |
| Pulse Sequence         | zg30                                        |
| Number of Scans        | 8                                           |
| Receiver Gain          | 127.1                                       |
| Relaxation Delay       | 1.0000                                      |
| Pulse Width            | 11.7000                                     |
| Acquisition Time       | 4.0894                                      |
| Acquisition Date       | 2016-09-07T19:17:41                         |
| Spectrometer Frequency | 400.13                                      |
| Spectral Width         | 8012.8                                      |
| Lowest Frequency       | -1545.6                                     |
| Nucleus                | 1H                                          |
| Acquired Size          | 32768                                       |
| Spectral Size          | 65536                                       |

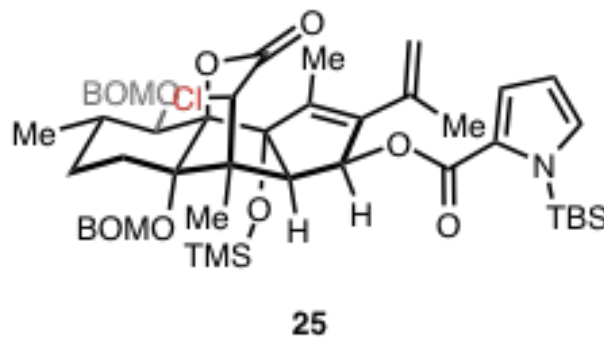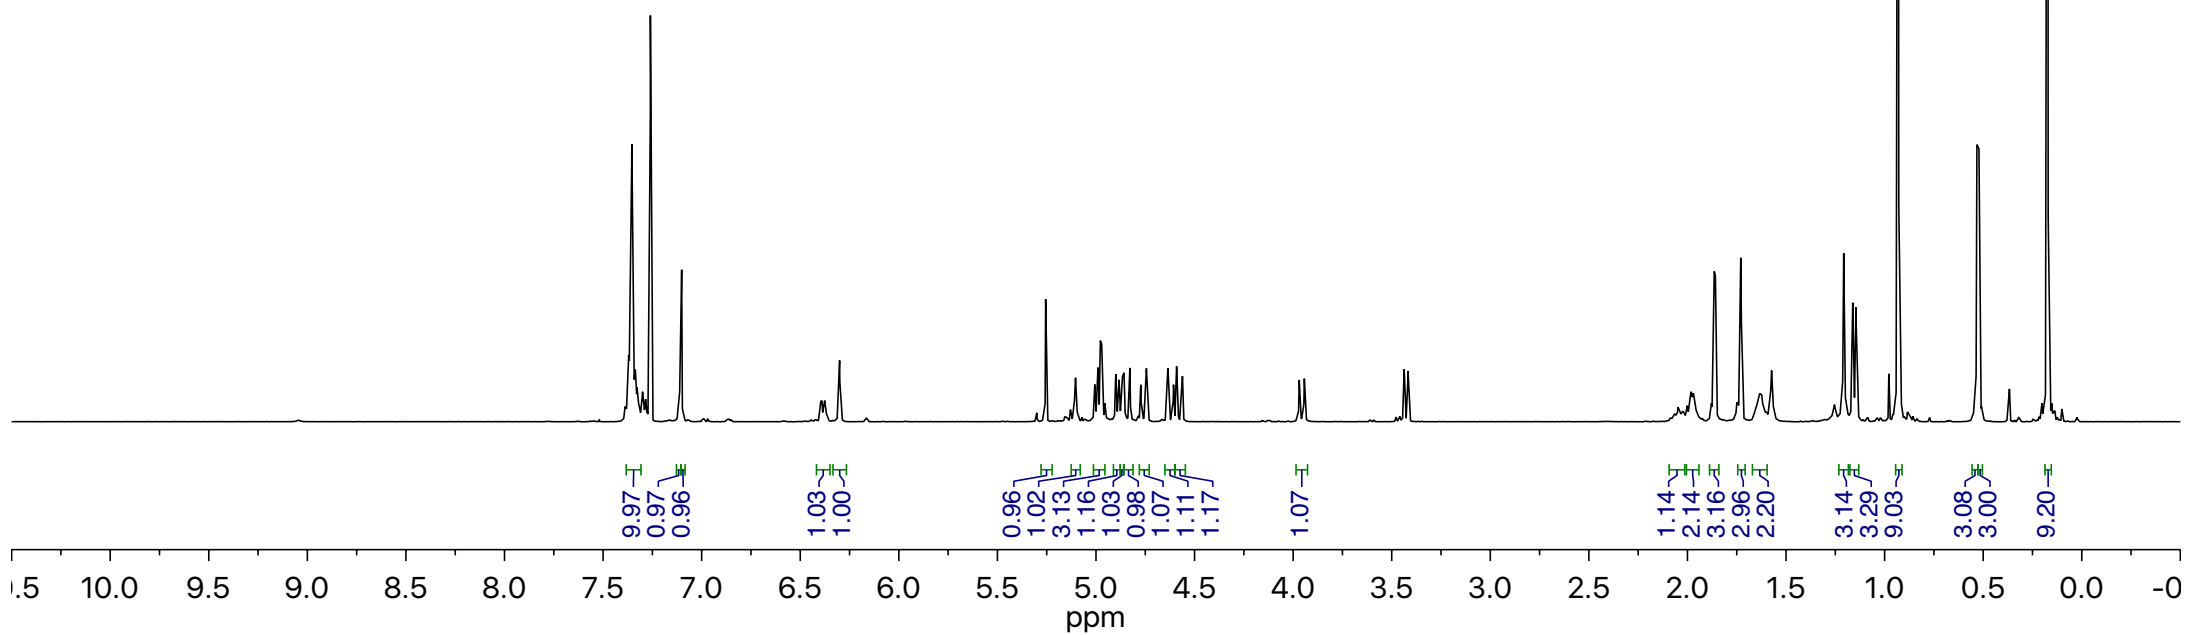

| Parameter              | Value                                        |
|------------------------|----------------------------------------------|
| Data File Name         | /Volumes/nmrdata/ahan/nmr/6-AH-273-CH/7/ fid |
| Title                  | 6-AH-273-CH.7.fid                            |
| Origin                 | Bruker BioSpin GmbH                          |
| Solvent                | CDCl3                                        |
| Temperature            | 295.0                                        |
| Pulse Sequence         | zgpg30                                       |
| Number of Scans        | 3000                                         |
| Receiver Gain          | 55.5                                         |
| Relaxation Delay       | 1.0000                                       |
| Pulse Width            | 10.0000                                      |
| Acquisition Time       | 1.3631                                       |
| Acquisition Date       | 2016-09-08T03:12:22                          |
| Spectrometer Frequency | 100.62                                       |
| Spectral Width         | 24038.5                                      |
| Lowest Frequency       | -1961.7                                      |
| Nucleus                | 13C                                          |
| Acquired Size          | 32768                                        |
| Spectral Size          | 65536                                        |

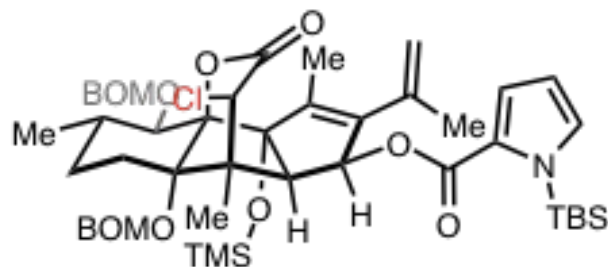

25

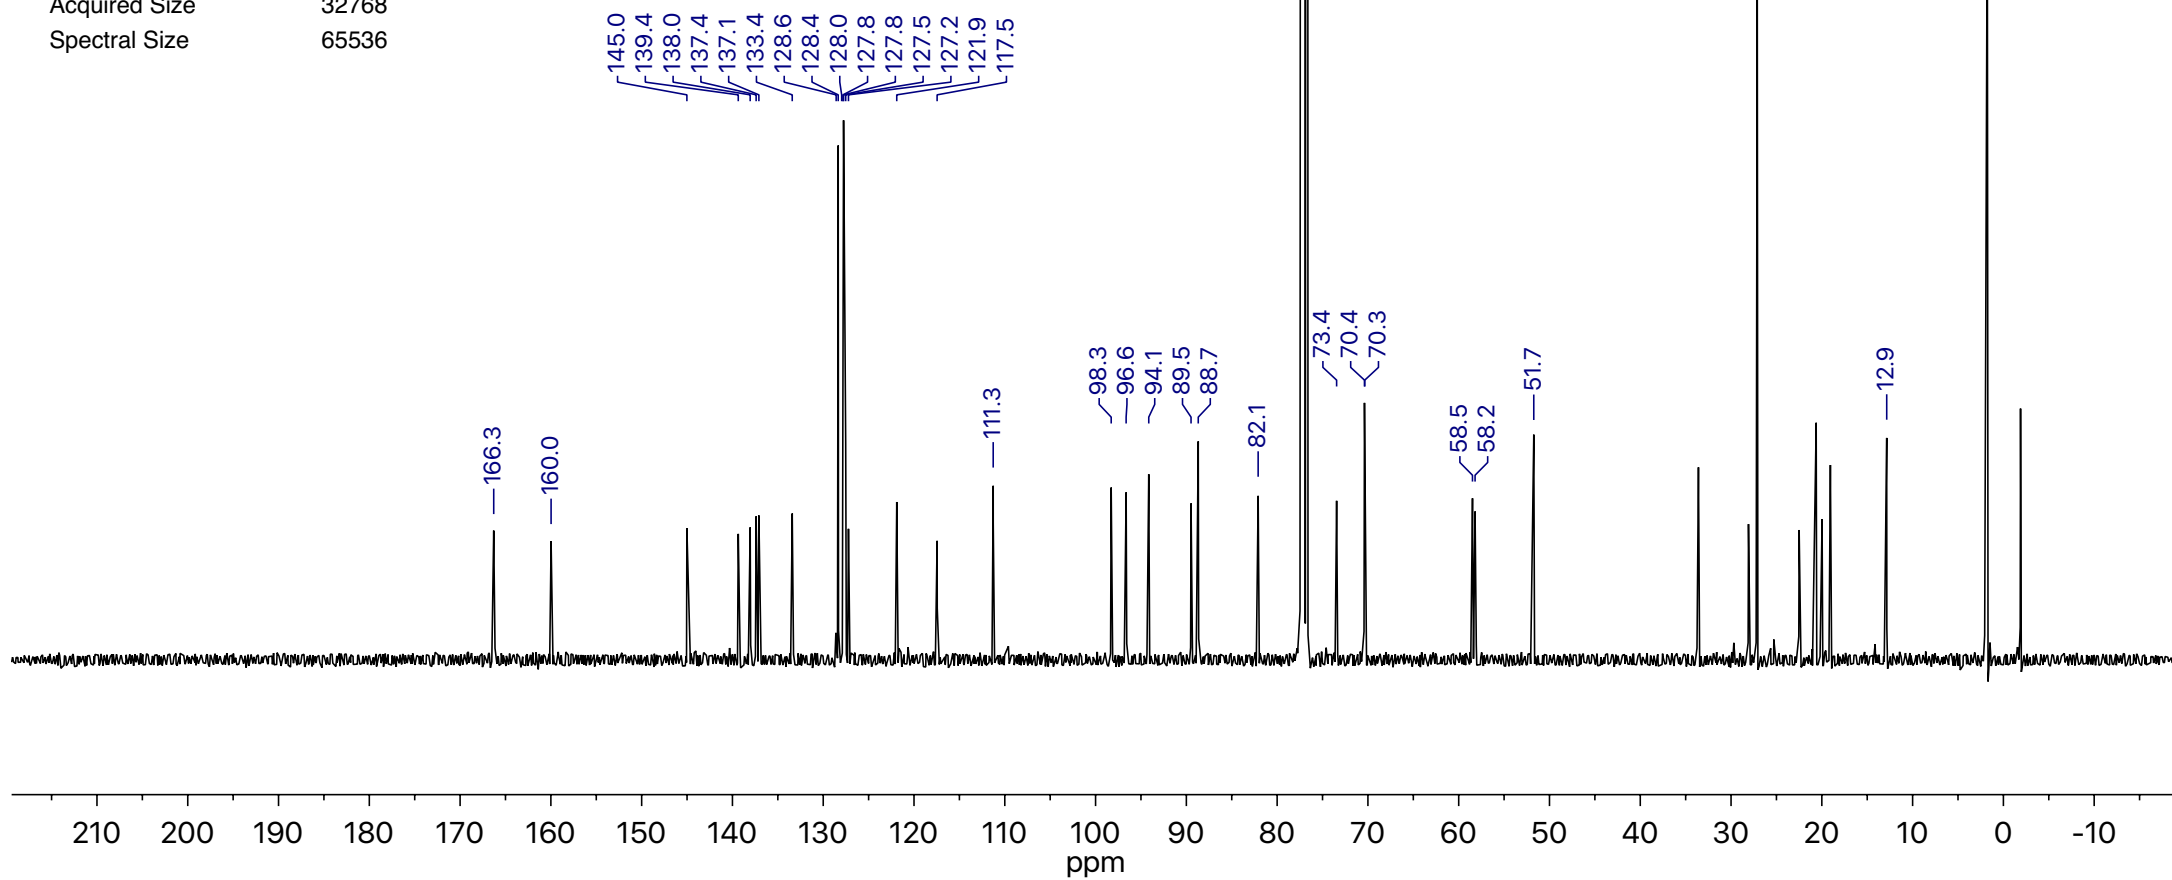



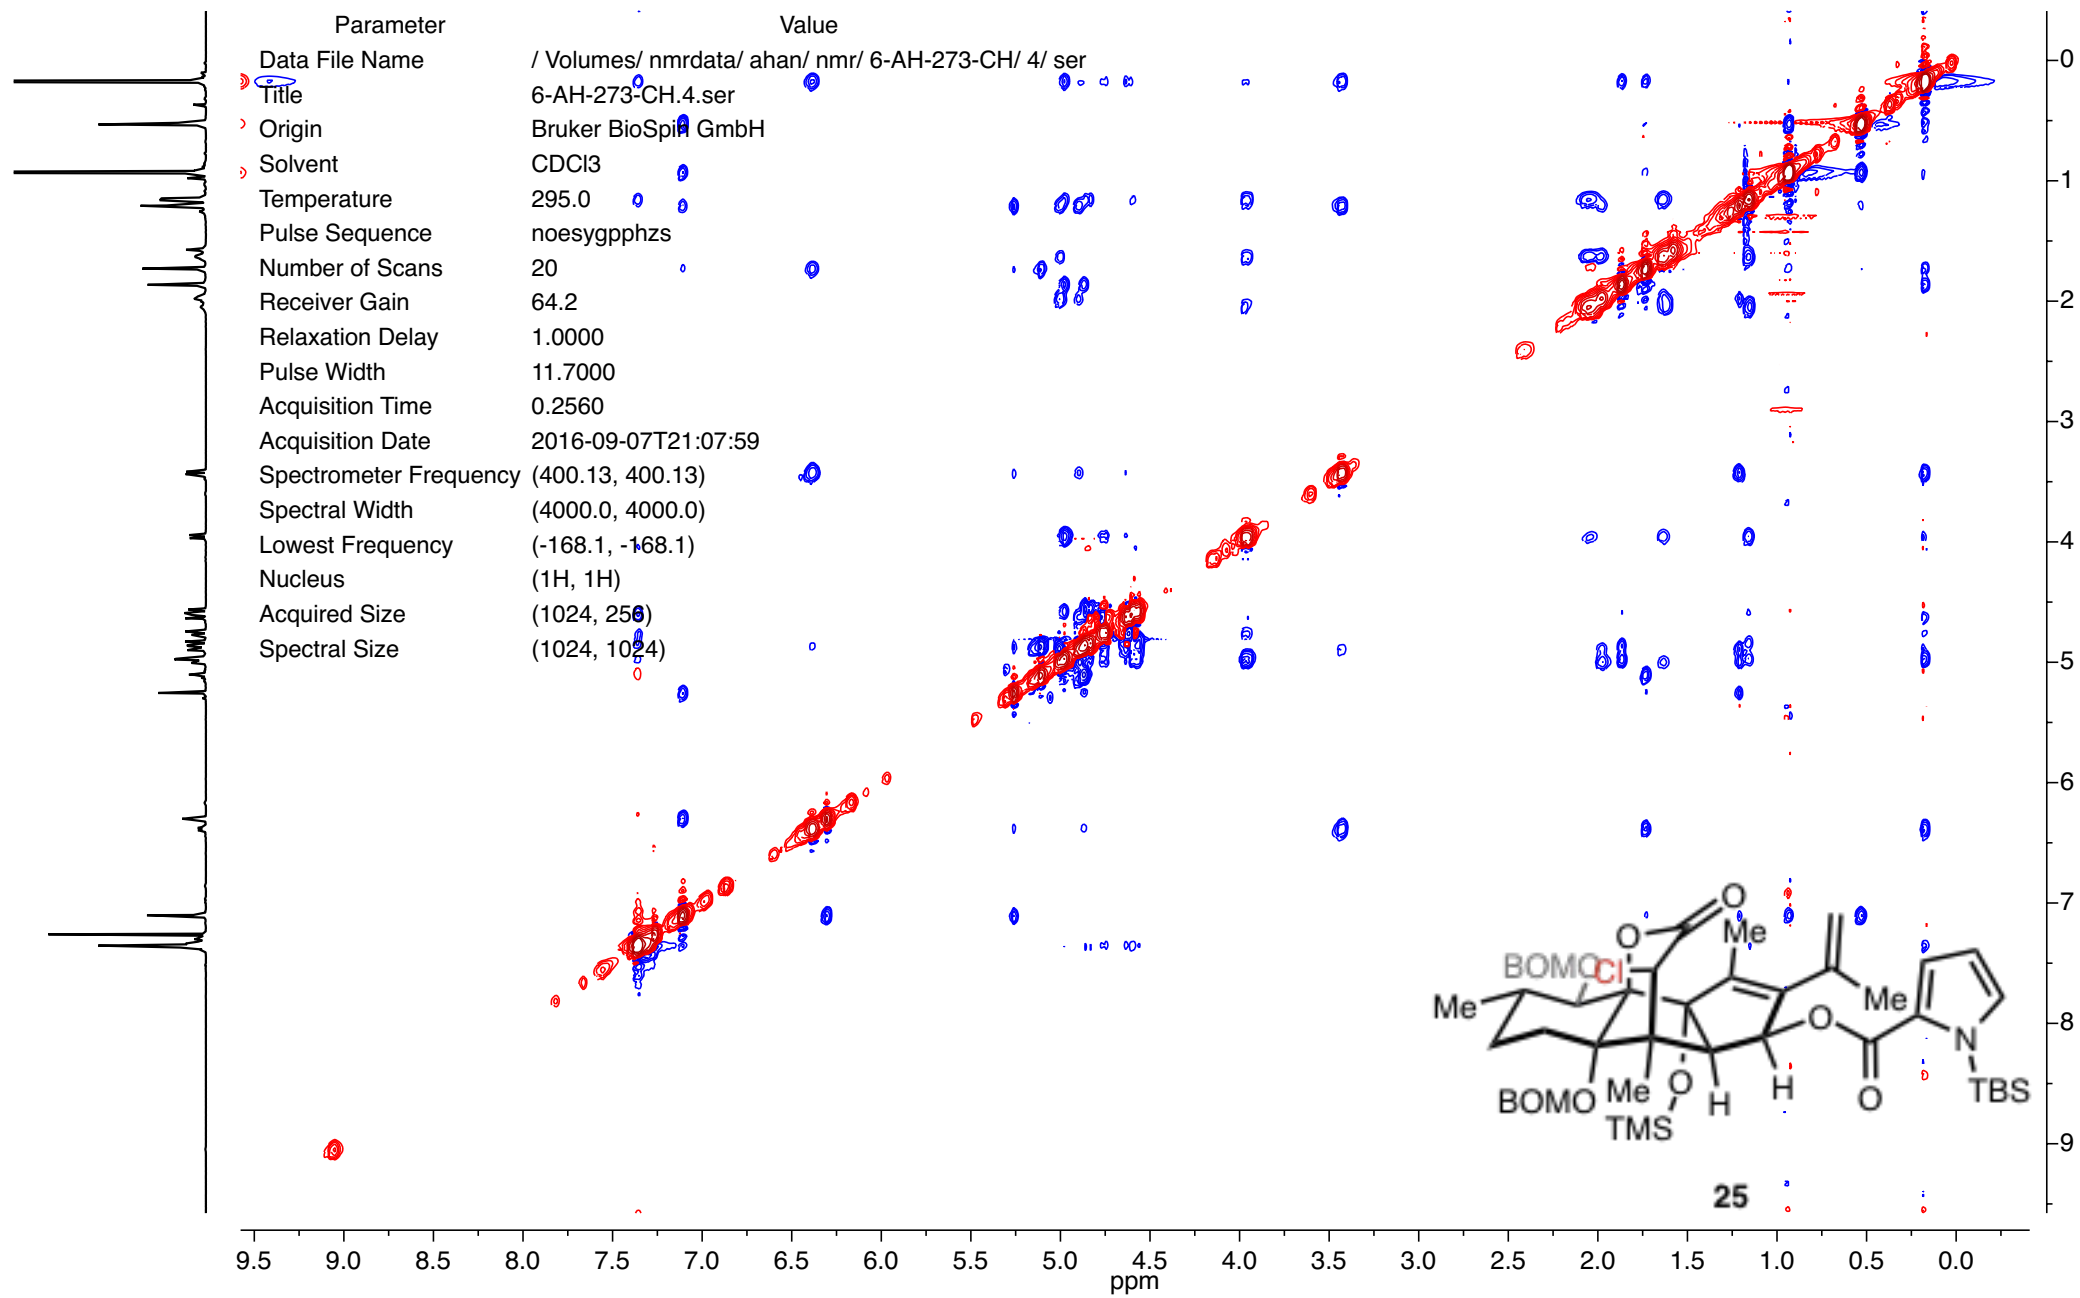

| Parameter              | Value                                       |
|------------------------|---------------------------------------------|
| Data File Name         | /Volumes/nmrdata/ahan/nmr/6-AH-250-CH/1/fid |
| Title                  | 6-AH-250-CH.1.fid                           |
| Origin                 | Bruker BioSpin GmbH                         |
| Solvent                | CDCl3                                       |
| Temperature            | 295.0                                       |
| Pulse Sequence         | zg30                                        |
| Number of Scans        | 8                                           |
| Receiver Gain          | 127.1                                       |
| Relaxation Delay       | 1.0000                                      |
| Pulse Width            | 11.7000                                     |
| Acquisition Time       | 4.0894                                      |
| Acquisition Date       | 2016-08-21T11:46:16                         |
| Spectrometer Frequency | 400.13                                      |
| Spectral Width         | 8012.8                                      |
| Lowest Frequency       | -1545.4                                     |
| Nucleus                | 1H                                          |
| Acquired Size          | 32768                                       |
| Spectral Size          | 65536                                       |

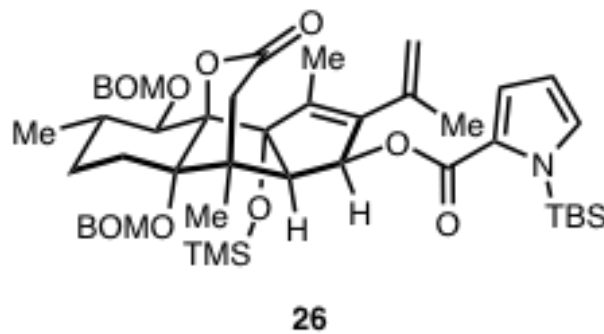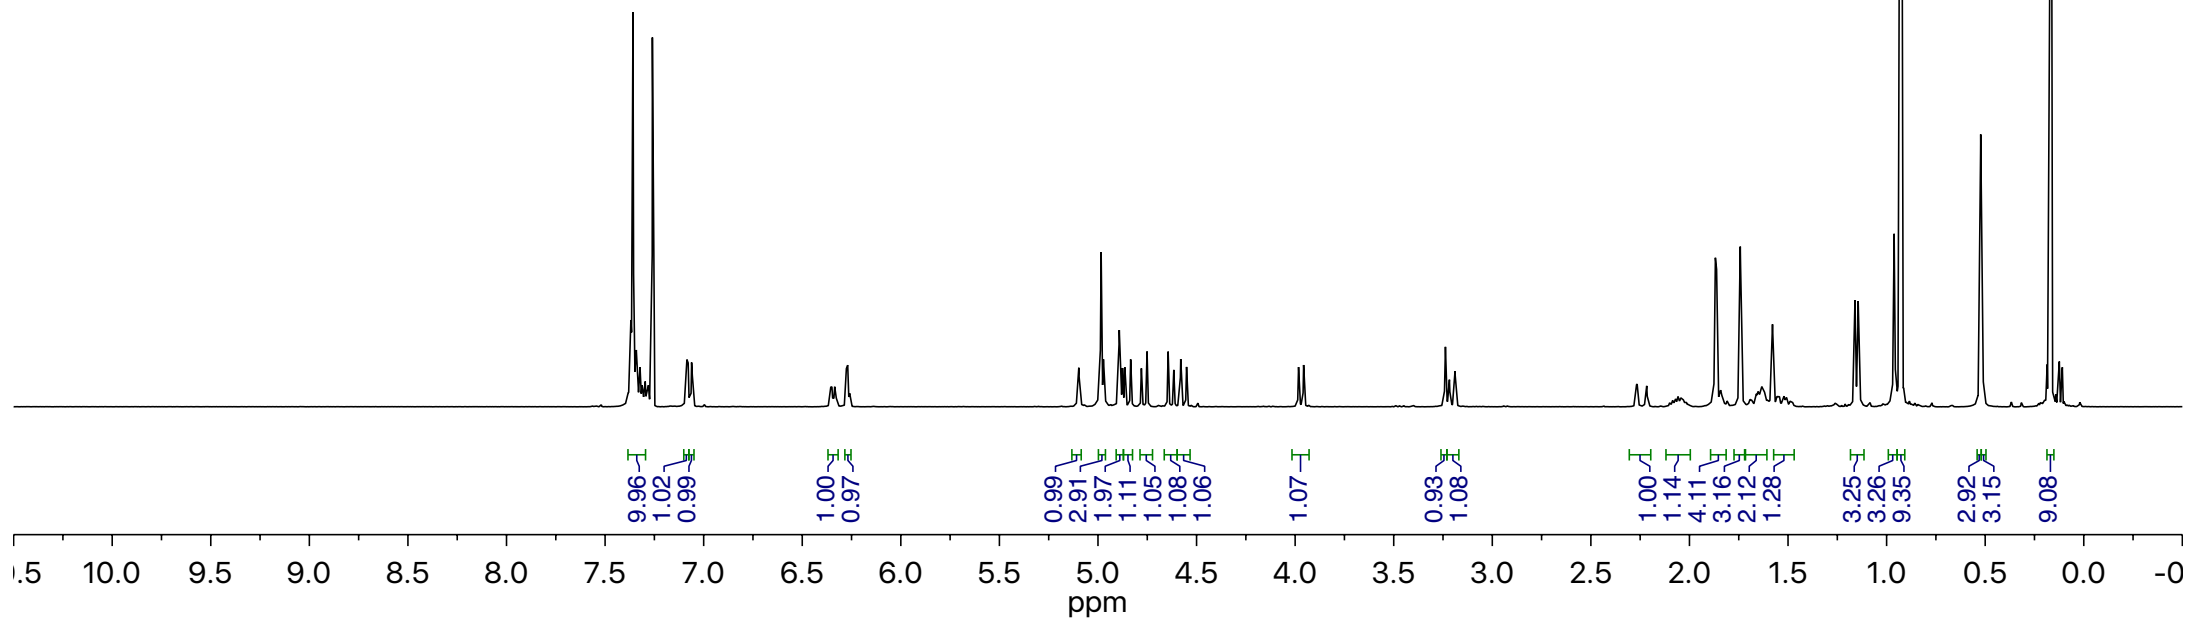

| Parameter              | Value                                       |
|------------------------|---------------------------------------------|
| Data File Name         | /Volumes/nmrdata/ahan/nmr/6-AH-250-CH/4/fid |
| Title                  | 6-AH-250-CH.4.fid                           |
| Origin                 | Bruker BioSpin GmbH                         |
| Solvent                | CDCl3                                       |
| Temperature            | 294.9                                       |
| Pulse Sequence         | zgpg30                                      |
| Number of Scans        | 1470                                        |
| Receiver Gain          | 72.0                                        |
| Relaxation Delay       | 1.0000                                      |
| Pulse Width            | 10.0000                                     |
| Acquisition Time       | 1.3631                                      |
| Acquisition Date       | 2016-08-21T13:55:55                         |
| Spectrometer Frequency | 100.62                                      |
| Spectral Width         | 24038.5                                     |
| Lowest Frequency       | -1961.8                                     |
| Nucleus                | 13C                                         |
| Acquired Size          | 32768                                       |
| Spectral Size          | 65536                                       |

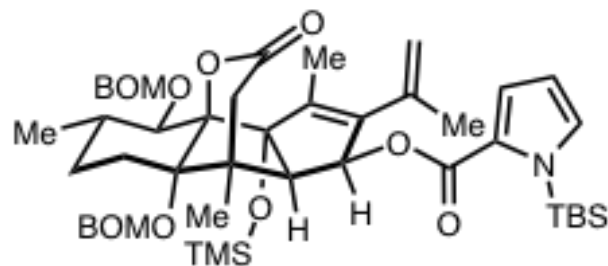

26

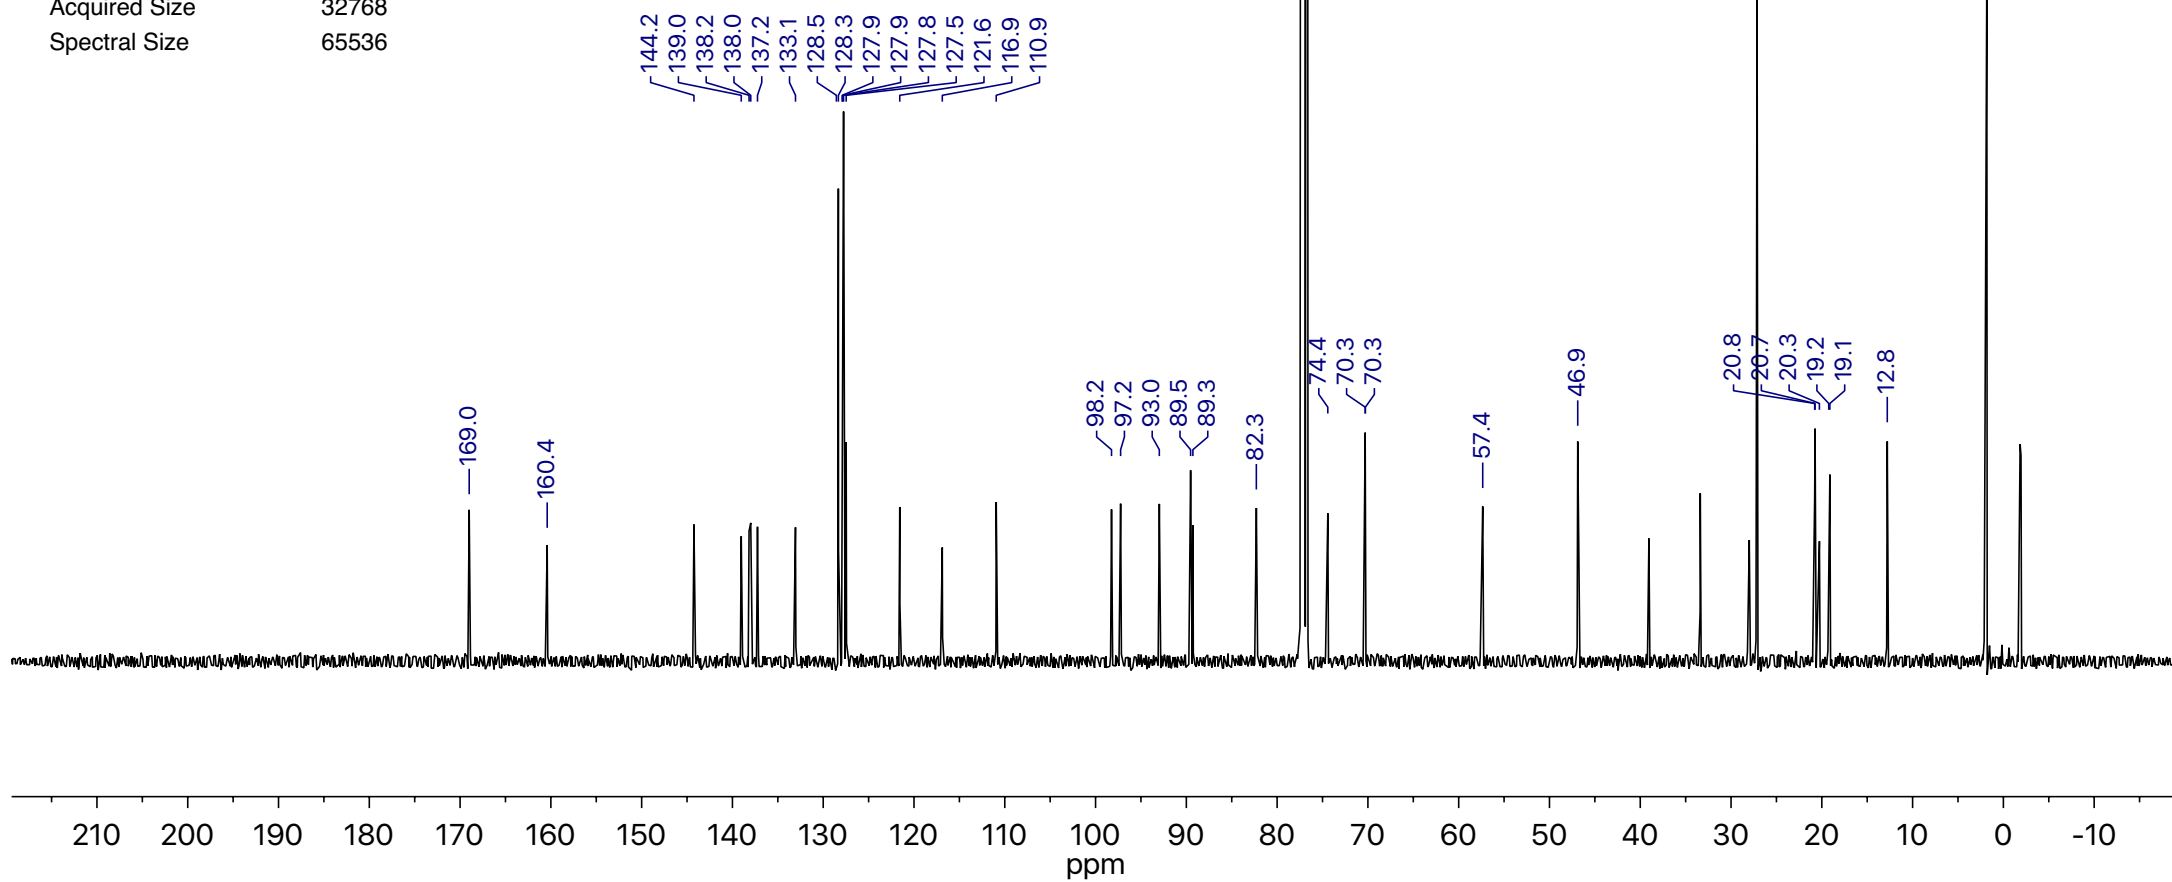

| Parameter              | Value                                           |
|------------------------|-------------------------------------------------|
| Data File Name         | /Volumes/nmrdata/chenxu91/nmr/6-AH-251-CH/1/fid |
| Title                  | 6-AH-251-CH.1.fid                               |
| Origin                 | Bruker BioSpin GmbH                             |
| Solvent                | C6D6                                            |
| Temperature            | 295.0                                           |
| Pulse Sequence         | zg30                                            |
| Number of Scans        | 8                                               |
| Receiver Gain          | 87.8                                            |
| Relaxation Delay       | 1.0000                                          |
| Pulse Width            | 11.7000                                         |
| Acquisition Time       | 4.0894                                          |
| Acquisition Date       | 2016-08-21T17:40:27                             |
| Spectrometer Frequency | 400.13                                          |
| Spectral Width         | 8012.8                                          |
| Lowest Frequency       | -1532.4                                         |
| Nucleus                | <sup>1</sup> H                                  |
| Acquired Size          | 32768                                           |
| Spectral Size          | 65536                                           |

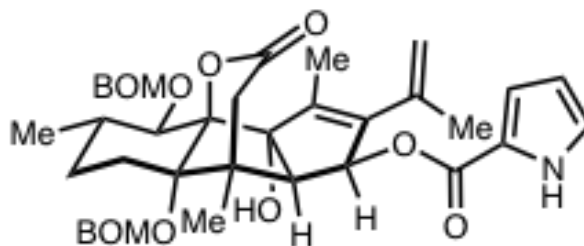

S14

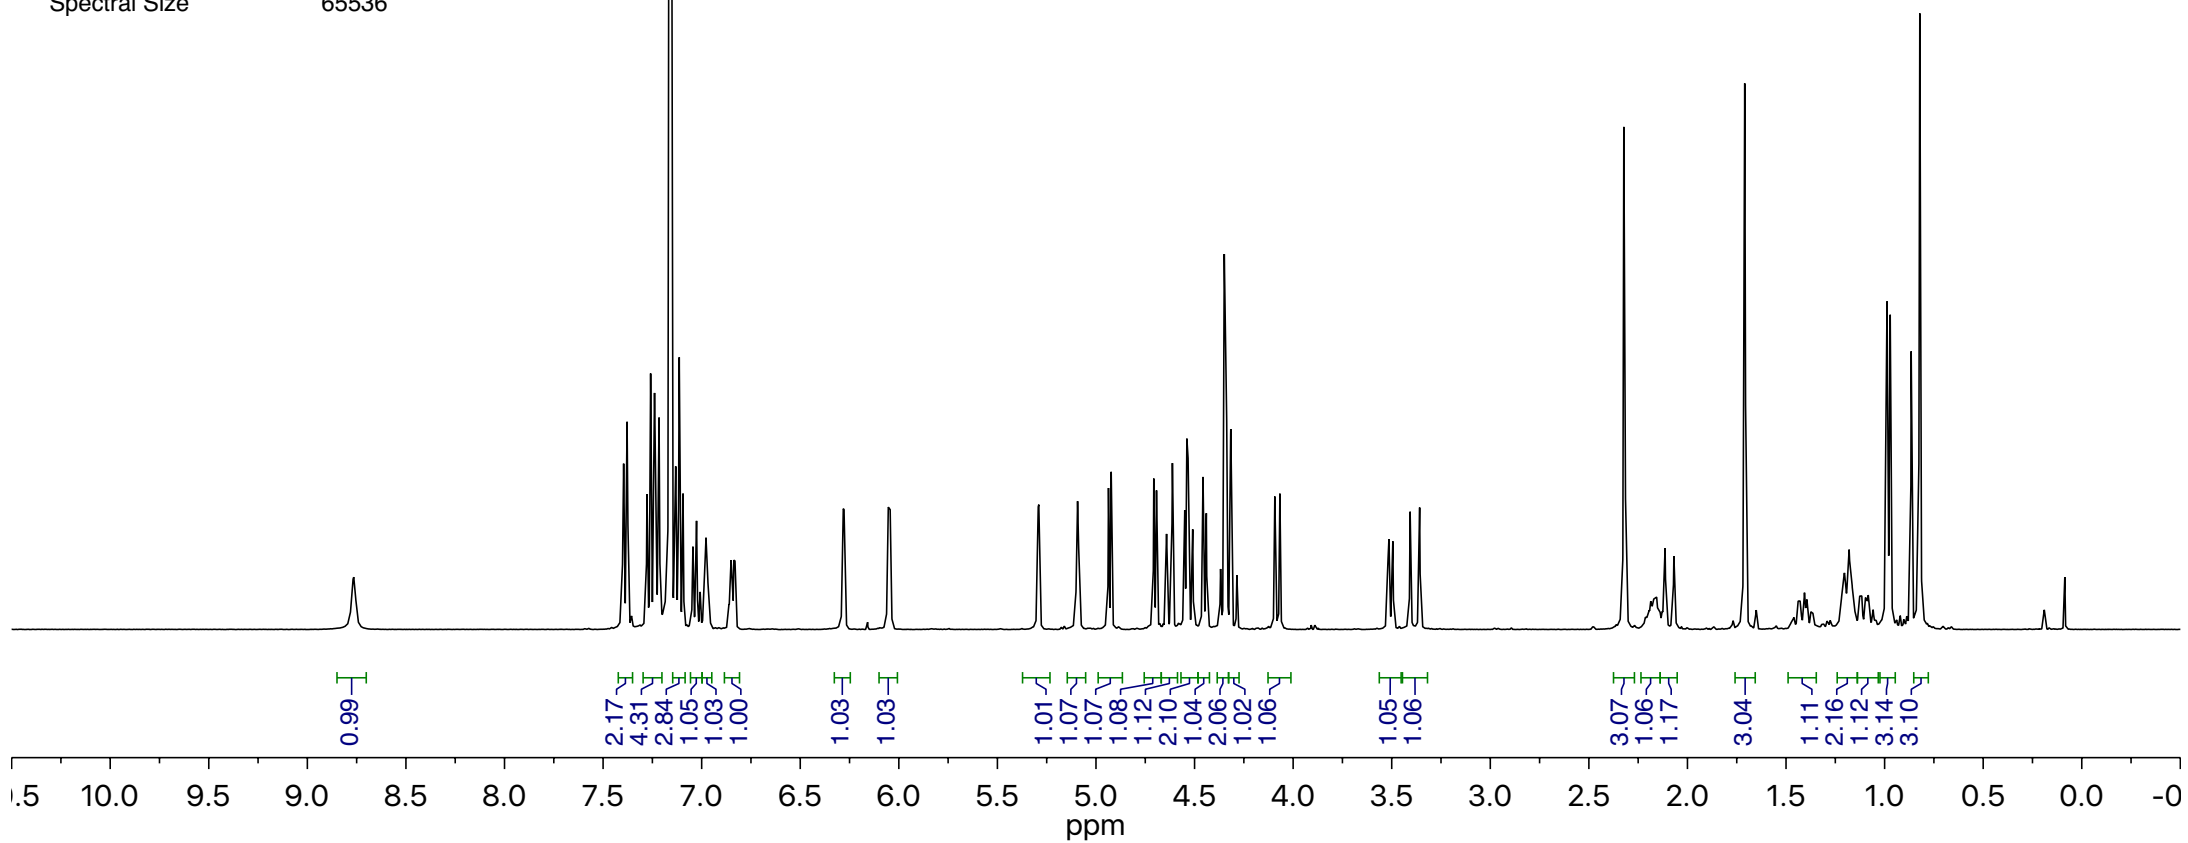

| Parameter              | Value                                           |
|------------------------|-------------------------------------------------|
| Data File Name         | /Volumes/nmrdata/chenxu91/nmr/6-AH-251-CH/4/fid |
| Title                  | 6-AH-251-CH.4.fid                               |
| Origin                 | Bruker BioSpin GmbH                             |
| Solvent                | C6D6                                            |
| Temperature            | 294.9                                           |
| Pulse Sequence         | zgpg30                                          |
| Number of Scans        | 1470                                            |
| Receiver Gain          | 72.0                                            |
| Relaxation Delay       | 1.0000                                          |
| Pulse Width            | 10.0000                                         |
| Acquisition Time       | 1.3631                                          |
| Acquisition Date       | 2016-08-21T19:43:05                             |
| Spectrometer Frequency | 100.62                                          |
| Spectral Width         | 24038.5                                         |
| Lowest Frequency       | -1927.6                                         |
| Nucleus                | <sup>13</sup> C                                 |
| Acquired Size          | 32768                                           |
| Spectral Size          | 65536                                           |

128.8  
128.7  
128.4  
128.1  
123.8  
122.6  
117.1  
116.0  
110.7

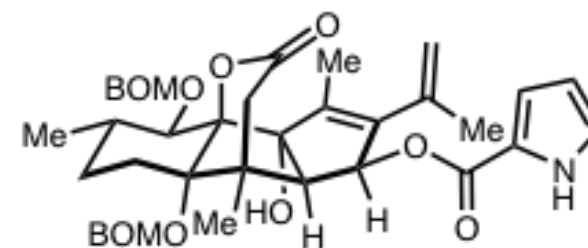

S14

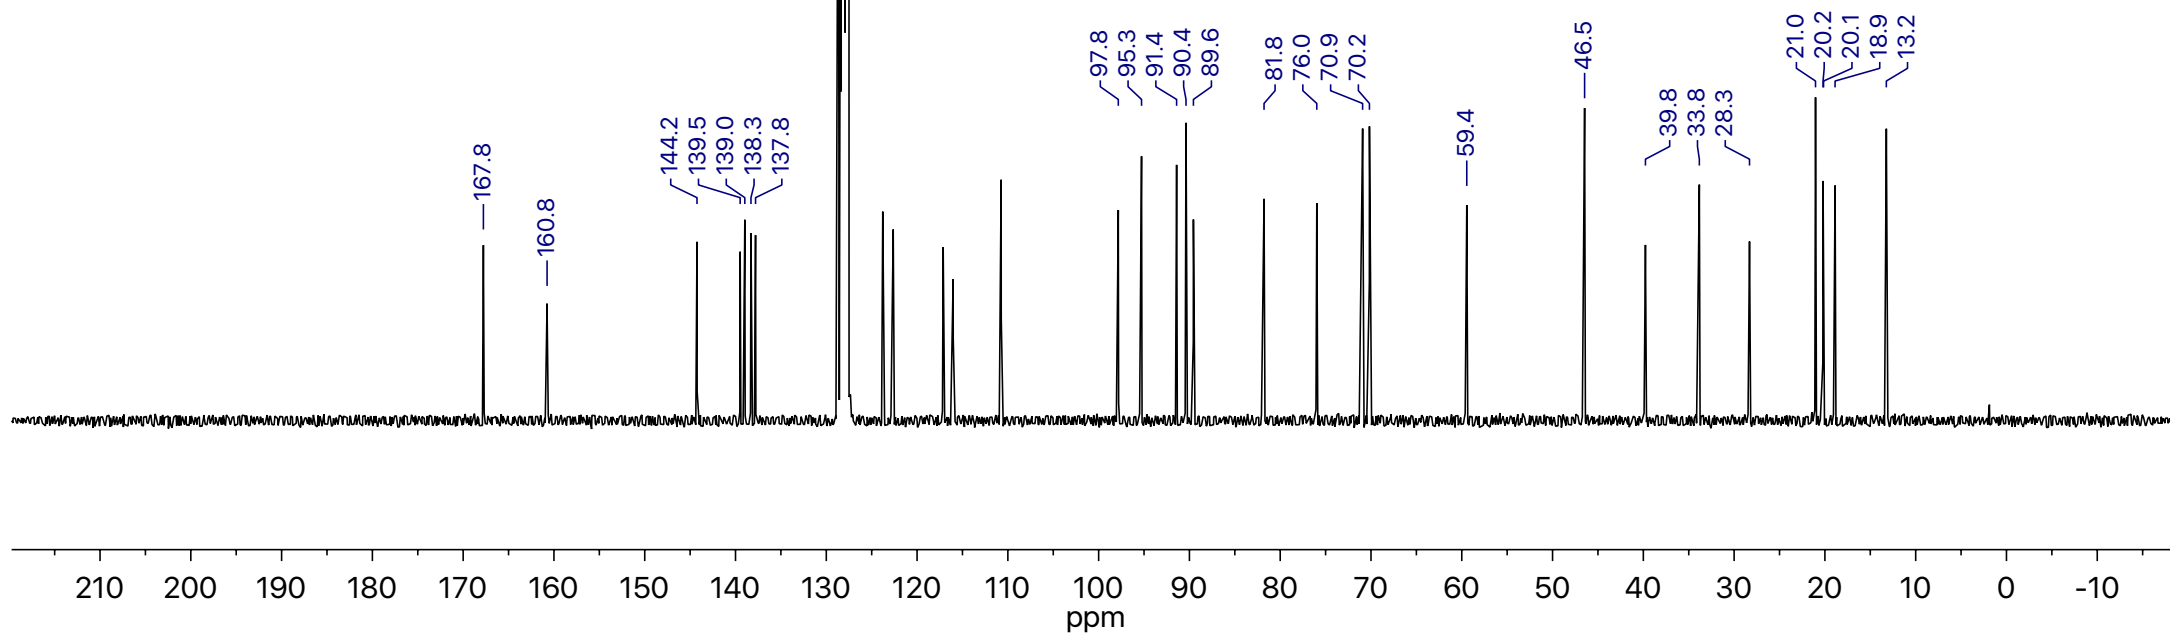

| Parameter              | Value                                       |
|------------------------|---------------------------------------------|
| Data File Name         | /Volumes/nmrdata/ahan/nmr/6-AH-252-CH/1/fid |
| Title                  | 6-AH-252-CH.1.fid                           |
| Origin                 | Bruker BioSpin GmbH                         |
| Solvent                | C6D6                                        |
| Temperature            | 294.9                                       |
| Pulse Sequence         | zg30                                        |
| Number of Scans        | 8                                           |
| Receiver Gain          | 78.7                                        |
| Relaxation Delay       | 1.0000                                      |
| Pulse Width            | 11.7000                                     |
| Acquisition Time       | 4.0894                                      |
| Acquisition Date       | 2016-08-22T08:05:18                         |
| Spectrometer Frequency | 400.13                                      |
| Spectral Width         | 8012.8                                      |
| Lowest Frequency       | -1532.5                                     |
| Nucleus                | 1H                                          |
| Acquired Size          | 32768                                       |
| Spectral Size          | 65536                                       |

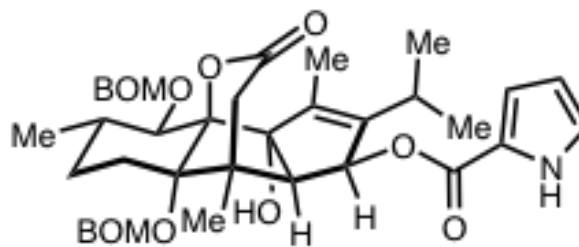

S15

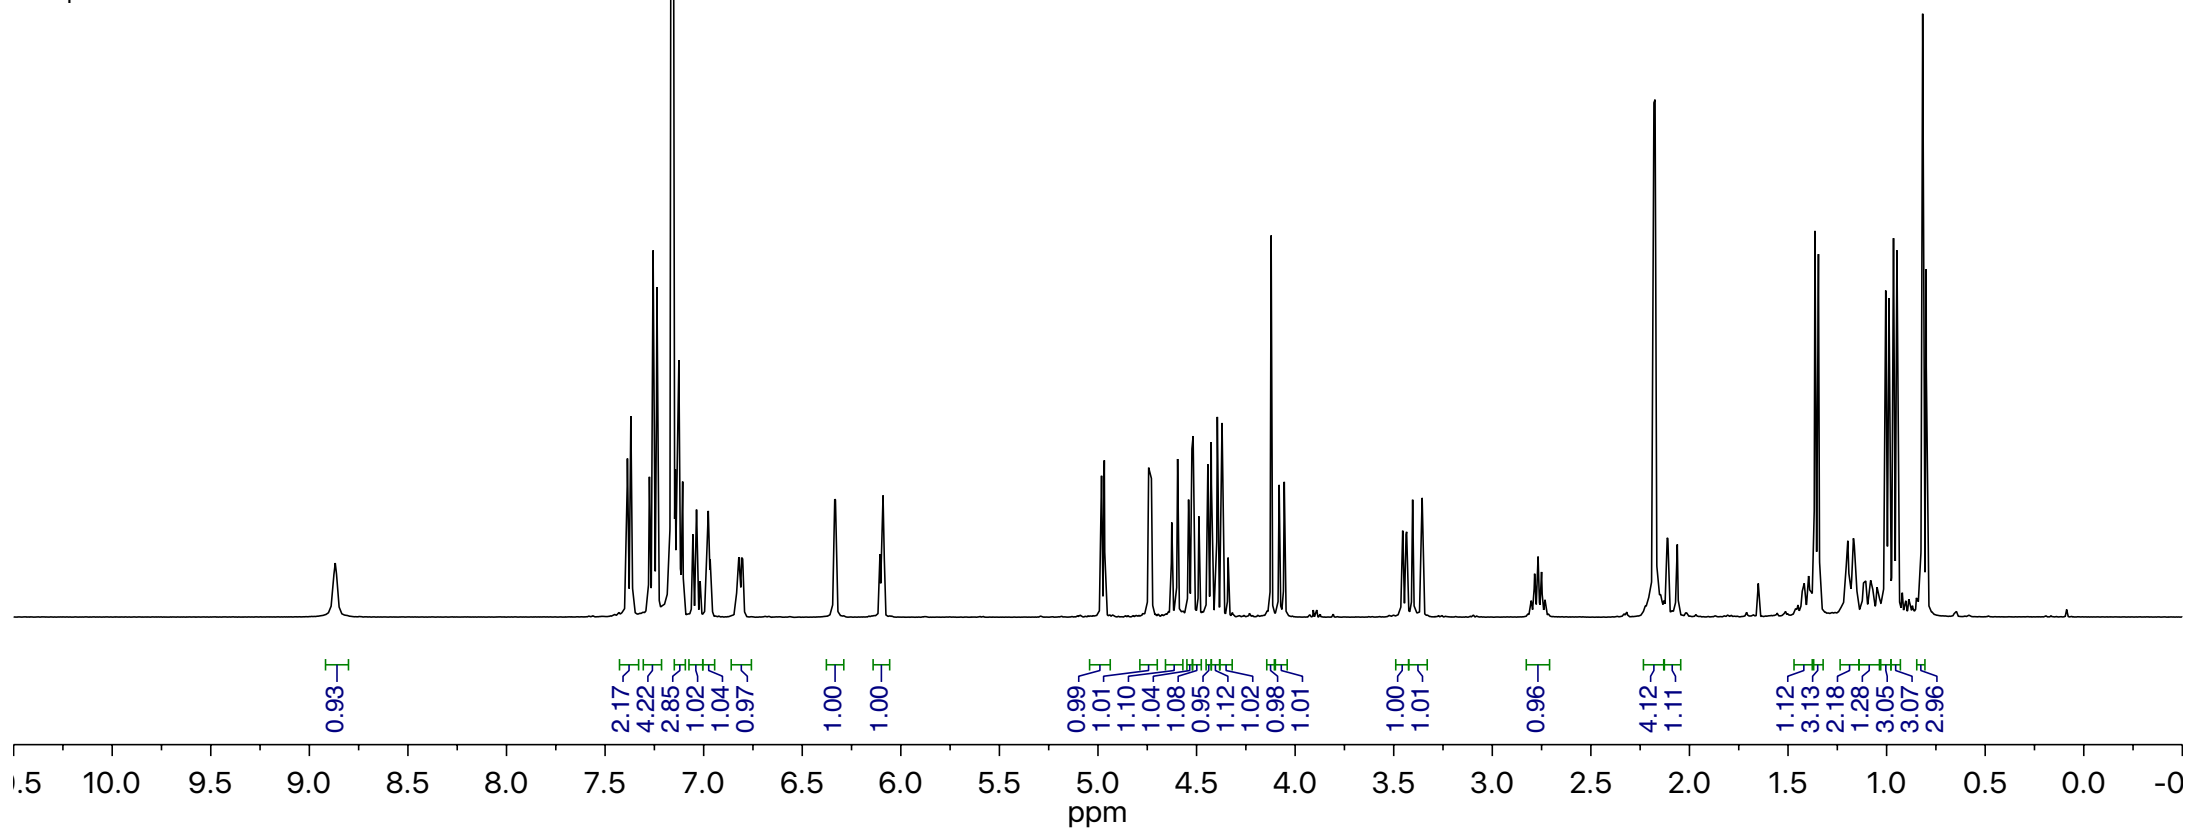

| Parameter              | Value                                       |
|------------------------|---------------------------------------------|
| Data File Name         | /Volumes/nmrdata/ahan/nmr/6-AH-252-CH/4/fid |
| Title                  | 6-AH-252-CH.4.fid                           |
| Origin                 | Bruker BioSpin GmbH                         |
| Solvent                | C6D6                                        |
| Temperature            | 295.0                                       |
| Pulse Sequence         | zgpg30                                      |
| Number of Scans        | 1475                                        |
| Receiver Gain          | 72.0                                        |
| Relaxation Delay       | 1.0000                                      |
| Pulse Width            | 10.0000                                     |
| Acquisition Time       | 1.3631                                      |
| Acquisition Date       | 2016-08-22T10:08:05                         |
| Spectrometer Frequency | 100.62                                      |
| Spectral Width         | 24038.5                                     |
| Lowest Frequency       | -1927.5                                     |
| Nucleus                | <sup>13</sup> C                             |
| Acquired Size          | 32768                                       |
| Spectral Size          | 65536                                       |

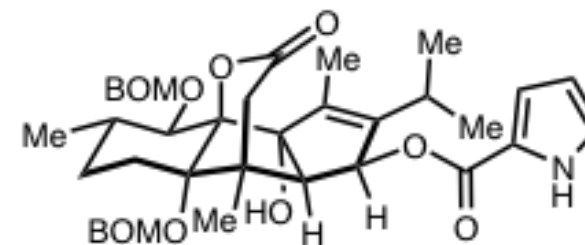

S15

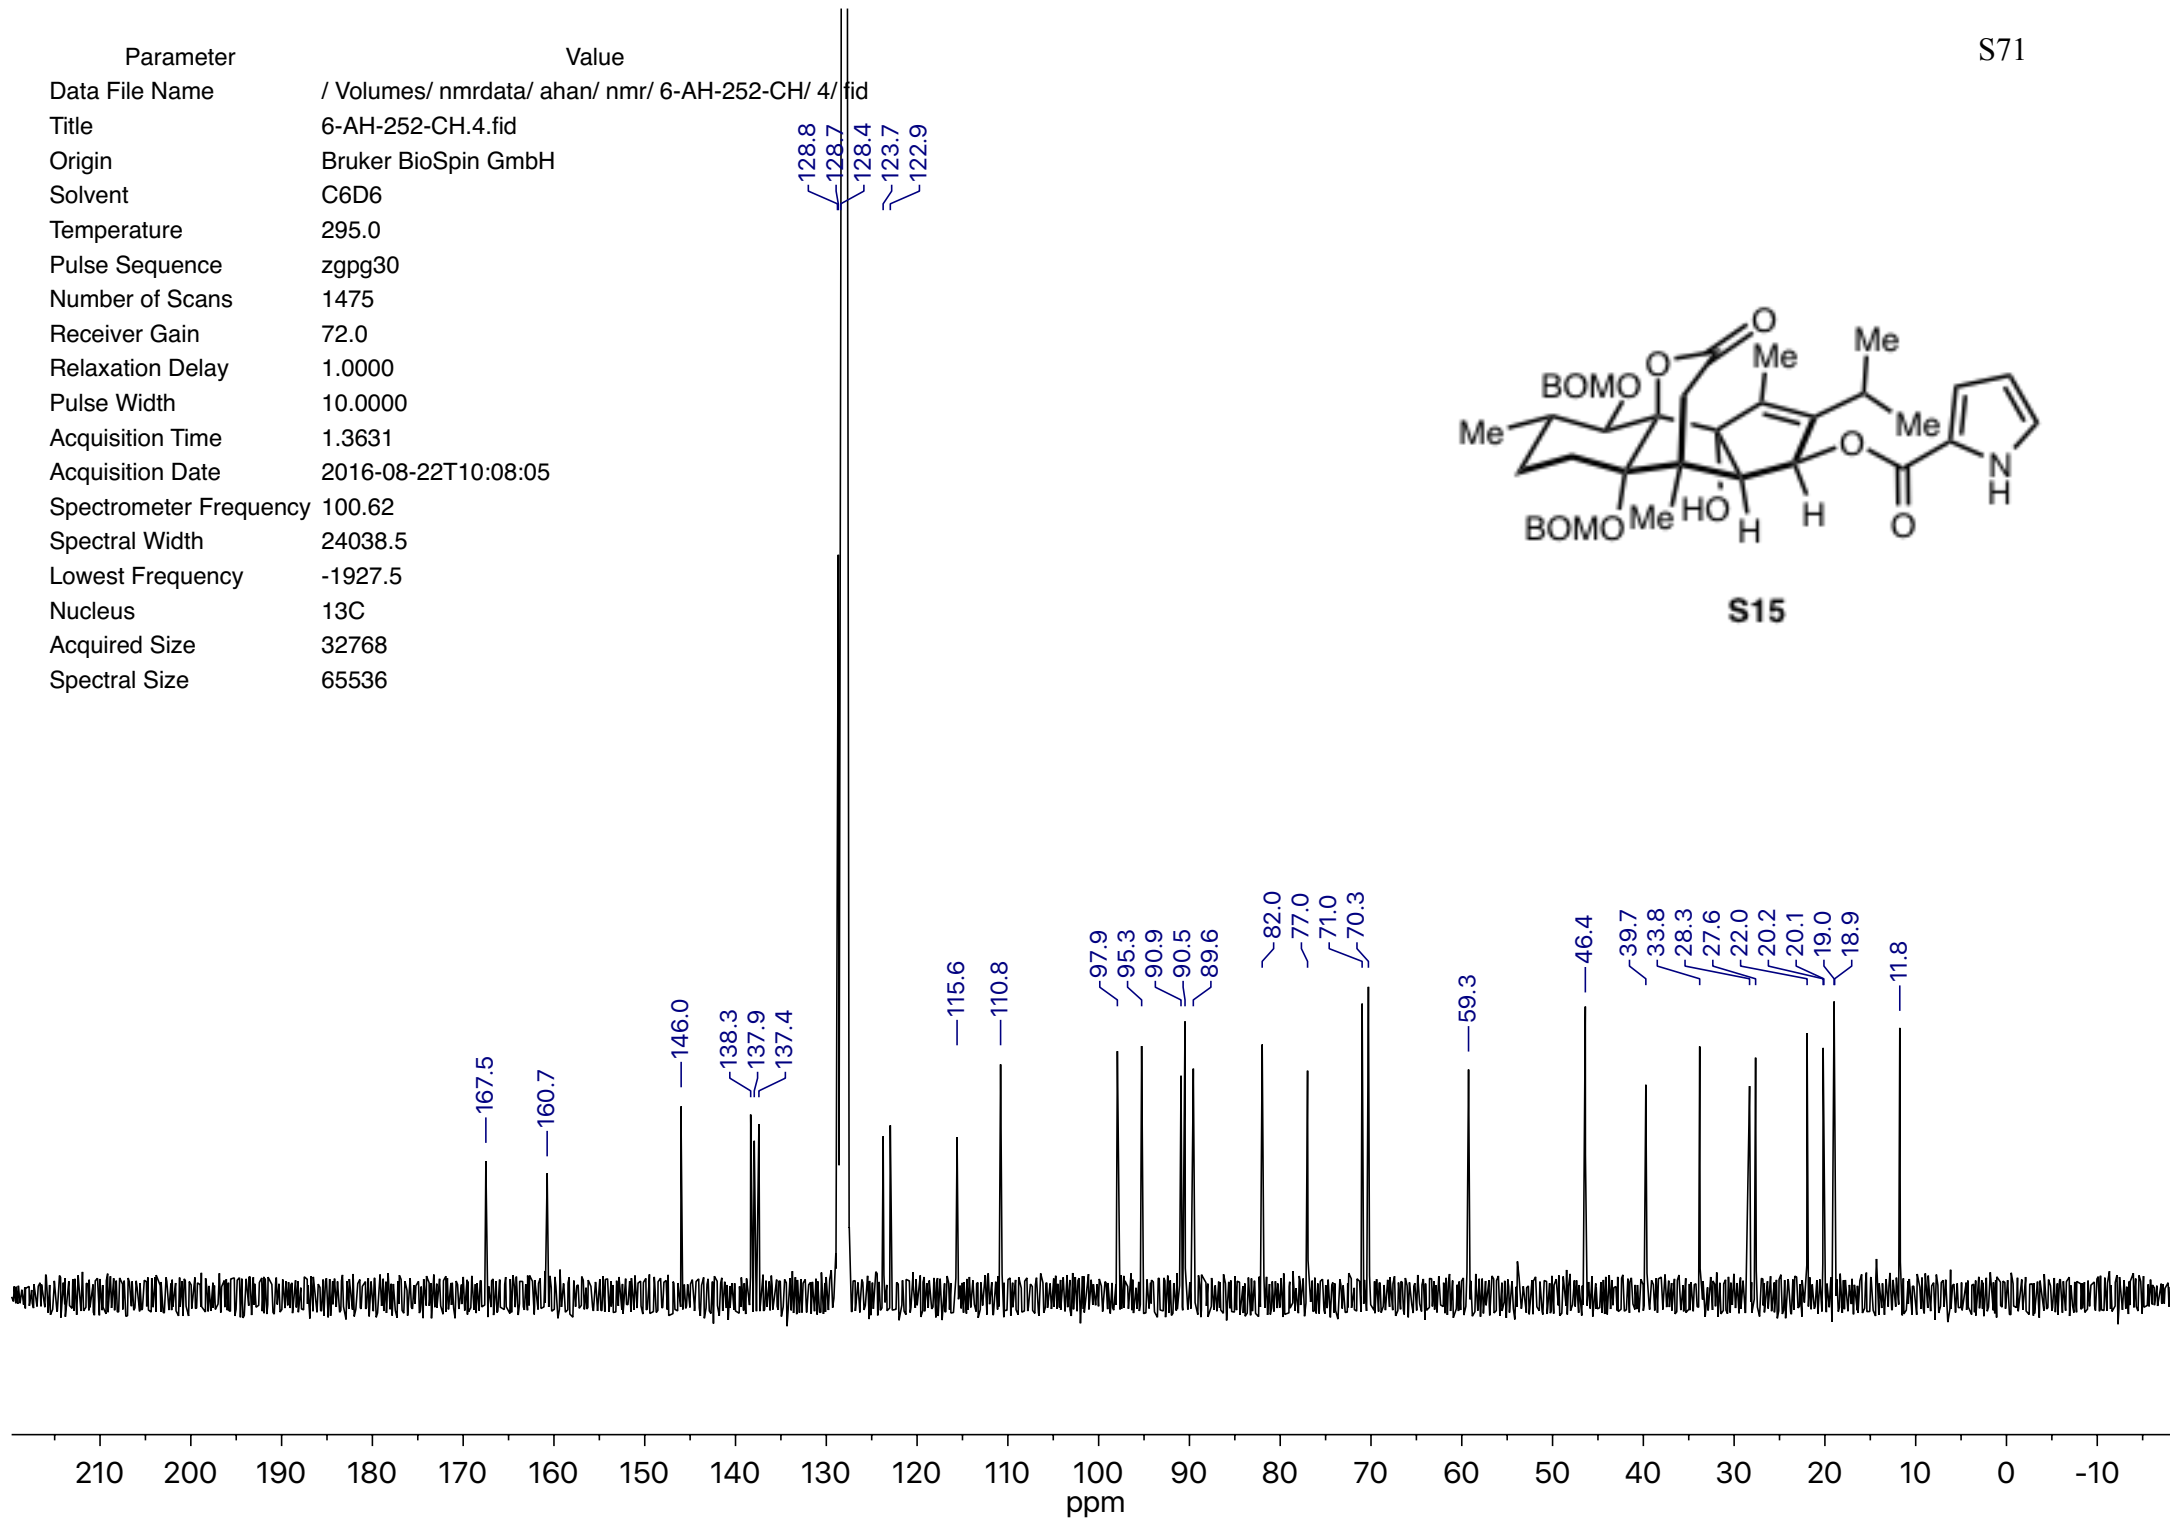

| Parameter              | Value                                           |
|------------------------|-------------------------------------------------|
| Data File Name         | /Volumes/nmrdata/chenxu91/nmr/6-AH-253-CH/1/fid |
| Title                  | 6-AH-253-CH.1.fid                               |
| Origin                 | Bruker BioSpin GmbH                             |
| Solvent                | C6D6                                            |
| Temperature            | 295.0                                           |
| Pulse Sequence         | zg30                                            |
| Number of Scans        | 8                                               |
| Receiver Gain          | 72.0                                            |
| Relaxation Delay       | 1.0000                                          |
| Pulse Width            | 11.7000                                         |
| Acquisition Time       | 4.0894                                          |
| Acquisition Date       | 2016-08-22T15:50:51                             |
| Spectrometer Frequency | 400.13                                          |
| Spectral Width         | 8012.8                                          |
| Lowest Frequency       | -1532.4                                         |
| Nucleus                | 1H                                              |
| Acquired Size          | 32768                                           |
| Spectral Size          | 65536                                           |

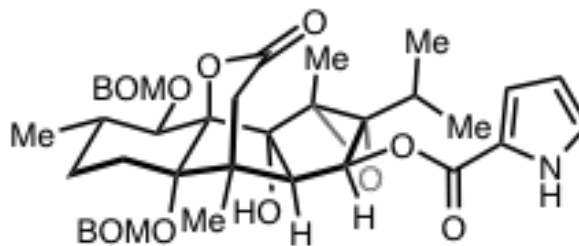

27

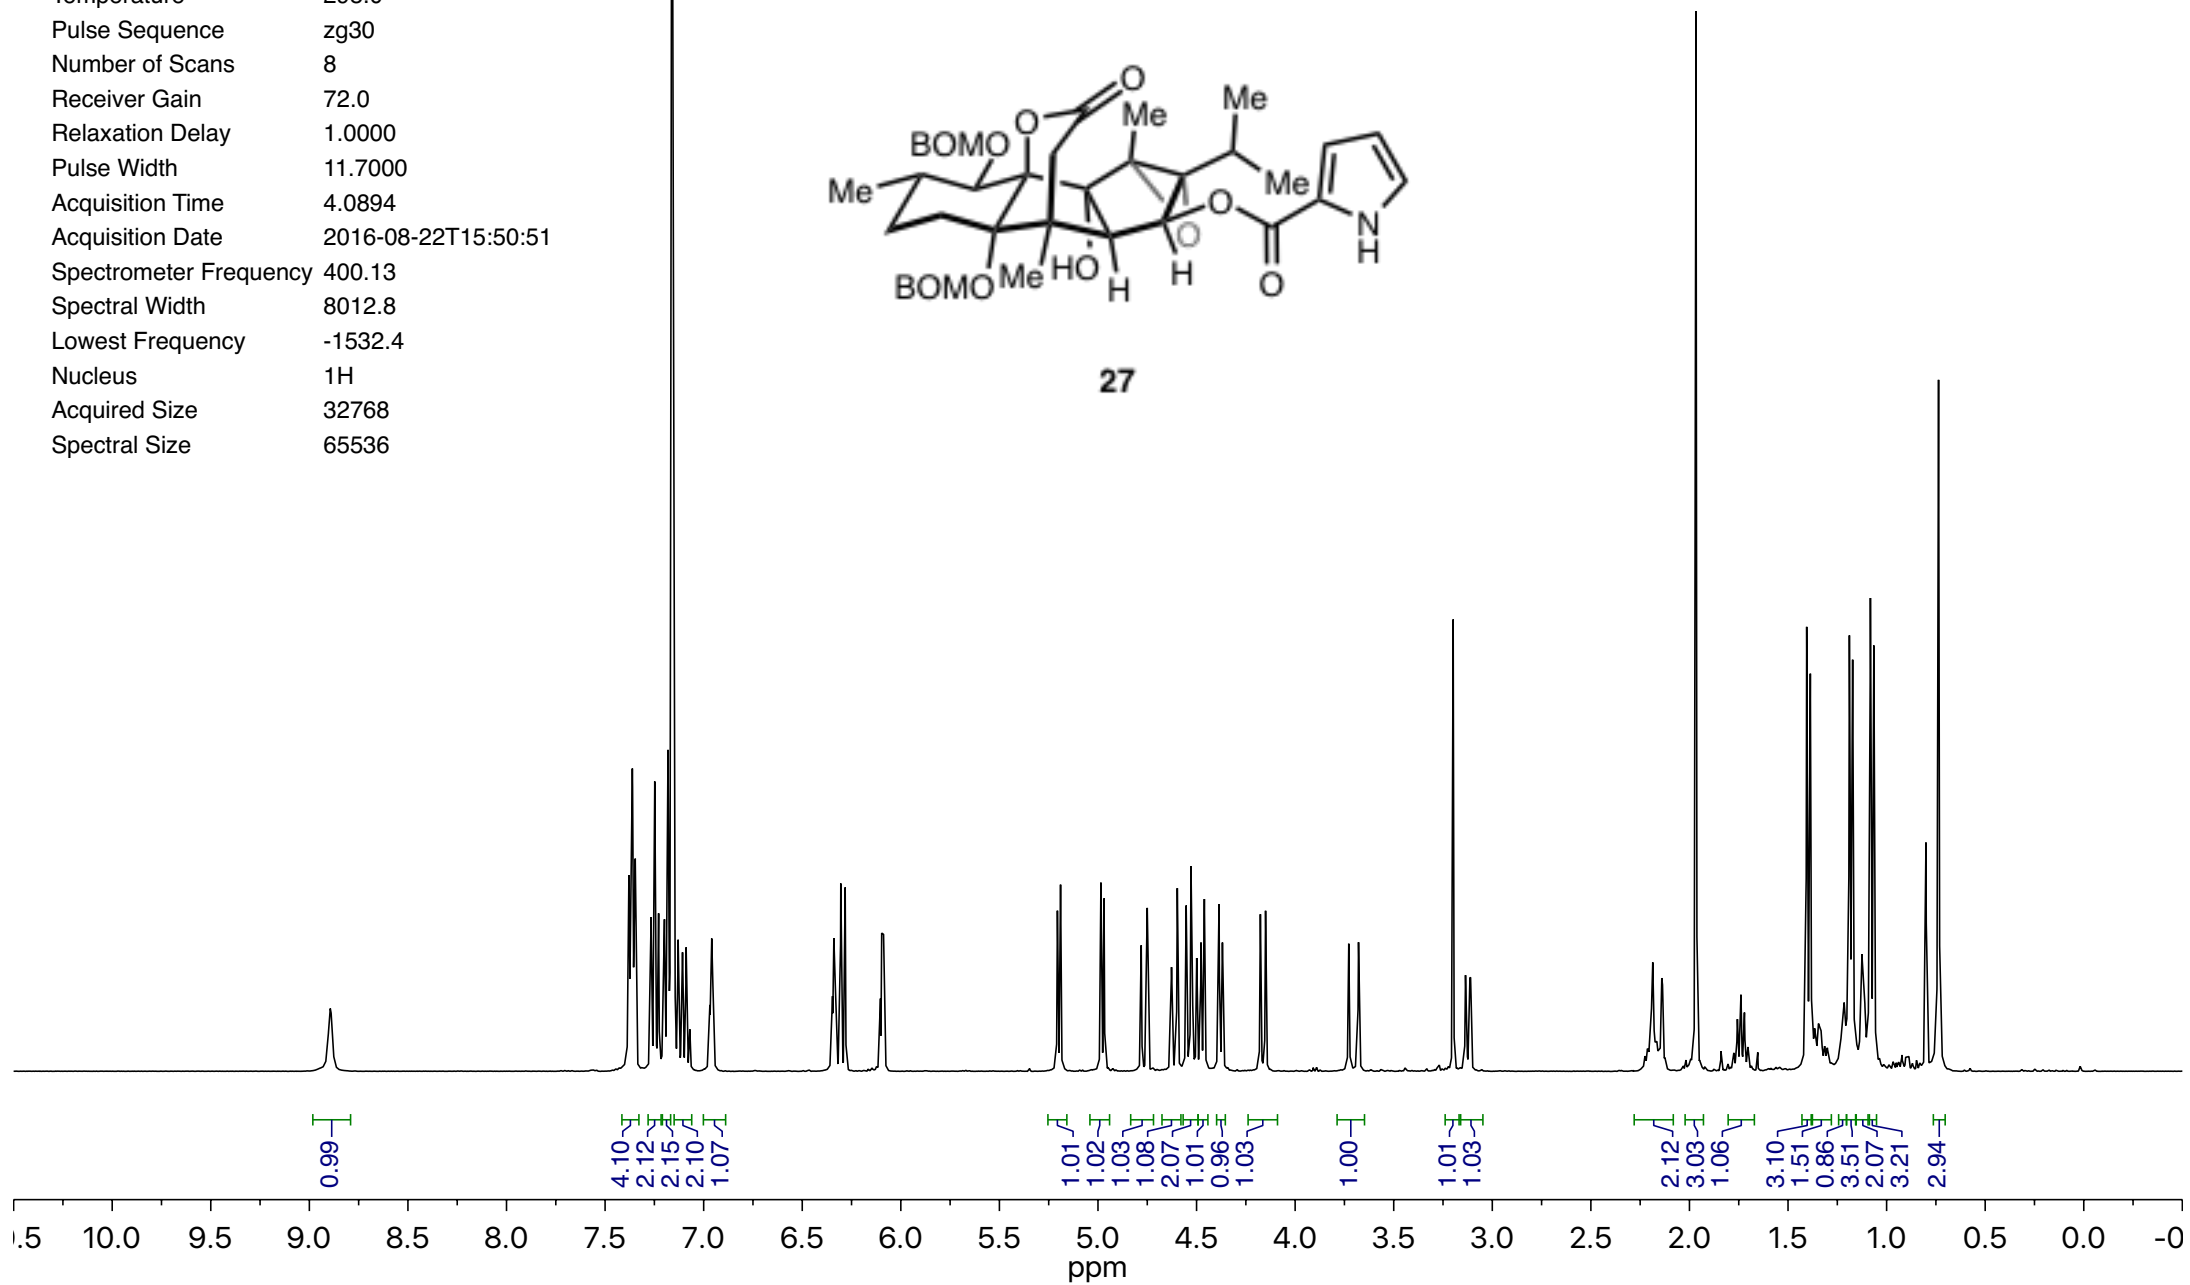



| Parameter              | Value                                           |
|------------------------|-------------------------------------------------|
| Data File Name         | /Volumes/nmrdata/chenxu91/nmr/6-AH-253-CH/4/fid |
| Title                  | 6-AH-253-CH.4.fid                               |
| Origin                 | Bruker BioSpin GmbH                             |
| Solvent                | C6D6                                            |
| Temperature            | 294.9                                           |
| Pulse Sequence         | zgpg30                                          |
| Number of Scans        | 1480                                            |
| Receiver Gain          | 72.0                                            |
| Relaxation Delay       | 1.0000                                          |
| Pulse Width            | 10.0000                                         |
| Acquisition Time       | 1.3631                                          |
| Acquisition Date       | 2016-08-22T17:59:55                             |
| Spectrometer Frequency | 100.62                                          |
| Spectral Width         | 24038.5                                         |
| Lowest Frequency       | -1927.7                                         |
| Nucleus                | <sup>13</sup> C                                 |
| Acquired Size          | 32768                                           |
| Spectral Size          | 65536                                           |

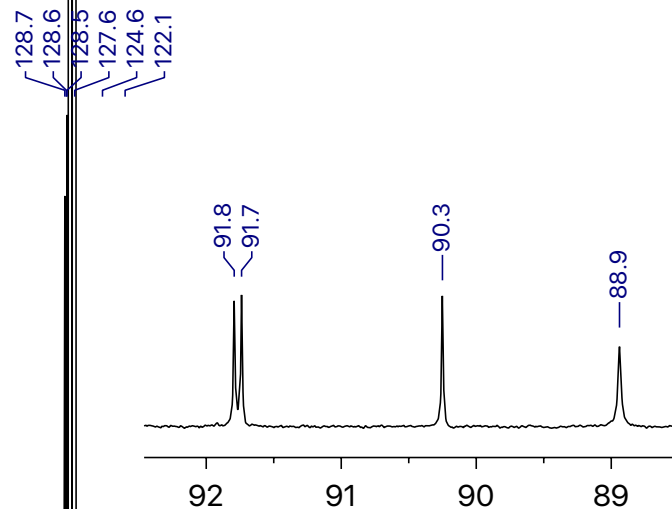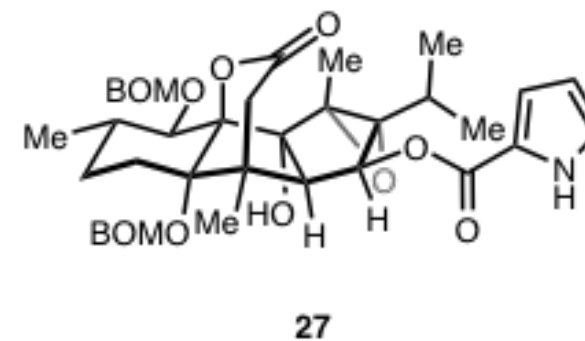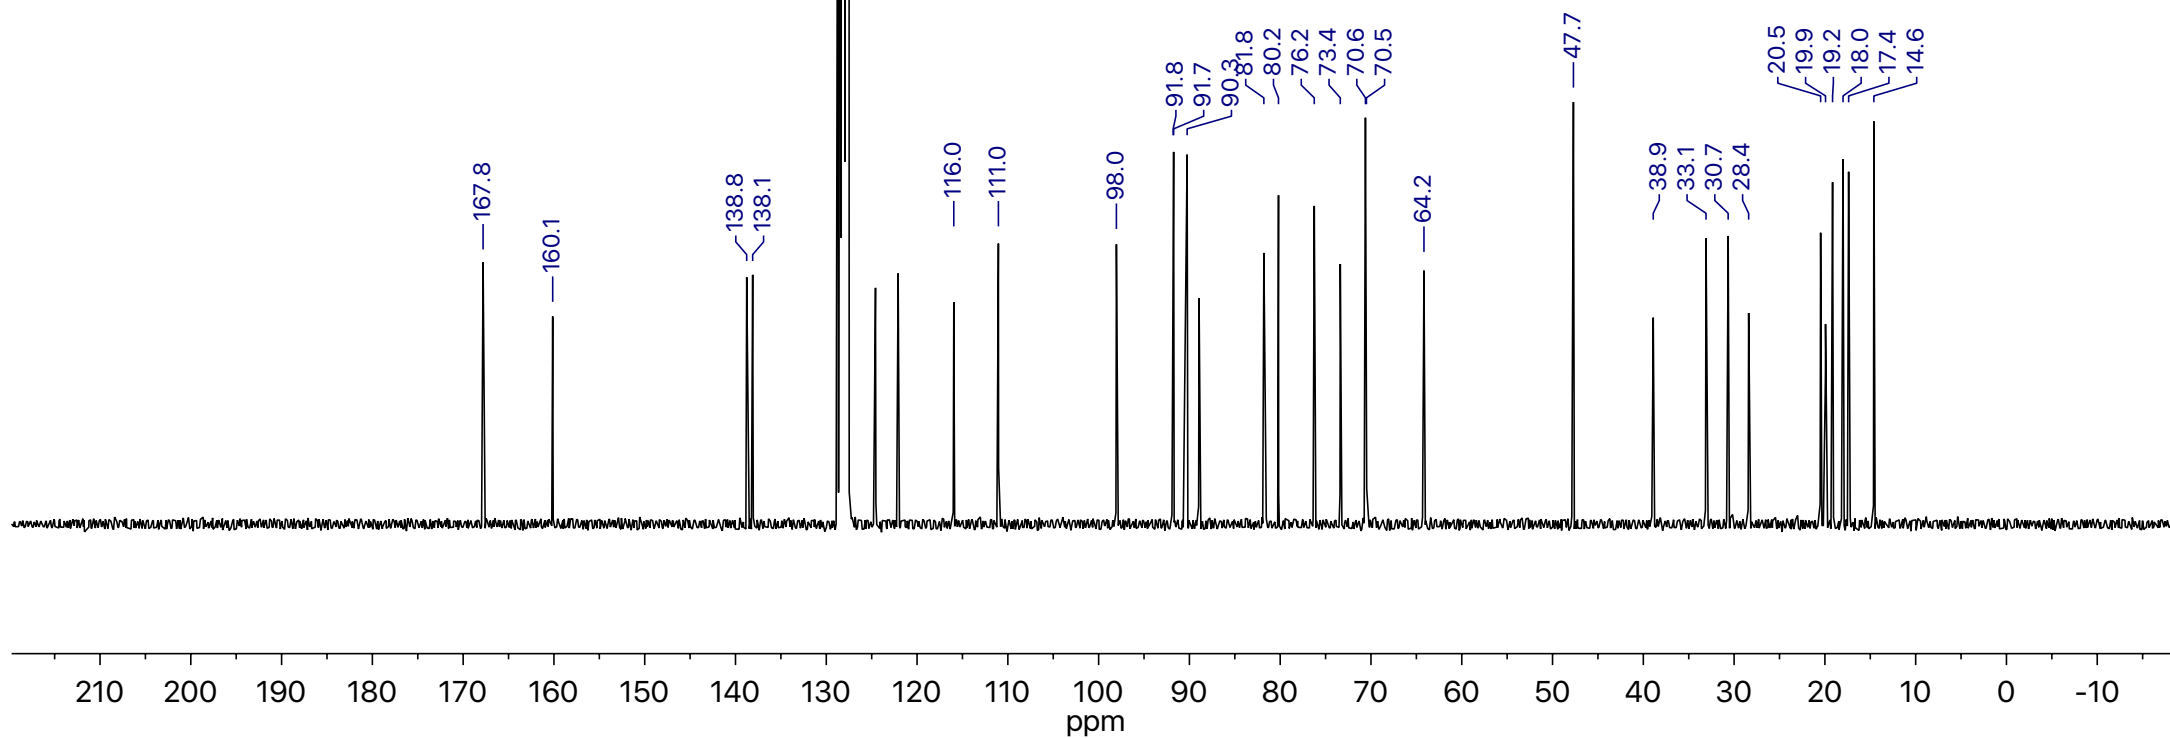

| Parameter              | Value                                       |
|------------------------|---------------------------------------------|
| Data File Name         | /Volumes/nmrdata/ahan/nmr/6-AH-254-CH/1/fid |
| Title                  | 6-AH-254-CH.1.fid                           |
| Origin                 | Bruker BioSpin GmbH                         |
| Solvent                | MeOD                                        |
| Temperature            | 294.9                                       |
| Pulse Sequence         | zg30                                        |
| Number of Scans        | 8                                           |
| Receiver Gain          | 176.8                                       |
| Relaxation Delay       | 1.0000                                      |
| Pulse Width            | 11.7000                                     |
| Acquisition Time       | 4.0894                                      |
| Acquisition Date       | 2016-08-23T22:24:54                         |
| Spectrometer Frequency | 400.13                                      |
| Spectral Width         | 8012.8                                      |
| Lowest Frequency       | -1543.2                                     |
| Nucleus                | <sup>1</sup> H                              |
| Acquired Size          | 32768                                       |
| Spectral Size          | 65536                                       |

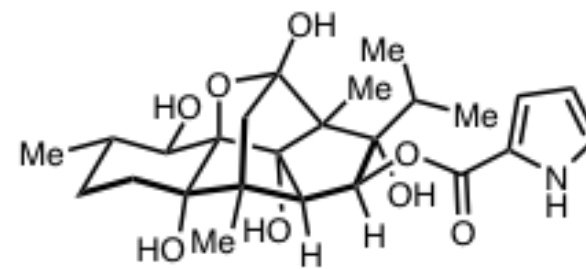

**20-deoxyspiganthine (3)**

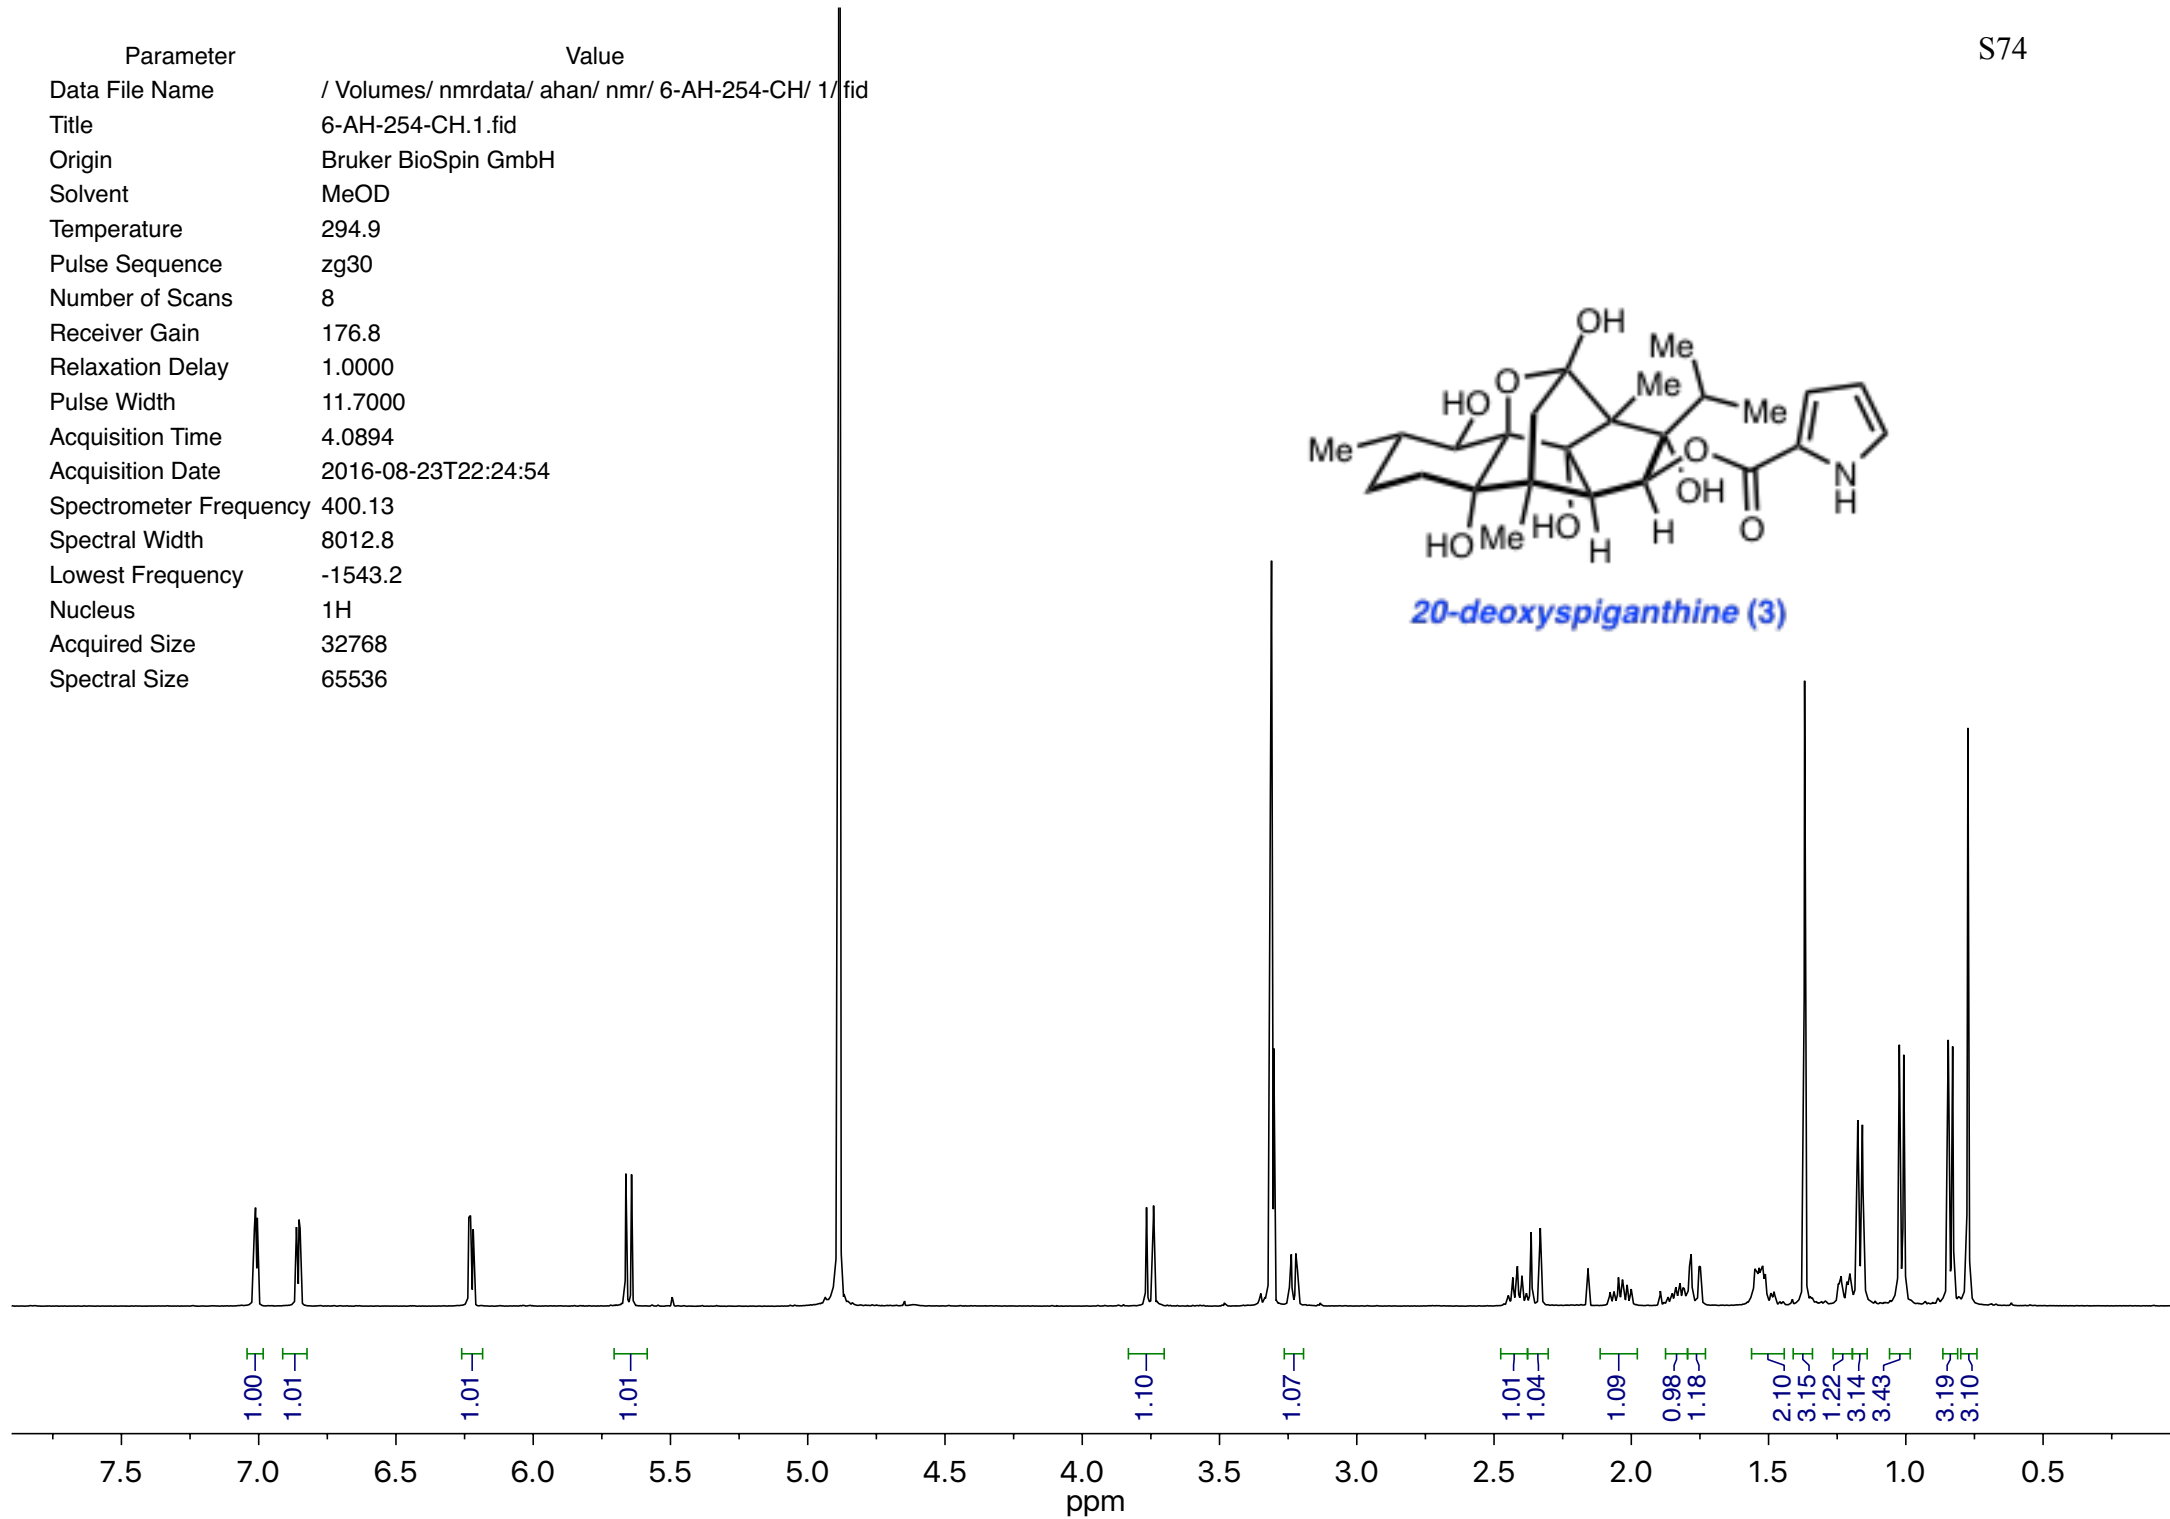

| Parameter              | Value                                              |
|------------------------|----------------------------------------------------|
| Data File Name         | / Volumes/ nmrdata/ ahan/ nmr/ 6-AH-254-CH/ 2/ fid |
| Title                  | 6-AH-254-CH.2.fid                                  |
| Origin                 | Bruker BioSpin GmbH                                |
| Solvent                | MeOD                                               |
| Temperature            | 295.0                                              |
| Pulse Sequence         | zgpg30                                             |
| Number of Scans        | 3500                                               |
| Receiver Gain          | 87.8                                               |
| Relaxation Delay       | 2.0000                                             |
| Pulse Width            | 10.0000                                            |
| Acquisition Time       | 1.3631                                             |
| Acquisition Date       | 2016-08-24T01:45:58                                |
| Spectrometer Frequency | 100.62                                             |
| Spectral Width         | 24038.5                                            |
| Lowest Frequency       | -1817.1                                            |
| Nucleus                | <sup>13</sup> C                                    |
| Acquired Size          | 32768                                              |
| Spectral Size          | 65536                                              |

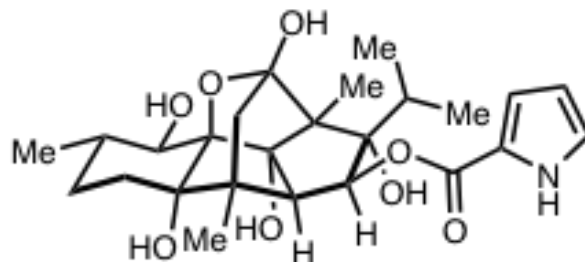

**20-deoxyspiganthine (3)**

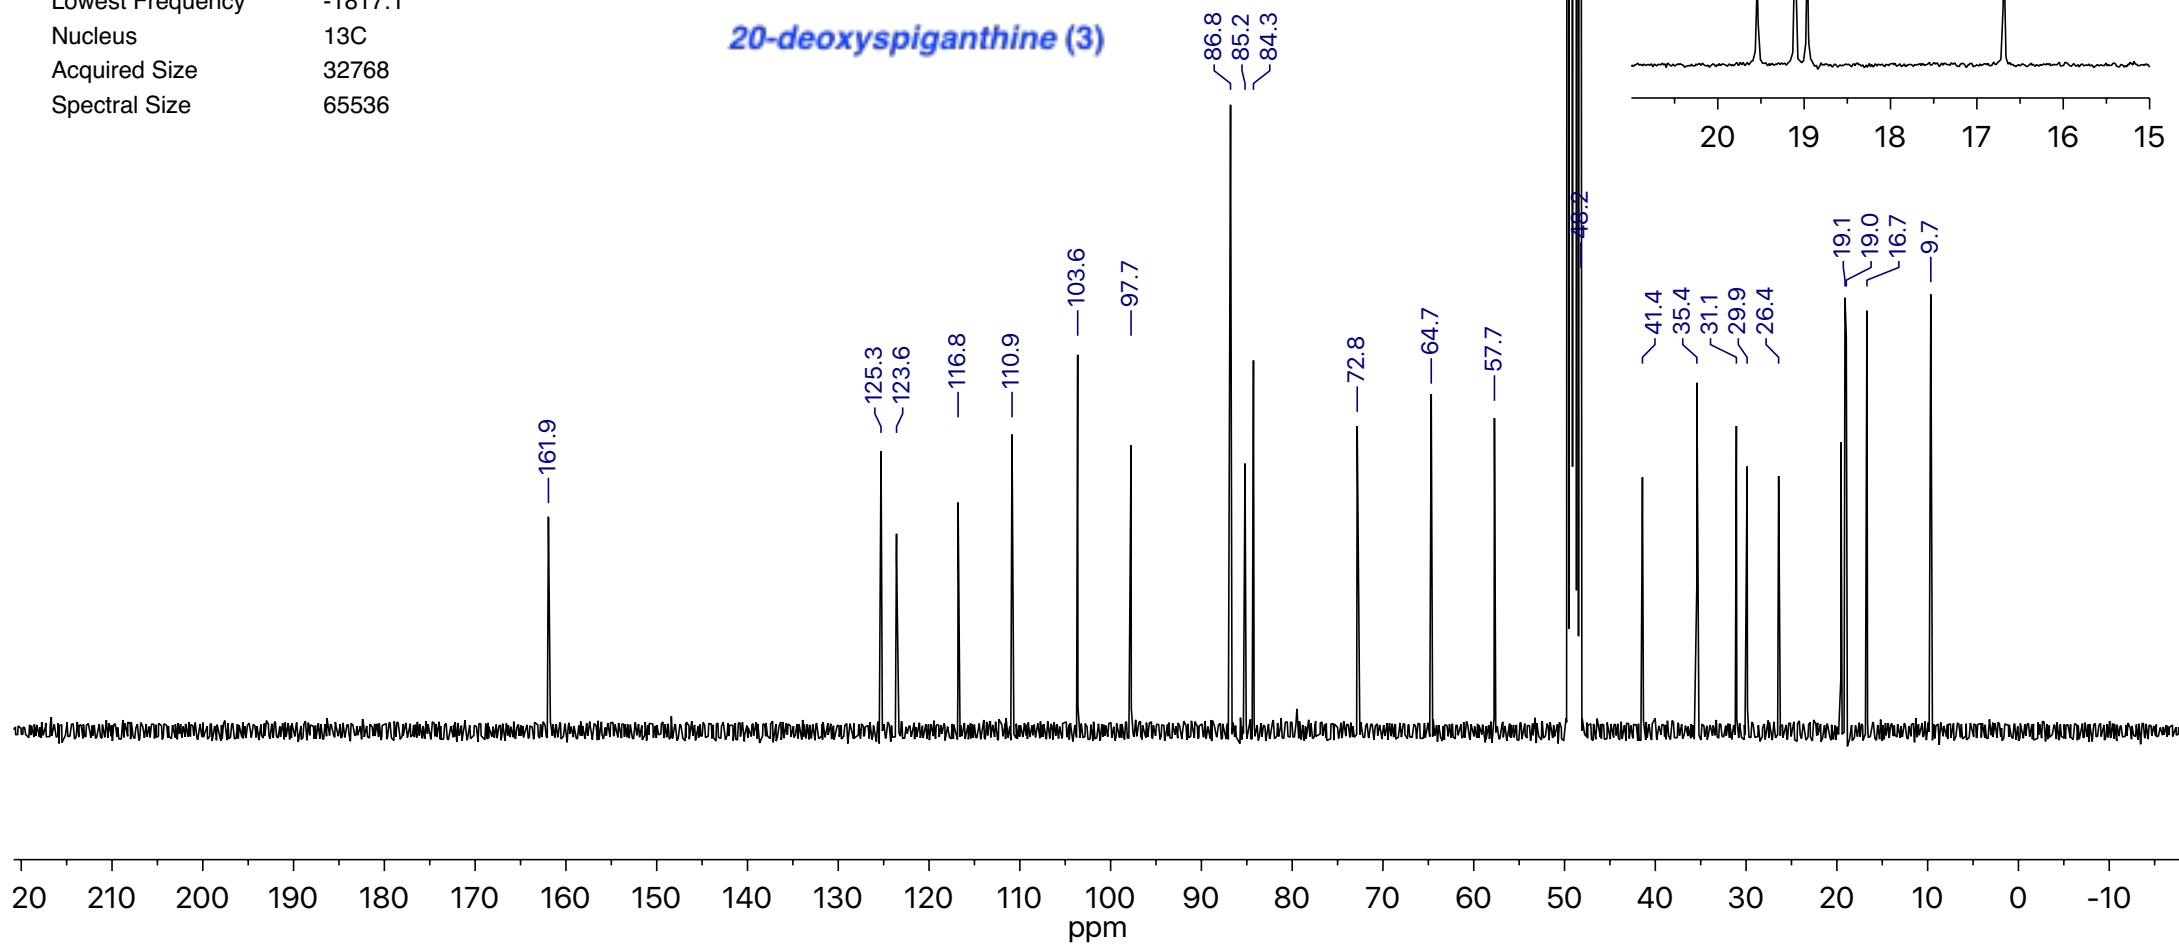

Supplement: oc6b00361_si_001.pdf [file oc6b00361_si_001.pdf]
